# Supplementary material
Source: publisher figshare collection journal article supplement (https://gsajournals.figshare.com/articles/dataset/_/14558805)
Supplement: Supplementary file 1 [file 1]

## Sheet: cor_coef_pvalue_FR_outliers
ID	mthl5	CG9577	CG3434	Cp19	CG9896	wol	CR41620	Gbs-70E	bun	DENR	CG31538	Sam-S	Eip63E	CG10672	mrva	Vm32E	CG32512	CG10932	CG4045	Alas	Baldspot	EMC2A	lncRNA:CR42491	CG3088	Ppcs	CG31681	Pglym78	CG10407	Smox	Iris	eca	CG11200	Pat1	CG14688	stck	CG33229	CG31523	ATPsynB	Adk3	AP-2sigma	RpS5b	Dp1	stw	Nep2	CG9391	Cad74A	hwt	Naa20A	CG10948
mthl5	1	-0.808911	-0.378378	-0.250031	-0.552078	-0.630534	0.531939	-0.0987123	0.395556	-0.672394	0.795264	-0.0175717	0.16168	-0.388459	-0.662433	0.540357	-0.374538	-0.679607	0.0236754	0.193679	0.955557	-0.532855	0.515754	-0.252868	0.135775	-0.00284591	-0.762756	0.336337	0.361371	0.284294	-0.233832	0.245869	0.191242	0.348466	-0.120438	0.812617	0.114806	-0.0820177	-0.803585	-0.404989	-0.861423	-0.148365	0.246044	0.744207	-0.784989	0.669506	0.482564	-0.289236	0.441768
CG9577	0.0025	1	0.648958	0.596885	0.501742	0.65886	-0.252002	-0.380223	-0.749575	0.902408	-0.507514	-0.138765	-0.598773	0.17211	0.825681	-0.245156	0.143351	0.846815	0.111764	-0.650898	-0.807634	0.671743	-0.845247	-0.119919	-0.351027	-0.0335182	0.903085	-0.167652	-0.74221	-0.600529	0.411817	-0.715775	0.0498471	-0.396575	-0.236019	-0.597556	-0.64139	-0.245349	0.639532	0.676642	0.889347	0.0904889	-0.233705	-0.838644	0.671022	-0.372054	-0.413097	0.660852	-0.655609
CG3434	0.1718	0.0346	1	0.744458	0.0884539	0.12329	0.0329121	-0.496058	-0.505927	0.443434	-0.41166	0.526817	-0.361507	0.070703	0.408243	0.283977	0.329678	0.487944	-0.257189	-0.449094	-0.205923	-0.0103325	-0.544647	-0.400222	-0.0150417	0.0958514	0.501321	0.244245	-0.49533	-0.586445	-0.0378668	-0.671083	0.665321	-0.211821	-0.371156	0.054201	-0.519735	-0.446123	0.141617	0.468182	0.569101	0.44365	-0.0501579	-0.437412	0.0622939	0.194306	-0.602691	0.371488	-0.459502
Cp19	0.2917	0.0535	0.0181	1	0.295014	0.154689	-0.27015	-0.489276	-0.402367	0.408997	-0.248776	0.227504	-0.258629	-0.0428703	0.263125	0.237657	0.346293	0.709421	0.240274	-0.508441	-0.181941	0.294194	-0.592557	-0.439821	0.260023	-0.229599	0.411692	-0.0955631	-0.407595	-0.334376	0.154714	-0.830132	0.428254	-0.572654	-0.415624	-0.18659	-0.633664	-0.535123	-0.00393741	0.218884	0.326636	0.123594	-0.306219	-0.375507	-0.0530764	0.235545	-0.197783	0.615131	-0.764638
CG9896	0.104	0.1166	0.4288	0.2534	1	0.802783	-0.155549	0.229967	-0.173426	0.4974	-0.679212	-0.276716	0.152123	-0.197525	0.504289	-0.699874	0.191909	0.464995	0.181845	0.0592216	-0.535401	0.379926	-0.601041	0.482609	0.0247847	-0.776756	0.714133	-0.836575	-0.140064	-0.00936714	0.542054	-0.498002	-0.150529	-0.881637	0.0112385	-0.564004	-0.29346	-0.51723	0.337665	0.276941	0.607103	-0.62154	-0.845082	-0.506057	0.283233	-0.421566	-0.180099	0.300001	-0.123887
wol	0.0223	0.026	0.3741	0.3569	0.0028	1	0.0292975	0.0277732	-0.308099	0.831403	-0.526826	-0.37199	-0.194368	-0.152198	0.870162	-0.532967	0.0562327	0.413241	0.297128	-0.218781	-0.697835	0.591222	-0.63869	0.543084	-0.24808	-0.389271	0.798608	-0.44011	-0.276515	-0.0842205	0.567252	-0.487585	-0.183139	-0.526074	0.224497	-0.613868	-0.459696	-0.419635	0.639171	0.70849	0.749294	-0.353633	-0.54319	-0.747003	0.664832	-0.478426	-0.376344	0.551664	-0.113277
CR41620	0.1019	0.2702	0.4625	0.2641	0.3525	0.4532	1	-0.321984	-0.123773	-0.0172144	0.353955	-0.0800422	-0.214493	-0.616896	0.0693371	0.321304	-0.567539	-0.585566	-0.169989	-0.0837252	0.544489	-0.36346	0.0158538	-0.0415222	-0.447508	-0.0244921	-0.0779081	0.358129	-0.113768	-0.230972	-0.0329896	-0.136013	0.294409	0.276944	-0.0590602	0.748406	-0.328209	-0.394321	-0.410941	0.333967	-0.0726628	-0.182945	0.120972	0.245848	-0.355023	0.493356	-0.15874	-0.121345	0.655505
Gbs-70E	0.4372	0.2259	0.1173	0.0716	0.2298	0.3679	0.2439	1	0.73451	-0.401072	-0.305285	0.0659754	0.71978	0.468125	-0.196461	-0.686851	0.522786	-0.187298	-0.38982	0.891536	-0.0792546	-0.375033	0.26771	0.774466	0.444335	-0.382295	-0.118173	-0.522559	0.709727	0.733117	0.231721	0.590453	-0.0638777	-0.204665	0.206567	-0.249725	0.809707	0.0940375	0.28363	-0.284072	-0.220299	-0.319406	-0.457845	-0.0220393	0.0823062	-0.622732	0.257017	-0.328546	0.299803
bun	0.1293	0.0162	0.1027	0.1449	0.2827	0.2263	0.4212	0.1164	1	-0.667593	0.0567004	0.348778	0.846555	0.164926	-0.51027	-0.0519642	0.47278	-0.553692	-0.107997	0.8593	0.415866	-0.578542	0.671137	0.570797	0.756382	-0.145015	-0.636251	-0.0670725	0.991049	0.943431	-0.185852	0.651065	0.0935249	0.0523982	0.430243	0.135737	0.767256	0.0539278	-0.151443	-0.461048	-0.657423	-0.0209116	-0.140512	0.379514	-0.314917	-0.0246548	0.205772	-0.36075	0.403126
DENR	0.0226	0.0011	0.1403	0.1569	0.1091	0.0044	0.4935	0.1796	0.0231	1	-0.339551	-0.323509	-0.639464	-0.0162569	0.954773	-0.1997	-0.032036	0.64552	0.311573	-0.673313	-0.751545	0.75469	-0.780479	0.0715589	-0.443523	-0.0148391	0.849628	-0.0752696	-0.655248	-0.456215	0.479538	-0.675296	-0.0592145	-0.289362	-0.0124121	-0.56222	-0.719673	-0.298837	0.667666	0.846975	0.826082	0.000566526	-0.198581	-0.844274	0.753492	-0.334956	-0.415113	0.75867	-0.460624
CG31538	0.0217	0.1047	0.1515	0.2918	0.0471	0.0678	0.1963	0.2411	0.4059	0.1987	1	-0.379514	-0.332397	-0.128727	-0.389075	0.513727	-0.549088	-0.366167	0.18916	-0.229315	0.619244	-0.0707249	0.305212	-0.430026	-0.217594	0.293028	-0.576323	0.466997	-0.0099298	0.0640422	-0.0276351	0.189724	-0.0471302	0.552536	-0.225246	0.524482	-0.065668	0.194348	-0.467032	-0.173594	-0.722737	-0.0410316	0.481822	0.454948	-0.345441	0.417477	0.644326	0.0267796	0.0972252
Sam-S	0.5558	0.3688	0.0915	0.2966	0.2406	0.1712	0.4421	0.3722	0.1922	0.2194	0.1765	1	0.449739	0.138412	-0.262126	0.401985	0.600072	-0.201826	-0.386896	0.329419	0.227934	-0.611987	0.341221	-0.0506797	0.587944	0.260027	-0.268904	0.378892	0.389227	0.119276	-0.611979	0.13788	0.582363	0.107352	0.183883	0.285622	0.309206	-0.0693136	-0.148696	-0.172509	-0.0377474	0.670572	0.161566	0.178359	-0.311254	0.330145	-0.575507	-0.301816	0.0616551
Eip63E	0.3114	0.0627	0.1901	0.2765	0.3715	0.3354	0.3182	0.0574	0.0135	0.0389	0.2034	0.146	1	-0.0291607	-0.536772	-0.209336	0.478012	-0.446351	-0.11376	0.89877	0.282694	-0.550145	0.586483	0.548625	0.767834	-0.345943	-0.460705	-0.347433	0.886628	0.747498	-0.311298	0.514871	-0.0135217	-0.235859	0.451205	0.0334812	0.714313	0.00361657	-0.241392	-0.603924	-0.384871	-0.120496	-0.315764	0.427822	-0.403095	0.00169652	-0.0189717	-0.554633	0.430893
CG10672	0.179	0.3357	0.4237	0.4634	0.3342	0.3747	0.0501	0.1523	0.3495	0.4832	0.3897	0.3633	0.485	1	0.0888241	-0.344688	0.605318	0.4029	-0.473692	0.188056	-0.400308	-0.0318877	-0.0992408	0.12528	0.169035	0.215078	0.127066	-0.026839	0.0865906	0.185376	0.272374	0.297986	0.175238	0.109028	-0.239916	-0.395489	0.474605	0.3194	0.621676	0.0460174	0.013965	0.284724	-0.00243813	-0.434439	0.464816	-0.686517	0.226853	0.145041	-0.449866
mrva	0.0292	0.0046	0.1597	0.2538	0.1015	0.0017	0.432	0.3549	0.0923	0.0004	0.1703	0.2678	0.0854	0.4158	1	-0.315516	0.0839969	0.538263	0.113737	-0.477055	-0.727505	0.582427	-0.759369	0.282555	-0.407013	-0.0680922	0.861724	-0.0886008	-0.509235	-0.319314	0.565899	-0.567513	0.0674506	-0.268513	0.0122079	-0.512936	-0.574844	-0.369666	0.766439	0.933192	0.810187	-0.0352324	-0.28773	-0.907293	0.789156	-0.459174	-0.43453	0.719801	-0.314781
Vm32E	0.1087	0.2773	0.2488	0.269	0.0271	0.073	0.2184	0	0.5144	0.3112	0.1114	0.1765	0.317	0.2002	0.2132	1	-0.231656	-0.328176	0.238818	-0.384846	0.570658	-0.187438	0.369785	-0.640128	0.0943779	0.580647	-0.539398	0.834011	-0.0336812	-0.176326	-0.634675	-0.0709082	0.283828	0.524193	0.065464	0.593871	-0.26545	0.0527861	-0.555752	-0.101542	-0.375159	0.617663	0.676669	0.459699	-0.452851	0.865154	-0.187398	-0.0135638	-0.0154512
CG32512	0.191	0.3603	0.2059	0.1994	0.335	0.4516	0.0717	0.0999	0.1321	0.4749	0.0747	0.0589	0.1154	0.0589	0.4169	0.2722	1	0.328109	-0.282391	0.437763	-0.256865	-0.233502	-0.078014	0.384457	0.758304	-0.188271	0.128294	-0.208363	0.452363	0.472434	0.112752	0.0163992	0.472916	-0.392235	0.0413653	-0.360153	0.36774	-0.230067	0.418133	0.0208795	0.0799316	0.253368	-0.423354	-0.393558	0.158084	-0.365961	-0.194348	0.197124	-0.368652
CG10932	0.0093	0.0004	0.1148	0.0304	0.1009	0.168	0.051	0.3685	0.0325	0.04	0.1824	0.3321	0.1116	0.1683	0.0881	0.2216	0.2245	1	0.13377	-0.511371	-0.711471	0.642397	-0.798616	-0.201655	-0.0681591	-0.208665	0.736065	-0.384719	-0.588776	-0.372612	0.535327	-0.643669	0.0456146	-0.557434	-0.458439	-0.678988	-0.456515	-0.195763	0.540584	0.352415	0.57663	-0.0518979	-0.378133	-0.742796	0.512728	-0.448647	0.017864	0.686695	-0.901113
CG4045	0.4266	0.4195	0.2684	0.2805	0.3403	0.2313	0.3615	0.1352	0.4567	0.2291	0.3091	0.1584	0.4125	0.1101	0.387	0.2751	0.2557	0.3289	1	-0.430439	-0.141876	0.696657	0.0303141	-0.0659546	0.0747162	0.0138871	-0.0734257	-0.0361351	-0.0635872	0.111924	-0.0598326	-0.242351	-0.560342	-0.144564	0.426015	-0.36658	-0.422518	0.0519699	-0.0768922	-0.0278999	-0.0342426	-0.0722266	0.0738336	0.0365443	0.127874	0.244311	0.0366971	0.376416	-0.258274
Alas	0.2502	0.048	0.1348	0.0665	0.4532	0.319	0.4571	0.0234	0.027	0.0208	0.3139	0.199	0.0036	0.3348	0.1063	0.1588	0.164	0.0575	0.1075	1	0.29085	-0.685736	0.531269	0.648468	0.565637	-0.332755	-0.403711	-0.334135	0.861746	0.740785	-0.107611	0.654627	0.0741286	-0.0913027	0.284323	0.122398	0.847894	0.0385275	-0.104096	-0.47899	-0.410676	-0.214804	-0.320613	0.337371	-0.305374	-0.220502	0.13257	-0.594275	0.556209
Baldspot	0.0007	0.0084	0.3144	0.3469	0.0871	0.0166	0.0874	0.4402	0.1543	0.0109	0.0642	0.2763	0.2478	0.1599	0.0128	0.0827	0.279	0.0157	0.3837	0.2182	1	-0.712759	0.544061	-0.278118	0.227859	-0.0180944	-0.758431	0.345689	0.398105	0.227182	-0.37373	0.234978	0.341073	0.303706	-0.135602	0.90286	0.170262	-0.139478	-0.872892	-0.461189	-0.79528	-0.0537176	0.221273	0.795879	-0.900801	0.744609	0.309786	-0.426579	0.49571
EMC2A	0.0595	0.028	0.5045	0.2346	0.1749	0.073	0.1938	0.156	0.0399	0.0165	0.4591	0.0346	0.0615	0.4849	0.0644	0.3521	0.2921	0.0624	0.0411	0.0127	0.0181	1	-0.49016	-0.0843621	-0.366147	0.0536379	0.51925	-0.201531	-0.565983	-0.301608	0.343727	-0.421656	-0.578234	-0.216251	0.0926802	-0.736494	-0.548782	0.133828	0.478949	0.358071	0.492304	-0.0953299	-0.0235849	-0.521375	0.670647	-0.313717	0.00163724	0.609577	-0.575265
lncRNA:CR42491	0.082	0.0036	0.0854	0.0647	0.0534	0.0491	0.4833	0.3095	0.0161	0.0144	0.237	0.2039	0.0576	0.402	0.0188	0.1729	0.4174	0.0087	0.4833	0.0753	0.0783	0.117	1	0.074996	0.368401	0.420363	-0.918614	0.376649	0.709312	0.510345	-0.752747	0.840945	-0.256207	0.593008	0.572994	0.371479	0.701211	0.581255	-0.462932	-0.696721	-0.693249	0.330101	0.543987	0.805925	-0.429555	0.353074	0.0752628	-0.73538	0.559463
CG3088	0.2832	0.3996	0.156	0.1362	0.1111	0.1009	0.4833	0.0222	0.1038	0.4267	0.1351	0.4948	0.0944	0.3862	0.2471	0.0344	0.179	0.3362	0.4589	0.0575	0.2466	0.4393	0.436	1	0.27051	-0.387828	0.153808	-0.439211	0.58644	0.667869	0.320094	0.316624	-0.131776	-0.270365	0.53023	-0.374148	0.423892	-0.156371	0.481501	0.18951	0.116866	-0.331963	-0.515966	-0.291663	0.358302	-0.575846	-0.127817	-0.0252117	0.394383
Ppcs	0.3625	0.1932	0.4917	0.2657	0.4758	0.2806	0.1311	0.1749	0.0116	0.1347	0.3106	0.0637	0.0133	0.3463	0.1676	0.422	0.0173	0.4322	0.4368	0.0943	0.2937	0.1882	0.1936	0.2492	1	-0.234725	-0.403273	-0.151041	0.761369	0.72764	-0.219943	0.182075	0.281756	-0.321498	0.251602	-0.0734256	0.441677	-0.167838	-0.146694	-0.439736	-0.412534	0.153135	-0.29031	0.18249	-0.336386	0.11478	0.0067144	-0.0594613	-0.126629
CG31681	0.5649	0.393	0.3709	0.3253	0.0505	0.105	0.4989	0.0691	0.4318	0.5238	0.1973	0.2057	0.2273	0.2798	0.4754	0.0762	0.3732	0.3571	0.3671	0.1719	0.516	0.3259	0.1636	0.1204	0.2325	1	-0.344744	0.855156	-0.127321	-0.238753	-0.603029	0.381695	-0.124879	0.876154	0.295963	0.12453	0.114736	0.68617	0.087154	0.0156866	-0.0659427	0.853274	0.944377	0.156705	0.226946	0.193367	-0.268253	-0.156884	-0.028675
Pglym78	0.0057	0.0009	0.1048	0.1542	0.0205	0.0031	0.4241	0.404	0.0405	0.0048	0.0731	0.2626	0.1295	0.3812	0.0041	0.0785	0.3745	0.0104	0.4292	0.1846	0.0135	0.0996	0.002	0.3534	0.1573	0.2434	1	-0.424863	-0.639309	-0.487455	0.645431	-0.680418	0.0890712	-0.555356	-0.297675	-0.539707	-0.551084	-0.429848	0.652969	0.725906	0.896023	-0.252102	-0.521801	-0.867483	0.627059	-0.529295	-0.317731	0.579154	-0.410076
CG10407	0.1349	0.3271	0.2471	0.4779	0.0175	0.088	0.2085	0.0121	0.5117	0.4544	0.1484	0.1717	0.1905	0.503	0.4432	0.0024	0.3393	0.1545	0.5371	0.1714	0.1649	0.3389	0.1902	0.0941	0.3538	0.1012	0.172	1	-0.0622143	-0.201213	-0.563518	0.176316	0.259683	0.830248	0.162695	0.504905	-0.0783405	0.278665	-0.172564	0.14935	-0.218875	0.785997	0.848216	0.238944	-0.0780931	0.524282	-0.292146	-0.0481185	0.101034
Smox	0.1487	0.0178	0.1087	0.143	0.321	0.2604	0.4272	0.1144	0.0004	0.0271	0.5411	0.1772	0.0049	0.4145	0.0898	0.5191	0.1433	0.028	0.4876	0.0236	0.1699	0.0463	0.0111	0.0889	0.0104	0.4206	0.0389	0.5	1	0.925319	-0.269564	0.655563	0.0444206	0.0494655	0.522343	0.124262	0.759103	0.0719047	-0.171646	-0.478424	-0.609434	0.00924809	-0.119014	0.412273	-0.319457	0.0159423	0.10903	-0.412222	0.45005
Iris	0.1704	0.0758	0.0609	0.2123	0.467	0.4833	0.3129	0.1162	0.0051	0.1201	0.3886	0.3371	0.0356	0.3309	0.2366	0.3987	0.1398	0.1491	0.336	0.0843	0.2592	0.227	0.0889	0.0542	0.0142	0.2485	0.1197	0.3242	0.0057	1	0.0358223	0.53341	-0.0439308	-0.0829359	0.459659	-0.106388	0.638917	0.00643498	0.0251103	-0.328487	-0.578921	-0.149899	-0.265144	0.182123	-0.110807	-0.178173	0.292447	-0.109995	0.241579
eca	0.312	0.1595	0.4666	0.3572	0.072	0.0719	0.4685	0.3015	0.3487	0.1183	0.4788	0.0484	0.2299	0.2476	0.0738	0.0431	0.3853	0.0921	0.4569	0.4243	0.1761	0.2096	0.0192	0.2082	0.3083	0.0362	0.0449	0.0587	0.2724	0.4409	1	-0.432816	0.110832	-0.535256	-0.481763	-0.377852	-0.294513	-0.490652	0.49451	0.526653	0.25737	-0.659143	-0.691482	-0.689056	0.410093	-0.609352	0.40611	0.649295	-0.323705
CG11200	0.2722	0.027	0.0351	0.0018	0.114	0.0958	0.3864	0.0952	0.0604	0.0341	0.3112	0.3461	0.1085	0.23	0.0699	0.4489	0.4844	0.0266	0.2865	0.0559	0.2822	0.1439	0.0028	0.2128	0.3328	0.1744	0.032	0.3296	0.0548	0.1079	0.1414	1	-0.347313	0.596904	0.469749	0.1189	0.905435	0.724022	-0.061376	-0.557697	-0.538065	0.197259	0.420329	0.517579	-0.074204	-0.167156	0.21722	-0.713947	0.531719
Pat1	0.2984	0.4566	0.0351	0.1523	0.356	0.3428	0.2508	0.4435	0.3882	0.4501	0.4771	0.0722	0.5086	0.336	0.4492	0.2581	0.1218	0.446	0.0662	0.4131	0.1987	0.0569	0.2744	0.3871	0.2434	0.3843	0.4173	0.2331	0.4333	0.4663	0.3935	0.1856	1	-0.11897	-0.474812	0.477434	-0.132288	-0.64203	-0.0929023	0.310349	-0.0304871	0.20985	-0.208391	-0.180613	-0.312426	0.244678	-0.191964	0.2283	-0.107159
CG14688	0.14	0.1941	0.3012	0.0387	0.0063	0.0464	0.2558	0.3192	0.3567	0.264	0.1117	0.3353	0.2984	0.3851	0.2772	0.1183	0.1726	0.0398	0.403	0.4807	0.1982	0.3179	0.0394	0.2706	0.2093	0.0525	0.0781	0.0546	0.3774	0.4738	0.0761	0.0759	0.4045	1	0.24366	0.425748	0.283521	0.660883	-0.124425	-0.0913798	-0.354414	0.589922	0.919455	0.399528	0.00201979	0.24127	-0.0127125	-0.37302	0.341024
stck	0.3958	0.2878	0.1909	0.1625	0.4803	0.2928	0.4516	0.3308	0.1551	0.4869	0.2966	0.3356	0.1342	0.2787	0.481	0.4303	0.4671	0.1377	0.1445	0.2641	0.3811	0.417	0.0719	0.0869	0.2747	0.3151	0.2354	0.355	0.0946	0.1336	0.1129	0.1069	0.1133	0.2997	1	-0.24249	0.316366	0.343325	0.141153	-0.0907849	0.00143348	0.287322	0.246022	0.169065	0.226965	0.0126115	-0.455987	-0.259736	0.412551
CG33229	0.0039	0.058	0.4598	0.3219	0.0672	0.0599	0.0159	0.2793	0.4064	0.0702	0.0872	0.2509	0.483	0.1645	0.0911	0.0598	0.1913	0.0361	0.1844	0.424	0.0006	0.0238	0.1755	0.172	0.4281	0.4443	0.0859	0.0828	0.4179	0.3774	0.1792	0.4055	0.1114	0.1365	0.2736	1	0.018231	-0.175023	-0.76643	-0.198492	-0.518988	0.0702219	0.327609	0.651017	-0.781786	0.731354	0.0704702	-0.424073	0.547442
CG31523	0.293	0.0499	0.095	0.0226	0.1965	0.0851	0.2253	0.0684	0.0663	0.0122	0.4884	0.2043	0.0478	0.1245	0.0566	0.2939	0.209	0.0953	0.1221	0.0286	0.3081	0.0561	0.0109	0.1749	0.1477	0.2882	0.0765	0.4835	0.0609	0.1112	0.248	0.0023	0.3898	0.205	0.237	0.5062	1	0.523516	0.0103964	-0.601372	-0.480135	0.111565	0.100501	0.385892	-0.122386	-0.308842	0.2218	-0.671488	0.391399
ATPsynB	0.4397	0.2763	0.1333	0.0858	0.0952	0.1491	0.168	0.3758	0.4405	0.2341	0.3183	0.4463	0.4926	0.2157	0.1811	0.4439	0.285	0.3365	0.4609	0.4425	0.3795	0.3723	0.0649	0.3473	0.3375	0.0036	0.1423	0.2781	0.4267	0.4727	0.1108	0.0217	0.0362	0.0344	0.2088	0.3351	0.0975	1	0.0723786	-0.472674	-0.210903	0.411015	0.707138	0.34575	0.212961	-0.168625	0.149501	-0.494092	0.0671248
Adk3	0.0304	0.0561	0.3742	0.4661	0.1949	0.0131	0.1661	0.2586	0.2834	0.0297	0.1455	0.3109	0.2597	0.0464	0.0092	0.0928	0.1609	0.0499	0.3909	0.334	0.0053	0.0987	0.1155	0.0948	0.3629	0.5344	0.0424	0.2781	0.2824	0.5419	0.1043	0.4176	0.3915	0.3083	0.3616	0.0065	0.5574	0.448	1	0.617444	0.615817	0.119574	-0.208009	-0.874814	0.949701	-0.845506	-0.235322	0.491943	-0.37791
AP-2sigma	0.1719	0.0302	0.1272	0.284	0.2658	0.0229	0.2104	0.3059	0.1313	0.0057	0.3372	0.3353	0.0548	0.4491	0.0002	0.3978	0.483	0.2009	0.4935	0.1205	0.1231	0.2055	0.0291	0.3031	0.1429	0.5514	0.0197	0.3739	0.1158	0.2356	0.098	0.0728	0.2314	0.4223	0.4084	0.3151	0.0466	0.1107	0.045	1	0.648759	0.0347229	-0.174984	-0.807005	0.621161	-0.26844	-0.410678	0.707613	-0.190907
RpS5b	0.0044	0.0041	0.0646	0.2263	0.0723	0.0044	0.4258	0.2667	0.0677	0.0047	0.0344	0.4368	0.1821	0.4892	0.006	0.1642	0.4201	0.0407	0.447	0.1836	0.0131	0.101	0.025	0.4101	0.1523	0.3348	0.0012	0.2764	0.0788	0.0998	0.273	0.09	0.4547	0.2124	0.4881	0.0834	0.1397	0.3046	0.0727	0.0426	1	0.0472126	-0.251313	-0.726354	0.64231	-0.392705	-0.648822	0.347948	-0.269602
Dp1	0.3953	0.438	0.1353	0.3628	0.0779	0.1831	0.3453	0.1879	0.5472	0.4811	0.5104	0.0604	0.4057	0.2562	0.4765	0.0652	0.2844	0.509	0.4722	0.3132	0.4811	0.4598	0.2247	0.2101	0.3585	0.0328	0.296	0.0579	0.4215	0.3953	0.0281	0.3007	0.2858	0.1205	0.246	0.4536	0.3177	0.1586	0.4266	0.4614	0.495	1	0.715498	0.0306694	0.143176	0.247421	-0.523983	-0.0634805	-0.199497
stw	0.2215	0.2974	0.4489	0.2467	0.016	0.0237	0.3693	0.0267	0.3871	0.3515	0.1477	0.289	0.2225	0.5333	0.2685	0.0417	0.1529	0.1605	0.3682	0.1978	0.2415	0.5441	0.0616	0.0416	0.2068	0.0073	0.1039	0.0565	0.4189	0.2332	0.0159	0.1753	0.3165	0.0082	0.3063	0.2229	0.2872	0.0162	0.2503	0.3706	0.2598	0.0777	1	0.42835	-0.0260849	0.398475	-0.117824	-0.316694	0.120614
Nep2	0.0236	0.0035	0.1427	0.178	0.0965	0.0123	0.2767	0.4661	0.1762	0.0051	0.1386	0.318	0.1479	0.1415	0.0018	0.1312	0.1676	0.0104	0.4554	0.207	0.0114	0.0957	0.0084	0.2356	0.3319	0.3463	0.0033	0.2762	0.1607	0.3371	0.0317	0.0989	0.3459	0.1606	0.3461	0.038	0.1723	0.2011	0.0028	0.0071	0.0209	0.4533	0.1354	1	-0.805884	0.658017	0.249039	-0.768205	0.551997
CG9391	0.0164	0.0403	0.455	0.451	0.2482	0.0156	0.1972	0.4947	0.2225	0.0127	0.2032	0.2219	0.1668	0.1199	0.0074	0.1326	0.3506	0.0716	0.4036	0.2402	0.0007	0.0222	0.1431	0.192	0.1999	0.3407	0.0551	0.3712	0.2268	0.353	0.1661	0.4233	0.228	0.5519	0.2854	0.0074	0.3443	0.313	0.0004	0.0493	0.0513	0.4028	0.405	0.0098	1	-0.753676	-0.240618	0.492988	-0.365111
Cad74A	0.0437	0.1704	0.316	0.281	0.1686	0.1097	0.1111	0.0072	0.5416	0.2055	0.1618	0.2158	0.4917	0.0313	0.1237	0.0113	0.1869	0.1234	0.28	0.3309	0.019	0.2367	0.1853	0.0581	0.4057	0.3208	0.089	0.1249	0.4422	0.3818	0.0566	0.3543	0.2759	0.2834	0.4961	0.0177	0.243	0.3412	0.0075	0.2599	0.1627	0.2894	0.1943	0.0441	0.0276	1	-0.145412	-0.202705	0.217637
hwt	0.1258	0.1519	0.053	0.3125	0.348	0.1843	0.3504	0.3015	0.3296	0.1497	0.0434	0.0684	0.4973	0.2888	0.1368	0.3362	0.3247	0.4805	0.4629	0.3769	0.2423	0.4963	0.4299	0.3867	0.499	0.3003	0.215	0.2693	0.3916	0.2636	0.1558	0.3044	0.3287	0.5051	0.1266	0.4325	0.3055	0.3509	0.2913	0.1511	0.0413	0.0884	0.4205	0.2723	0.2822	0.353	1	0.0139277	-0.118738
Naa20A	0.2402	0.0303	0.1829	0.054	0.2398	0.0837	0.3861	0.1906	0.1772	0.0149	0.4635	0.2288	0.0671	0.3643	0.0221	0.4966	0.3206	0.0358	0.1729	0.0536	0.1404	0.0637	0.0216	0.4851	0.4531	0.33	0.0679	0.488	0.1443	0.4066	0.0396	0.0195	0.2992	0.1769	0.2776	0.1464	0.0296	0.0983	0.1014	0.0247	0.1936	0.4443	0.2067	0.0125	0.1111	0.3257	0.4836	1	-0.6995
CG10948	0.1024	0.0195	0.132	0.0088	0.3801	0.3079	0.0165	0.1852	0.1209	0.1404	0.4673	0.5079	0.1229	0.152	0.2527	0.4115	0.2249	0.0099	0.2366	0.0318	0.0875	0.1108	0.0761	0.1435	0.3568	0.3278	0.1705	0.4735	0.0902	0.2679	0.2375	0.0539	0.3747	0.1597	0.1575	0.0941	0.1239	0.4582	0.1466	0.3482	0.2626	0.2417	0.437	0.0682	0.18	0.3572	0.3853	0.0362	1
Zip48C	0.4568	0.2907	0.4044	0.3993	0.2012	0.2718	0.3681	0.0372	0.0403	0.3325	0.1123	0.1889	0.0294	0.2599	0.4639	0.148	0.019	0.3777	0.2808	0.0366	0.5072	0.1261	0.3896	0.0147	0.0285	0.0554	0.4727	0.1815	0.0385	0.0355	0.3314	0.2667	0.221	0.1652	0.2156	0.3397	0.1398	0.2067	0.2627	0.4806	0.3871	0.4018	0.0062	0.3342	0.4965	0.1846	0.4058	0.4784	0.318
mRpS25	0.0166	0.0367	0.077	0.3135	0.1679	0.2032	0.3438	0.3	0.0911	0.1362	0.0185	0.3019	0.3316	0.4624	0.1762	0.2439	0.4442	0.1569	0.2751	0.2681	0.0606	0.3061	0.1821	0.4161	0.2125	0.4364	0.0556	0.3181	0.1071	0.0511	0.3728	0.2608	0.4232	0.2955	0.5027	0.2114	0.2946	0.4274	0.1976	0.2999	0.0055	0.3184	0.4333	0.2016	0.1969	0.2879	0.0411	0.3834	0.3826
seq	0.1794	0.3578	0.1688	0.1489	0.2586	0.5216	0.2675	0.3335	0.1763	0.3224	0.3301	0.1389	0.1619	0.2509	0.3868	0.3771	0.175	0.4582	0.336	0.1754	0.1252	0.0569	0.3761	0.3692	0.0825	0.0021	0.4749	0.3264	0.1858	0.2368	0.4208	0.1497	0.0291	0.0546	0.2904	0.1505	0.4132	0.0043	0.1722	0.498	0.3503	0.2955	0.0322	0.413	0.0744	0.1966	0.3928	0.4159	0.4553
CG9259	0.4633	0.1957	0.1915	0.0739	0.2146	0.1979	0.1223	0.0536	0.1122	0.1182	0.4622	0.2645	0.1462	0.0093	0.2448	0.1824	0.1102	0.3731	0.0692	0.0844	0.4406	0.1546	0.1487	0.1753	0.2133	0.2088	0.2537	0.4935	0.1157	0.1185	0.4881	0.0158	0.5139	0.2096	0.3913	0.3395	0.0063	0.1155	0.1946	0.2287	0.2239	0.2794	0.3468	0.4561	0.3616	0.0482	0.2721	0.1729	0.4462
chrb	0.3804	0.1024	0.3823	0.1294	0.0273	0.0198	0.3017	0.2634	0.1415	0.0567	0.4576	0.0626	0.167	0.1365	0.0794	0.2647	0.2702	0.1119	0.141	0.1491	0.2929	0.0774	0.0157	0.4915	0.231	0.0374	0.0499	0.1424	0.1261	0.2865	0.032	0.0106	0.4618	0.0347	0.2165	0.2848	0.01	0.0378	0.4163	0.1136	0.1684	0.0345	0.0601	0.1404	0.3755	0.4624	0.3846	0.0343	0.2802
Cerk	0.3869	0.4366	0.447	0.2704	0.1564	0.1981	0.1371	0.1304	0.2748	0.454	0.397	0.3531	0.3636	0.4478	0.2626	0.0522	0.4021	0.4116	0.0537	0.1565	0.4139	0.1745	0.2133	0.0972	0.3798	0.0017	0.2	0.1161	0.3253	0.2646	0.0453	0.4512	0.1761	0.2099	0.2587	0.356	0.3691	0.0669	0.3516	0.174	0.4288	0.0256	0.0129	0.2454	0.5183	0.1719	0.3827	0.4393	0.1246
Pex19	0.0264	0.0716	0.3534	0.4823	0.4302	0.3868	0.0819	0.376	0.1178	0.1266	0.3086	0.3611	0.112	0.07	0.1793	0.3298	0.495	0.0627	0.5145	0.1669	0.0152	0.0609	0.2833	0.3077	0.1583	0.0127	0.1727	0.4379	0.1121	0.1765	0.4776	0.4422	0.1762	0.2985	0.5015	0.0563	0.4533	0.0529	0.0398	0.3266	0.1077	0.1396	0.2093	0.1355	0.0194	0.0964	0.384	0.3536	0.079
Muted	0.0147	0.0387	0.2752	0.4544	0.0685	0.0062	0.3964	0.4772	0.1951	0.0149	0.0219	0.4801	0.4257	0.4867	0.0094	0.1933	0.3575	0.2137	0.355	0.3197	0.0167	0.111	0.2074	0.1353	0.344	0.4655	0.0281	0.2786	0.2682	0.2866	0.4361	0.3196	0.294	0.2343	0.0977	0.0422	0.2612	0.4561	0.044	0.0714	0.0024	0.3612	0.2629	0.0459	0.0185	0.1544	0.0129	0.2976	0.4447
Tsp74F	0.0585	0.086	0.3786	0.3301	0.1345	0.0074	0.4824	0.4111	0.274	0.0127	0.2946	0.0769	0.1876	0.4323	0.0055	0.1235	0.3914	0.2544	0.2293	0.2791	0.0173	0.0449	0.1537	0.0983	0.1451	0.45	0.0572	0.3848	0.284	0.5115	0.1125	0.3815	0.1624	0.4591	0.1927	0.0525	0.2666	0.4854	0.0029	0.0273	0.0554	0.3704	0.3803	0.0304	0.0006	0.0521	0.2969	0.1074	0.4164
Sep4	0.2634	0.0766	0.0152	0.0335	0.2199	0.1708	0.3	0.0573	0.1685	0.0913	0.1352	0.1726	0.3561	0.1411	0.1325	0.2018	0.3603	0.2535	0.2871	0.1233	0.3945	0.3668	0.1604	0.3759	0.4231	0.4932	0.1596	0.2922	0.2236	0.1573	0.3878	0.0107	0.1571	0.1767	0.4504	0.4997	0.0176	0.0522	0.4637	0.1212	0.064	0.2448	0.3678	0.2218	0.4708	0.1558	0.01	0.1606	0.2553
mRpL44	0.0189	0.0001	0.0273	0.0377	0.0947	0.0264	0.37	0.2137	0.0095	0.0033	0.1235	0.3461	0.0611	0.4047	0.008	0.2597	0.3869	0.0013	0.4643	0.0518	0.0262	0.0548	0.0005	0.3524	0.1723	0.3259	0.0016	0.3226	0.0107	0.0495	0.1083	0.0104	0.3709	0.1451	0.1944	0.1023	0.0246	0.1637	0.0844	0.0298	0.0036	0.4477	0.2458	0.0056	0.0837	0.2203	0.1767	0.031	0.0234
Cp38	0.3207	0.3061	0.0568	0.0284	0.3857	0.368	0.2275	0.0252	0.2856	0.2799	0.4648	0.2255	0.4057	0.0426	0.3877	0.0713	0.4799	0.4075	0.1785	0.1357	0.2665	0.4497	0.2897	0.1863	0.3229	0.3896	0.4302	0.27	0.3233	0.2658	0.3236	0.0182	0.1607	0.2246	0.4645	0.2578	0.0182	0.0434	0.1676	0.3165	0.3626	0.3538	0.4365	0.468	0.1787	0.0218	0.1354	0.2063	0.3069
orb2	0.0931	0.0282	0.0842	0.0409	0.0015	0.014	0.4874	0.4226	0.2642	0.0322	0.0476	0.4794	0.4238	0.2922	0.0388	0.2643	0.2143	0.0723	0.2891	0.3103	0.1311	0.1898	0.0218	0.2915	0.3891	0.0295	0.0185	0.1328	0.2754	0.3931	0.1294	0.0049	0.2691	0.0009	0.4245	0.1565	0.0281	0.0121	0.2244	0.0757	0.0306	0.283	0.0091	0.0397	0.2745	0.3902	0.1332	0.0487	0.2269
CG3036	0.5206	0.2733	0.4853	0.4381	0.1844	0.4174	0.2771	0.0328	0.0433	0.2091	0.0702	0.114	0.0104	0.3275	0.3324	0.2175	0.0122	0.4717	0.2694	0.0136	0.4008	0.0791	0.379	0.0665	0.0102	0.0204	0.439	0.0724	0.0382	0.0584	0.4283	0.3567	0.1743	0.0396	0.3631	0.3983	0.1459	0.1641	0.4967	0.2987	0.3826	0.3789	0.0007	0.4905	0.3073	0.3422	0.4173	0.3791	0.4448
f-cup	0.334	0.2077	0.2277	0.1445	0.4357	0.2361	0.1687	0.1707	0.2069	0.0974	0.1678	0.2146	0.0644	0.386	0.0975	0.3028	0.3893	0.2458	0.3434	0.1126	0.4595	0.2927	0.0514	0.3338	0.2896	0.2708	0.194	0.3754	0.1863	0.2945	0.0578	0.0411	0.1266	0.3244	0.1345	0.3695	0.0374	0.0427	0.3805	0.0351	0.4141	0.3021	0.2855	0.1327	0.3944	0.3886	0.3621	0.0049	0.199
CG9034	0.3132	0.4342	0.1467	0.1188	0.3456	0.2687	0.1538	0.1329	0.4289	0.3062	0.3942	0.1981	0.3902	0.0347	0.3337	0.1124	0.4354	0.3823	0.195	0.3696	0.2578	0.4395	0.4197	0.5206	0.2297	0.3835	0.4815	0.2762	0.3808	0.455	0.3147	0.0884	0.1784	0.2691	0.2708	0.2644	0.0722	0.0324	0.2334	0.255	0.396	0.3688	0.3936	0.4773	0.2311	0.0532	0.0739	0.2519	0.4496
SLC5A11	0.1618	0.1163	0.1815	0.2049	0.3295	0.3642	0.3144	0.1005	0.0097	0.0785	0.5491	0.2146	0.061	0.1731	0.2413	0.3322	0.0231	0.2065	0.2711	0.0648	0.2403	0.0589	0.1523	0.0842	0.009	0.2335	0.1977	0.3475	0.0201	0.0135	0.3865	0.1095	0.27	0.5103	0.3311	0.4482	0.1023	0.5144	0.4921	0.3054	0.1401	0.4838	0.1811	0.4238	0.3433	0.2511	0.2744	0.3364	0.319
CG5590	0.1202	0.1058	0.4743	0.2529	0.005	0.0186	0.3863	0.496	0.1731	0.0931	0.1132	0.0966	0.4816	0.1932	0.1446	0.0606	0.404	0.11	0.1391	0.3091	0.0869	0.0632	0.0669	0.2531	0.3729	0.0897	0.0389	0.0174	0.2013	0.3225	0.114	0.0862	0.1506	0.0234	0.495	0.0677	0.1287	0.1892	0.3039	0.3593	0.0866	0.0458	0.0682	0.1846	0.2641	0.2488	0.4662	0.2319	0.2891
CG1142	0.1154	0.0998	0.1466	0.453	0.2625	0.3263	0.4533	0.0728	0.0805	0.0967	0.3583	0.3231	0.0823	0.4751	0.1469	0.2091	0.3081	0.3662	0.3867	0.0582	0.1366	0.1901	0.4372	0.2538	0.1188	0.0277	0.2942	0.0963	0.0966	0.064	0.1647	0.4605	0.3783	0.1179	0.2326	0.3513	0.2289	0.1788	0.1821	0.1546	0.0712	0.0344	0.0639	0.281	0.0913	0.4254	0.0284	0.4146	0.3438
poe	0.0744	0.1479	0.358	0.3849	0.2869	0.3533	0.0169	0.3486	0.2114	0.2594	0.3953	0.0945	0.2657	0.084	0.3442	0.088	0.4345	0.0307	0.38	0.3069	0.0336	0.0528	0.1797	0.422	0.3304	0.4974	0.175	0.1006	0.1803	0.3768	0.152	0.4709	0.1061	0.2956	0.2423	0.0208	0.445	0.1671	0.1116	0.4036	0.2983	0.3271	0.373	0.1732	0.0928	0.0381	0.1368	0.2866	0.0544
B52	0.1663	0.3033	0.2666	0.1462	0.2646	0.4282	0.2883	0.3427	0.2085	0.2506	0.4476	0.2268	0.1736	0.2821	0.311	0.4596	0.1921	0.4608	0.322	0.208	0.0969	0.0874	0.3443	0.4332	0.088	0.0068	0.4698	0.2306	0.2332	0.2652	0.3112	0.1637	0.0321	0.0566	0.1761	0.1567	0.404	0.0068	0.1439	0.4293	0.2843	0.1649	0.0435	0.3945	0.0433	0.208	0.4032	0.4178	0.4593
CG5989	0.0536	0.3392	0.456	0.26	0.4913	0.4174	0.0396	0.136	0.4847	0.4417	0.122	0.3386	0.3522	0.0289	0.4788	0.1265	0.2008	0.2897	0.1832	0.2589	0.0738	0.4523	0.38	0.3595	0.5048	0.2277	0.3773	0.3326	0.4723	0.4778	0.3665	0.1017	0.2276	0.358	0.3771	0.1015	0.0556	0.0339	0.1038	0.2982	0.2575	0.2187	0.3568	0.3479	0.1289	0.0446	0.4063	0.2002	0.3678
GstE13	0.0129	0.0132	0.3398	0.4586	0.1131	0.0102	0.4126	0.377	0.0321	0.0052	0.1811	0.1128	0.0685	0.4871	0.0025	0.1343	0.2853	0.1588	0.4079	0.125	0.0102	0.0485	0.0593	0.2732	0.0291	0.4311	0.0044	0.3942	0.0374	0.1198	0.1387	0.1972	0.2465	0.4234	0.4233	0.0927	0.1213	0.4455	0.0169	0.0132	0.0026	0.4106	0.4283	0.0265	0.0057	0.0895	0.1834	0.1626	0.3842
GstT3	0.4295	0.4112	0.1101	0.296	0.1449	0.1118	0.3322	0.0518	0.0982	0.3736	0.4162	0.2331	0.1901	0.3057	0.2437	0.0804	0.1705	0.4628	0.3038	0.1505	0.2804	0.3584	0.4509	0.0067	0.1955	0.1236	0.4058	0.1233	0.107	0.016	0.0733	0.3393	0.3728	0.2	0.2046	0.1197	0.2634	0.2959	0.1063	0.3193	0.3972	0.129	0.0612	0.1842	0.183	0.0655	0.2698	0.205	0.4808
LysD	0.2341	0.4172	0.0563	0.0881	0.1054	0.1769	0.3633	0.1478	0.4146	0.4985	0.1877	0.1665	0.1915	0.3253	0.4885	0.0433	0.2771	0.384	0.348	0.2178	0.1872	0.275	0.3365	0.077	0.3328	0.3385	0.4001	0.0427	0.3675	0.364	0.48	0.1719	0.0065	0.3803	0.107	0.132	0.2447	0.1933	0.3528	0.2731	0.311	0.1362	0.3391	0.4138	0.2617	0.1359	0.4959	0.1508	0.1595
mv	0.2207	0.2592	0.2066	0.4892	0.1096	0.3713	0.4477	0.0696	0.126	0.2988	0.4188	0.23	0.1041	0.2926	0.3698	0.1712	0.3925	0.4007	0.5114	0.0821	0.2524	0.2894	0.3762	0.1455	0.1798	0.0038	0.4685	0.1015	0.1563	0.0715	0.0809	0.3113	0.4128	0.0946	0.3128	0.4403	0.5422	0.0552	0.2808	0.3436	0.2681	0.0224	0.0379	0.4413	0.1586	0.3968	0.1214	0.4417	0.2609
Lrpprc2	0.0039	0.0025	0.0981	0.1769	0.26	0.0956	0.1294	0.2277	0.0712	0.0102	0.1184	0.4322	0.109	0.1823	0.0258	0.307	0.3472	0.0039	0.4259	0.1044	0.0018	0.0221	0.0749	0.3706	0.2088	0.252	0.0296	0.4403	0.074	0.124	0.3739	0.1928	0.3321	0.354	0.5066	0.0192	0.1934	0.3339	0.0296	0.1066	0.012	0.1763	0.4939	0.0196	0.0171	0.1339	0.138	0.1394	0.0146
CG31324	0.2541	0.1276	0.1004	0.1302	0.0922	0.1222	0.466	0.3741	0.4557	0.1608	0.1556	0.416	0.4369	0.2424	0.0851	0.1449	0.0807	0.1075	0.1702	0.4597	0.276	0.4089	0.0225	0.2458	0.3668	0.0216	0.039	0.1939	0.4043	0.4991	0.0292	0.0627	0.033	0.027	0.1103	0.3599	0.2958	0.0113	0.1665	0.0733	0.1574	0.24	0.0058	0.0296	0.323	0.1729	0.4089	0.0803	0.2709
Clk	0.1255	0.0049	0.0321	0.1012	0.1709	0.0321	0.2722	0.134	0.0168	0.0037	0.2588	0.3378	0.0279	0.4687	0.0031	0.4014	0.4707	0.0589	0.4593	0.0453	0.1212	0.1648	0.0021	0.3974	0.1069	0.4013	0.0051	0.5098	0.0166	0.0495	0.0906	0.0068	0.2029	0.247	0.1809	0.3305	0.0084	0.0742	0.135	0.0027	0.0134	0.4454	0.2733	0.0118	0.1315	0.3548	0.163	0.0243	0.1816
Spp	0.4019	0.1603	0.2794	0.262	0.4049	0.1722	0.3661	0.1543	0.239	0.0406	0.2388	0.2693	0.0667	0.3626	0.0323	0.2934	0.4701	0.2316	0.2587	0.1115	0.2897	0.1491	0.1362	0.459	0.3287	0.3648	0.2321	0.1498	0.225	0.4067	0.135	0.1652	0.2522	0.4302	0.4278	0.3839	0.1223	0.2213	0.152	0.0085	0.3297	0.3447	0.4894	0.054	0.1339	0.4126	0.4583	0.0032	0.1351
Uck	0.0183	0.0174	0.2177	0.3182	0.4268	0.1064	0.1587	0.2712	0.1394	0.0126	0.2418	0.4005	0.096	0.1598	0.0219	0.4178	0.359	0.0597	0.2758	0.0877	0.0067	0.0256	0.1741	0.4848	0.2651	0.1028	0.1017	0.3423	0.1451	0.2571	0.3901	0.3227	0.2943	0.404	0.3016	0.0253	0.2589	0.259	0.0084	0.0685	0.0461	0.1134	0.3105	0.0246	0.0009	0.1363	0.1595	0.0911	0.0666
Vm34Ca	0.0675	0.2507	0.1931	0.1963	0.1048	0.1087	0.1382	0.0044	0.5584	0.267	0.1528	0.1471	0.4297	0.1077	0.1863	0.0051	0.3063	0.2036	0.3197	0.2689	0.0367	0.2342	0.2242	0.0616	0.3631	0.3328	0.1047	0.0271	0.4436	0.4179	0.0786	0.3159	0.1467	0.2848	0.4665	0.0303	0.2282	0.3066	0.0308	0.3871	0.1754	0.163	0.1779	0.1049	0.054	0.0016	0.2927	0.4813	0.5293
Cp7Fc	0.1411	0.3777	0.2857	0.2801	0.4956	0.4696	0.0329	0.0536	0.3793	0.4693	0.3734	0.3686	0.4648	0.0013	0.4424	0.0582	0.1535	0.1788	0.2037	0.2801	0.0994	0.3757	0.4304	0.2697	0.4621	0.4213	0.3427	0.2583	0.4283	0.3178	0.1791	0.1612	0.3297	0.4689	0.3519	0.0812	0.0848	0.1303	0.0442	0.4123	0.4816	0.4843	0.4231	0.1822	0.086	0.004	0.1664	0.4786	0.2243
Qsox1	0.4424	0.3867	0.1747	0.1247	0.2481	0.1009	0.2042	0.112	0.1962	0.3397	0.4931	0.236	0.3503	0.4271	0.1559	0.1212	0.3778	0.2847	0.4011	0.1891	0.4338	0.4217	0.4019	0.0103	0.4607	0.1419	0.3191	0.3044	0.2045	0.1137	0.0706	0.347	0.4356	0.4459	0.2859	0.4081	0.3373	0.215	0.1457	0.123	0.4995	0.1238	0.1334	0.2026	0.2165	0.1205	0.4095	0.2995	0.1412
CG3224	0.076	0.011	0.2875	0.1821	0.0473	0.0022	0.4653	0.3265	0.1235	0.002	0.2708	0.1395	0.1142	0.4132	0.0008	0.2576	0.4726	0.1019	0.1392	0.0674	0.0365	0.032	0.027	0.2434	0.2758	0.343	0.0128	0.3684	0.1315	0.401	0.0602	0.0308	0.442	0.1231	0.4225	0.0756	0.0095	0.1281	0.032	0.0068	0.0278	0.3296	0.1502	0.0074	0.0223	0.2097	0.2692	0.004	0.1984
Cp15	0.3559	0.1732	0.0241	0.0841	0.2428	0.3391	0.1709	0.0988	0.0917	0.25	0.19	0.2377	0.3095	0.0628	0.348	0.2631	0.3374	0.3828	0.4634	0.1622	0.4529	0.4623	0.1888	0.1692	0.3216	0.3107	0.2003	0.4559	0.1152	0.0515	0.3025	0.0387	0.2254	0.2061	0.3271	0.2543	0.0716	0.1144	0.1989	0.3155	0.1046	0.4496	0.3675	0.4993	0.2361	0.09	0.057	0.5006	0.4759
yellow-g	0.1922	0.4882	0.2546	0.1378	0.3523	0.3616	0.0709	0.0341	0.3868	0.3695	0.3849	0.4456	0.4461	0.0032	0.4668	0.1024	0.2164	0.356	0.1484	0.2432	0.1501	0.484	0.3826	0.2883	0.4582	0.3004	0.4621	0.3847	0.4253	0.3762	0.3653	0.0628	0.2864	0.2895	0.476	0.1473	0.0222	0.047	0.073	0.3588	0.5085	0.3827	0.4376	0.296	0.1028	0.0192	0.2454	0.3163	0.4071
CR41590	0.0108	0.0243	0.2153	0.4482	0.1899	0.0922	0.0891	0.3147	0.1599	0.0638	0.1041	0.4339	0.2352	0.0151	0.0449	0.1084	0.1376	0.0086	0.2438	0.2673	0.0032	0.1379	0.1076	0.3478	0.3195	0.4216	0.0255	0.1993	0.1585	0.2003	0.2196	0.3928	0.4073	0.2671	0.4507	0.0063	0.5323	0.3238	0.0055	0.1701	0.0457	0.3174	0.2644	0.0156	0.0065	0.0054	0.2883	0.2426	0.0512
CG8475	0.1639	0.0249	0.0575	0.0975	0.4969	0.176	0.4211	0.0235	0.05	0.0103	0.4116	0.4045	0.0304	0.3099	0.0424	0.138	0.2693	0.1358	0.1476	0.0074	0.1729	0.0342	0.1386	0.1499	0.1336	0.103	0.1423	0.0986	0.0528	0.0819	0.4209	0.0693	0.4742	0.4101	0.4755	0.3482	0.0351	0.4354	0.2519	0.0545	0.0803	0.1076	0.181	0.1519	0.1741	0.3151	0.087	0.0722	0.1065
CG40439	0.3048	0.4267	0.3899	0.1985	0.08	0.2181	0.3671	0.3855	0.3127	0.3907	0.4117	0.1096	0.4228	0.177	0.4258	0.2553	0.3584	0.2573	0.2551	0.3443	0.3946	0.3458	0.0946	0.51	0.4953	0.0243	0.2745	0.111	0.2955	0.5199	0.0331	0.0777	0.4731	0.0632	0.1333	0.4997	0.1538	0.0348	0.2846	0.4534	0.4762	0.0126	0.0688	0.3962	0.2756	0.4907	0.1184	0.1598	0.3852
wnd	0.1229	0.0006	0.027	0.0111	0.1597	0.0562	0.4893	0.1042	0.0152	0.0021	0.2405	0.2846	0.0498	0.2833	0.0275	0.4747	0.3324	0.0068	0.2456	0.0299	0.1313	0.0271	0.0022	0.1747	0.1405	0.3564	0.0128	0.391	0.0171	0.053	0.3042	0.0036	0.4626	0.166	0.2467	0.2719	0.0106	0.1985	0.2565	0.0664	0.027	0.5278	0.3028	0.0862	0.234	0.4655	0.172	0.0521	0.0375
Sf3b3	0.0356	0.1607	0.4696	0.3056	0.3111	0.2498	0.0019	0.2724	0.4177	0.2104	0.1938	0.4836	0.4339	0.0455	0.2315	0.1905	0.065	0.0527	0.2687	0.491	0.0162	0.0921	0.3684	0.244	0.1993	0.4244	0.2767	0.3111	0.4191	0.2485	0.3071	0.4217	0.2435	0.3219	0.2707	0.0011	0.3344	0.2326	0.0208	0.4594	0.2868	0.3088	0.3922	0.0864	0.0349	0.0476	0.4869	0.1672	0.0258
eIF4EHP	0.4361	0.4798	0.2527	0.5086	0.0885	0.261	0.3556	0.0091	0.2001	0.4114	0.2793	0.2061	0.1745	0.3782	0.4884	0.0215	0.2242	0.3083	0.278	0.0696	0.4263	0.3429	0.2088	0.0733	0.2524	0.0247	0.2873	0.0501	0.2657	0.1103	0.0109	0.3421	0.3872	0.0919	0.2098	0.3377	0.3989	0.1152	0.3354	0.4647	0.4761	0.0304	0.017	0.2907	0.4739	0.1536	0.0938	0.3538	0.5454
NT5E-2	0.1828	0.0242	0.0157	0.0033	0.1607	0.171	0.3615	0.1164	0.0309	0.0385	0.2517	0.3427	0.0942	0.2104	0.1162	0.4535	0.3158	0.0206	0.4321	0.0873	0.2335	0.1409	0.003	0.1259	0.1685	0.2204	0.0323	0.315	0.0325	0.0469	0.3396	0.0021	0.3172	0.1434	0.1275	0.4938	0.0163	0.1238	0.5388	0.1492	0.0682	0.3508	0.2192	0.1833	0.4089	0.3247	0.2235	0.1274	0.0875
CG17904	0.0126	0.0002	0.1689	0.1401	0.1265	0.0175	0.308	0.3562	0.0471	0.0007	0.2429	0.1901	0.0434	0.2427	0.0016	0.2002	0.3407	0.0109	0.3056	0.0424	0.0057	0.0281	0.01	0.3709	0.2142	0.5391	0.0049	0.4113	0.0443	0.2356	0.0476	0.0525	0.4906	0.2189	0.3541	0.0386	0.0416	0.2477	0.0019	0.0078	0.0116	0.4949	0.2519	0.0003	0.0033	0.0895	0.3121	0.0039	0.053
Gs1l	0.3552	0.2405	0.1025	0.1254	0.3708	0.1656	0.1801	0.4088	0.1674	0.428	0.4568	0.3344	0.2576	0.1012	0.3509	0.4696	0.2871	0.0957	0.1073	0.3317	0.4399	0.4262	0.1852	0.0505	0.4389	0.3945	0.3043	0.4651	0.1193	0.0922	0.3906	0.2709	0.1855	0.4075	0.0063	0.4745	0.5043	0.4685	0.4691	0.3617	0.4182	0.3601	0.5243	0.3739	0.3825	0.4102	0.283	0.472	0.0871
Gapdh2	0.0202	0.0217	0.3203	0.4828	0.1029	0.0282	0.4464	0.4218	0.086	0.0224	0.1666	0.1397	0.107	0.1948	0.0098	0.0366	0.4886	0.0781	0.2858	0.2738	0.012	0.1319	0.0214	0.2424	0.0591	0.39	0.0021	0.2152	0.0727	0.1822	0.0344	0.2294	0.4264	0.3021	0.298	0.0841	0.2657	0.3925	0.0065	0.0288	0.0124	0.2847	0.2127	0.0086	0.0105	0.017	0.3841	0.1609	0.2983
PAN3	0.4196	0.4388	0.3448	0.3884	0.152	0.4222	0.3045	0.2121	0.5145	0.2626	0.25	0.4433	0.2532	0.4	0.3459	0.158	0.3569	0.5339	0.0905	0.1341	0.255	0.1016	0.2381	0.4492	0.4184	0.0579	0.3014	0.131	0.5323	0.3737	0.2134	0.2607	0.1177	0.1099	0.0726	0.2196	0.5328	0.0668	0.2483	0.382	0.4446	0.0927	0.0647	0.4516	0.0937	0.464	0.3639	0.2991	0.2589
Dpm1	0.054	0.0057	0.033	0.0905	0.2123	0.026	0.4037	0.332	0.1805	0.0052	0.1574	0.449	0.1317	0.2119	0.0017	0.3486	0.1488	0.02	0.4398	0.1718	0.0502	0.184	0.0165	0.3822	0.3902	0.4105	0.016	0.5192	0.1663	0.2714	0.1082	0.0585	0.157	0.2543	0.356	0.1294	0.1191	0.1214	0.0243	0.0048	0.0312	0.3466	0.2645	0	0.0477	0.1743	0.133	0.0077	0.0472
CG43679	0.1333	0.2896	0.377	0.3258	0.0234	0.1596	0.1341	0.0046	0.2811	0.4428	0.0173	0.3315	0.0651	0.2395	0.3364	0.0354	0.0174	0.1717	0.2502	0.0489	0.1605	0.3938	0.2159	0.0505	0.1227	0.0613	0.1297	0.0237	0.2654	0.2321	0.1894	0.3726	0.3668	0.0161	0.4725	0.1098	0.28	0.189	0.1877	0.4585	0.194	0.2047	0.016	0.1711	0.3605	0.0814	0.3825	0.4889	0.4305
CG31869	0.0218	0.0754	0.4478	0.4866	0.0047	0.0066	0.2303	0.2074	0.273	0.0859	0.0987	0.0985	0.3804	0.2692	0.0675	0.0078	0.3968	0.042	0.4387	0.4484	0.0133	0.1025	0.04	0.1368	0.2279	0.1186	0.0163	0.0058	0.2506	0.3802	0.0237	0.2667	0.2256	0.0791	0.3531	0.0242	0.3827	0.3701	0.0409	0.2097	0.0584	0.0838	0.0434	0.0437	0.0589	0.02	0.4306	0.2449	0.3522
CG15570	0.1648	0.4653	0.1021	0.0931	0.4066	0.3874	0.0797	0.0177	0.2054	0.438	0.3289	0.2697	0.3044	0.0181	0.4305	0.0209	0.2298	0.3637	0.2579	0.1237	0.1044	0.398	0.4244	0.0871	0.4724	0.4425	0.4032	0.1818	0.244	0.1476	0.2117	0.0692	0.1771	0.4666	0.3822	0.0727	0.0507	0.1169	0.0478	0.4099	0.518	0.3697	0.3371	0.2481	0.072	0.0007	0.2088	0.4086	0.4656
Vha36-1	0.021	0.0355	0.3283	0.285	0.4731	0.1582	0.0845	0.3366	0.185	0.0377	0.3437	0.3769	0.1187	0.1517	0.0632	0.4744	0.3655	0.0643	0.1576	0.0642	0.0069	0.0126	0.2455	0.4802	0.3367	0.1282	0.1643	0.3626	0.197	0.3888	0.4075	0.3784	0.2071	0.39	0.2645	0.0214	0.3221	0.1837	0.009	0.1418	0.1116	0.1384	0.2992	0.046	0.0017	0.1534	0.2682	0.0872	0.0391
Tapdelta	0.0956	0.0184	0.1226	0.3463	0.4434	0.162	0.4574	0.1035	0.0163	0.0099	0.4083	0.3465	0.0066	0.3309	0.0184	0.4078	0.3078	0.1332	0.4577	0.0123	0.0623	0.0643	0.1128	0.2756	0.042	0.0487	0.071	0.1495	0.0171	0.0397	0.3793	0.198	0.448	0.2626	0.4591	0.2344	0.104	0.369	0.0606	0.0233	0.0405	0.1387	0.1838	0.0547	0.0325	0.2927	0.1414	0.1173	0.1846
Myc	0.3425	0.1389	0.3169	0.4247	0.2877	0.1517	0.4345	0.1801	0.054	0.0704	0.2132	0.0013	0.0345	0.2816	0.1497	0.3894	0.0472	0.159	0.0578	0.034	0.2044	0.0028	0.1087	0.2683	0.0306	0.3696	0.1612	0.321	0.0419	0.1812	0.127	0.1537	0.0979	0.3753	0.3198	0.2199	0.068	0.4533	0.3467	0.2189	0.2789	0.1881	0.5699	0.2464	0.1733	0.3796	0.2192	0.1108	0.2352
GatA	0.0274	0.0034	0.3057	0.1834	0.0472	0.0197	0.3616	0.1991	0.0034	0.0059	0.2515	0.0444	0.0429	0.4166	0.0207	0.1553	0.2685	0.0218	0.1781	0.0188	0.0121	0.0024	0.0143	0.4527	0.0759	0.4006	0.0104	0.195	0.005	0.0578	0.0912	0.0396	0.1801	0.1533	0.3496	0.0501	0.0143	0.3605	0.1018	0.0855	0.0119	0.2478	0.2908	0.0388	0.0462	0.1752	0.3896	0.0705	0.131
psd	0.0403	0.1797	0.4606	0.322	0.1019	0.0799	0.1502	0.0026	0.4612	0.2582	0.0442	0.4136	0.3317	0.0559	0.1397	0.0049	0.1005	0.1824	0.1724	0.149	0.0372	0.4118	0.224	0.0163	0.4775	0.2147	0.073	0.1172	0.4658	0.3718	0.1298	0.3717	0.3786	0.2062	0.4285	0.0331	0.172	0.4552	0.02	0.2825	0.1058	0.2829	0.1516	0.052	0.0528	0.0015	0.3889	0.4778	0.4832
CG4839	0.4123	0.1201	0.0018	0.0551	0.4662	0.4921	0.2555	0.1376	0.0795	0.2522	0.3437	0.2262	0.1459	0.4833	0.2603	0.3145	0.3817	0.1871	0.116	0.1776	0.453	0.3158	0.0571	0.1092	0.3192	0.4345	0.1181	0.3743	0.0679	0.0332	0.3523	0.031	0.0156	0.3232	0.0272	0.2036	0.0885	0.0757	0.442	0.1506	0.1652	0.3897	0.381	0.2362	0.3442	0.2828	0.245	0.2562	0.2497
CG7630	0.1975	0.4382	0.3005	0.2041	0.2166	0.2905	0.1428	0.5078	0.273	0.4467	0.5066	0.4211	0.3563	0.2363	0.3482	0.4625	0.2636	0.414	0.4608	0.3833	0.1846	0.2247	0.226	0.2764	0.2024	0.0945	0.3723	0.3073	0.3033	0.2427	0.158	0.1179	0.0318	0.135	0.2986	0.2226	0.2292	0.0014	0.3664	0.2097	0.4251	0.1749	0.0771	0.3423	0.2211	0.2985	0.4944	0.1549	0.3759
CG10669	0.1616	0.0062	0.0211	0.0064	0.1321	0.0763	0.4543	0.1223	0.0829	0.0173	0.2449	0.4921	0.1148	0.4738	0.0288	0.4742	0.26	0.0171	0.2985	0.0436	0.1547	0.1363	0.0072	0.3749	0.4789	0.3361	0.0266	0.4593	0.0793	0.2043	0.1129	0.0008	0.1535	0.0592	0.2033	0.2214	0.0014	0.0311	0.2051	0.0362	0.0636	0.4939	0.1587	0.0189	0.2289	0.4762	0.218	0.0016	0.0199
Fatp3	0.4325	0.3003	0.3529	0.3355	0.4676	0.2277	0.4732	0.2921	0.4882	0.1946	0.2834	0.0933	0.1543	0.0846	0.1053	0.1522	0.4094	0.2528	0.3367	0.459	0.2486	0.313	0.1322	0.2173	0.2413	0.438	0.1734	0.437	0.3911	0.3668	0.0095	0.4588	0.3714	0.4549	0.2104	0.2725	0.4868	0.3622	0.0449	0.0753	0.4567	0.2647	0.3243	0.0484	0.0793	0.0454	0.1408	0.0783	0.3083
zetaCOP	0.09	0.0049	0.0037	0.0074	0.2901	0.1522	0.3585	0.082	0.0399	0.0108	0.1823	0.3684	0.0698	0.4414	0.0333	0.3403	0.3299	0.0081	0.4103	0.0261	0.1004	0.1118	0.0245	0.1683	0.323	0.4102	0.0409	0.3927	0.0416	0.0635	0.3798	0.017	0.2327	0.2682	0.2806	0.2214	0.0396	0.2207	0.1746	0.0537	0.0277	0.1654	0.4136	0.0384	0.1591	0.4833	0.082	0.0385	0.0072
CG10514	0.5487	0.1091	0.0547	0.0018	0.2228	0.3064	0.2672	0.0689	0.099	0.1136	0.5095	0.3322	0.1214	0.0973	0.2371	0.1983	0.284	0.1229	0.1929	0.0725	0.4873	0.2019	0.039	0.0994	0.3017	0.192	0.1738	0.5652	0.0955	0.1105	0.3539	0.0012	0.2428	0.1505	0.1418	0.3686	0.0055	0.0533	0.2686	0.212	0.2171	0.3055	0.2351	0.3134	0.3514	0.0894	0.3482	0.0795	0.1129
CG3862	0.0148	0.012	0.2645	0.4558	0.0353	0.0009	0.4245	0.3951	0.1247	0.0043	0.0546	0.2527	0.2113	0.455	0.0009	0.071	0.4517	0.1366	0.4782	0.2826	0.0121	0.1179	0.0327	0.1124	0.1305	0.2417	0	0.1973	0.1335	0.2314	0.0867	0.1556	0.4373	0.1773	0.4298	0.084	0.158	0.2345	0.0124	0.0064	0.0008	0.3168	0.1457	0.0105	0.0104	0.0651	0.1358	0.1336	0.3718
Rpb8	0.0911	0.0088	0.0075	0.0343	0.439	0.259	0.3252	0.105	0.0355	0.0188	0.2316	0.3689	0.0417	0.296	0.0499	0.3321	0.3546	0.0135	0.4763	0.0216	0.0905	0.1256	0.0489	0.1244	0.2393	0.1584	0.0615	0.2286	0.0299	0.0428	0.4289	0.0661	0.27	0.3942	0.2633	0.2395	0.079	0.4044	0.1327	0.0652	0.0365	0.0688	0.394	0.0482	0.1113	0.4552	0.1031	0.0716	0.0105
mRpL9	0.1075	0.007	0.0022	0.0093	0.1903	0.0832	0.4741	0.1005	0.0718	0.0117	0.1407	0.328	0.1216	0.4278	0.0224	0.3829	0.2839	0.0378	0.4187	0.061	0.1445	0.1972	0.0204	0.311	0.3975	0.4244	0.0262	0.4636	0.0709	0.1008	0.2959	0.0053	0.1389	0.1917	0.3045	0.2915	0.0134	0.0684	0.2091	0.0274	0.0217	0.3107	0.3098	0.0318	0.2198	0.4425	0.0557	0.0297	0.0647
Sirup	0.3371	0.4608	0.4735	0.4251	0.0757	0.2769	0.4313	0.0039	0.2464	0.4046	0.1579	0.4312	0.1139	0.4287	0.4838	0.0358	0.1329	0.3661	0.1821	0.0376	0.4514	0.2054	0.1952	0.0892	0.2113	0.0267	0.2281	0.0829	0.2792	0.2237	0.0612	0.295	0.1955	0.067	0.208	0.4566	0.3989	0.0551	0.376	0.4912	0.3691	0.0871	0.0097	0.2952	0.3738	0.2106	0.3556	0.4921	0.3439
Iml1	0.1487	0.0367	0.0167	0.0571	0.5229	0.3888	0.43	0.0497	0.038	0.0398	0.3508	0.5344	0.0535	0.2745	0.1612	0.1186	0.2552	0.1151	0.307	0.0338	0.1955	0.0963	0.1465	0.0643	0.1309	0.0259	0.1791	0.1023	0.0465	0.0349	0.3208	0.0803	0.4868	0.4555	0.3578	0.5058	0.0842	0.4441	0.3882	0.1899	0.108	0.1093	0.0938	0.2674	0.3007	0.2164	0.1081	0.2042	0.0997
Cp18	0.2714	0.4831	0.1178	0.1279	0.2198	0.4001	0.1143	0.1857	0.3683	0.4918	0.3264	0.2389	0.3631	0.0209	0.4453	0.2647	0.4222	0.4265	0.526	0.4662	0.1647	0.2314	0.3089	0.3092	0.3973	0.0971	0.4143	0.4505	0.4149	0.246	0.3898	0.053	0.1417	0.1147	0.3148	0.1108	0.0956	0.0214	0.0897	0.4596	0.3796	0.3177	0.2129	0.31	0.0609	0.052	0.1932	0.4712	0.3539
fabp	0.3896	0.5085	0.4973	0.3584	0.137	0.4492	0.3928	0.4306	0.2694	0.3069	0.1928	0.4608	0.2717	0.2216	0.2049	0.2406	0.3399	0.3378	0.4703	0.3473	0.4788	0.5078	0.4217	0.2922	0.4491	0.1189	0.4211	0.0618	0.3234	0.1984	0.4131	0.3917	0.2578	0.0951	0.2966	0.4725	0.5417	0.4836	0.1612	0.0898	0.3801	0.1241	0.2056	0.2239	0.1771	0.3981	0.4281	0.1103	0.4539
Drep4	0.4204	0.4497	0.379	0.0922	0.1449	0.3481	0.1688	0.257	0.4616	0.2934	0.2686	0.5131	0.2309	0.3782	0.2655	0.2061	0.1613	0.111	0.316	0.2974	0.4738	0.348	0.2159	0.3781	0.137	0.1123	0.355	0.0884	0.5098	0.4562	0.186	0.2224	0.2742	0.0462	0.0565	0.4173	0.5188	0.1692	0.3304	0.1967	0.4389	0.136	0.0805	0.4696	0.1698	0.3829	0.1521	0.446	0.1347
Archease	0.3804	0.2913	0.0658	0.3532	0.408	0.3172	0.0454	0.316	0.3393	0.2228	0.5153	0.2615	0.1911	0.4615	0.1295	0.3028	0.4385	0.4746	0.1072	0.3798	0.3359	0.21	0.1602	0.5014	0.2855	0.4155	0.2034	0.2032	0.3049	0.2455	0.3006	0.1496	0.0119	0.3732	0.2235	0.1176	0.1652	0.0502	0.4351	0.0222	0.2612	0.3503	0.4973	0.1982	0.506	0.3546	0.1712	0.2274	0.4332
yellow-g2	0.2881	0.4682	0.213	0.1387	0.2869	0.307	0.1061	0.0656	0.4639	0.3586	0.4493	0.3138	0.4289	0.0025	0.4361	0.133	0.3261	0.3516	0.1589	0.3399	0.2109	0.4652	0.4293	0.3863	0.3585	0.3313	0.5104	0.3911	0.5123	0.429	0.2856	0.0792	0.296	0.2502	0.3359	0.2032	0.0413	0.0543	0.1182	0.3694	0.4039	0.4645	0.4152	0.3136	0.1302	0.0265	0.128	0.3744	0.3878
Dph2	0.3351	0.4373	0.5012	0.2551	0.1434	0.4625	0.4682	0.078	0.2182	0.3448	0.4036	0.3963	0.2275	0.4132	0.454	0.1781	0.1465	0.3508	0.2657	0.1444	0.3145	0.222	0.1943	0.271	0.1395	0.0141	0.3362	0.1134	0.2838	0.1511	0.0455	0.2278	0.0983	0.0584	0.1061	0.4356	0.5386	0.0259	0.4615	0.4831	0.3382	0.0722	0.0134	0.329	0.2306	0.3339	0.1348	0.2657	0.4569
Idh3a	0.4404	0.3849	0.3059	0.2795	0.157	0.0882	0.1738	0.4162	0.3576	0.2513	0.379	0.4616	0.4813	0.382	0.1367	0.3603	0.2265	0.4966	0.4169	0.4411	0.4372	0.3387	0.1289	0.1231	0.3027	0.1274	0.1996	0.2647	0.3899	0.2351	0.0572	0.1311	0.0539	0.1521	0.3656	0.402	0.2031	0.0021	0.3217	0.0679	0.3827	0.1759	0.074	0.138	0.5288	0.4403	0.4283	0.0697	0.4013
spi	0.0901	0.1522	0.4671	0.165	0.4607	0.248	0.4966	0.3727	0.0745	0.1244	0.3506	0.2481	0.1146	0.4017	0.1485	0.3411	0.1237	0.4339	0.494	0.2114	0.0696	0.125	0.42	0.4714	0.0163	0.0338	0.1999	0.385	0.098	0.094	0.3882	0.3384	0.0878	0.1434	0.2761	0.212	0.4336	0.0655	0.1257	0.2367	0.083	0.2954	0.117	0.2826	0.0472	0.1829	0.2095	0.3918	0.4376
CG4020	0.345	0.4295	0.4753	0.4254	0.0547	0.0955	0.0659	0.4927	0.3747	0.2921	0.4516	0.1565	0.4552	0.0955	0.2324	0.212	0.2963	0.4644	0.4957	0.4865	0.3747	0.4577	0.1088	0.2448	0.3119	0.0018	0.1625	0.1219	0.3686	0.4466	0.0556	0.1006	0.3271	0.0838	0.2576	0.3352	0.1421	0.0111	0.3722	0.1912	0.3362	0.0089	0.0388	0.3531	0.3338	0.48	0.4119	0.2777	0.243
mRpS17	0.0849	0.0265	0.1537	0.4624	0.3114	0.1304	0.2722	0.2021	0.002	0.0309	0.2666	0.2437	0.0223	0.4785	0.0386	0.2838	0.1865	0.1835	0.2817	0.0872	0.091	0.1862	0.0519	0.3385	0.005	0.3513	0.0158	0.478	0.0019	0.0019	0.263	0.1623	0.4661	0.4536	0.2581	0.3634	0.1185	0.4809	0.1454	0.0432	0.0108	0.4957	0.4441	0.0944	0.0987	0.2398	0.1916	0.3276	0.433
LpR2	0.4989	0.2536	0.1231	0.2351	0.1113	0.2285	0.373	0.01	0.0831	0.3358	0.2648	0.4709	0.0631	0.2809	0.4815	0.0135	0.1161	0.4261	0.3561	0.0465	0.4555	0.2827	0.4747	0.0027	0.1258	0.0047	0.4938	0.0316	0.0825	0.0422	0.1281	0.2498	0.4528	0.0997	0.3427	0.2732	0.1248	0.2723	0.2344	0.4532	0.3138	0.0585	0.0006	0.3573	0.4528	0.0537	0.2742	0.5007	0.2641
CG14210	0.1275	0.0236	0.0699	0.2293	0.5069	0.1833	0.448	0.0486	0.031	0.0135	0.3142	0.4717	0.0369	0.3742	0.0504	0.2479	0.2471	0.1746	0.2786	0.0175	0.1092	0.0484	0.1892	0.171	0.0821	0.0436	0.1216	0.1108	0.0373	0.0422	0.344	0.1449	0.3813	0.3095	0.388	0.2885	0.0756	0.3954	0.2031	0.0746	0.0389	0.0748	0.109	0.1636	0.1061	0.4159	0.0484	0.1914	0.2075
scaf	0.1442	0.0217	0.0428	0.0042	0.0328	0.0934	0.3216	0.3474	0.1848	0.0619	0.1353	0.493	0.3072	0.5002	0.0784	0.3062	0.1589	0.0103	0.3909	0.2101	0.1741	0.2061	0.0061	0.4544	0.3572	0.0585	0.0243	0.1465	0.1653	0.3054	0.0804	0.0011	0.161	0.0024	0.1415	0.185	0.0308	0.0155	0.2771	0.1283	0.079	0.3006	0.0172	0.0369	0.3482	0.3849	0.3385	0.024	0.0333
tyn	0.2266	0.4725	0.3036	0.3893	0.2718	0.4993	0.4833	0.2609	0.4112	0.2887	0.018	0.0862	0.097	0.3649	0.3301	0.2846	0.3161	0.3219	0.1503	0.1526	0.4464	0.1633	0.3117	0.3333	0.3797	0.3897	0.4328	0.3071	0.3423	0.3998	0.1234	0.323	0.4866	0.3657	0.276	0.4404	0.2149	0.4331	0.3961	0.2472	0.1982	0.395	0.4117	0.2997	0.3337	0.4939	0.0697	0.0325	0.1535
CG7083	0.1516	0.0306	0.0124	0.0839	0.519	0.4752	0.5144	0.0951	0.0124	0.0826	0.2822	0.4695	0.0441	0.449	0.1882	0.3237	0.2921	0.0575	0.3924	0.0584	0.1908	0.1816	0.0933	0.0483	0.0882	0.1318	0.1074	0.2648	0.0127	0.001	0.3907	0.0911	0.4159	0.5162	0.1827	0.4838	0.116	0.4873	0.3432	0.2025	0.0647	0.149	0.2393	0.2442	0.3013	0.392	0.1514	0.3119	0.0809
Sod3	0.1855	0.0411	0.0372	0.1325	0.3883	0.32	0.4001	0.3294	0.1637	0.0839	0.4501	0.3496	0.0492	0.0635	0.0673	0.4316	0.1716	0.0708	0.2207	0.1223	0.1725	0.3385	0.0544	0.3167	0.3489	0.2841	0.0821	0.2364	0.1087	0.2111	0.1582	0.1348	0.0655	0.436	0.1175	0.3448	0.2081	0.2703	0.058	0.0318	0.158	0.1975	0.5202	0.0203	0.1139	0.2435	0.3656	0.0434	0.068
CG15279	0.3011	0.0657	0.0232	0.0015	0.1997	0.265	0.2793	0.0914	0.0711	0.0653	0.4125	0.3227	0.0878	0.1595	0.1686	0.2837	0.2953	0.0606	0.3292	0.0749	0.3911	0.176	0.0072	0.098	0.2118	0.1925	0.0941	0.5645	0.0661	0.0892	0.324	0	0.2341	0.1469	0.1043	0.3899	0.0066	0.0768	0.4057	0.1586	0.1596	0.3279	0.2363	0.2368	0.4709	0.1585	0.3101	0.086	0.0784
AnxB11	0.1837	0.2783	0.384	0.1172	0.0501	0.1339	0.1658	0.408	0.2968	0.2472	0.0696	0.3101	0.1828	0.2417	0.3255	0.4488	0.1697	0.2417	0.0642	0.4381	0.2163	0.1947	0.4127	0.232	0.0785	0.1672	0.3554	0.1558	0.2525	0.2168	0.4359	0.227	0.3444	0.0268	0.1131	0.0967	0.34	0.2518	0.4419	0.4797	0.2737	0.5151	0.1236	0.3418	0.4313	0.4366	0.1812	0.2516	0.2318
CG10560	0.5447	0.2456	0.4211	0.2318	0.2923	0.3069	0.2056	0.2305	0.0719	0.3764	0.1653	0.108	0.0304	0.1582	0.4925	0.5385	0.3735	0.0972	0.4345	0.0565	0.3743	0.1776	0.1628	0.025	0.2235	0.3733	0.3746	0.5163	0.0317	0.1445	0.1697	0.2665	0.4845	0.5673	0.0175	0.3481	0.2749	0.3444	0.4629	0.4903	0.3811	0.448	0.3129	0.321	0.419	0.3745	0.0439	0.1713	0.0873
QIL1	0.3787	0.4278	0.2296	0.2361	0.3366	0.1991	0.2281	0.3733	0.1721	0.3133	0.4068	0.2219	0.4547	0.3823	0.198	0.3289	0.1442	0.376	0.471	0.4927	0.3514	0.2721	0.3695	0.2014	0.1589	0.1425	0.4133	0.3213	0.2109	0.1477	0.3259	0.2075	0.0325	0.1979	0.3979	0.3546	0.1898	0.0116	0.3305	0.076	0.5615	0.4895	0.1393	0.2049	0.5467	0.3814	0.2586	0.0706	0.5615
Oamb	0.1948	0.1195	0.2436	0.408	0.2697	0.0317	0.4355	0.3766	0.4144	0.051	0.2838	0.4483	0.2659	0.1665	0.0064	0.2279	0.1564	0.2286	0.3395	0.3657	0.143	0.3852	0.0922	0.0966	0.4654	0.278	0.0763	0.5606	0.3876	0.4131	0.0516	0.2387	0.1515	0.3238	0.5007	0.229	0.2884	0.1328	0.0279	0.0022	0.1455	0.5289	0.2456	0.0043	0.0531	0.0919	0.2768	0.028	0.337
dind	0.0262	0.1348	0.2729	0.4314	0.2631	0.4274	0.0348	0.1914	0.2771	0.3805	0.0461	0.3226	0.4678	0.0279	0.3619	0.0828	0.1188	0.0748	0.1465	0.3697	0.0397	0.403	0.2715	0.4487	0.5058	0.4301	0.1411	0.1437	0.2965	0.2765	0.4205	0.4273	0.4136	0.2743	0.3666	0.0654	0.1954	0.2265	0.0848	0.4541	0.1147	0.3408	0.2778	0.1573	0.1416	0.0386	0.3641	0.3845	0.1756
htt	0.2984	0.2535	0.2123	0.3527	0.2433	0.4905	0.035	0.015	0.0935	0.1373	0.1008	0.2397	0.018	0.1355	0.2273	0.0362	0.028	0.4376	0.2982	0.0373	0.3675	0.2453	0.2546	0.0922	0.039	0.1748	0.3698	0.0132	0.0882	0.0922	0.4585	0.1318	0.4147	0.1723	0.3049	0.1926	0.0455	0.3595	0.3424	0.1016	0.3054	0.3775	0.0982	0.4439	0.5402	0.0745	0.3507	0.1956	0.5223
Stam	0.358	0.4259	0.3236	0.3706	0.0374	0.0993	0.4814	0.0077	0.0964	0.489	0.1172	0.4818	0.0654	0.4739	0.2961	0.0377	0.1114	0.4479	0.3295	0.0302	0.3768	0.2904	0.3445	0.0015	0.1787	0.0028	0.2478	0.0448	0.0943	0.052	0.1045	0.502	0.3587	0.0525	0.3616	0.2886	0.2845	0.0829	0.2493	0.3668	0.3889	0.0663	0.0002	0.2403	0.4174	0.1203	0.4891	0.44	0.2586
Rs1	0.0497	0.0323	0.0943	0.1432	0.2271	0.1592	0.1179	0.2374	0.3468	0.091	0.133	0.3834	0.3032	0.0201	0.0539	0.1803	0.019	0.0233	0.2591	0.3747	0.042	0.2891	0.0384	0.2911	0.3705	0.3068	0.0376	0.255	0.2978	0.4995	0.064	0.1968	0.1505	0.17	0.2343	0.067	0.3864	0.2645	0.0124	0.0789	0.1197	0.3712	0.1531	0.0026	0.0536	0.0375	0.413	0.0434	0.054
CG17333	0.0307	0.026	0.3365	0.2603	0.0444	0.0012	0.309	0.3988	0.3514	0.0055	0.129	0.265	0.3071	0.3306	0.0017	0.1242	0.2112	0.0789	0.2323	0.3068	0.0124	0.0575	0.0497	0.0883	0.4677	0.2802	0.0183	0.2407	0.3515	0.3991	0.0593	0.1427	0.4538	0.1263	0.3089	0.0204	0.1901	0.1973	0.0027	0.0162	0.0381	0.3901	0.1089	0.002	0.0075	0.0609	0.238	0.0192	0.1818
CG33170	0.2091	0.4984	0.4207	0.2707	0.2727	0.247	0.296	0.5362	0.1525	0.3908	0.384	0.4318	0.466	0.3864	0.2777	0.4957	0.2215	0.4145	0.397	0.4812	0.2846	0.3352	0.3285	0.2285	0.1476	0.1299	0.4576	0.3316	0.2248	0.0534	0.1113	0.1942	0.0851	0.1681	0.4411	0.3714	0.1786	0.007	0.3824	0.1684	0.3665	0.2017	0.1407	0.2202	0.4962	0.502	0.4506	0.0577	0.5076
Cp36	0.301	0.3402	0.0738	0.0563	0.4229	0.3757	0.1463	0.0234	0.2747	0.2867	0.4913	0.242	0.3793	0.0228	0.3849	0.0537	0.3818	0.4866	0.1804	0.1419	0.2411	0.4775	0.3374	0.1955	0.4021	0.4607	0.4585	0.2337	0.3161	0.2432	0.2693	0.0349	0.1938	0.3041	0.4726	0.2038	0.0239	0.0596	0.1456	0.2979	0.3581	0.3508	0.4991	0.4213	0.174	0.0123	0.1104	0.2574	0.4353
CG10365	0.1784	0.0608	0.1847	0.2322	0.2345	0.0617	0.1882	0.0723	0.0426	0.0054	0.4101	0.1999	0.0554	0.0867	0.049	0.3392	0.0716	0.2466	0.113	0.0395	0.2087	0.0344	0.0966	0.2339	0.0406	0.3202	0.1065	0.3194	0.0555	0.0772	0.4837	0.0586	0.3109	0.429	0.4992	0.4466	0.0157	0.3317	0.3678	0.0675	0.0796	0.5319	0.3609	0.2414	0.2543	0.3014	0.1571	0.156	0.3836
ics	0.0299	0.0133	0.1016	0.1511	0.3382	0.2691	0.2083	0.1127	0.0077	0.0582	0.1731	0.4279	0.0827	0.4626	0.1514	0.4945	0.3525	0.0339	0.3433	0.0353	0.0394	0.036	0.1328	0.1243	0.1354	0.2322	0.0862	0.5091	0.0127	0.0127	0.4042	0.1497	0.2466	0.4213	0.4184	0.1212	0.1364	0.2675	0.2149	0.2925	0.0249	0.2133	0.3174	0.1895	0.1263	0.3924	0.1461	0.3209	0.0712
Fnta	0.1163	0.0063	0.1626	0.0356	0.2119	0.0793	0.3282	0.0611	0.0282	0.001	0.4543	0.157	0.017	0.425	0.0309	0.4659	0.3593	0.0163	0.0743	0.0023	0.0642	0.0109	0.0197	0.2177	0.2138	0.5885	0.0494	0.4782	0.0177	0.0917	0.1671	0.0123	0.3818	0.2021	0.3083	0.1014	0.0014	0.2951	0.1894	0.0777	0.0765	0.4964	0.43	0.0416	0.1058	0.421	0.3934	0.0052	0.0158
CG42565	0.1088	0.1785	0.2763	0.3658	0.137	0.0976	0.2015	0.4688	0.4438	0.0703	0.4162	0.1148	0.4199	0.3982	0.1367	0.4389	0.4883	0.1812	0.0137	0.1723	0.0423	0.0096	0.3783	0.2484	0.5193	0.2951	0.328	0.3404	0.4934	0.2416	0.358	0.4362	0.0254	0.3307	0.0672	0.016	0.2457	0.3567	0.0855	0.3047	0.2291	0.5347	0.5579	0.2059	0.0208	0.3066	0.4131	0.1411	0.1514
TBC1D16	0.4348	0.311	0.1422	0.0566	0.3954	0.1198	0.1109	0.2151	0.223	0.3418	0.4561	0.2681	0.3998	0.3629	0.1706	0.2623	0.3825	0.1224	0.478	0.2517	0.4773	0.4549	0.392	0.0175	0.3459	0.4274	0.4591	0.4857	0.2142	0.1484	0.253	0.2504	0.3958	0.3643	0.1034	0.4941	0.3963	0.3677	0.2259	0.1282	0.487	0.2932	0.4001	0.3366	0.2083	0.2429	0.3998	0.4346	0.0505
Tpi	0.211	0.0468	0.1523	0.1273	0.0162	0.0194	0.2695	0.249	0.0764	0.0564	0.1943	0.1889	0.1874	0.1914	0.0692	0.1511	0.3347	0.0852	0.4967	0.2051	0.2237	0.2154	0.0016	0.4804	0.155	0.0704	0.0097	0.1462	0.0743	0.1286	0.0623	0.0096	0.3833	0.0456	0.1324	0.3591	0.0368	0.0343	0.372	0.0947	0.0464	0.0847	0.071	0.1179	0.3898	0.3984	0.3501	0.1449	0.381
Mpcp1	0.2351	0.1189	0.1681	0.2171	0.1463	0.0058	0.4302	0.4773	0.5179	0.0591	0.1926	0.4624	0.4056	0.368	0.0173	0.2782	0.0958	0.2187	0.4636	0.4052	0.1976	0.418	0.0666	0.0835	0.3325	0.2392	0.0719	0.3393	0.5246	0.3428	0.0674	0.1274	0.0997	0.1801	0.4633	0.2404	0.228	0.0301	0.0908	0.0166	0.1475	0.3661	0.1103	0.0143	0.1349	0.2052	0.2103	0.0183	0.3569
CG34117	0.0205	0.0158	0.4766	0.4701	0.0584	0.0062	0.4725	0.4187	0.0266	0.0045	0.2504	0.0238	0.0728	0.4706	0.0075	0.0942	0.2574	0.1154	0.2159	0.0924	0.0052	0.0123	0.0476	0.2618	0.0511	0.4551	0.0109	0.2283	0.0344	0.1911	0.0813	0.1604	0.129	0.2906	0.4361	0.0426	0.0869	0.442	0.0209	0.0447	0.0112	0.2389	0.3192	0.0266	0.0047	0.0826	0.3532	0.1026	0.2867
Las	0.0077	0.0537	0.4422	0.494	0.016	0.0304	0.4996	0.4965	0.031	0.0469	0.0518	0.1568	0.3017	0.2332	0.0664	0.1109	0.2354	0.2245	0.2583	0.2632	0.0201	0.0687	0.1494	0.2893	0.1064	0.5002	0.0284	0.1121	0.0802	0.1137	0.3439	0.243	0.0719	0.2257	0.2656	0.0872	0.1827	0.4828	0.169	0.2199	0.0005	0.2804	0.3497	0.1739	0.0811	0.2064	0.1464	0.4171	0.5528
eIF2Balpha	0.0275	0.0405	0.4632	0.387	0.2915	0.057	0.2865	0.3476	0.0771	0.0254	0.2989	0.118	0.0629	0.1956	0.0277	0.1501	0.3012	0.0723	0.4653	0.1623	0.0018	0.0141	0.118	0.4614	0.0446	0.3058	0.0381	0.3775	0.0705	0.1849	0.1971	0.3886	0.1575	0.4862	0.4678	0.0455	0.2982	0.2077	0.0148	0.0771	0.0451	0.4905	0.4841	0.0518	0.0052	0.0491	0.374	0.2063	0.2427
UQCR-C1	0.2283	0.0977	0.0864	0.1638	0.2449	0.0263	0.3932	0.3343	0.3991	0.0457	0.2331	0.3376	0.3028	0.3989	0.014	0.4855	0.1238	0.2456	0.5025	0.2838	0.218	0.4094	0.1043	0.2055	0.3531	0.2954	0.1058	0.4603	0.3959	0.4802	0.1677	0.1133	0.073	0.2413	0.4153	0.3154	0.1784	0.0452	0.1152	0.005	0.1441	0.3982	0.2005	0.0234	0.147	0.3444	0.1224	0.0151	0.2796
Cp7Fa	0.2198	0.4629	0.0605	0.0918	0.2693	0.3359	0.162	0.0081	0.3312	0.4488	0.3702	0.1263	0.3567	0.0775	0.4395	0.0059	0.4041	0.3797	0.2761	0.1409	0.1465	0.3696	0.4668	0.0933	0.3758	0.2863	0.3404	0.0987	0.3716	0.2298	0.1113	0.1232	0.126	0.3859	0.4891	0.0985	0.0701	0.1794	0.1101	0.3941	0.4825	0.1514	0.2365	0.2897	0.1271	0.003	0.1167	0.3713	0.4255
Send1	0.3429	0.3695	0.4044	0.3361	0.1033	0.2574	0.4286	0.0073	0.4777	0.3974	0.176	0.269	0.2055	0.3917	0.4332	0.0541	0.2727	0.3169	0.2542	0.1012	0.4532	0.2525	0.1955	0.2368	0.2265	0.0299	0.2898	0.0982	0.4553	0.3074	0.0481	0.2161	0.3256	0.0825	0.1937	0.4644	0.3573	0.0378	0.5719	0.4465	0.3482	0.0842	0.0172	0.3611	0.3206	0.2855	0.2568	0.4534	0.5759
	0.3553	0.2505	0.2808	0.5034	0.102	0.4462	0.5237	0.0155	0.0834	0.2226	0.2366	0.4127	0.018	0.3383	0.3052	0.1391	0.2421	0.3645	0.2984	0.0109	0.2851	0.1931	0.4523	0.1031	0.1144	0.0104	0.4674	0.0948	0.0933	0.0809	0.1998	0.3894	0.3477	0.093	0.3563	0.4355	0.3123	0.0837	0.2766	0.255	0.3578	0.0665	0.0408	0.3983	0.1151	0.3731	0.2634	0.3377	0.1994
l(1)G0193	0.4254	0.2582	0.2126	0.316	0.3144	0.0538	0.1767	0.2703	0.5409	0.0929	0.5497	0.5248	0.2468	0.4577	0.0285	0.4578	0.2994	0.4821	0.5053	0.2425	0.4064	0.5074	0.1651	0.2132	0.4771	0.2406	0.2227	0.3045	0.5762	0.3782	0.1394	0.1619	0.0759	0.2902	0.4761	0.4526	0.1464	0.0293	0.1792	0.0011	0.2766	0.5532	0.1835	0.0746	0.243	0.4196	0.2753	0.022	0.4965
ND-19	0.1103	0.1094	0.5019	0.4656	0.3984	0.4193	0.1737	0.2256	0.0395	0.1436	0.4954	0.1797	0.0539	0.2616	0.2544	0.4364	0.1876	0.1278	0.3107	0.059	0.0538	0.0212	0.3229	0.1758	0.0649	0.0333	0.2501	0.4351	0.04	0.0814	0.4615	0.495	0.0641	0.253	0.4858	0.109	0.3435	0.0382	0.1769	0.4185	0.1681	0.2688	0.1036	0.2754	0.0664	0.2166	0.4976	0.4084	0.1586
Nox	0.5007	0.1504	0.0449	0.0017	0.4674	0.3791	0.4681	0.0325	0.1043	0.2379	0.3936	0.5391	0.1065	0.2176	0.4345	0.0728	0.331	0.0988	0.2235	0.0533	0.4365	0.2378	0.1221	0.0195	0.3771	0.4013	0.318	0.3642	0.0952	0.102	0.4687	0.0126	0.2538	0.2324	0.1043	0.3515	0.039	0.2005	0.191	0.3862	0.3052	0.4372	0.5106	0.4346	0.2799	0.0514	0.4239	0.1321	0.0276
CG32681	0.0483	0.0164	0.0355	0.2673	0.3637	0.0617	0.4298	0.1961	0.1444	0.0062	0.1403	0.344	0.1225	0.3172	0.0048	0.4839	0.3449	0.1164	0.4592	0.1401	0.043	0.1485	0.1362	0.5163	0.2171	0.0865	0.0527	0.2014	0.146	0.159	0.4899	0.1995	0.3963	0.4665	0.3391	0.1648	0.1702	0.4818	0.0492	0.0144	0.0166	0.0452	0.3776	0.0298	0.0356	0.2745	0.0196	0.1322	0.1906
HERC2	0.0806	0.033	0.1783	0.4315	0.4085	0.1841	0.4944	0.1331	0.0275	0.019	0.4045	0.3632	0.0149	0.3062	0.0271	0.4122	0.307	0.1801	0.4397	0.0233	0.0539	0.0679	0.1765	0.3145	0.0449	0.0421	0.1023	0.1368	0.0311	0.057	0.4475	0.292	0.3806	0.1979	0.4457	0.2082	0.1631	0.2612	0.0503	0.0346	0.0456	0.1082	0.1413	0.0764	0.0218	0.2682	0.1345	0.1706	0.2333
CG10340	0.1006	0.0091	0.057	0.0671	0.3107	0.0535	0.4343	0.0614	0.0952	0.0029	0.2863	0.4983	0.0771	0.4786	0.0097	0.3034	0.3847	0.0624	0.157	0.0108	0.0749	0.0404	0.0717	0.3957	0.3443	0.3578	0.0653	0.3058	0.1027	0.2183	0.3297	0.0411	0.3931	0.3807	0.4052	0.1424	0.0169	0.2375	0.0922	0.0167	0.0458	0.197	0.5022	0.026	0.0679	0.4654	0.0774	0.0091	0.053
SC35	0.1471	0.014	0.1101	0.0397	0.1631	0.2618	0.2637	0.2052	0.0076	0.1058	0.4086	0.1912	0.0518	0.3089	0.1771	0.2822	0.4692	0.0065	0.5171	0.0568	0.1452	0.1314	0.0015	0.1194	0.2346	0.2359	0.0265	0.1745	0.0031	0.048	0.0607	0.0123	0.3558	0.0827	0.0127	0.2284	0.0523	0.2249	0.2879	0.2477	0.1203	0.2361	0.1803	0.0852	0.3165	0.2935	0.305	0.0713	0.0423
Pdhb	0.4148	0.2472	0.13	0.1513	0.3431	0.1462	0.3158	0.3384	0.4886	0.1388	0.4159	0.3662	0.2971	0.4129	0.0699	0.4307	0.1333	0.3327	0.4195	0.2951	0.4343	0.4204	0.1303	0.3044	0.2994	0.211	0.2285	0.3627	0.5468	0.3601	0.1286	0.1331	0.0215	0.2269	0.3885	0.463	0.1607	0.0182	0.1956	0.0106	0.3105	0.4979	0.1612	0.0653	0.2896	0.4311	0.3184	0.0153	0.2738
tud	0.1154	0.0975	0.2284	0.4266	0.1997	0.2526	0.3435	0.165	0.0075	0.1885	0.1633	0.3375	0.1661	0.2593	0.2666	0.2796	0.1329	0.2585	0.3691	0.165	0.1991	0.261	0.1655	0.247	0.0283	0.5269	0.0823	0.3231	0.0177	0.0036	0.4693	0.2094	0.2899	0.3916	0.3092	0.4305	0.167	0.4491	0.4932	0.3601	0.0216	0.3883	0.461	0.4059	0.3796	0.466	0.2049	0.3245	0.4642
frc	0.3012	0.0386	0.2596	0.2001	0.1822	0.0171	0.2454	0.1853	0.0698	0.0029	0.4702	0.0858	0.0279	0.3688	0.0049	0.3801	0.3184	0.1237	0.2289	0.0363	0.1634	0.0681	0.0138	0.4113	0.1258	0.3308	0.0348	0.49	0.0611	0.2382	0.0304	0.0237	0.4002	0.2879	0.3041	0.2571	0.0032	0.0849	0.1316	0.0014	0.0999	0.2735	0.2787	0.021	0.1007	0.3176	0.4234	0.0032	0.2538
Sec61gamma	0.0966	0.0028	0.0295	0.0337	0.2697	0.0495	0.4583	0.0565	0.0349	0.0006	0.2722	0.4271	0.0403	0.4454	0.0075	0.3383	0.4788	0.0238	0.2053	0.0092	0.0758	0.0303	0.0304	0.2694	0.2348	0.4055	0.0341	0.3647	0.0369	0.0967	0.3008	0.0169	0.385	0.3118	0.4258	0.1707	0.0093	0.2199	0.1354	0.0166	0.0298	0.2507	0.5432	0.0265	0.0957	0.4841	0.098	0.0093	0.0255
Tim17b	0.1259	0.0239	0.0285	0.2338	0.3962	0.2435	0.4631	0.0764	0.0563	0.0203	0.3104	0.366	0.0335	0.4044	0.0381	0.2421	0.4324	0.1657	0.4746	0.0283	0.1105	0.1451	0.182	0.198	0.1182	0.0562	0.1177	0.066	0.058	0.0508	0.3901	0.1663	0.4077	0.2407	0.4559	0.3255	0.1129	0.4187	0.1268	0.0392	0.0382	0.0327	0.1128	0.0948	0.0768	0.5055	0.0434	0.1556	0.1553
CG9650	0.2071	0.4992	0.4962	0.417	0.377	0.3898	0.0736	0.4812	0.3291	0.3371	0.1134	0.1003	0.0735	0.4632	0.2541	0.4742	0.2268	0.5343	0.2524	0.3351	0.281	0.4471	0.1512	0.4745	0.103	0.4283	0.3041	0.3561	0.2252	0.3728	0.0464	0.2643	0.1857	0.3507	0.0585	0.174	0.2216	0.1559	0.5124	0.1069	0.3849	0.1411	0.4337	0.2857	0.5145	0.444	0.1528	0.1793	0.5003
mRpS31	0.1316	0.0825	0.0872	0.293	0.162	0.018	0.2028	0.414	0.3396	0.036	0.0822	0.3078	0.3553	0.3205	0.0142	0.433	0.319	0.396	0.4867	0.3657	0.1763	0.3727	0.1271	0.1747	0.3794	0.5015	0.0583	0.4241	0.3716	0.3782	0.3432	0.1273	0.2187	0.3374	0.25	0.3535	0.1489	0.0857	0.1195	0.0086	0.0232	0.3838	0.3084	0.0568	0.1443	0.4014	0.0104	0.1566	0.4627
CG32834	0.3149	0.2761	0.3779	0.1563	0.0678	0.1572	0.4533	0.2411	0.3059	0.4327	0.2098	0.1945	0.3944	0.353	0.4272	0.0947	0.4137	0.1062	0.3193	0.3942	0.3921	0.5698	0.0118	0.4868	0.3996	0.0453	0.1401	0.1189	0.2837	0.5955	0.0124	0.1241	0.3063	0.0348	0.0821	0.4345	0.1896	0.0041	0.5625	0.4192	0.29	0.0647	0.0311	0.2303	0.3776	0.3203	0.2573	0.2337	0.3628
Letm1	0.0524	0.0197	0.0245	0.1318	0.2071	0.0261	0.4257	0.2746	0.2161	0.0132	0.0647	0.1992	0.2671	0.4026	0.0087	0.4617	0.1528	0.1305	0.4919	0.213	0.0621	0.2415	0.1119	0.3213	0.4901	0.4511	0.0449	0.4095	0.2387	0.259	0.4304	0.1254	0.2385	0.2834	0.2931	0.1513	0.172	0.2084	0.0701	0.0151	0.0165	0.1329	0.3237	0.0221	0.0788	0.3131	0.0078	0.0917	0.2142
loj	0.176	0.0139	0.2395	0.1475	0.3291	0.0573	0.4668	0.0805	0.036	0.0024	0.4318	0.1166	0.0086	0.4318	0.0101	0.4798	0.3854	0.0466	0.1349	0.0016	0.0673	0.0103	0.038	0.4047	0.1562	0.4077	0.0563	0.4042	0.0286	0.2082	0.0962	0.0522	0.4442	0.4339	0.3907	0.1197	0.0077	0.3067	0.0672	0.0163	0.099	0.4554	0.5076	0.0195	0.032	0.2941	0.4106	0.0011	0.0524
aralar1	0.5108	0.4545	0.1502	0.3844	0.0888	0.1597	0.4843	0.0214	0.2901	0.4567	0.5249	0.0956	0.3547	0.408	0.3306	0.0287	0.3765	0.3769	0.4494	0.1921	0.39	0.4721	0.1913	0.0567	0.4271	0.0203	0.2532	0.0405	0.3501	0.1146	0.0029	0.3834	0.4535	0.1034	0.2784	0.2846	0.4837	0.134	0.2794	0.3795	0.4281	0.0106	0.017	0.2326	0.3994	0.097	0.0695	0.2463	0.4118
Sxl	0.1765	0.0149	0.0458	0.1272	0.1737	0.0835	0.1878	0.12	0.0103	0.0138	0.3072	0.2554	0.0264	0.3387	0.0213	0.3884	0.2716	0.0871	0.3856	0.0644	0.2043	0.1943	0.0008	0.2545	0.0401	0.2691	0.0042	0.4093	0.01	0.0254	0.1176	0.0088	0.2545	0.217	0.1005	0.485	0.0156	0.0945	0.2606	0.014	0.0266	0.2991	0.2268	0.06	0.2545	0.4402	0.2516	0.0834	0.2434
Cp7Fb	0.1143	0.3526	0.2859	0.2368	0.3414	0.4044	0.0745	0.0081	0.3993	0.4961	0.2573	0.3319	0.4111	0.0068	0.3723	0.017	0.1552	0.2	0.1399	0.2081	0.0911	0.4318	0.333	0.1581	0.4886	0.4308	0.2306	0.1331	0.4428	0.339	0.122	0.1959	0.3571	0.4128	0.3358	0.0845	0.0839	0.2182	0.0385	0.4812	0.3768	0.3599	0.2718	0.1412	0.0935	0.0006	0.1981	0.4764	0.337
CG43090	0.5101	0.1661	0.3562	0.1541	0.427	0.4005	0.3959	0.0103	0.0709	0.0966	0.1248	0.1489	0.0237	0.1707	0.2587	0.0954	0.0621	0.2185	0.0146	0.0047	0.3843	0.0151	0.2199	0.0691	0.1128	0.3337	0.3689	0.239	0.0671	0.1127	0.4736	0.0983	0.2592	0.4496	0.3666	0.4715	0.0254	0.4982	0.4196	0.2623	0.3379	0.4694	0.2146	0.4001	0.362	0.1703	0.4647	0.0909	0.1134
Arp10	0.0853	0.0272	0.1809	0.0799	0.0355	0.0636	0.2448	0.3901	0.2596	0.0489	0.1831	0.2662	0.2549	0.1944	0.0407	0.0779	0.134	0.0091	0.4771	0.3177	0.0645	0.1796	0.0022	0.2986	0.4789	0.0511	0.0081	0.0706	0.2085	0.4434	0.0038	0.0305	0.2433	0.0105	0.1225	0.0855	0.1588	0.059	0.0496	0.0748	0.0953	0.1724	0.0062	0.003	0.1208	0.0694	0.4221	0.0142	0.0619
CG13630	0.0082	0.0001	0.0255	0.0409	0.0901	0.059	0.16	0.3249	0.097	0.0138	0.0584	0.5028	0.1632	0.1705	0.0166	0.185	0.1545	0.0002	0.396	0.1691	0.0129	0.115	0.0028	0.4597	0.3922	0.3364	0.0018	0.229	0.0856	0.1533	0.1181	0.0466	0.3127	0.1188	0.2209	0.0441	0.147	0.2335	0.0367	0.0671	0.0068	0.4492	0.174	0.0017	0.0608	0.11	0.2041	0.0527	0.0163
CG7737	0.4342	0.282	0.39	0.2165	0.3143	0.4036	0.2945	0.4958	0.4694	0.2704	0.1689	0.2249	0.0959	0.0825	0.2748	0.5586	0.2831	0.123	0.403	0.181	0.3831	0.2337	0.1441	0.407	0.4496	0.5109	0.3619	0.3631	0.3272	0.3333	0.0444	0.2475	0.2088	0.468	0.0804	0.3162	0.2791	0.3342	0.1664	0.2091	0.3196	0.5104	0.3931	0.0915	0.2608	0.2556	0.1044	0.0228	0.1116
FoxK	0.188	0.2172	0.2866	0.2794	0.4612	0.3696	0.3347	0.2169	0.0726	0.2243	0.4617	0.0714	0.1072	0.4949	0.3394	0.2936	0.0555	0.2821	0.2825	0.149	0.1093	0.0296	0.3843	0.2581	0.0188	0.1816	0.2802	0.3863	0.0769	0.1156	0.4956	0.4416	0.016	0.2884	0.4727	0.1747	0.3183	0.0451	0.2882	0.4807	0.2107	0.4262	0.1667	0.4389	0.1332	0.2505	0.4049	0.4182	0.4025
Nle	0.141	0.061	0.0625	0.2642	0.3049	0.2571	0.4663	0.0888	0.164	0.0517	0.3451	0.2286	0.094	0.3824	0.061	0.1605	0.4141	0.2881	0.3667	0.0649	0.1494	0.2241	0.3275	0.3568	0.3037	0.0816	0.2353	0.0657	0.1799	0.1817	0.3013	0.2857	0.3461	0.1847	0.2553	0.3367	0.1713	0.4213	0.1128	0.0438	0.0857	0.0194	0.1324	0.12	0.0812	0.4443	0.0243	0.1568	0.2172
CG7888	0.0086	0.0101	0.1401	0.1339	0.0462	0.0075	0.1356	0.3417	0.2207	0.0177	0.0387	0.4101	0.3308	0.1329	0.0086	0.0656	0.0715	0.0014	0.4288	0.3195	0.0074	0.117	0.0119	0.1821	0.4731	0.1798	0.003	0.1463	0.2306	0.3732	0.0511	0.1287	0.4119	0.0816	0.3986	0.0074	0.2481	0.2167	0.0105	0.0651	0.0224	0.3799	0.0984	0.001	0.0302	0.0309	0.2487	0.0497	0.0485
CG5174	0.0903	0.0579	0.0489	0.3502	0.4712	0.2373	0.4355	0.1523	0.1028	0.0673	0.1494	0.2388	0.1474	0.4437	0.0908	0.2896	0.4227	0.3516	0.501	0.131	0.1222	0.2465	0.3249	0.327	0.1689	0.0457	0.1609	0.1033	0.1283	0.0767	0.1877	0.2852	0.4874	0.2676	0.2496	0.3422	0.2024	0.3508	0.1842	0.0993	0.0283	0.0239	0.1238	0.2072	0.1196	0.4463	0.0058	0.4068	0.4483
Mondo	0.2533	0.117	0.3198	0.426	0.2934	0.4096	0.3876	0.0315	0.0282	0.077	0.2898	0.2005	0.0112	0.3273	0.198	0.2026	0.0494	0.2998	0.1854	0.0082	0.2242	0.0277	0.3052	0.0907	0.0168	0.0176	0.2977	0.0891	0.0302	0.0434	0.3675	0.2526	0.1897	0.1198	0.5055	0.4262	0.1078	0.2011	0.3602	0.2021	0.182	0.191	0.0285	0.3583	0.1911	0.3615	0.3088	0.2886	0.2807
sim	0.0378	0.0889	0.3658	0.2794	0.1844	0.0329	0.2121	0.1601	0.2775	0.0829	0.2199	0.1135	0.2425	0.0775	0.0446	0.0209	0.3868	0.0941	0.3573	0.3894	0.0072	0.0977	0.1103	0.1297	0.145	0.3246	0.0412	0.2176	0.2645	0.3814	0.0436	0.4838	0.2146	0.3213	0.4748	0.0202	0.5116	0.3337	0.0051	0.1192	0.0859	0.2881	0.2771	0.0226	0.0113	0.002	0.4129	0.2341	0.3403
CG1983	0.5713	0.4572	0.118	0.3425	0.2656	0.3564	0.2562	0.2083	0.2024	0.4178	0.1002	0.0784	0.1615	0.4732	0.3951	0.433	0.0583	0.3973	0.0612	0.1469	0.2929	0.0262	0.388	0.1805	0.1272	0.0617	0.3551	0.5058	0.2018	0.2621	0.4224	0.3677	0.0123	0.1917	0.4394	0.2498	0.3308	0.0319	0.5377	0.279	0.401	0.451	0.0218	0.3408	0.2747	0.4365	0.1474	0.4928	0.3086
Clic	0.2134	0.254	0.3427	0.2515	0.0785	0.2423	0.0596	0.1583	0.439	0.3498	0.3553	0.1092	0.4964	0.1791	0.3763	0.0351	0.2562	0.0338	0.386	0.4699	0.1363	0.1474	0.1008	0.3555	0.3788	0.1033	0.1702	0.0127	0.3808	0.3347	0.0216	0.2725	0.3196	0.0454	0.1516	0.0453	0.4736	0.3728	0.2018	0.4261	0.4305	0.0701	0.0579	0.157	0.2781	0.061	0.0603	0.161	0.0706
Egm	0.4105	0.3342	0.353	0.4197	0.1307	0.0498	0.0249	0.392	0.4203	0.1366	0.4137	0.346	0.3926	0.0475	0.0874	0.4761	0.2836	0.3612	0.3551	0.4175	0.4151	0.4742	0.1738	0.2088	0.2981	0.1237	0.1631	0.4791	0.432	0.4656	0.2105	0.0963	0.2873	0.255	0.4164	0.3121	0.057	0.0163	0.4691	0.0534	0.221	0.1634	0.1563	0.2828	0.4818	0.3147	0.2009	0.2062	0.2118
Cyp6a22	0.3464	0.3726	0.2243	0.2529	0.2284	0.4179	0.0156	0.2317	0.4177	0.4701	0.4466	0.14	0.4276	0.1597	0.4489	0.1563	0.2504	0.0642	0.2097	0.5083	0.1984	0.1255	0.2776	0.4524	0.2513	0.2563	0.4087	0.0345	0.4661	0.244	0.1139	0.4303	0.2039	0.1106	0.2865	0.0473	0.4115	0.3996	0.292	0.2416	0.3479	0.1786	0.1683	0.2938	0.325	0.1218	0.0421	0.1929	0.0497
CG13114	0.2101	0.4981	0.2732	0.1612	0.35	0.355	0.0676	0.0342	0.349	0.3601	0.3983	0.4703	0.4319	0.0014	0.4648	0.1057	0.1786	0.3387	0.1333	0.2257	0.1629	0.4925	0.3994	0.2812	0.4914	0.3191	0.4673	0.3939	0.3884	0.3377	0.3345	0.0723	0.3412	0.3094	0.4418	0.1541	0.0249	0.0669	0.0674	0.3749	0.4616	0.3802	0.4534	0.2765	0.1081	0.0186	0.2243	0.3556	0.3721
slmo	0.0178	0.0688	0.4291	0.3495	0.0379	0.1511	0.2234	0.471	0.0166	0.1526	0.0652	0.1984	0.3759	0.3439	0.2607	0.1141	0.2878	0.1358	0.2936	0.2619	0.0354	0.0665	0.1633	0.4466	0.1868	0.3672	0.0835	0.0245	0.0496	0.0597	0.4054	0.26	0.0549	0.1097	0.4789	0.0792	0.2827	0.3448	0.3514	0.4756	0.0202	0.2618	0.3378	0.3094	0.2414	0.2644	0.3347	0.4583	0.2846
Idh3b	0.4461	0.3111	0.2367	0.1378	0.3325	0.2035	0.4021	0.3381	0.2873	0.2398	0.5042	0.4321	0.4009	0.4486	0.155	0.4231	0.1123	0.4262	0.4396	0.3357	0.4636	0.4092	0.2613	0.3066	0.1611	0.1548	0.3664	0.4157	0.3584	0.1425	0.1569	0.172	0.0349	0.1576	0.4355	0.4631	0.1629	0.0166	0.2428	0.051	0.5611	0.5432	0.1334	0.1206	0.3359	0.5571	0.4113	0.014	0.2499
Rab14	0.1013	0.0484	0.008	0.0797	0.4018	0.2018	0.3845	0.2787	0.2977	0.076	0.1063	0.0626	0.3108	0.2653	0.0584	0.3541	0.0624	0.1548	0.3777	0.2505	0.1522	0.4399	0.1659	0.4775	0.3377	0.3063	0.1229	0.2354	0.3095	0.3013	0.49	0.1472	0.0756	0.3638	0.4253	0.2971	0.2196	0.1996	0.1121	0.0508	0.0719	0.0478	0.4245	0.0475	0.1621	0.4223	0.0208	0.105	0.1441
ATPsyndelta	0.0654	0.0722	0.4273	0.264	0.4661	0.3387	0.0813	0.1863	0.0243	0.106	0.4457	0.1961	0.0787	0.3072	0.2416	0.4781	0.3091	0.0412	0.147	0.0211	0.0379	0.0011	0.2469	0.1394	0.1684	0.1959	0.2173	0.4999	0.0371	0.1173	0.4972	0.342	0.0668	0.4622	0.494	0.0453	0.2745	0.0926	0.1983	0.4534	0.1603	0.3116	0.2824	0.2482	0.0885	0.27	0.4927	0.2521	0.0265
CG31683	0.1122	0.0044	0.1454	0.0212	0.1764	0.182	0.0783	0.2873	0.1203	0.0626	0.4482	0.3456	0.1116	0.1918	0.1073	0.4701	0.2221	0.0062	0.2278	0.0196	0.0842	0.1022	0.0149	0.388	0.3822	0.4374	0.0567	0.3085	0.0801	0.36	0.0672	0.0013	0.3136	0.0343	0.1379	0.0878	0.0193	0.2248	0.0706	0.1779	0.2021	0.5571	0.1416	0.0074	0.1256	0.2557	0.3644	0.0016	0.0061
unc-13	0.2376	0.3148	0.086	0.4859	0.2821	0.2658	0.1854	0.2927	0.4684	0.3641	0.0359	0.0852	0.3214	0.4828	0.2187	0.3215	0.2037	0.397	0.036	0.245	0.4395	0.1068	0.3166	0.196	0.4835	0.3498	0.1762	0.4604	0.44	0.3685	0.4511	0.3932	0.0815	0.3751	0.4704	0.3182	0.4473	0.149	0.341	0.1674	0.0914	0.3752	0.2523	0.2809	0.4815	0.418	0.0248	0.3373	0.1764
CG6126	0.1325	0.0331	0.0425	0.0154	0.2546	0.3911	0.4419	0.1108	0.0092	0.059	0.4031	0.2859	0.0689	0.236	0.2336	0.3097	0.2045	0.0236	0.3028	0.0523	0.2306	0.0717	0.0207	0.0507	0.1183	0.5309	0.1253	0.4821	0.0115	0.0224	0.5079	0.0233	0.5189	0.219	0.1864	0.5236	0.0657	0.3215	0.5107	0.3162	0.1438	0.5132	0.4824	0.2832	0.3737	0.2329	0.3097	0.1787	0.0512
CG8993	0.34	0.0677	0.2228	0.0571	0.1419	0.0276	0.3928	0.1842	0.1993	0.0169	0.4875	0.1957	0.1218	0.2984	0.0279	0.4632	0.4887	0.0881	0.086	0.0752	0.2537	0.062	0.0282	0.4906	0.4206	0.2586	0.0832	0.3993	0.1875	0.3711	0.0619	0.0101	0.3466	0.1518	0.3632	0.2358	0.0085	0.036	0.2443	0.031	0.1895	0.2895	0.1849	0.049	0.218	0.4997	0.4269	0	0.0995
wake	0.2215	0.1052	0.1607	0.1773	0.3759	0.1765	0.2596	0.0308	0.0711	0.0258	0.5318	0.2784	0.0681	0.1049	0.1195	0.1352	0.0841	0.2934	0.0682	0.0249	0.2568	0.0331	0.2121	0.1427	0.0796	0.1803	0.2363	0.1377	0.0782	0.0932	0.3682	0.0829	0.3022	0.4621	0.4685	0.4976	0.0456	0.422	0.5617	0.1499	0.1323	0.3038	0.1377	0.3375	0.2858	0.1598	0.1411	0.1931	0.3185
Ag5r	0.1077	0.202	0.2261	0.2349	0.0076	0.1228	0.2458	0.1519	0.5227	0.3554	0.0026	0.2815	0.1104	0.4803	0.317	0.0694	0.1046	0.2022	0.3083	0.1901	0.1739	0.4326	0.1869	0.1572	0.224	0.0734	0.0974	0.0369	0.4762	0.5304	0.3311	0.2369	0.4067	0.0104	0.5029	0.1739	0.5256	0.1474	0.301	0.5127	0.0929	0.2262	0.0243	0.2343	0.451	0.2093	0.1875	0.4388	0.5109
Nf1	0.1999	0.2297	0.5002	0.1353	0.2444	0.3684	0.3759	0.3138	0.1038	0.1771	0.4437	0.3082	0.0676	0.327	0.1767	0.5057	0.1366	0.4953	0.4076	0.1752	0.1533	0.2181	0.4892	0.4054	0.0144	0.0239	0.3098	0.1547	0.1127	0.1009	0.3651	0.2819	0.1908	0.0381	0.331	0.3764	0.4742	0.0638	0.1377	0.1843	0.1642	0.177	0.0542	0.3186	0.0536	0.2586	0.2488	0.4235	0.4241
CG32276	0.2085	0.0543	0.197	0.3144	0.4129	0.1289	0.4246	0.1412	0.1251	0.0149	0.4456	0.36	0.0227	0.319	0.0158	0.3408	0.4656	0.2044	0.2863	0.0209	0.1069	0.0848	0.139	0.4758	0.158	0.1088	0.1223	0.1219	0.1178	0.2842	0.2706	0.1984	0.4418	0.3323	0.4146	0.2228	0.0893	0.4534	0.0395	0.0081	0.1187	0.1658	0.3267	0.04	0.0207	0.3219	0.1996	0.0243	0.1957
Muc68E	0.4684	0.2888	0.0909	0.158	0.1175	0.1541	0.1318	0.2688	0.4607	0.2302	0.1047	0.2037	0.3542	0.0402	0.2128	0.3477	0.4177	0.4669	0.3807	0.5001	0.41	0.4092	0.2696	0.3467	0.3842	0.1959	0.2333	0.5676	0.5183	0.3896	0.4062	0.0671	0.1846	0.1188	0.3329	0.3389	0.0719	0.0226	0.3128	0.1906	0.1345	0.5122	0.1931	0.3966	0.3094	0.1583	0.0217	0.3718	0.3421
CG2765	0.4668	0.1934	0.2071	0.1687	0.4498	0.4621	0.1372	0.0379	0.0535	0.0844	0.1858	0.1545	0.006	0.1819	0.2173	0.1065	0.0157	0.2729	0.2372	0.017	0.466	0.1026	0.0941	0.0638	0.0166	0.3653	0.273	0.1642	0.041	0.0858	0.4306	0.0707	0.5015	0.4211	0.195	0.3118	0.0334	0.321	0.4149	0.1762	0.2405	0.5889	0.2399	0.3827	0.3928	0.1239	0.4289	0.1473	0.2344
apolpp	0.268	0.0766	0.0406	0.0563	0.5284	0.4002	0.2107	0.0347	0.0327	0.0121	0.4097	0.2792	0.0015	0.2461	0.1406	0.0686	0.127	0.1466	0.3262	0.0051	0.3184	0.1124	0.029	0.077	0.0425	0.2121	0.1839	0.0848	0.0228	0.0658	0.479	0.0396	0.3705	0.4398	0.2281	0.3645	0.0266	0.3005	0.569	0.0885	0.1792	0.3524	0.2097	0.2303	0.3271	0.145	0.3115	0.1288	0.1125
Mocs1	0.1626	0.1661	0.4953	0.3716	0.0714	0.0047	0.35	0.2143	0.3454	0.0619	0.1847	0.3353	0.4524	0.3331	0.0254	0.1316	0.1241	0.215	0.2726	0.4614	0.0873	0.1895	0.1415	0.0169	0.3024	0.2023	0.1004	0.2254	0.3586	0.1387	0.0522	0.2651	0.469	0.1423	0.2369	0.0504	0.3565	0.1397	0.0277	0.0564	0.182	0.2974	0.0729	0.0178	0.0589	0.0791	0.3467	0.034	0.3262
CrebB	0.0512	0.0091	0.3392	0.2099	0.0157	0.0054	0.5224	0.1832	0.0277	0.0033	0.1717	0.0684	0.1544	0.1931	0.0098	0.2168	0.3282	0.1218	0.1055	0.0554	0.035	0.0156	0.031	0.315	0.1796	0.176	0.0056	0.1188	0.0498	0.1734	0.1474	0.015	0.1927	0.052	0.4076	0.0694	0.0026	0.2081	0.1512	0.078	0.0085	0.1656	0.1302	0.0582	0.0659	0.3229	0.2652	0.0789	0.1893
CG14777	0.0443	0.0349	0.1857	0.3153	0.0599	0.0268	0.4065	0.2588	0.2468	0.047	0.0878	0.3478	0.2831	0.1484	0.0134	0.0333	0.1653	0.0545	0.181	0.4544	0.0428	0.3133	0.009	0.1439	0.3113	0.1623	0.0019	0.1546	0.2266	0.3484	0.0133	0.1521	0.2497	0.1194	0.2255	0.1167	0.3073	0.1324	0.0163	0.0249	0.0312	0.2472	0.0575	0.0027	0.0571	0.0237	0.3479	0.1013	0.2442
Cpr	0.3845	0.4448	0.389	0.4173	0.2358	0.1445	0.4445	0.0651	0.0548	0.4005	0.2747	0.3776	0.1364	0.2974	0.2233	0.2324	0.0453	0.418	0.4757	0.101	0.3691	0.3613	0.4823	0.0016	0.0848	0.1576	0.4086	0.2763	0.0542	0.0165	0.1794	0.4275	0.2562	0.2265	0.1935	0.2742	0.2683	0.1557	0.1323	0.2029	0.4742	0.3467	0.116	0.1527	0.245	0.1745	0.4263	0.2004	0.3809
CG2767	0.0414	0.0417	0.4081	0.4185	0.2415	0.0094	0.4915	0.4708	0.179	0.0059	0.2993	0.1534	0.0904	0.2756	0.001	0.1618	0.4723	0.1712	0.3902	0.1907	0.0121	0.0565	0.0855	0.1713	0.1053	0.412	0.0337	0.5037	0.1705	0.3564	0.0957	0.2934	0.3368	0.4971	0.3534	0.0679	0.2322	0.4706	0.0023	0.0078	0.0367	0.4933	0.4439	0.0095	0.0002	0.0573	0.2562	0.0702	0.3542
ND-ACP	0.0849	0.0066	0.0462	0.1914	0.143	0.0106	0.245	0.1414	0.0195	0.0014	0.1606	0.3759	0.0635	0.2939	0.0029	0.4144	0.3495	0.1231	0.4442	0.0676	0.0871	0.1164	0.0178	0.4613	0.0762	0.5578	0.0056	0.492	0.0318	0.045	0.252	0.0316	0.3991	0.2909	0.4446	0.2879	0.0202	0.1604	0.1418	0.005	0.003	0.4823	0.3516	0.0345	0.1015	0.4106	0.0502	0.094	0.3474
Vm26Aa	0.0273	0.14	0.397	0.2846	0.1509	0.0916	0.1122	0.0073	0.3691	0.1978	0.0928	0.2955	0.503	0.0488	0.1303	0.011	0.2148	0.1308	0.2442	0.3338	0.0138	0.2368	0.2303	0.0723	0.3621	0.3405	0.0769	0.168	0.3742	0.5221	0.1573	0.3327	0.234	0.2666	0.398	0.0111	0.2262	0.2662	0.0097	0.2839	0.0963	0.3469	0.2196	0.054	0.0252	0.0008	0.4418	0.4626	0.4135
CG3566	0.017	0.0304	0.4542	0.444	0.2159	0.0112	0.3212	0.4265	0.1766	0.0061	0.2237	0.1658	0.1238	0.2734	0.0034	0.1571	0.4919	0.1277	0.2749	0.1794	0.0025	0.0176	0.132	0.2025	0.1414	0.3319	0.043	0.4356	0.1822	0.3394	0.1769	0.3539	0.1836	0.5129	0.2415	0.0209	0.2627	0.3606	0.002	0.0319	0.0293	0.4308	0.4608	0.016	0.0001	0.0538	0.2331	0.0989	0.2587
Cyp6a17	0.2397	0.0428	0.0632	0.0806	0.4087	0.1076	0.2446	0.0249	0.0697	0.0058	0.5102	0.3372	0.0321	0.2234	0.0274	0.1451	0.2481	0.181	0.1417	0.0116	0.2498	0.0561	0.0828	0.1982	0.1399	0.2401	0.1242	0.1078	0.0712	0.1061	0.4501	0.0326	0.3944	0.5399	0.4618	0.4604	0.0088	0.231	0.2853	0.0184	0.1085	0.25	0.3511	0.139	0.2255	0.2569	0.121	0.0352	0.1552
jagn	0.3084	0.3092	0.143	0.2143	0.0476	0.2855	0.3429	0.0051	0.2057	0.2688	0.1054	0.3677	0.0237	0.3508	0.3257	0.0315	0.3929	0.3504	0.4102	0.0205	0.3662	0.3704	0.3818	0.0503	0.3156	0.0796	0.4407	0.0114	0.1614	0.1964	0.4083	0.2687	0.1697	0.1254	0.2745	0.2655	0.144	0.4791	0.5	0.177	0.4162	0.0709	0.0863	0.3546	0.4188	0.1856	0.4445	0.1193	0.174
UQCR-C2	0.1198	0.0209	0.0394	0.2344	0.4031	0.0805	0.3448	0.2686	0.1039	0.0101	0.2878	0.4925	0.0457	0.2588	0.0027	0.468	0.3627	0.1283	0.3323	0.1135	0.1004	0.2501	0.0392	0.4921	0.145	0.3502	0.0272	0.2626	0.0917	0.1576	0.1732	0.1039	0.158	0.508	0.3365	0.3135	0.1087	0.2079	0.0375	0.002	0.0368	0.2505	0.4434	0.0073	0.0554	0.2404	0.1149	0.0427	0.2199
Chmp1	0.0057	0.0094	0.2857	0.1629	0.0377	0.0361	0.0661	0.3044	0.2149	0.027	0.0862	0.2441	0.2805	0.1082	0.0264	0.0357	0.1392	0.0019	0.4213	0.3033	0.0023	0.0482	0.0179	0.2436	0.4624	0.2158	0.0066	0.0714	0.1993	0.4409	0.0296	0.143	0.4195	0.0577	0.3353	0.0026	0.2945	0.3331	0.004	0.1261	0.0364	0.3294	0.0822	0.0022	0.0135	0.0115	0.4814	0.0444	0.0401
RpI135	0.333	0.4024	0.1395	0.3138	0.3686	0.242	0.3371	0.509	0.2642	0.3367	0.0715	0.0362	0.201	0.2708	0.2733	0.2883	0.1465	0.326	0.4464	0.3275	0.4881	0.2876	0.3977	0.2045	0.1534	0.4261	0.4431	0.2641	0.2181	0.3307	0.1722	0.4067	0.1987	0.4384	0.0751	0.4728	0.4764	0.1932	0.4431	0.2547	0.2241	0.1595	0.4729	0.3969	0.5043	0.2685	0.0031	0.4792	0.3305
Rgk3	0.0293	0.0004	0.1959	0.1133	0.0078	0.0011	0.4665	0.4137	0.0654	0.0017	0.2024	0.1445	0.1034	0.4974	0.0029	0.1604	0.3978	0.0273	0.2352	0.0778	0.0265	0.051	0.0046	0.2909	0.2484	0.1985	0.0045	0.2022	0.0634	0.3027	0.0329	0.0103	0.4642	0.0262	0.354	0.0655	0.0003	0.0894	0.0332	0.0113	0.0125	0.2497	0.0634	0.0049	0.0395	0.1579	0.3067	0.0024	0.144
mRpL18	0.0834	0.0061	0.0784	0.0903	0.2612	0.0625	0.4348	0.0562	0.0281	0.0011	0.2557	0.356	0.0509	0.3413	0.016	0.3596	0.3509	0.0579	0.112	0.0105	0.0567	0.0126	0.0797	0.2408	0.1566	0.2123	0.056	0.3257	0.0373	0.0721	0.4635	0.0497	0.3615	0.363	0.4146	0.1372	0.0243	0.4311	0.1632	0.054	0.02	0.227	0.3655	0.0747	0.0826	0.4895	0.0776	0.0576	0.0931
fmt	0.1483	0.0688	0.0303	0.2125	0.4131	0.4499	0.3492	0.411	0.2025	0.1732	0.2982	0.2735	0.1267	0.0264	0.1294	0.4143	0.1347	0.0806	0.0671	0.2665	0.1794	0.4708	0.0812	0.3342	0.3438	0.3099	0.0954	0.3149	0.1562	0.1934	0.2206	0.2422	0.0545	0.4728	0.0916	0.39	0.366	0.3689	0.0786	0.0846	0.1424	0.1814	0.4596	0.0403	0.1545	0.17	0.329	0.1625	0.0974
lncRNA:CR45184	0.2024	0.1099	0.4176	0.3478	0.0066	0.0073	0.3891	0.4566	0.1602	0.0495	0.2875	0.0211	0.2889	0.1698	0.0584	0.0807	0.2624	0.1758	0.1415	0.2535	0.1201	0.0559	0.0455	0.2126	0.203	0.0471	0.0312	0.0356	0.1691	0.3673	0.0415	0.069	0.1854	0.0348	0.4824	0.1244	0.0631	0.1402	0.2602	0.1553	0.0935	0.0161	0.0461	0.1203	0.1977	0.2396	0.4755	0.1194	0.372
SecS	0.2569	0.1271	0.23	0.4777	0.2873	0.1754	0.0833	0.1154	0.0187	0.0823	0.3882	0.2133	0.0588	0.1146	0.1444	0.511	0.0282	0.4236	0.506	0.0965	0.3049	0.2028	0.1364	0.2196	0.0023	0.4229	0.1025	0.4385	0.0288	0.0141	0.4797	0.1381	0.339	0.4806	0.3472	0.3772	0.0782	0.4072	0.5167	0.1361	0.0698	0.3503	0.3776	0.366	0.3439	0.3827	0.1956	0.4729	0.3086
Drs	0.4298	0.1627	0.0397	0.0007	0.4915	0.3617	0.4772	0.0206	0.1129	0.2607	0.5026	0.3953	0.1426	0.1585	0.4683	0.0241	0.3083	0.1759	0.1845	0.0712	0.4575	0.2498	0.2351	0.0232	0.389	0.4902	0.3907	0.248	0.1126	0.1002	0.2768	0.044	0.3533	0.2729	0.2447	0.3503	0.0613	0.3084	0.1683	0.4538	0.2747	0.2526	0.3574	0.4791	0.2875	0.0155	0.2529	0.242	0.0503
dec-1	0.0299	0.1617	0.3597	0.2762	0.1061	0.0759	0.121	0.0032	0.5373	0.2228	0.082	0.2896	0.4094	0.0621	0.1321	0.0057	0.1726	0.1527	0.2344	0.2416	0.0215	0.2868	0.1979	0.0349	0.433	0.306	0.0611	0.0842	0.5406	0.4144	0.0938	0.3615	0.2713	0.2317	0.4447	0.0178	0.2207	0.3714	0.0102	0.2939	0.117	0.2616	0.1644	0.0559	0.0384	0.0004	0.4905	0.436	0.4579
nrv1	0.4774	0.3552	0.181	0.3656	0.0849	0.4455	0.2375	0.3175	0.3641	0.296	0.333	0.2191	0.1028	0.1829	0.2142	0.1923	0.4816	0.4331	0.1333	0.2902	0.4808	0.3764	0.4938	0.4005	0.2048	0.0852	0.4454	0.0363	0.3317	0.2589	0.3793	0.3697	0.1662	0.0675	0.4774	0.2778	0.5354	0.3508	0.1865	0.0907	0.3628	0.0581	0.1268	0.2555	0.2049	0.491	0.1855	0.3844	0.5376
Uhg4	0.4358	0.0891	0.3983	0.2085	0.1456	0.0603	0.2371	0.2166	0.0497	0.0395	0.3412	0.0149	0.036	0.2824	0.0464	0.3157	0.1799	0.1267	0.2335	0.0442	0.273	0.0781	0.0145	0.4531	0.1014	0.1734	0.0432	0.3232	0.0333	0.2164	0.0152	0.0213	0.4936	0.1819	0.1295	0.3324	0.0018	0.0845	0.3255	0.0522	0.1895	0.0609	0.1714	0.0763	0.2398	0.3701	0.2952	0.0176	0.2766
Act88F	0.5098	0.475	0.3304	0.4171	0.2407	0.1871	0.2867	0.1483	0.1563	0.3831	0.2819	0.3189	0.2687	0.3684	0.1881	0.2777	0.0722	0.444	0.2396	0.1745	0.4726	0.1991	0.2456	0.04	0.1901	0.1294	0.2608	0.3376	0.1823	0.1184	0.1007	0.3077	0.0375	0.1898	0.462	0.4318	0.5023	0.0226	0.2399	0.1009	0.4299	0.2868	0.0695	0.1397	0.4209	0.2782	0.3789	0.1741	0.3896
CG10939	0.4031	0.1196	0.0075	0.0341	0.3521	0.2379	0.28	0.1728	0.3242	0.1651	0.2267	0.1282	0.3532	0.4132	0.1479	0.2433	0.1695	0.2395	0.4129	0.2467	0.5272	0.3973	0.115	0.4381	0.3054	0.3888	0.1604	0.2461	0.3253	0.2958	0.4037	0.0147	0.0152	0.2022	0.3065	0.3709	0.0484	0.0106	0.4583	0.0649	0.1588	0.2386	0.2612	0.1416	0.4264	0.2517	0.0607	0.1028	0.206
hiw	0.4603	0.2623	0.4261	0.2788	0.4812	0.1138	0.0562	0.14	0.126	0.0609	0.224	0.0648	0.0367	0.2036	0.0578	0.4099	0.052	0.4228	0.2549	0.0784	0.375	0.1597	0.2445	0.4243	0.0208	0.3647	0.2234	0.2477	0.1348	0.2475	0.2474	0.3008	0.3423	0.2548	0.3821	0.4478	0.0697	0.3984	0.2964	0.0286	0.2474	0.4272	0.32	0.2344	0.1506	0.5023	0.37	0.1768	0.3536
Muc4B	0.1227	0.4405	0.2322	0.2058	0.4856	0.4185	0.0376	0.0382	0.2079	0.4994	0.3012	0.4525	0.333	0.004	0.3812	0.0611	0.1123	0.2715	0.2626	0.1728	0.0816	0.3895	0.4586	0.1188	0.3611	0.3494	0.3933	0.2748	0.2476	0.1539	0.2399	0.1061	0.3077	0.4344	0.3931	0.0559	0.0611	0.1306	0.0185	0.4668	0.491	0.4199	0.4137	0.1635	0.0496	0.0017	0.2783	0.475	0.2737
CG31793	0.1457	0.0945	0.0768	0.3432	0.2804	0.4745	0.4743	0.0568	0.0346	0.1663	0.3312	0.3204	0.0746	0.4834	0.2656	0.2165	0.2603	0.289	0.4593	0.058	0.1999	0.2365	0.3751	0.0834	0.0993	0.0087	0.2643	0.1139	0.0444	0.0109	0.1382	0.3398	0.4065	0.1584	0.4816	0.4484	0.2031	0.1824	0.3454	0.2835	0.0836	0.0377	0.0474	0.3649	0.2275	0.3723	0.0732	0.4561	0.2981
CG9747	0.1787	0.0839	0.1363	0.034	0.0367	0.0921	0.38	0.53	0.1927	0.1448	0.1774	0.2926	0.3264	0.4568	0.1401	0.1211	0.2503	0.013	0.355	0.3118	0.2213	0.3365	0.0008	0.4905	0.4925	0.0622	0.0151	0.0933	0.1836	0.2581	0.0153	0.015	0.1858	0.011	0.0494	0.2558	0.1473	0.0163	0.2724	0.2014	0.1437	0.095	0.0185	0.0671	0.4026	0.2422	0.4266	0.0726	0.0959
Pabp2	0.2326	0.3432	0.1285	0.4581	0.1578	0.5121	0.5094	0.246	0.5141	0.3209	0.2972	0.0701	0.4439	0.363	0.3124	0.138	0.2905	0.4223	0.4834	0.3604	0.3446	0.4814	0.2895	0.4845	0.44	0.0854	0.4356	0.0719	0.4295	0.3981	0.0589	0.3365	0.3194	0.1343	0.1097	0.4798	0.4041	0.2539	0.254	0.2657	0.2628	0.0037	0.1054	0.3925	0.2369	0.349	0.0085	0.4838	0.4267
CG1637	0.4929	0.2045	0.0801	0.0637	0.3903	0.1705	0.1996	0.1518	0.3032	0.0921	0.5073	0.3622	0.2233	0.2539	0.0885	0.1408	0.3692	0.402	0.2438	0.168	0.4756	0.4117	0.1778	0.4566	0.4032	0.335	0.2709	0.1727	0.3044	0.3667	0.3551	0.0581	0.0737	0.2755	0.4653	0.3881	0.0753	0.0282	0.3792	0.0305	0.2898	0.3546	0.3067	0.1592	0.4045	0.2098	0.1533	0.0207	0.3006
Muc12Ea	0.1486	0.079	0.0941	0.0733	0.2076	0.3297	0.4541	0.1038	0.0386	0.1486	0.2242	0.4154	0.1695	0.1447	0.3364	0.4019	0.2142	0.1304	0.2544	0.094	0.2422	0.116	0.1627	0.093	0.1829	0.4983	0.1603	0.3638	0.0538	0.0316	0.3249	0.0666	0.317	0.219	0.3595	0.3948	0.0875	0.4462	0.3714	0.4429	0.0822	0.4771	0.4595	0.4369	0.5241	0.2413	0.1753	0.4495	0.2232
Gapdh1	0.012	0.0508	0.1881	0.4883	0.1388	0.1364	0.1679	0.2565	0.1413	0.1572	0.0245	0.4503	0.3896	0.12	0.1309	0.0591	0.249	0.0642	0.1737	0.5447	0.0258	0.3256	0.1574	0.3435	0.2871	0.3843	0.0211	0.1378	0.156	0.1422	0.3839	0.406	0.3941	0.2079	0.4556	0.0562	0.4585	0.3677	0.0826	0.2977	0.0164	0.4469	0.2173	0.0727	0.0885	0.0396	0.171	0.4403	0.2885
ndl	0.0398	0.1595	0.4409	0.2489	0.213	0.1778	0.1432	0.0142	0.3456	0.2522	0.1069	0.3412	0.4588	0.0283	0.1603	0.0166	0.2297	0.1615	0.1613	0.333	0.0271	0.3399	0.249	0.1198	0.3043	0.3822	0.0906	0.1861	0.3419	0.4026	0.1831	0.2974	0.2928	0.3367	0.4886	0.0412	0.1754	0.2334	0.0186	0.2955	0.1064	0.4022	0.2633	0.0742	0.0362	0.0016	0.4402	0.4692	0.4479
SLIRP1	0.1537	0.1034	0.0842	0.4714	0.235	0.3039	0.3166	0.1411	0.1294	0.0875	0.3705	0.2592	0.0699	0.3701	0.0771	0.2271	0.4448	0.4054	0.3851	0.1076	0.1923	0.3379	0.3562	0.3744	0.131	0.0731	0.2367	0.0646	0.1341	0.0989	0.2955	0.411	0.3402	0.1185	0.337	0.476	0.2344	0.353	0.1187	0.0394	0.0764	0.0389	0.1126	0.1654	0.087	0.5005	0.0257	0.3199	0.4134
Nop56	0.1252	0.0145	0.1069	0.2582	0.464	0.1481	0.4529	0.0662	0.0191	0.0069	0.4677	0.3312	0.0047	0.3386	0.0141	0.3731	0.3586	0.101	0.3827	0.0061	0.0745	0.0566	0.078	0.2666	0.0677	0.0772	0.0662	0.156	0.0158	0.0584	0.2984	0.1352	0.4732	0.3386	0.4215	0.2289	0.0557	0.4811	0.0636	0.016	0.0523	0.1642	0.2597	0.0365	0.0333	0.326	0.1742	0.0511	0.1192
FASN1	0.1886	0.0379	0.0332	0.0594	0.3905	0.3753	0.3541	0.0221	0.0399	0.0202	0.4687	0.3543	0.0096	0.3033	0.1022	0.0774	0.2292	0.1073	0.277	0.0045	0.236	0.0711	0.0911	0.0656	0.1007	0.0557	0.1874	0.0507	0.0354	0.0595	0.4344	0.0646	0.4113	0.3967	0.3041	0.4504	0.0527	0.3773	0.344	0.0776	0.1524	0.1364	0.1083	0.1936	0.2747	0.2319	0.2181	0.1055	0.0689
CG3168	0.4684	0.1795	0.1047	0.0751	0.2035	0.2637	0.0574	0.0983	0.0958	0.1491	0.522	0.2903	0.1327	0.0316	0.2416	0.2884	0.1286	0.3598	0.349	0.1144	0.395	0.3408	0.0651	0.1555	0.1409	0.1657	0.1657	0.5688	0.0975	0.0911	0.4066	0.0126	0.2969	0.1986	0.179	0.2361	0.0151	0.0635	0.1942	0.188	0.1933	0.2272	0.272	0.4158	0.297	0.0696	0.2893	0.2257	0.5213
CG6607	0.5004	0.1259	0.0033	0.0064	0.4874	0.437	0.4382	0.0599	0.0976	0.2592	0.447	0.2158	0.1566	0.4277	0.3518	0.1426	0.3542	0.1148	0.4232	0.0795	0.4195	0.4933	0.0793	0.0405	0.4785	0.4314	0.2288	0.3047	0.0828	0.0724	0.4405	0.0064	0.0359	0.2204	0.0466	0.2984	0.0462	0.0768	0.3082	0.271	0.2848	0.319	0.3949	0.2954	0.2622	0.137	0.3193	0.1371	0.0973
HUWE1	0.0736	0.1614	0.275	0.3534	0.2121	0.373	0.3833	0.2366	0.1718	0.1702	0.3238	0.3116	0.1431	0.2184	0.1856	0.3561	0.4564	0.3651	0.4498	0.18	0.0808	0.2412	0.4646	0.4261	0.1645	0.0117	0.3424	0.122	0.1957	0.1575	0.2124	0.3159	0.3324	0.0936	0.2061	0.2628	0.4539	0.0708	0.0788	0.2144	0.1098	0.0344	0.0804	0.2468	0.0375	0.3031	0.0769	0.4923	0.3456
Crtc	0.2316	0.1909	0.2612	0.1939	0.3103	0.0764	0.2892	0.2412	0.0748	0.0663	0.4462	0.0206	0.0765	0.282	0.1015	0.2485	0.0297	0.4275	0.2302	0.1376	0.1282	0.0322	0.2478	0.4498	0.0057	0.3758	0.1474	0.424	0.0835	0.1523	0.2804	0.4146	0.0421	0.3649	0.3511	0.2285	0.1886	0.2703	0.2163	0.1542	0.1322	0.2764	0.3742	0.2719	0.0831	0.2424	0.4579	0.3764	0.3574
drd	0.0469	0.0478	0.1702	0.2592	0.0125	0.0013	0.3625	0.19	0.3055	0.0706	0.0306	0.4322	0.5277	0.2703	0.0266	0.0384	0.1148	0.0483	0.2553	0.4759	0.0609	0.3732	0.0178	0.0825	0.5023	0.1272	0.004	0.0976	0.314	0.3774	0.0345	0.1269	0.2756	0.043	0.3454	0.0979	0.3093	0.0733	0.0591	0.0673	0.0385	0.22	0.0173	0.0074	0.101	0.0559	0.2285	0.1533	0.3315
LysP	0.1642	0.4184	0.4283	0.4411	0.0566	0.3533	0.3759	0.1362	0.493	0.3711	0.0196	0.3356	0.1307	0.4592	0.4085	0.0448	0.3399	0.4242	0.1464	0.1296	0.3118	0.2861	0.3894	0.2553	0.4571	0.1125	0.2259	0.0346	0.4627	0.3832	0.4966	0.4662	0.4248	0.1112	0.4415	0.3639	0.253	0.4289	0.4846	0.2522	0.1713	0.1935	0.1133	0.4502	0.3801	0.248	0.3112	0.0984	0.2742
CG11892	0.3366	0.2615	0.1453	0.0716	0.4204	0.4184	0.1137	0.0153	0.1235	0.1989	0.3682	0.3761	0.1427	0.0103	0.3634	0.0286	0.1138	0.5	0.0783	0.088	0.3203	0.2554	0.2901	0.1129	0.2571	0.5003	0.4008	0.2157	0.1263	0.1218	0.3227	0.0403	0.4383	0.3602	0.4234	0.2454	0.0239	0.1934	0.1147	0.2981	0.2819	0.4932	0.3504	0.4171	0.2718	0.0044	0.2304	0.2392	0.4699
Vml	0.0821	0.3132	0.2163	0.0953	0.2892	0.2154	0.1281	0.0195	0.4482	0.3248	0.1744	0.3104	0.4474	0.0421	0.2265	0.042	0.2808	0.3522	0.2961	0.2194	0.0379	0.3112	0.477	0.0515	0.3679	0.5104	0.2196	0.2502	0.4536	0.3413	0.2674	0.1152	0.1385	0.5096	0.2598	0.0346	0.0664	0.1154	0.0252	0.3902	0.2226	0.4344	0.3308	0.1453	0.0289	0.0016	0.4783	0.4255	0.4136
CG14615	0.1818	0.03	0.1476	0.0232	0.1927	0.1113	0.4041	0.0401	0.0712	0.0199	0.368	0.3005	0.106	0.1719	0.0994	0.2804	0.3391	0.0753	0.0215	0.0184	0.1532	0.0141	0.0962	0.1932	0.3531	0.4859	0.1404	0.4892	0.071	0.1246	0.4465	0.0151	0.3383	0.188	0.463	0.166	0.0052	0.2941	0.3813	0.1867	0.105	0.4098	0.4595	0.1789	0.2602	0.2948	0.2121	0.0426	0.0826
Ufl1	0.3461	0.3341	0.4824	0.2327	0.4258	0.4969	0.232	0.1187	0.2177	0.352	0.4577	0.3817	0.3854	0.1335	0.3961	0.2125	0.1982	0.3513	0.0075	0.135	0.338	0.0581	0.3863	0.1456	0.4785	0.306	0.3949	0.5009	0.2613	0.2475	0.1318	0.337	0.0599	0.4311	0.2188	0.2411	0.2219	0.2091	0.2925	0.2297	0.3821	0.3362	0.2272	0.2812	0.4861	0.1831	0.3329	0.4921	0.2671
tun	0.3469	0.2381	0.3561	0.2775	0.1402	0.2865	0.1997	0.3587	0.2487	0.2979	0.3939	0.033	0.2502	0.2659	0.3327	0.0823	0.4987	0.0486	0.3843	0.306	0.228	0.1346	0.054	0.4665	0.3767	0.1161	0.1565	0.0376	0.1951	0.4341	0.0065	0.181	0.3541	0.1031	0.0431	0.1559	0.2808	0.3245	0.2985	0.4704	0.4719	0.0391	0.1143	0.1863	0.3275	0.1127	0.0254	0.1193	0.0948
CG12118	0.3853	0.1777	0.1039	0.1164	0.0642	0.0707	0.1498	0.2411	0.3774	0.1147	0.1097	0.3103	0.4773	0.051	0.1076	0.4198	0.431	0.4031	0.3017	0.3883	0.4548	0.439	0.1511	0.3288	0.4565	0.1281	0.1323	0.5122	0.4235	0.3788	0.4399	0.0273	0.2187	0.061	0.3513	0.4768	0.0142	0.0119	0.4369	0.1082	0.0835	0.4329	0.1257	0.2513	0.4533	0.2279	0.0368	0.2154	0.4997
scyl	0.3843	0.1632	0.0865	0.0462	0.4385	0.3999	0.1701	0.0125	0.1484	0.0746	0.1747	0.301	0.0426	0.1839	0.1486	0.028	0.1872	0.2783	0.1538	0.0187	0.4257	0.1893	0.1179	0.0954	0.2581	0.561	0.2823	0.064	0.1175	0.1618	0.3847	0.0332	0.245	0.5817	0.2046	0.3004	0.0112	0.1255	0.4339	0.0986	0.3317	0.4598	0.4191	0.2722	0.5251	0.0883	0.3882	0.0264	0.1203
Pcmt	0.1443	0.348	0.1086	0.1214	0.1768	0.2497	0.0802	0.0056	0.125	0.3737	0.12	0.5198	0.0816	0.1077	0.5089	0.0024	0.1136	0.424	0.3663	0.0815	0.1474	0.5078	0.355	0.0133	0.1876	0.2721	0.479	0.0139	0.1209	0.1044	0.2949	0.1036	0.2194	0.2813	0.1921	0.0861	0.0777	0.2945	0.0613	0.3316	0.4466	0.2822	0.1284	0.3343	0.1672	0.0016	0.3632	0.3129	0.4164
Sccpdh1	0.373	0.3659	0.2056	0.344	0.0658	0.2257	0.322	0.0028	0.0903	0.3525	0.1918	0.3525	0.0603	0.288	0.504	0.0017	0.1162	0.4414	0.2479	0.0407	0.4043	0.2869	0.3895	0.0109	0.1685	0.0193	0.3466	0.0288	0.0972	0.0671	0.0658	0.3973	0.4513	0.0715	0.4406	0.2606	0.1272	0.2023	0.2757	0.411	0.4434	0.053	0.0017	0.3353	0.4801	0.069	0.2146	0.4806	0.3251
CG43134	0.0609	0.285	0.3789	0.3725	0.4753	0.4191	0.0999	0.5026	0.3	0.3491	0.2197	0.4751	0.502	0.4676	0.5026	0.402	0.3331	0.333	0.2079	0.3851	0.0771	0.1055	0.304	0.4186	0.3368	0.1865	0.4737	0.5387	0.3691	0.3226	0.1391	0.251	0.0119	0.3412	0.118	0.0837	0.3646	0.025	0.3227	0.2513	0.2104	0.2277	0.2069	0.4359	0.1755	0.3328	0.249	0.2432	0.3728
LRP1	0.2644	0.1454	0.0735	0.1956	0.2512	0.5753	0.2698	0.038	0.0337	0.1073	0.4262	0.3601	0.0152	0.2626	0.2509	0.0667	0.0895	0.2735	0.4588	0.0369	0.3319	0.16	0.2183	0.037	0.0221	0.0126	0.2865	0.0456	0.0322	0.014	0.3258	0.1251	0.4796	0.2292	0.2913	0.339	0.1156	0.4805	0.5181	0.2289	0.1864	0.1505	0.0162	0.4026	0.3419	0.158	0.2517	0.2739	0.2367
CG5116	0.0753	0.2016	0.3747	0.2675	0.4489	0.3621	0.1799	0.154	0.2894	0.2971	0.1242	0.3599	0.3994	0.0282	0.2133	0.1666	0.2322	0.3064	0.1656	0.4354	0.0615	0.4472	0.4716	0.2787	0.3083	0.0701	0.2154	0.5855	0.3162	0.2847	0.4433	0.2025	0.333	0.2903	0.3199	0.103	0.1279	0.1074	0.0462	0.323	0.1223	0.1257	0.4036	0.1437	0.0439	0.0339	0.1947	0.3441	0.4991
Elp2	0.1345	0.274	0.4089	0.3518	0.1096	0.0918	0.3527	0.5854	0.2785	0.1271	0.1623	0.5301	0.292	0.2474	0.1712	0.5375	0.3749	0.3348	0.0504	0.4654	0.1203	0.1317	0.5113	0.168	0.2792	0.6019	0.3925	0.4481	0.2491	0.161	0.4539	0.4478	0.1448	0.2387	0.003	0.0792	0.3448	0.4791	0.1904	0.2985	0.1998	0.3265	0.417	0.283	0.11	0.5122	0.1099	0.2	0.3238
CG17292	0.4192	0.2528	0.3304	0.4036	0.0268	0.0091	0.3028	0.4384	0.4065	0.1029	0.4687	0.0429	0.3562	0.2742	0.0743	0.1101	0.4066	0.2739	0.2139	0.3967	0.2826	0.1655	0.0641	0.1166	0.347	0.0113	0.0951	0.0876	0.3903	0.3838	0.0067	0.1112	0.4221	0.0604	0.4044	0.2302	0.151	0.0517	0.2619	0.102	0.2939	0.0105	0.0196	0.1114	0.2557	0.2144	0.2886	0.0504	0.4742
kst	0.1877	0.0202	0.0118	0.0141	0.2572	0.1566	0.2584	0.0696	0.0529	0.0019	0.4065	0.3336	0.0426	0.2089	0.0592	0.1895	0.2765	0.0832	0.2684	0.0279	0.2448	0.0924	0.0079	0.1261	0.1433	0.5038	0.0773	0.2685	0.0505	0.0917	0.4312	0.0045	0.3223	0.2631	0.2789	0.4397	0.0046	0.2181	0.3928	0.0313	0.1217	0.4356	0.5071	0.1532	0.3195	0.1988	0.1909	0.0806	0.099
TRAM	0.089	0.5025	0.2245	0.1263	0.2057	0.3478	0.1479	0.001	0.2756	0.3768	0.0843	0.4784	0.1602	0.0861	0.4888	0.0016	0.2017	0.4049	0.1129	0.0649	0.1238	0.4163	0.4714	0.0725	0.4699	0.3134	0.2882	0.0421	0.2798	0.2733	0.2963	0.1186	0.2524	0.3707	0.4161	0.1338	0.0437	0.2216	0.1082	0.3333	0.3213	0.2954	0.2089	0.3225	0.1937	0.0053	0.411	0.1828	0.3834
U3-55K	0.0539	0.0015	0.0529	0.095	0.1267	0.0044	0.4222	0.2303	0.0425	0.0004	0.1898	0.3576	0.0582	0.4734	0.0007	0.3491	0.3914	0.0325	0.3875	0.0525	0.0475	0.0898	0.0047	0.4371	0.193	0.4203	0.0066	0.4639	0.0471	0.1457	0.0918	0.0145	0.2868	0.2231	0.354	0.1568	0.0109	0.0921	0.0508	0.0027	0.0091	0.508	0.28	0.0024	0.0564	0.2544	0.1247	0.0054	0.1181
fln	0.4619	0.4792	0.3613	0.4332	0.2417	0.1897	0.2553	0.1558	0.1312	0.408	0.2955	0.3204	0.2375	0.4287	0.2144	0.2971	0.0815	0.3916	0.2688	0.1568	0.428	0.1889	0.2842	0.0358	0.177	0.129	0.2997	0.3332	0.1492	0.0981	0.1176	0.3138	0.0427	0.1881	0.5019	0.4015	0.5123	0.0188	0.2723	0.1195	0.4616	0.2733	0.0735	0.1803	0.4567	0.3234	0.3817	0.188	0.3439
Pdk	0.3698	0.182	0.052	0.1792	0.1731	0.2675	0.3078	0.0394	0.0552	0.2595	0.3859	0.4919	0.043	0.3264	0.4166	0.0451	0.1477	0.3106	0.4088	0.0673	0.5201	0.3416	0.2925	0.007	0.0878	0.0074	0.3598	0.0302	0.0523	0.0115	0.2596	0.1605	0.3818	0.1788	0.1977	0.2577	0.1222	0.4242	0.3448	0.3309	0.2221	0.0937	0.0105	0.4925	0.5092	0.1027	0.2597	0.437	0.2455
Cp16	0.3421	0.1152	0.0416	0.0005	0.1376	0.3665	0.4429	0.135	0.1319	0.2327	0.246	0.4201	0.3328	0.1784	0.3815	0.3691	0.4435	0.0706	0.3158	0.1694	0.4543	0.3168	0.071	0.1134	0.4128	0.2087	0.154	0.2717	0.1416	0.1408	0.3977	0.0062	0.2495	0.0426	0.1265	0.4773	0.041	0.0665	0.2605	0.4433	0.1948	0.3332	0.1802	0.3611	0.2413	0.1853	0.3255	0.2114	0.0942
Best2	0.1479	0.0414	0.0949	0.0685	0.0064	0.0047	0.4317	0.4814	0.2741	0.0349	0.1214	0.4106	0.3106	0.471	0.0263	0.1539	0.2104	0.0475	0.494	0.3495	0.156	0.2588	0.007	0.2831	0.4963	0.0179	0.0158	0.1526	0.2486	0.3909	0.0316	0.0101	0.1515	0.0103	0.2325	0.213	0.0502	0.0037	0.1561	0.0401	0.0546	0.1976	0.0058	0.0162	0.2171	0.2392	0.2678	0.0225	0.2275
CG33230	0.5033	0.3147	0.0295	0.0537	0.4595	0.4019	0.4543	0.3183	0.302	0.3327	0.3258	0.0611	0.4449	0.4178	0.2858	0.1771	0.0494	0.3112	0.4615	0.4387	0.3959	0.2993	0.3194	0.5184	0.0945	0.4356	0.4058	0.1814	0.3271	0.3362	0.4839	0.1371	0.0156	0.3131	0.4621	0.4057	0.2557	0.0516	0.4413	0.1718	0.4248	0.1502	0.3475	0.211	0.4095	0.2657	0.1259	0.1175	0.181
CG13369	0.4567	0.221	0.1305	0.1033	0.1458	0.312	0.1546	0.2564	0.1755	0.2888	0.4269	0.3261	0.2477	0.2155	0.2926	0.3754	0.3835	0.2298	0.3041	0.2783	0.3765	0.4184	0.0249	0.284	0.2884	0.0449	0.1039	0.2337	0.1464	0.1634	0.0966	0.0163	0.1004	0.0867	0.0233	0.2468	0.075	0.0122	0.3076	0.2251	0.2538	0.0843	0.0874	0.3023	0.2362	0.3519	0.4173	0.2327	0.4349
dpr6	0.0235	0.0815	0.3746	0.3205	0.489	0.2108	0.0594	0.3583	0.2924	0.0759	0.276	0.4797	0.25	0.2247	0.1249	0.4663	0.3582	0.1229	0.1144	0.1318	0.0123	0.021	0.4048	0.4997	0.4517	0.1064	0.2689	0.3526	0.32	0.4386	0.3873	0.4831	0.137	0.3881	0.1396	0.0218	0.4009	0.1273	0.0385	0.2756	0.1379	0.093	0.2517	0.1266	0.0148	0.2217	0.1996	0.1788	0.0879
Alg-2	0.0333	0.003	0.0909	0.0944	0.4529	0.251	0.0783	0.2059	0.0384	0.0449	0.3793	0.4457	0.0268	0.0659	0.0849	0.4825	0.2684	0.0092	0.4244	0.0268	0.0261	0.092	0.0363	0.2007	0.3333	0.1606	0.054	0.3841	0.0238	0.1031	0.1985	0.11	0.3835	0.4214	0.1603	0.0827	0.1432	0.4436	0.0207	0.1454	0.0813	0.1914	0.3825	0.0111	0.0296	0.1529	0.4925	0.0454	0.0117
CG3906	0.3716	0.4015	0.4681	0.4883	0.0518	0.286	0.3553	0.1134	0.2632	0.3205	0.0664	0.2985	0.0279	0.1702	0.4129	0.1384	0.2947	0.3088	0.2926	0.0386	0.4202	0.1685	0.4582	0.1206	0.2352	0.0301	0.3501	0.0972	0.2106	0.3669	0.491	0.3972	0.3916	0.0821	0.3869	0.4301	0.4206	0.1033	0.3245	0.3297	0.3186	0.1341	0.0542	0.3862	0.2025	0.4847	0.2485	0.1888	0.1801
CG4009	0.1251	0.4103	0.2126	0.1675	0.436	0.4402	0.0547	0.0208	0.3335	0.4989	0.2984	0.3329	0.4022	0.0056	0.3896	0.0387	0.1883	0.2557	0.2099	0.1985	0.0796	0.3732	0.4812	0.1509	0.5097	0.4689	0.328	0.2319	0.3736	0.2608	0.2051	0.1103	0.2455	0.4782	0.4868	0.0638	0.0544	0.1137	0.0356	0.442	0.4344	0.4519	0.38	0.1818	0.0598	0.0013	0.2271	0.4523	0.3367
CG11381	0.1998	0.4093	0.1894	0.1366	0.463	0.4613	0.1258	0.0482	0.4449	0.4391	0.5237	0.2168	0.3911	0.0044	0.3306	0.069	0.303	0.2875	0.2404	0.3507	0.1125	0.3303	0.4492	0.2031	0.3497	0.3938	0.3339	0.3036	0.4999	0.3199	0.145	0.1269	0.2666	0.3531	0.4441	0.1055	0.0921	0.1163	0.0411	0.4273	0.4704	0.4343	0.4429	0.1706	0.0518	0.0052	0.1681	0.4403	0.3573
Ttd14	0.3092	0.3028	0.0564	0.1216	0.4704	0.3963	0.0419	0.0841	0.1115	0.3698	0.4793	0.4137	0.1711	0.0601	0.4635	0.131	0.1728	0.5376	0.3723	0.1246	0.1954	0.3453	0.2134	0.074	0.1898	0.3436	0.3258	0.2989	0.1122	0.0582	0.3778	0.05	0.1413	0.3554	0.1283	0.0751	0.075	0.1164	0.0727	0.3209	0.267	0.428	0.4884	0.3867	0.106	0.0218	0.2457	0.4716	0.3897
lama	0.2482	0.4504	0.4515	0.1698	0.2981	0.2411	0.309	0.1367	0.1856	0.4718	0.0777	0.0955	0.0912	0.3965	0.3077	0.341	0.2682	0.1734	0.2818	0.0706	0.3507	0.2222	0.2363	0.0049	0.358	0.5715	0.4658	0.5424	0.1056	0.2958	0.2154	0.219	0.4617	0.4894	0.0268	0.4883	0.2144	0.4756	0.2707	0.3347	0.2187	0.3024	0.3521	0.4358	0.3299	0.3926	0.0225	0.1911	0.1109
CG33981	0.0923	0.088	0.1871	0.4384	0.1975	0.0262	0.4412	0.2589	0.3248	0.0437	0.1142	0.4577	0.2907	0.1675	0.0017	0.1632	0.1996	0.2764	0.1963	0.4537	0.0714	0.4237	0.1241	0.0615	0.3241	0.6247	0.0318	0.4443	0.324	0.3989	0.1397	0.3393	0.2494	0.3595	0.408	0.2045	0.3703	0.2613	0.0146	0.0044	0.0572	0.4247	0.1999	0.0107	0.0294	0.0616	0.1183	0.1597	0.5079
CG9864	0.1892	0.0229	0.0123	0.003	0.0892	0.1307	0.4312	0.1318	0.0434	0.0556	0.1568	0.5082	0.167	0.2576	0.106	0.456	0.4654	0.0281	0.4823	0.1118	0.244	0.2427	0.0053	0.2085	0.3201	0.1971	0.0236	0.2756	0.0483	0.0593	0.2421	0.0008	0.2009	0.0692	0.1186	0.3945	0.0156	0.0443	0.4243	0.1342	0.0425	0.3239	0.1743	0.131	0.4684	0.3848	0.1858	0.114	0.0992
mio	0.2887	0.2357	0.4412	0.2934	0.1116	0.419	0.4712	0.173	0.1366	0.1677	0.2391	0.3454	0.021	0.219	0.1849	0.2821	0.2503	0.3662	0.4159	0.0648	0.1849	0.1739	0.4873	0.304	0.0584	0.0367	0.4336	0.1122	0.1271	0.1788	0.4266	0.3277	0.3089	0.0595	0.3861	0.3574	0.4031	0.0812	0.1077	0.1516	0.323	0.1033	0.068	0.2551	0.0316	0.3531	0.385	0.3024	0.2828
HINT1	0.0649	0.0818	0.1267	0.3342	0.2506	0.0464	0.2765	0.5329	0.3964	0.0493	0.0687	0.1535	0.4405	0.2734	0.0271	0.4002	0.0769	0.2364	0.4719	0.3373	0.0577	0.265	0.325	0.1575	0.3641	0.2887	0.1437	0.3823	0.5465	0.5263	0.4568	0.348	0.4097	0.363	0.1037	0.0791	0.3465	0.4297	0.0423	0.0682	0.0582	0.0629	0.395	0.0453	0.0447	0.2241	0.0126	0.1842	0.2989
hdc	0.2222	0.3575	0.2595	0.2681	0.3793	0.3486	0.1923	0.4031	0.1161	0.4803	0.3843	0.1062	0.177	0.2555	0.4215	0.2619	0.153	0.2466	0.4835	0.2253	0.1747	0.143	0.4799	0.2053	0.0622	0.1488	0.4245	0.3425	0.1098	0.134	0.5033	0.2825	0.0382	0.212	0.3426	0.228	0.3552	0.0172	0.3486	0.2752	0.3978	0.4649	0.1636	0.4551	0.2289	0.2069	0.2	0.2874	0.2639
ImpL2	0.2838	0.0567	0.34	0.3537	0.137	0.0196	0.1331	0.0881	0.0366	0.0055	0.4815	0.0617	0.0336	0.1327	0.0115	0.4218	0.1215	0.2688	0.1601	0.0326	0.1877	0.0602	0.0497	0.4527	0.0416	0.3837	0.0385	0.524	0.0405	0.1082	0.1376	0.0404	0.3795	0.3413	0.5	0.3224	0.0019	0.1642	0.2584	0.0105	0.054	0.2462	0.3627	0.0983	0.1391	0.4591	0.2619	0.0671	0.4048
Ntan1	0.3551	0.2042	0.0441	0.1774	0.4345	0.2896	0.3376	0.1023	0.0505	0.4146	0.3604	0.3196	0.1463	0.3008	0.4526	0.2611	0.2255	0.3011	0.2512	0.1295	0.4618	0.4414	0.2547	0.02	0.1397	0.2995	0.2891	0.3338	0.0514	0.0052	0.255	0.1489	0.3246	0.4931	0.1052	0.2263	0.1504	0.4749	0.2013	0.4888	0.1811	0.3106	0.275	0.4036	0.2619	0.1685	0.2429	0.3312	0.3726
CG3756	0.0514	0.1028	0.3479	0.4193	0.3284	0.2413	0.1043	0.4102	0.0982	0.1313	0.3433	0.0927	0.1532	0.2567	0.2246	0.1576	0.2682	0.0848	0.2723	0.1705	0.0178	0.0083	0.2588	0.3912	0.1028	0.3432	0.1605	0.2702	0.0966	0.1846	0.3426	0.4913	0.0218	0.4915	0.4654	0.0249	0.3889	0.0672	0.1146	0.4625	0.14	0.4584	0.3801	0.2167	0.043	0.0943	0.4056	0.4032	0.1811
lncRNA:CR43650	0.1484	0.0044	0.0759	0.0726	0.1257	0.0118	0.3172	0.1006	0.0239	0.0013	0.3164	0.2371	0.0272	0.3564	0.0028	0.4325	0.4161	0.046	0.2966	0.0231	0.1155	0.0646	0.003	0.4236	0.1369	0.3783	0.0088	0.4666	0.0243	0.0897	0.0781	0.0046	0.3178	0.1984	0.2576	0.2473	0.0012	0.0692	0.1546	0.003	0.0266	0.3806	0.2457	0.0128	0.1245	0.3898	0.2095	0.0065	0.1351
CG5112	0.2427	0.2335	0.1847	0.3554	0.017	0.0096	0.3934	0.2746	0.4099	0.0827	0.3593	0.0084	0.3958	0.3145	0.062	0.0356	0.3016	0.296	0.1868	0.4801	0.1105	0.081	0.1291	0.07	0.227	0.0462	0.0793	0.0399	0.4049	0.3528	0.0304	0.2884	0.1337	0.1174	0.3424	0.1004	0.2528	0.254	0.1203	0.1438	0.184	0.012	0.0534	0.1111	0.0936	0.0938	0.3934	0.1558	0.4754
Smyd5	0.3228	0.386	0.1687	0.1866	0.2672	0.3317	0.3613	0.5695	0.3989	0.2016	0.1629	0.1217	0.1599	0.1755	0.1811	0.4325	0.3467	0.4514	0.2467	0.2295	0.187	0.0762	0.4789	0.3444	0.2117	0.0857	0.4668	0.2664	0.3654	0.3782	0.2553	0.2734	0.1691	0.0977	0.2814	0.1607	0.536	0.1407	0.0987	0.1935	0.4811	0.4045	0.1839	0.203	0.0402	0.1364	0.2737	0.1622	0.3742
smt3	0.0398	0.0002	0.0508	0.0367	0.2205	0.1659	0.1989	0.1443	0.0012	0.0148	0.2702	0.2952	0.0209	0.2411	0.0451	0.3743	0.4066	0.0009	0.403	0.0129	0.0298	0.0532	0.0018	0.1608	0.1933	0.4736	0.008	0.3568	0.0012	0.0373	0.1278	0.018	0.4069	0.1943	0.1004	0.1022	0.0377	0.3479	0.0893	0.0985	0.0255	0.4142	0.3245	0.0161	0.0853	0.2357	0.411	0.0321	0.0127
Obp99b	0.0134	0.0067	0.0582	0.0502	0.0022	0.0031	0.3205	0.4287	0.1802	0.0153	0.0237	0.4728	0.3239	0.4535	0.0164	0.1259	0.1609	0.0095	0.4588	0.2931	0.0316	0.1551	0.008	0.2976	0.5039	0.1378	0.0038	0.134	0.1817	0.2934	0.0866	0.018	0.305	0.0077	0.3472	0.0716	0.0947	0.056	0.0847	0.0536	0.0082	0.3275	0.0248	0.0084	0.119	0.1659	0.1372	0.0545	0.1082
mRpL2	0.0012	0.0172	0.253	0.2667	0.0867	0.0927	0.0614	0.4686	0.1206	0.061	0.0231	0.4607	0.3614	0.3201	0.1152	0.1565	0.3378	0.0449	0.3307	0.2329	0.0036	0.0411	0.1756	0.4373	0.3618	0.3661	0.0541	0.1894	0.1525	0.1824	0.4879	0.3083	0.1429	0.2185	0.306	0.008	0.3428	0.2762	0.0598	0.3437	0.0072	0.3491	0.3959	0.0929	0.0425	0.1261	0.1342	0.3657	0.1627
shn	0.1341	0.0038	0.0671	0.1183	0.3716	0.0892	0.4207	0.0762	0.0081	0.0011	0.4262	0.2393	0.0036	0.4701	0.0068	0.4251	0.305	0.0302	0.3549	0.0061	0.0927	0.0319	0.0158	0.1922	0.0582	0.3633	0.0268	0.314	0.0061	0.0459	0.1923	0.0358	0.4301	0.4423	0.2426	0.2611	0.0172	0.3211	0.1369	0.0097	0.0388	0.3508	0.4503	0.0246	0.0802	0.3886	0.2363	0.022	0.0473
scf	0.1547	0.3291	0.3425	0.4732	0.028	0.1026	0.1473	0.0018	0.3032	0.4144	0.1132	0.2619	0.1697	0.1973	0.3092	0.0013	0.0969	0.1328	0.3234	0.0906	0.139	0.4333	0.1598	0.0316	0.2592	0.066	0.1269	0.0047	0.3381	0.1614	0.0279	0.3958	0.4244	0.0414	0.3648	0.0564	0.3007	0.2381	0.1512	0.5037	0.2848	0.08	0.0131	0.133	0.257	0.0249	0.2799	0.3574	0.3602
CG43074	0.4394	0.3144	0.4502	0.2601	0.0777	0.1697	0.5042	0.1655	0.4031	0.5034	0.2368	0.1588	0.3683	0.2671	0.4711	0.1026	0.5314	0.2733	0.3497	0.3238	0.5186	0.3641	0.0607	0.44	0.384	0.0144	0.207	0.1258	0.3806	0.5133	0.0209	0.1325	0.3798	0.0782	0.1472	0.4839	0.2169	0.004	0.5189	0.553	0.3203	0.0193	0.0503	0.3437	0.3105	0.3456	0.2427	0.3128	0.5395
Dera	0.3562	0.3281	0.2542	0.2708	0.0796	0.1817	0.3621	0.1724	0.223	0.3884	0.1092	0.4661	0.0264	0.0727	0.4434	0.1888	0.4773	0.1917	0.361	0.0788	0.4735	0.3677	0.2916	0.0542	0.319	0.1506	0.4964	0.1621	0.1324	0.249	0.327	0.386	0.2068	0.1926	0.0648	0.4208	0.3792	0.3592	0.379	0.3067	0.3357	0.1902	0.1699	0.2773	0.3701	0.4802	0.1882	0.1438	0.1039
CG12744	0.2977	0.3446	0.1713	0.3617	0.1741	0.3366	0.3358	0.4381	0.1303	0.3962	0.4869	0.0223	0.3212	0.3294	0.4706	0.1172	0.078	0.2666	0.2848	0.3239	0.2238	0.1	0.3118	0.3715	0.1018	0.2981	0.2779	0.0718	0.1374	0.2027	0.3107	0.4669	0.0159	0.3084	0.3455	0.2043	0.3913	0.2206	0.4541	0.2571	0.327	0.0758	0.3855	0.4177	0.3907	0.271	0.1849	0.3413	0.4574
asRNA:CR43430	0.1697	0.1266	0.3707	0.5034	0.4634	0.3899	0.1587	0.2231	0.0983	0.147	0.3077	0.0563	0.0445	0.1773	0.2421	0.3139	0.2269	0.0583	0.2742	0.098	0.073	0.0114	0.2097	0.2223	0.0794	0.1853	0.2343	0.4031	0.0758	0.1642	0.2198	0.4135	0.0901	0.3658	0.2863	0.0819	0.2603	0.1028	0.1499	0.3825	0.2888	0.4606	0.2629	0.1977	0.0678	0.147	0.19	0.2064	0.0577
NiPp1	0.393	0.0913	0.0143	0.0686	0.2924	0.1395	0.0972	0.0718	0.142	0.0609	0.3111	0.3019	0.1701	0.1548	0.0671	0.2207	0.4959	0.3305	0.4564	0.1184	0.4753	0.4507	0.0782	0.3608	0.3543	0.3741	0.1082	0.2751	0.1538	0.1374	0.3929	0.0098	0.0691	0.2786	0.3583	0.3119	0.0117	0.0171	0.474	0.0238	0.0986	0.3936	0.3345	0.167	0.488	0.184	0.0535	0.0969	0.4002
CG34324	0.4711	0.365	0.4845	0.3531	0.0643	0.3875	0.4442	0.178	0.2424	0.2736	0.1421	0.3801	0.0279	0.1323	0.2996	0.2103	0.3297	0.3518	0.4199	0.0707	0.307	0.2138	0.459	0.2422	0.1492	0.0303	0.4307	0.0981	0.2092	0.3094	0.4625	0.2995	0.4065	0.0529	0.4999	0.4136	0.5171	0.0836	0.1548	0.2373	0.4528	0.1044	0.0596	0.3057	0.0746	0.395	0.4392	0.2559	0.204
CG12158	0.3949	0.0859	0.0139	0.0145	0.4812	0.3471	0.2379	0.016	0.1227	0.0631	0.4753	0.3855	0.0744	0.2149	0.1334	0.0356	0.3982	0.2282	0.2551	0.0393	0.4622	0.2589	0.1204	0.1192	0.3316	0.356	0.2183	0.0733	0.1166	0.125	0.4626	0.0181	0.1398	0.3846	0.3222	0.3441	0.0151	0.1178	0.4982	0.0697	0.2017	0.1798	0.4126	0.2342	0.4539	0.0827	0.1274	0.0493	0.1209
Rab39	0.4674	0.2778	0.0204	0.0885	0.3872	0.3982	0.3171	0.0294	0.1674	0.3684	0.3061	0.0752	0.3653	0.1312	0.5005	0.0385	0.4511	0.4743	0.3884	0.1448	0.3608	0.4413	0.4774	0.0813	0.4725	0.1832	0.4872	0.1427	0.2248	0.088	0.0555	0.139	0.2224	0.4413	0.4626	0.2322	0.118	0.3355	0.1867	0.4404	0.2423	0.0894	0.1957	0.3618	0.2263	0.0268	0.0257	0.4723	0.378
Cpsf5	0.088	0.4384	0.0849	0.2039	0.169	0.2556	0.084	0.2204	0.422	0.4624	0.1931	0.1748	0.2653	0.4133	0.4719	0.0572	0.4245	0.3654	0.2566	0.3095	0.0724	0.1224	0.3714	0.2061	0.427	0.5215	0.4032	0.0463	0.4067	0.3531	0.5021	0.1752	0.002	0.3748	0.1582	0.0384	0.2241	0.0711	0.2457	0.1897	0.3268	0.2871	0.4665	0.5049	0.1775	0.0953	0.3904	0.2439	0.5263
RFeSP	0.2251	0.4261	0.2669	0.1257	0.264	0.2726	0.2188	0.3343	0.398	0.3196	0.3869	0.5452	0.4117	0.3508	0.2575	0.4161	0.2713	0.4444	0.4519	0.3629	0.2665	0.3519	0.1618	0.3776	0.2349	0.1323	0.3445	0.364	0.44	0.2727	0.0947	0.0933	0.0343	0.161	0.2632	0.3156	0.159	0.0008	0.5158	0.1317	0.4499	0.2067	0.1447	0.2273	0.3802	0.3693	0.4316	0.0366	0.4044
CG10068	0.0769	0.0227	0.15	0.4343	0.3834	0.0741	0.3587	0.3538	0.083	0.0114	0.3207	0.3191	0.0272	0.1992	0.0018	0.2918	0.4705	0.1518	0.2866	0.1289	0.054	0.1983	0.0405	0.3818	0.065	0.3355	0.019	0.3389	0.0663	0.1435	0.1054	0.1923	0.316	0.4195	0.337	0.2434	0.1645	0.3434	0.0102	0.0011	0.0293	0.3574	0.4917	0.0072	0.0134	0.1094	0.2156	0.0765	0.2774
CG14309	0.054	0.1711	0.3183	0.3956	0.0426	0.0576	0.1105	0.0024	0.5319	0.2076	0.1106	0.191	0.4111	0.0988	0.1328	0.0028	0.1651	0.0871	0.3355	0.285	0.0319	0.2362	0.1193	0.0444	0.4894	0.1317	0.0562	0.0049	0.4566	0.3631	0.0271	0.5068	0.2827	0.1081	0.4237	0.0198	0.3544	0.4477	0.0246	0.2975	0.1533	0.1281	0.0292	0.058	0.0602	0.0023	0.3078	0.2939	0.3558
Pbgs	0.1017	0.2646	0.3119	0.4777	0.3295	0.4025	0.124	0.5093	0.4052	0.27	0.1878	0.1217	0.4521	0.1782	0.2698	0.3429	0.1471	0.3895	0.3619	0.4174	0.1092	0.2978	0.2935	0.356	0.2862	0.0672	0.4966	0.155	0.3577	0.3784	0.1561	0.2703	0.3884	0.218	0.0482	0.1268	0.3024	0.1413	0.0912	0.3646	0.2422	0.0072	0.1416	0.2604	0.0793	0.3239	0.0656	0.426	0.2692
CG3902	0.2028	0.1157	0.0263	0.0859	0.4747	0.5222	0.4694	0.0641	0.0755	0.2172	0.2316	0.222	0.1911	0.1981	0.3863	0.1457	0.3087	0.2677	0.4135	0.099	0.3459	0.309	0.3176	0.059	0.2655	0.2359	0.2727	0.2557	0.0884	0.0334	0.125	0.1255	0.4754	0.5511	0.4454	0.4253	0.114	0.4914	0.3437	0.4128	0.1099	0.1141	0.227	0.5001	0.4614	0.1118	0.0482	0.4714	0.3068
eIF2Bbeta	0.1776	0.0446	0.3108	0.4828	0.3643	0.0483	0.2645	0.2752	0.0275	0.006	0.4485	0.0909	0.0039	0.3938	0.0037	0.3564	0.2544	0.1895	0.4176	0.0348	0.0842	0.0821	0.0445	0.4328	0.0246	0.4546	0.034	0.3931	0.0251	0.1526	0.0759	0.1502	0.4875	0.4175	0.3784	0.2386	0.0538	0.3352	0.0316	0.0023	0.0652	0.4762	0.4687	0.0264	0.014	0.1569	0.3768	0.041	0.3298
Rpp14a	0.3383	0.3239	0.0268	0.1106	0.3576	0.2916	0.0968	0.1018	0.3962	0.3121	0.2909	0.1424	0.4988	0.1375	0.2988	0.212	0.3683	0.5241	0.3956	0.3847	0.2351	0.2049	0.2455	0.4331	0.3759	0.3009	0.3086	0.2034	0.4112	0.2359	0.4501	0.026	0.031	0.2524	0.3662	0.1321	0.0419	0.0082	0.2425	0.151	0.2455	0.3116	0.315	0.398	0.2278	0.1145	0.0505	0.2899	0.4927
Ciao1	0.0645	0.0234	0.0813	0.1792	0.4263	0.3163	0.2845	0.0795	0.0149	0.0607	0.2167	0.5166	0.0721	0.4919	0.1532	0.3786	0.3089	0.0712	0.3469	0.0319	0.0691	0.05	0.1887	0.1107	0.1182	0.0748	0.1209	0.3505	0.0209	0.0147	0.2992	0.1704	0.2786	0.4765	0.4905	0.1885	0.1327	0.2502	0.2411	0.2565	0.035	0.1104	0.1832	0.223	0.1379	0.4892	0.0994	0.3421	0.1036
CG5326	0.0175	0.0229	0.157	0.2522	0.068	0.0092	0.1956	0.2352	0.2248	0.0361	0.0483	0.4018	0.3253	0.0908	0.0129	0.0352	0.0786	0.0049	0.2494	0.4009	0.0154	0.2234	0.012	0.1478	0.4458	0.1779	0.0017	0.1509	0.2263	0.3323	0.033	0.1834	0.3505	0.1192	0.3268	0.0212	0.3225	0.2309	0.0127	0.0618	0.031	0.3201	0.1182	0.0016	0.0395	0.0169	0.2832	0.1029	0.0971
CG30423	0.0717	0.0248	0.1122	0.0471	0.0204	0.0657	0.2265	0.5083	0.1753	0.0791	0.0953	0.3314	0.292	0.2868	0.0811	0.0695	0.1818	0.0032	0.3651	0.2951	0.0783	0.2128	0.0006	0.4484	0.4742	0.092	0.0041	0.0561	0.1526	0.2475	0.0217	0.0279	0.2773	0.0111	0.0782	0.1016	0.1715	0.0789	0.1418	0.163	0.0545	0.1617	0.0164	0.0228	0.2117	0.1132	0.4872	0.071	0.0454
TTLL12	0.3475	0.4178	0.1808	0.1909	0.4539	0.2835	0.1997	0.2183	0.2758	0.3087	0.5269	0.1974	0.4476	0.391	0.2049	0.2183	0.1969	0.3864	0.4922	0.3926	0.318	0.2666	0.3653	0.3094	0.1884	0.1986	0.4383	0.1684	0.3236	0.2315	0.3674	0.1916	0.0227	0.2894	0.4442	0.3118	0.1611	0.0182	0.3518	0.0635	0.5435	0.3866	0.2117	0.2203	0.5194	0.305	0.2556	0.0608	0.5042
CG10513	0.4683	0.2299	0.1508	0.0165	0.3835	0.5422	0.4026	0.0225	0.1164	0.2591	0.4268	0.3749	0.1665	0.0493	0.4797	0.0617	0.1684	0.2688	0.0391	0.0703	0.4302	0.1471	0.2756	0.0421	0.3459	0.6317	0.4194	0.4314	0.1265	0.1168	0.3092	0.0438	0.4258	0.2477	0.3466	0.3825	0.0429	0.3043	0.1022	0.4997	0.307	0.4992	0.4227	0.384	0.2608	0.0119	0.3302	0.2637	0.1686
colt	0.256	0.327	0.098	0.146	0.257	0.2366	0.1102	0.0296	0.1203	0.4266	0.3015	0.4559	0.1314	0.0874	0.4222	0.012	0.0885	0.4176	0.4838	0.1173	0.1962	0.5417	0.3879	0.0109	0.1685	0.308	0.4802	0.0729	0.121	0.066	0.2088	0.1264	0.312	0.3529	0.2147	0.1013	0.1168	0.3651	0.0217	0.4448	0.3399	0.3176	0.1179	0.2644	0.1278	0.0008	0.2973	0.455	0.5407
Ctl2	0.3227	0.0789	0.1212	0.2103	0.1326	0.0717	0.1763	0.482	0.2375	0.0553	0.327	0.3804	0.1638	0.4691	0.0197	0.2648	0.3495	0.2016	0.2863	0.3174	0.2968	0.4162	0.0106	0.2798	0.2838	0.1122	0.0204	0.4204	0.1966	0.3275	0.0241	0.028	0.0787	0.1436	0.1679	0.4716	0.0606	0.0088	0.1551	0.0054	0.0954	0.2314	0.039	0.0227	0.2451	0.2783	0.3345	0.0473	0.3378
CG14834	0.1681	0.4179	0.1521	0.2374	0.275	0.3735	0.0558	0.0101	0.3579	0.4901	0.3375	0.174	0.3777	0.0243	0.4228	0.0089	0.2203	0.1952	0.2981	0.2155	0.1018	0.3112	0.3594	0.1465	0.4853	0.3218	0.2827	0.0573	0.3975	0.2487	0.0895	0.2018	0.2097	0.3304	0.3717	0.054	0.1085	0.2166	0.0694	0.392	0.4734	0.2096	0.2131	0.19	0.1103	0.0013	0.1016	0.4829	0.3134
Wsck	0.2185	0.2103	0.3758	0.2459	0.2536	0.4688	0.4033	0.1924	0.0201	0.255	0.4758	0.3663	0.0539	0.3814	0.318	0.4632	0.0995	0.424	0.3134	0.1227	0.2183	0.2678	0.4366	0.181	0.0049	0.0387	0.2915	0.2415	0.0269	0.0036	0.2892	0.3753	0.2184	0.0906	0.4351	0.4784	0.4405	0.064	0.325	0.3309	0.1573	0.2179	0.0633	0.4463	0.1804	0.3705	0.2863	0.2896	0.5066
Cka	0.2567	0.0177	0.123	0.0992	0.1558	0.0293	0.2208	0.0955	0.0256	0.0037	0.4577	0.1455	0.0193	0.2667	0.0091	0.4657	0.2489	0.0723	0.2715	0.0256	0.2002	0.0591	0.0025	0.3207	0.0846	0.2769	0.0174	0.4535	0.0232	0.0826	0.0613	0.0044	0.3606	0.2111	0.1835	0.3553	0.0002	0.0704	0.2463	0.0089	0.0673	0.2736	0.2431	0.0451	0.196	0.4668	0.3495	0.0116	0.1847
anox	0.1537	0.1034	0.0842	0.4714	0.235	0.3039	0.3166	0.1411	0.1294	0.0875	0.3705	0.2592	0.0699	0.3701	0.0771	0.2271	0.4448	0.4054	0.3851	0.1076	0.1923	0.3379	0.3562	0.3744	0.131	0.0731	0.2367	0.0646	0.1341	0.0989	0.2955	0.411	0.3402	0.1185	0.337	0.476	0.2344	0.353	0.1187	0.0394	0.0764	0.0389	0.1126	0.1654	0.087	0.5005	0.0257	0.3199	0.4134
CG7694	0.4681	0.1372	0.1608	0.16	0.1684	0.4167	0.4581	0.0209	0.1589	0.0853	0.2029	0.491	0.0202	0.3595	0.13	0.075	0.4441	0.221	0.2177	0.0076	0.3533	0.1447	0.247	0.1493	0.3066	0.1094	0.3666	0.045	0.1341	0.2398	0.4502	0.1741	0.2957	0.2096	0.4149	0.4405	0.0752	0.4677	0.2503	0.0692	0.3806	0.0899	0.1619	0.1559	0.173	0.3442	0.3493	0.0282	0.1074
RpS15Ab	0.0157	0.0006	0.1667	0.1724	0.1496	0.058	0.2185	0.4872	0.0772	0.0058	0.2254	0.2259	0.0599	0.1028	0.0042	0.1423	0.2512	0.0074	0.4923	0.1094	0.0069	0.0653	0.0057	0.3791	0.2404	0.4996	0.0031	0.3037	0.0577	0.237	0.0277	0.0946	0.4144	0.2062	0.2266	0.0406	0.14	0.3061	0.0005	0.0214	0.0215	0.4783	0.1882	0.0005	0.0046	0.0303	0.4248	0.0168	0.0491
CHOp24	0.108	0.1063	0.4825	0.3903	0.3431	0.0626	0.3756	0.145	0.0807	0.0206	0.4114	0.1618	0.1044	0.2792	0.0418	0.4869	0.1513	0.353	0.1169	0.0535	0.057	0.0337	0.3141	0.3439	0.0748	0.1954	0.1661	0.2967	0.1266	0.2221	0.4893	0.381	0.0761	0.2872	0.1009	0.1425	0.1251	0.3048	0.108	0.0816	0.0584	0.3215	0.2474	0.1749	0.0137	0.3573	0.1336	0.2262	0.559
wdb	0.0466	0.1709	0.2875	0.4142	0.3493	0.3209	0.0358	0.5431	0.183	0.414	0.2476	0.3573	0.3045	0.0577	0.4908	0.3633	0.3404	0.1287	0.2982	0.3472	0.0774	0.2628	0.4347	0.1967	0.3484	0.1485	0.3301	0.427	0.1866	0.1481	0.3282	0.3344	0.2871	0.3133	0.3481	0.1441	0.2896	0.0418	0.1857	0.339	0.2248	0.1447	0.2251	0.3447	0.1804	0.1717	0.4374	0.3579	0.1477
CG8010	0.4408	0.3431	0.0535	0.164	0.2758	0.2074	0.1385	0.3616	0.3823	0.2729	0.2047	0.1321	0.3883	0.2264	0.1894	0.3041	0.2157	0.4852	0.4136	0.438	0.3324	0.226	0.2541	0.3128	0.2636	0.1955	0.2759	0.277	0.3629	0.5573	0.4494	0.0832	0.0279	0.2051	0.4836	0.2589	0.1433	0.0051	0.4314	0.0885	0.2503	0.3505	0.1517	0.2627	0.3326	0.233	0.0473	0.221	0.4328
CG8034	0.3941	0.1495	0.0161	0.0234	0.3753	0.3742	0.1448	0.0323	0.1189	0.0753	0.5164	0.5753	0.1018	0.1041	0.2077	0.0303	0.2239	0.2887	0.251	0.0796	0.5175	0.2171	0.1121	0.0953	0.2081	0.4737	0.2554	0.1023	0.1209	0.1152	0.3862	0.0166	0.2939	0.3509	0.3258	0.2995	0.0151	0.2323	0.3597	0.1574	0.1834	0.357	0.4032	0.3698	0.5153	0.0196	0.1753	0.1567	0.255
Tsp96F	0.0011	0.0019	0.1446	0.0872	0.1088	0.0832	0.0728	0.2559	0.0312	0.0169	0.0805	0.3606	0.1487	0.3227	0.055	0.2439	0.3698	0.0023	0.2221	0.0587	0.0008	0.0092	0.0534	0.3629	0.3025	0.4062	0.0254	0.2853	0.0381	0.1025	0.3006	0.0995	0.2417	0.1842	0.4709	0.0107	0.1208	0.4298	0.055	0.1963	0.0074	0.3828	0.4043	0.037	0.0348	0.1689	0.2087	0.1158	0.015
CG14657	0.1117	0.0819	0.4413	0.2064	0.0366	0.1071	0.2156	0.3003	0.0427	0.0972	0.3007	0.0386	0.2516	0.2491	0.2236	0.1938	0.22	0.0833	0.0662	0.1014	0.0699	0.0075	0.1219	0.4116	0.2437	0.2836	0.1038	0.0382	0.0646	0.2012	0.2424	0.1193	0.0377	0.0789	0.4717	0.0524	0.0914	0.4722	0.3792	0.4712	0.1204	0.1413	0.2795	0.2774	0.2274	0.3321	0.4268	0.2333	0.1854
CG8206	0.0774	0.5073	0.2777	0.1385	0.4902	0.4193	0.0773	0.1423	0.3935	0.3148	0.1532	0.4361	0.272	0.0868	0.3514	0.0667	0.3578	0.384	0.1719	0.1867	0.1308	0.5291	0.3094	0.3175	0.423	0.2628	0.4628	0.2356	0.3815	0.5456	0.3758	0.0717	0.1258	0.3272	0.3802	0.1629	0.0652	0.0262	0.1917	0.1789	0.3687	0.3759	0.3588	0.462	0.2285	0.042	0.4662	0.0798	0.496
CG5114	0.1513	0.2591	0.0277	0.1459	0.2514	0.3931	0.4297	0.3375	0.557	0.4737	0.0025	0.0258	0.2138	0.434	0.4465	0.4567	0.0642	0.2787	0.1036	0.2209	0.4362	0.15	0.3499	0.4307	0.1787	0.3181	0.276	0.4687	0.4079	0.3386	0.3031	0.2479	0.0804	0.1257	0.4226	0.4795	0.4229	0.1697	0.5534	0.4519	0.1247	0.1846	0.1887	0.3595	0.3068	0.3826	0.03	0.3928	0.3187
SsRbeta	0.0771	0.002	0.1318	0.1421	0.2555	0.0534	0.4982	0.2024	0.018	0.0017	0.4149	0.1749	0.0077	0.2799	0.0024	0.339	0.4781	0.026	0.3865	0.0111	0.0416	0.0542	0.0066	0.4587	0.1221	0.4445	0.0109	0.4514	0.0092	0.121	0.0458	0.0344	0.3627	0.3637	0.2136	0.1338	0.0119	0.205	0.0221	0.0031	0.0341	0.511	0.3895	0.0021	0.0204	0.1684	0.3686	0.0037	0.0656
sqh	0.0627	0.05	0.1767	0.4719	0.408	0.1519	0.4691	0.1798	0.1363	0.0265	0.2842	0.4266	0.0826	0.3033	0.0267	0.3778	0.4991	0.2602	0.3981	0.0957	0.0469	0.1206	0.2989	0.4906	0.1612	0.0643	0.1613	0.1259	0.1492	0.1812	0.4163	0.3985	0.4233	0.189	0.2119	0.1827	0.2315	0.2779	0.0322	0.0368	0.0467	0.0517	0.1417	0.075	0.012	0.2866	0.0495	0.1961	0.2707
CG13492	0.0989	0.0165	0.0035	0.0291	0.2614	0.1222	0.4829	0.1594	0.1658	0.0303	0.0951	0.1534	0.2186	0.4636	0.0393	0.3141	0.1899	0.1154	0.447	0.137	0.1574	0.2956	0.0793	0.4005	0.4579	0.4831	0.0653	0.3278	0.1758	0.1811	0.4725	0.0314	0.1232	0.2746	0.4919	0.3128	0.0611	0.1079	0.1937	0.0386	0.0265	0.1495	0.3752	0.0552	0.2216	0.4086	0.0134	0.0762	0.1426
CG6724	0.1099	0.0977	0.0846	0.443	0.1912	0.3846	0.4964	0.1747	0.1317	0.1229	0.3268	0.2345	0.0831	0.2366	0.1337	0.2431	0.4747	0.312	0.3479	0.118	0.1234	0.3161	0.3903	0.3053	0.1686	0.0427	0.2691	0.0848	0.1355	0.1061	0.2582	0.502	0.4122	0.1086	0.36	0.3785	0.3191	0.2203	0.0996	0.1111	0.0853	0.0196	0.0885	0.1808	0.0712	0.4137	0.0411	0.3725	0.2517
CG2003	0.2157	0.3213	0.3403	0.3888	0.0137	0.055	0.4655	0.0467	0.3576	0.3713	0.0353	0.4162	0.1235	0.4295	0.2406	0.0495	0.13	0.395	0.2298	0.0968	0.2946	0.2881	0.1591	0.0308	0.2659	0.0223	0.0986	0.0639	0.337	0.3388	0.135	0.2445	0.2339	0.0236	0.4628	0.3271	0.5338	0.0394	0.282	0.306	0.168	0.1123	0.0062	0.195	0.4678	0.1946	0.2906	0.4583	0.3058
[truncated: 290 more columns]

## Sheet: cor_coef_pvalue_EF_outliers
ID	CR41620	DPCoAC	trio	EbpIII	CR41607	CG31760	CG5805	ND-42	pAbp	mlt	vri	Fur1	alpha-Spec	Vha55	yps	Rgk1	CHES-1-like	Wbp2	CG6115	CG17691	Alas	blow	mtTFB1	Rtnl1	Chchd3	CG7766	CG42518	Pglym78	ND-B22	Patronin	ATPsynCF6	CG4615	Sema5c	CG6424	zfh1	MICU3	Gdh	Vps13	CG16721	ND-B14.5A	Psa	Atf3	alpha-Est3	Adk3	Nep2	CG33056	atilla	CG42354	rudhira
CR41620	1	-0.0686521	0.815999	-0.101926	-0.472045	0.462297	0.701356	-0.581416	-0.160834	0.268372	0.400702	0.615253	0.722854	-0.476042	0.826772	0.34522	0.783269	-0.131261	-0.299937	-0.0840787	-0.59614	0.0836406	-0.51772	-0.485963	-0.535266	0.37086	-0.618897	-0.570753	-0.571933	0.872943	-0.589718	0.0104878	0.373841	0.799743	0.726412	0.731546	-0.388926	0.754804	-0.0508886	-0.485506	-0.019145	0.812835	-0.0813865	0.656442	0.266903	0.726158	-0.0674295	-0.107551	0.891526
DPCoAC	0.4567	1	-0.543733	0.0710196	0.598408	0.0450251	-0.411505	0.529151	0.239581	0.165306	-0.0600205	-0.45766	-0.0915666	0.874652	-0.235066	-0.319021	-0.478365	0.618714	0.320909	0.502751	0.11524	-0.0789881	-0.206982	0.669558	0.636723	-0.555374	0.780187	0.609452	0.539007	-0.377851	0.555924	0.112899	0.00561119	-0.294055	-0.43384	-0.366072	0.800706	-0.300992	0.393116	0.412526	0.451899	0.086924	0.577884	-0.629492	-0.320952	0.0182158	0.0993437	-0.047878	-0.332776
trio	0.0033	0.0907	1	-0.179964	-0.835657	0.23895	0.665026	-0.876045	-0.272374	-0.0419207	0.296564	0.863194	0.506875	-0.797323	0.793151	0.225902	0.84845	-0.5596	-0.51186	-0.370184	-0.642623	-0.0798428	-0.298103	-0.818814	-0.863935	0.465783	-0.938698	-0.905705	-0.872068	0.938614	-0.887934	-0.152386	0.187027	0.78379	0.924001	0.787799	-0.789403	0.879201	-0.389806	-0.771911	-0.218323	0.5622	-0.279274	0.785335	0.270463	0.505012	-0.192485	0.113565	0.834292
EbpIII	0.3677	0.4474	0.3772	1	0.532795	0.797073	-0.504476	0.47456	0.940587	0.770642	0.685551	-0.384252	0.517107	0.257289	0.22965	0.453486	0.245398	0.318719	0.693624	0.676358	0.190191	0.782974	-0.744845	0.589006	0.513765	-0.208332	0.106843	0.270027	0.486033	-0.418516	0.487482	0.079241	0.864152	0.366501	-0.487237	0.388904	0.375339	-0.0437823	0.699061	0.533335	0.0602085	0.476966	-0.226278	-0.103181	0.719013	0.569189	0.840831	-0.0361931	0.165876
CR41607	0.1164	0.0904	0.1169	0.0243	1	0.298723	-0.524547	0.964257	0.596762	0.5237	0.0488974	-0.851978	0.0258476	0.726425	-0.41728	0.204289	-0.47791	0.789925	0.75592	0.719955	0.491988	0.546501	-0.177195	0.966053	0.980968	-0.352553	0.828259	0.935494	0.967672	-0.810773	0.977081	0.390696	0.337779	-0.394646	-0.937926	-0.374643	0.891172	-0.756898	0.766601	0.927003	0.384632	-0.0586425	0.0820322	-0.644435	0.136661	-0.0146098	0.481024	-0.156372	-0.453699
CG31760	0.1165	0.457	0.2579	0.01	0.1788	1	-0.00706238	0.17521	0.740267	0.845018	0.738133	0.0113433	0.886897	-0.0666701	0.656874	0.684816	0.661193	0.368016	0.475292	0.65211	-0.214154	0.804853	-0.874851	0.290513	0.228201	0.122614	-0.177349	0.0155883	0.191472	0.109496	0.181303	0.277704	0.979764	0.698752	-0.105681	0.708775	0.164894	0.231916	0.627893	0.284354	0.183834	0.842422	-0.404749	0.189217	0.753854	0.843432	0.606857	-0.0856392	0.596385
CG5805	0.0067	0.1537	0.0179	0.0883	0.1081	0.4938	1	-0.523472	-0.631021	0.00560818	-0.0292024	0.493122	0.40071	-0.727989	0.464785	0.329839	0.521336	-0.219068	-0.37654	-0.437421	-0.298393	-0.00270147	0.0816478	-0.643785	-0.591928	0.694012	-0.631674	-0.437121	-0.530969	0.774407	-0.561108	0.114191	-0.0600983	0.416652	0.653971	0.404608	-0.514572	0.400557	-0.195262	-0.402635	-0.12316	0.306332	-0.194782	0.718533	0.0304531	0.251141	-0.313507	-0.193817	0.649622
ND-42	0.0629	0.1186	0.0816	0.063	0.0235	0.2929	0.1141	1	0.492603	0.490682	0.0375813	-0.881941	-0.0450512	0.712339	-0.447142	0.0515001	-0.528216	0.797543	0.833972	0.648743	0.656102	0.492556	-0.0543946	0.930444	0.98071	-0.232245	0.819451	0.972702	0.999711	-0.867884	0.99688	0.296174	0.220083	-0.441065	-0.966259	-0.436047	0.911256	-0.799594	0.774637	0.977709	0.332209	-0.176254	0.0901786	-0.63762	-0.00631673	-0.129396	0.503881	-0.219082	-0.504804
pAbp	0.3645	0.2767	0.281	0.0003	0.0093	0.0165	0.0486	0.0948	1	0.615118	0.46593	-0.349208	0.378258	0.380363	0.111854	0.403805	0.115789	0.366305	0.605176	0.801596	0.00407794	0.696468	-0.699625	0.675407	0.582009	-0.409283	0.263134	0.319328	0.507043	-0.46409	0.527846	0.265339	0.79187	0.194478	-0.530758	0.291838	0.441158	-0.154802	0.625271	0.492593	0.299023	0.393627	-0.22078	-0.355353	0.650282	0.44199	0.655106	0.209688	-0.0157938
mlt	0.2713	0.3436	0.4953	0.0125	0.0674	0.0027	0.4743	0.0948	0.0524	1	0.775417	-0.385326	0.815036	0.146115	0.456338	0.541631	0.399043	0.547035	0.769814	0.598747	0.282616	0.855256	-0.761636	0.499675	0.482106	0.181647	0.0342415	0.356201	0.49883	-0.159307	0.469767	0.123614	0.867099	0.550345	-0.354972	0.480048	0.460773	0.0257482	0.886359	0.621046	0.0635181	0.708702	-0.137754	0.17497	0.588693	0.762043	0.842317	-0.402933	0.48683
vri	0.1596	0.4418	0.2295	0.0291	0.4255	0.0174	0.4858	0.4382	0.1227	0.0125	1	-0.0539042	0.744876	-0.0268304	0.647231	0.28056	0.595008	0.102523	0.429719	0.202615	0.185237	0.480098	-0.772406	0.0786458	0.0275004	0.184635	-0.305225	-0.135414	0.0482921	0.116135	0.0136416	-0.416416	0.744992	0.797476	0.0388723	0.589142	0.0586084	0.507172	0.472206	0.16863	-0.39094	0.746802	-0.0169726	0.490729	0.517686	0.827294	0.788419	-0.50946	0.670913
Fur1	0.0385	0.1447	0.0254	0.1555	0.0492	0.4884	0.136	0.0186	0.2038	0.1768	0.4507	1	0.204552	-0.72943	0.626203	-0.0118855	0.670471	-0.481118	-0.650902	-0.31391	-0.803425	-0.336684	0.00171179	-0.841903	-0.849744	0.412524	-0.757736	-0.867254	-0.876046	0.877465	-0.880654	0.0214842	-0.0936764	0.47458	0.86596	0.546492	-0.774649	0.664367	-0.615378	-0.843987	0.031063	0.257363	-0.407463	0.441382	-0.0450885	0.121406	-0.564544	0.35854	0.502885
alpha-Spec	0.0398	0.4236	0.0575	0.0754	0.3852	0.001	0.1604	0.5438	0.1784	0.0031	0.0169	0.3295	1	-0.316796	0.853674	0.62241	0.828029	0.270778	0.361482	0.403288	-0.224902	0.696671	-0.794073	-0.00643518	-0.0332095	0.446089	-0.43612	-0.158034	-0.0337448	0.419107	-0.0653734	0.181607	0.846151	0.867694	0.192678	0.8386	-0.00616039	0.439529	0.546713	0.115863	0.0885017	0.92669	-0.363293	0.495881	0.609465	0.899717	0.502469	-0.221107	0.853728
Vha55	0.1134	0.0005	0.0254	0.2555	0.1069	0.4405	0.0052	0.1044	0.1804	0.3907	0.47	0.0574	0.2031	1	-0.510792	-0.403021	-0.704173	0.525413	0.470352	0.453405	0.446995	-0.0447183	-0.103075	0.820154	0.78574	-0.702826	0.893481	0.73781	0.717644	-0.737034	0.737852	-0.0767976	-0.0369798	-0.476642	-0.692594	-0.558536	0.860606	-0.472008	0.424923	0.583925	0.241338	-0.17354	0.621278	-0.728032	-0.268062	-0.151483	0.31191	-0.0913599	-0.584283
yps	0.0077	0.286	0.0003	0.2889	0.2078	0.0354	0.1145	0.1749	0.3984	0.1266	0.0427	0.045	0.0037	0.0807	1	0.292294	0.94726	-0.00462457	0.0328229	0.143377	-0.459236	0.293696	-0.631111	-0.408737	-0.427111	0.547056	-0.683471	-0.537007	-0.434862	0.715886	-0.469838	-0.0185422	0.569719	0.935073	0.564991	0.89382	-0.319839	0.721201	0.14402	-0.30392	0.0201776	0.842155	-0.375311	0.590136	0.334763	0.754434	0.19043	-0.0762383	0.901376
Rgk1	0.1985	0.2165	0.2848	0.1405	0.3522	0.0281	0.2058	0.4315	0.1589	0.0881	0.2419	0.4982	0.0473	0.1628	0.2473	1	0.490897	0.0770414	0.115317	0.279266	-0.247911	0.769199	-0.437441	0.0880727	0.0481153	0.199761	-0.276558	-0.0374127	0.0551044	0.158263	0.0609623	0.500711	0.710996	0.386625	-0.043028	0.490861	-0.160048	0.00792747	0.331471	0.155886	0.0510727	0.487084	-0.541263	0.333856	0.848086	0.544234	0.26831	-0.0240964	0.449974
CHES-1-like	0.0072	0.1119	0.0004	0.279	0.122	0.0364	0.0942	0.1042	0.386	0.1655	0.0631	0.0327	0.0045	0.0257	0.0002	0.1142	1	-0.158416	-0.083638	0.043441	-0.511996	0.359797	-0.555961	-0.506822	-0.527893	0.591424	-0.805249	-0.637423	-0.518283	0.740814	-0.547185	0.0417886	0.593444	0.918059	0.592578	0.914538	-0.515092	0.697717	0.0323861	-0.372287	-0.0835584	0.770262	-0.551281	0.689342	0.502161	0.717686	0.139592	-0.036485	0.904043
Wbp2	0.3981	0.0566	0.1156	0.2172	0.0395	0.1752	0.3028	0.0448	0.1879	0.0719	0.408	0.1365	0.2411	0.0928	0.502	0.4404	0.3559	1	0.739185	0.764376	0.290599	0.453048	-0.162224	0.713706	0.799842	0.0968531	0.659558	0.80377	0.805283	-0.443453	0.785869	0.481466	0.296784	-0.164697	-0.690082	-0.178734	0.839814	-0.597725	0.746319	0.809658	0.573637	0.129682	-0.118839	-0.536798	-0.143023	0.0467933	0.270354	-0.233111	-0.194523
CG6115	0.2426	0.2181	0.1049	0.0245	0.0201	0.1109	0.1721	0.0006	0.0534	0.0098	0.1417	0.0439	0.1925	0.0999	0.4706	0.3841	0.4176	0.0205	1	0.723349	0.590455	0.703383	-0.39616	0.767996	0.807589	0.0447119	0.435171	0.7288	0.83665	-0.627999	0.811127	0.186408	0.520031	0.0443754	-0.739046	0.0530429	0.784738	-0.435438	0.938565	0.89954	0.295028	0.203553	-0.0714276	-0.334511	0.190074	0.237325	0.77084	-0.221277	-0.075021
CG17691	0.4401	0.105	0.1843	0.0285	0.018	0.0353	0.1388	0.0578	0.0079	0.059	0.3121	0.2283	0.1675	0.1283	0.369	0.2412	0.4518	0.013	0.0211	1	-0.0540977	0.668721	-0.539766	0.755309	0.736952	-0.193329	0.460394	0.567195	0.662844	-0.415027	0.671789	0.614892	0.633475	0.0428145	-0.594628	0.197647	0.696019	-0.39067	0.765616	0.644615	0.741923	0.354214	-0.279898	-0.584119	0.299266	0.281738	0.411852	0.26607	-0.0946786
Alas	0.0331	0.3883	0.0866	0.358	0.2063	0.304	0.1966	0.0941	0.4998	0.2552	0.3301	0.0186	0.3248	0.1716	0.11	0.2755	0.0987	0.2289	0.0783	0.4526	1	0.1273	0.209864	0.461291	0.536129	0.00218834	0.448797	0.630004	0.644169	-0.696027	0.614758	-0.394219	-0.125123	-0.325202	-0.632437	-0.502421	0.519194	-0.454017	0.431133	0.683234	-0.376068	-0.358566	0.361457	-0.115233	-0.194247	-0.213507	0.54612	-0.613918	-0.347507
blow	0.451	0.4205	0.4983	0.0174	0.0155	0.0066	0.5142	0.0451	0.0277	0.0052	0.1151	0.2066	0.0154	0.4356	0.242	0.0138	0.1889	0.1213	0.0253	0.0327	0.3933	1	-0.610719	0.499827	0.484184	0.170914	-0.0100848	0.350838	0.497131	-0.236104	0.486703	0.479193	0.859294	0.364849	-0.426526	0.482857	0.325633	-0.193774	0.812673	0.611928	0.261152	0.512964	-0.464836	0.0448475	0.759572	0.566353	0.682964	-0.0439206	0.316879
mtTFB1	0.1195	0.3012	0.2268	0.0058	0.2488	0.002	0.4273	0.319	0.0184	0.0077	0.0099	0.4567	0.0226	0.3749	0.0568	0.1336	0.0722	0.3219	0.1703	0.0831	0.3488	0.0368	1	-0.279372	-0.15267	0.155632	0.195485	0.087787	-0.0702157	-0.138033	-0.0697376	-0.0129476	-0.894761	-0.747601	-0.0467099	-0.734269	-0.18229	-0.465474	-0.569881	-0.125078	-0.108404	-0.906031	0.00331018	-0.214178	-0.694984	-0.924135	-0.679681	-0.0028719	-0.623282
Rtnl1	0.093	0.0447	0.0988	0.005	0.0067	0.194	0.0337	0.05	0.0021	0.091	0.3972	0.0422	0.5762	0.03	0.1891	0.4039	0.1053	0.0797	0.0223	0.0152	0.1851	0.0517	0.1988	1	0.979354	-0.509946	0.82578	0.890334	0.93522	-0.836178	0.951684	0.309501	0.349863	-0.363585	-0.902252	-0.322751	0.918931	-0.662602	0.769434	0.872037	0.416421	-0.0200437	0.204514	-0.697589	0.14439	0.02461	0.542645	-0.0276975	-0.465824
Chchd3	0.0838	0.0731	0.1056	0.0185	0.0112	0.2212	0.0419	0.0096	0.0081	0.104	0.4534	0.0478	0.5493	0.0647	0.2151	0.4064	0.1103	0.0387	0.0011	0.0093	0.1732	0.0408	0.2519	0.0018	1	-0.367026	0.854219	0.954204	0.983611	-0.853639	0.990623	0.342934	0.270046	-0.425235	-0.946894	-0.394448	0.943367	-0.758673	0.776215	0.935016	0.431257	-0.10707	0.133285	-0.713915	0.0296668	-0.0768782	0.488729	-0.100734	-0.508827
CG7766	0.1977	0.0668	0.0684	0.2795	0.1519	0.3805	0.0111	0.3439	0.1521	0.3333	0.3335	0.1295	0.1431	0.0171	0.084	0.3326	0.0646	0.3629	0.4369	0.3169	0.4681	0.3546	0.3943	0.0176	0.1343	1	-0.53876	-0.240306	-0.237414	0.487707	-0.29625	0.0903117	0.0371498	0.404615	0.315358	0.363323	-0.341056	0.160038	0.0162225	-0.0613046	-0.106399	0.168797	-0.57785	0.546101	-0.0791493	0.104014	-0.100317	-0.343238	0.50945
CG42518	0.0374	0.0109	0.0055	0.4567	0.1216	0.3105	0.0422	0.1249	0.2993	0.5053	0.2209	0.0782	0.1017	0.003	0.0155	0.2439	0.0024	0.0937	0.1409	0.1265	0.1854	0.4342	0.3434	0.0997	0.12	0.0282	1	0.883134	0.821045	-0.802742	0.841415	0.211881	-0.171732	-0.727273	-0.831358	-0.750665	0.854764	-0.79032	0.374653	0.690148	0.368021	-0.414037	0.371447	-0.847242	-0.354931	-0.414448	0.0818818	-0.0778468	-0.769871
Pglym78	0.0576	0.0847	0.0472	0.2916	0.0866	0.5031	0.2125	0.014	0.2682	0.2022	0.3485	0.0309	0.4185	0.0905	0.0867	0.5029	0.0441	0.0331	0.0294	0.102	0.1099	0.2074	0.498	0.1091	0.0693	0.3355	0.0787	1	0.970346	-0.827429	0.969835	0.332103	0.0466772	-0.563492	-0.923883	-0.557554	0.920796	-0.850108	0.686143	0.928016	0.384486	-0.272454	0.182673	-0.682627	-0.168689	-0.249858	0.33581	-0.207452	-0.578173
ND-B22	0.0653	0.1146	0.0854	0.052	0.0202	0.2747	0.1086	0.0001	0.0768	0.0902	0.4244	0.0234	0.5482	0.1006	0.1842	0.4173	0.1054	0.0341	0.0001	0.0482	0.1022	0.0423	0.2982	0.0423	0.0059	0.3335	0.1261	0.0172	1	-0.863979	0.997439	0.299676	0.233896	-0.430748	-0.96584	-0.426589	0.915381	-0.79298	0.779305	0.976946	0.339862	-0.161577	0.0863506	-0.641833	-0.000128486	-0.116997	0.507378	-0.216142	-0.498303
Patronin	0	0.1911	0.0048	0.1274	0.0854	0.394	0.0058	0.0314	0.117	0.3756	0.3952	0.0115	0.127	0.0421	0.0156	0.3594	0.0138	0.1445	0.0561	0.1565	0.051	0.3079	0.3954	0.0534	0.0476	0.0774	0.0589	0.0688	0.0343	1	-0.879375	-0.0660608	0.0133906	0.641695	0.937512	0.615466	-0.731638	0.783347	-0.472173	-0.789988	-0.131437	0.484464	-0.203387	0.707728	0.0559873	0.383522	-0.418322	0.0471583	0.756156
ATPsynCF6	0.0561	0.1165	0.0803	0.0405	0.017	0.2804	0.0717	0	0.0488	0.115	0.469	0.019	0.5151	0.0977	0.1666	0.4022	0.1031	0.0485	0.0002	0.042	0.1281	0.0394	0.2847	0.0277	0.0042	0.2527	0.1267	0.0284	0.0003	0.0221	1	0.319886	0.228156	-0.461	-0.972369	-0.442569	0.914041	-0.805023	0.759524	0.962467	0.359929	-0.17791	0.0983797	-0.675576	0.0144284	-0.132212	0.487446	-0.168548	-0.530979
CG4615	0.4881	0.4137	0.3412	0.4225	0.1613	0.2557	0.3921	0.2087	0.2684	0.3889	0.1613	0.4694	0.3348	0.4216	0.4862	0.1041	0.4689	0.1032	0.34	0.0515	0.1772	0.1137	0.4907	0.2025	0.1955	0.4174	0.2808	0.1985	0.2075	0.4274	0.2046	1	0.238408	-0.20557	-0.275812	0.100429	0.227007	-0.507466	0.302787	0.289409	0.833043	0.0384042	-0.575639	-0.429898	0.198723	-0.0811834	-0.24593	0.507076	-0.143973
Sema5c	0.167	0.5029	0.2795	0.0071	0.153	0.0002	0.4666	0.2767	0.0087	0.0021	0.0168	0.4313	0.0024	0.465	0.071	0.0241	0.0552	0.2396	0.0876	0.0397	0.3659	0.0029	0.0004	0.1721	0.1995	0.4916	0.2972	0.4863	0.2589	0.4635	0.2556	0.2856	1	0.668117	-0.159048	0.69722	0.178197	0.209429	0.669347	0.327623	0.129339	0.806807	-0.346252	0.194002	0.839646	0.846045	0.707628	-0.0592486	0.558752
CG6424	0.0156	0.2375	0.0018	0.1763	0.1725	0.0262	0.147	0.1347	0.3225	0.0749	0.0086	0.1087	0.004	0.0995	0.0011	0.1732	0.0002	0.3612	0.4511	0.4597	0.2028	0.1805	0.024	0.1993	0.1456	0.1719	0.0054	0.0491	0.1429	0.03	0.1212	0.3237	0.0331	1	0.547442	0.915625	-0.354299	0.810024	0.180505	-0.290842	-0.219345	0.893898	-0.220888	0.729028	0.535517	0.887367	0.40267	-0.181024	0.957988
zfh1	0.0059	0.1674	0.0206	0.0635	0.0408	0.3794	0.0252	0.0077	0.0656	0.2026	0.4641	0.0303	0.3719	0.1014	0.0659	0.4377	0.0635	0.0943	0.0243	0.0734	0.0936	0.1147	0.5283	0.0664	0.0354	0.2064	0.1032	0.065	0.0101	0.004	0.0066	0.2249	0.3374	0.0571	1	0.525879	-0.819192	0.852982	-0.635161	-0.92114	-0.268961	0.323478	-0.0215868	0.698831	-0.011987	0.257486	-0.433545	0.145171	0.637303
MICU3	0.0146	0.1822	0.0003	0.1687	0.1632	0.0239	0.1553	0.1127	0.2363	0.1106	0.0636	0.0646	0.0068	0.0658	0.0005	0.1081	0	0.3552	0.4511	0.3162	0.098	0.1118	0.0231	0.2228	0.1368	0.1793	0.0022	0.0435	0.1174	0.0331	0.112	0.4115	0.0226	0.0008	0.0551	1	-0.377408	0.69676	0.199524	-0.298979	0.0670407	0.840727	-0.413912	0.577633	0.632711	0.802937	0.304392	0.182922	0.871421
Gdh	0.133	0.0073	0.0941	0.1583	0.0685	0.3162	0.1233	0.0451	0.1299	0.1105	0.435	0.0728	0.5609	0.0167	0.2316	0.348	0.0986	0.0191	0.0122	0.0334	0.165	0.226	0.2444	0.0278	0.016	0.1823	0.0576	0.0336	0.0426	0.0908	0.0517	0.2618	0.3175	0.2024	0.1055	0.1772	1	-0.623436	0.764773	0.860314	0.458878	-0.0223089	0.320215	-0.686763	-0.168815	-0.0328593	0.445338	-0.16071	-0.426974
Vps13	0.0165	0.2471	0.0193	0.5022	0.1059	0.2928	0.195	0.0736	0.377	0.4547	0.0998	0.0805	0.1187	0.1283	0.0164	0.4931	0.0236	0.0775	0.1367	0.1745	0.1626	0.35	0.0988	0.1194	0.1132	0.3726	0.056	0.0322	0.0748	0.034	0.0768	0.0966	0.2935	0.0039	0.0262	0.0157	0.1175	1	-0.330769	-0.729927	-0.413877	0.621035	0.11381	0.748119	0.241443	0.614917	0.0467622	-0.0369594	0.793408
CG16721	0.4781	0.1693	0.1566	0.0259	0.0034	0.0418	0.3272	0.0065	0.0461	0.003	0.1167	0.054	0.0853	0.1403	0.3629	0.1977	0.4639	0.0191	0.0027	0.0138	0.1493	0.0056	0.0731	0.0103	0.0015	0.4713	0.1773	0.0378	0.0057	0.1175	0.0082	0.2303	0.0289	0.3462	0.0688	0.3084	0.0128	0.2179	1	0.849993	0.353529	0.427873	-0.0355256	-0.222448	0.357052	0.454766	0.776866	-0.217814	0.111624
ND-B14.5A	0.0833	0.1829	0.0909	0.0519	0.0132	0.2181	0.2138	0	0.0957	0.0316	0.3404	0.0267	0.3332	0.106	0.2338	0.3543	0.1847	0.0251	0.0005	0.0448	0.0625	0.0171	0.3077	0.0506	0.0094	0.5192	0.1267	0.0151	0.0001	0.0534	0.0004	0.225	0.2011	0.251	0.0169	0.2483	0.0442	0.0717	0.0025	1	0.2771	-0.0645245	-0.0101624	-0.487181	0.0820886	-0.0108943	0.595279	-0.309764	-0.345904
Psa	0.4395	0.1299	0.3498	0.4281	0.1417	0.3317	0.3746	0.2254	0.2356	0.4286	0.1664	0.4289	0.437	0.2864	0.4945	0.4374	0.4207	0.0563	0.2364	0.0181	0.1671	0.2617	0.4202	0.1192	0.0881	0.4005	0.1816	0.1549	0.2194	0.4133	0.1961	0.0038	0.3736	0.29	0.3042	0.4511	0.087	0.1564	0.1907	0.2834	1	0.0655771	-0.279319	-0.659203	-0.0919226	-0.109814	-0.210038	0.62824	-0.237895
Atf3	0.047	0.387	0.0269	0.0805	0.5497	0.0017	0.2419	0.3651	0.1781	0.0092	0.0044	0.2709	0.0003	0.2829	0.0026	0.1085	0.0022	0.3129	0.2976	0.1963	0.1506	0.0599	0.0033	0.6102	0.4729	0.293	0.0783	0.2162	0.3889	0.0651	0.3778	0.458	0.0016	0.0011	0.1491	0.0008	0.5986	0.0373	0.1442	0.5367	0.5198	1	-0.10063	0.467813	0.586148	0.970037	0.464184	-0.12498	0.858411
alpha-Est3	0.3261	0.0393	0.1672	0.3014	0.5942	0.1467	0.3874	0.5343	0.3366	0.4113	0.4781	0.0998	0.1721	0.0747	0.169	0.0694	0.0803	0.3167	0.4316	0.2483	0.1484	0.0919	0.4107	0.367	0.5093	0.1273	0.1108	0.3749	0.5433	0.3149	0.5507	0.083	0.1864	0.2708	0.6565	0.1983	0.18	0.2969	0.4775	0.3771	0.2951	0.2567	1	-0.0886521	-0.351198	-0.0341002	0.128796	-0.255828	-0.19966
Adk3	0.0249	0.0523	0.0273	0.4257	0.1175	0.3265	0.0321	0.1169	0.1959	0.3304	0.1092	0.1561	0.0918	0.0334	0.0585	0.2192	0.0279	0.1012	0.2176	0.0626	0.3623	0.4277	0.3155	0.0756	0.0923	0.0682	0.0088	0.097	0.1152	0.0443	0.1151	0.1389	0.3214	0.0171	0.0754	0.0603	0.0666	0.0305	0.2962	0.1313	0.0281	0.0872	0.4541	1	0.345682	0.536729	0.122284	-0.412111	0.830505
Nep2	0.2488	0.2239	0.194	0.0468	0.4633	0.0179	0.443	0.4473	0.0446	0.0679	0.0921	0.5091	0.032	0.2389	0.2139	0.0064	0.0962	0.3265	0.3388	0.2448	0.2948	0.0203	0.0096	0.4265	0.5126	0.3688	0.1632	0.2523	0.4617	0.39	0.5197	0.3062	0.0081	0.0803	0.5688	0.0294	0.2862	0.2491	0.1941	0.4671	0.4482	0.0094	0.1916	0.203	1	0.696613	0.551597	0.0973492	0.480953
CG33056	0.0595	0.4508	0.0474	0.0431	0.5824	0.0071	0.3011	0.392	0.1315	0.0055	0.0009	0.424	0.002	0.3342	0.0214	0.0704	0.0145	0.4285	0.2845	0.2592	0.3251	0.0457	0.0028	0.3756	0.4919	0.3398	0.1011	0.2163	0.4078	0.1372	0.3831	0.4093	0.0045	0.0016	0.2295	0.0041	0.5344	0.0315	0.1237	0.5696	0.3615	0.0004	0.3713	0.0602	0.0093	1	0.604252	-0.223011	0.845161
atilla	0.4147	0.416	0.3786	0.0096	0.0415	0.0534	0.2314	0.0353	0.042	0.0055	0.0119	0.0506	0.0952	0.2404	0.3393	0.2489	0.3625	0.2718	0.0118	0.1555	0.0761	0.0363	0.0171	0.0237	0.0265	0.3722	0.4603	0.2557	0.0323	0.1547	0.0344	0.2813	0.0312	0.1628	0.1147	0.2187	0.1166	0.4379	0.0145	0.0267	0.3226	0.0979	0.3734	0.37	0.0813	0.031	1	-0.372446	0.264703
CG42354	0.378	0.4476	0.3554	0.4811	0.2498	0.4211	0.3247	0.1955	0.3191	0.166	0.0922	0.1883	0.2937	0.4024	0.4355	0.4914	0.4762	0.2855	0.3021	0.2726	0.0778	0.4658	0.5208	0.4616	0.3321	0.2027	0.3771	0.1886	0.1953	0.4396	0.2276	0.0909	0.4475	0.3399	0.2889	0.342	0.2903	0.4741	0.3142	0.1838	0.0477	0.3328	0.2328	0.1406	0.3822	0.2608	0.1711	1	-0.241831
rudhira	0.0042	0.2106	0.0019	0.3571	0.1229	0.0591	0.0351	0.1034	0.4773	0.1018	0.0346	0.0913	0.0067	0.0512	0.0021	0.1285	0.0005	0.336	0.4393	0.4221	0.1939	0.2133	0.0667	0.1101	0.1159	0.1202	0.0039	0.0708	0.1057	0.0119	0.1042	0.3753	0.0669	0.0006	0.0378	0.0026	0.1262	0.0087	0.3877	0.1868	0.2741	0.0045	0.2816	0.0037	0.0987	0.0103	0.2554	0.2865	1
mfas	0.2874	0.4761	0.1651	0.0129	0.0023	0.0455	0.3035	0.0002	0.032	0.0028	0.061	0.0114	0.101	0.2605	0.4995	0.0755	0.4497	0.1389	0.0047	0.1022	0.0566	0.0037	0.0629	0.0057	0.0045	0.4104	0.3086	0.0614	0.0008	0.0542	0	0.4132	0.0293	0.3321	0.0237	0.351	0.0708	0.2482	0.0019	0.0004	0.4551	0.1768	0.4556	0.4529	0.0701	0.0852	0.0008	0.1894	0.3986
Pex19	0.4307	0.1977	0.1455	0.063	0.0083	0.0663	0.3731	0.0116	0.0671	0.0104	0.2645	0.1023	0.1219	0.2079	0.4107	0.1795	0.5	0.0086	0.0031	0.0077	0.2068	0.0051	0.1684	0.029	0.0049	0.3778	0.1637	0.0307	0.0076	0.1321	0.0097	0.0776	0.0623	0.4665	0.0657	0.3633	0.0256	0.1075	0.0013	0.0039	0.0701	0.214	0.2731	0.2072	0.267	0.2449	0.0642	0.4256	0.4891
CG33155	0.0028	0.1425	0.021	0.2422	0.1096	0.4041	0.0112	0.0763	0.1116	0.4646	0.2023	0.1119	0.1311	0.0564	0.0631	0.2691	0.043	0.1025	0.0886	0.046	0.2192	0.3897	0.3478	0.061	0.0584	0.1226	0.0366	0.0853	0.074	0.0121	0.0715	0.1737	0.413	0.0306	0.024	0.09	0.0721	0.0211	0.1931	0.0917	0.0594	0.0774	0.4022	0.0012	0.27	0.0764	0.4282	0.1807	0.0064
CG6175	0.0661	0.1527	0.0794	0.2169	0.0613	0.3987	0.2597	0.0028	0.2403	0.1211	0.4501	0.0577	0.553	0.1053	0.1954	0.4789	0.1255	0.019	0.0049	0.0519	0.0836	0.0943	0.5131	0.0816	0.023	0.5599	0.1116	0.0019	0.0045	0.0634	0.0083	0.1699	0.3748	0.1484	0.0431	0.1876	0.0239	0.0371	0.0112	0.0036	0.1071	0.3386	0.5821	0.0945	0.3056	0.3406	0.1603	0.3159	0.1232
AGO1	0.0307	0.0593	0.0147	0.5285	0.1172	0.2497	0.1973	0.0536	0.4245	0.4249	0.2094	0.0284	0.1487	0.0499	0.0232	0.2688	0.0054	0.0857	0.0765	0.1889	0.0761	0.4442	0.2626	0.1051	0.0969	0.219	0.0246	0.0037	0.0668	0.041	0.0717	0.2671	0.2659	0.0109	0.0832	0.0117	0.0356	0.0214	0.0989	0.0666	0.1967	0.0624	0.1327	0.0547	0.1689	0.096	0.3857	0.3433	0.0187
Aldh-III	0.3372	0.0429	0.3185	0.113	0.1357	0.0993	0.214	0.2513	0.0387	0.1711	0.3626	0.2567	0.2658	0.0811	0.4876	0.2204	0.4331	0.2472	0.2875	0.045	0.2619	0.1874	0.037	0.0612	0.1615	0.0298	0.1952	0.2641	0.2418	0.3304	0.2228	0.2135	0.0828	0.4208	0.2777	0.3372	0.1437	0.4709	0.1318	0.2919	0.1333	0.131	0.2618	0.196	0.1315	0.1223	0.2291	0.256	0.4809
CG9775	0.0347	0.1004	0.0431	0.0178	0.0235	0.2776	0.0047	0.0538	0.0091	0.1646	0.4227	0.0171	0.3988	0.0324	0.0865	0.4094	0.0633	0.1221	0.0509	0.0548	0.146	0.1237	0.2482	0.0024	0.0236	0.0119	0.0859	0.1138	0.0518	0.0089	0.0373	0.3316	0.2208	0.1383	0.0204	0.1528	0.0828	0.0986	0.0521	0.0643	0.3469	0.411	0.2908	0.0732	0.3263	0.4983	0.0505	0.4369	0.065
Fs	0.0289	0.2387	0.1748	0.4038	0.4233	0.2218	0.0805	0.4266	0.3583	0.1471	0.2484	0.267	0.0548	0.4506	0.0355	0.4737	0.1337	0.1928	0.2909	0.2766	0.33	0.3414	0.1568	0.4245	0.4606	0.156	0.3327	0.4789	0.4305	0.1062	0.4149	0.3704	0.2884	0.0914	0.2508	0.1078	0.3183	0.1909	0.1714	0.4782	0.1801	0.0502	0.4382	0.2783	0.3845	0.1103	0.4145	0.4025	0.0628
CG10561	0.1541	0.4272	0.184	0.1251	0.1118	0.3601	0.2296	0.008	0.1641	0.1156	0.3268	0.0866	0.3852	0.2481	0.4169	0.4389	0.3316	0.1619	0.0039	0.116	0.0725	0.0894	0.3442	0.0545	0.009	0.4596	0.3174	0.0453	0.0088	0.0622	0.0077	0.3914	0.2739	0.4409	0.0559	0.4322	0.0495	0.1929	0.021	0.0153	0.2475	0.496	0.4757	0.2586	0.4313	0.4868	0.0484	0.4407	0.3565
28SrRNA-Psi:CR45862	0.0192	0.1823	0.0104	0.4501	0.1548	0.1781	0.0531	0.0645	0.4713	0.2724	0.192	0.216	0.0897	0.075	0.1179	0.0513	0.0574	0.0937	0.1973	0.2503	0.1555	0.2773	0.1124	0.1643	0.0908	0.4135	0.0156	0.0444	0.0625	0.0325	0.0757	0.4344	0.1444	0.0382	0.0322	0.0477	0.0652	0.0251	0.4185	0.1197	0.2059	0.0516	0.4507	0.012	0.0243	0.027	0.3672	0.4604	0.0144
CG18135	0.2992	0.2831	0.1231	0.0173	0	0.0321	0.229	0.0317	0.0082	0.0124	0.1693	0.0446	0.1593	0.1828	0.4093	0.0366	0.4628	0.0717	0.0327	0.0315	0.2115	0.0025	0.0999	0.0036	0.0134	0.2596	0.1406	0.0926	0.0259	0.0704	0.0156	0.1915	0.021	0.4925	0.0383	0.4531	0.0829	0.1338	0.0078	0.017	0.3458	0.1791	0.3196	0.2998	0.0586	0.1515	0.0269	0.338	0.4649
Unc-76	0.2364	0.3327	0.4128	0.0046	0.2903	0.013	0.3642	0.3289	0.0349	0.0055	0.0036	0.3018	0.0271	0.3305	0.1096	0.2258	0.1534	0.3409	0.0681	0.1263	0.3479	0.0415	0	0.2054	0.28	0.3752	0.4389	0.4543	0.3133	0.426	0.3292	0.3348	0.0039	0.0344	0.4099	0.0571	0.2567	0.1931	0.0307	0.2505	0.4421	0.0059	0.4106	0.2928	0.0389	0.0013	0.0027	0.3486	0.0894
CG31211	0.0072	0.0737	0.0012	0.3634	0.1221	0.1319	0.0674	0.1121	0.4407	0.2767	0.0672	0.0654	0.0146	0.028	0.0014	0.2023	0	0.1415	0.2616	0.2667	0.1572	0.3354	0.0968	0.112	0.1219	0.0686	0.0022	0.0538	0.1162	0.0227	0.1143	0.2883	0.1519	0	0.0665	0.0004	0.0873	0.0076	0.3522	0.1202	0.1997	0.004	0.2026	0.0069	0.1435	0.0159	0.3606	0.4185	0.0001
CG42674	0.1535	0.0694	0.036	0.4596	0.0928	0.423	0.2895	0.0728	0.486	0.3304	0.3512	0.0764	0.3472	0.0742	0.0909	0.4477	0.0466	0.0278	0.0979	0.2292	0.1203	0.4187	0.2456	0.1234	0.1188	0.4868	0.0346	0.0107	0.0741	0.1006	0.0823	0.2761	0.3743	0.0578	0.0728	0.021	0.0603	0.0222	0.1098	0.0612	0.2953	0.1625	0.2774	0.0962	0.1532	0.2125	0.4609	0.135	0.0826
rhea	0.0053	0.2184	0.0096	0.4018	0.1173	0.2519	0.0298	0.085	0.261	0.3779	0.0884	0.0802	0.0588	0.0689	0.011	0.3578	0.0083	0.126	0.1421	0.1483	0.18	0.4338	0.1445	0.097	0.0958	0.1657	0.0354	0.0633	0.0872	0.0097	0.0781	0.1736	0.2714	0.0042	0.0269	0.0143	0.1089	0.0044	0.2781	0.0921	0.1374	0.0376	0.4204	0.0058	0.2497	0.0238	0.4652	0.2987	0.0026
CG31678	0.418	0.2791	0.1945	0.4891	0.048	0.384	0.4516	0.238	0.3418	0.4938	0.1239	0.326	0.4396	0.4223	0.2152	0.0924	0.2863	0.1523	0.4588	0.1692	0.2599	0.2436	0.3683	0.1897	0.1882	0.3276	0.1346	0.1384	0.2342	0.3676	0.2021	0.0082	0.408	0.156	0.1987	0.2514	0.3005	0.0514	0.3776	0.2625	0.1005	0.3621	0.2691	0.1464	0.3218	0.3384	0.2286	0.3107	0.2258
CG31324	0.4299	0.3174	0.5013	0.0589	0.1404	0.0546	0.4297	0.1344	0.1942	0.0034	0.0093	0.1472	0.0493	0.4433	0.2324	0.1322	0.1957	0.2472	0.043	0.3593	0.0733	0.038	0.1213	0.248	0.1637	0.1792	0.332	0.2532	0.1308	0.322	0.1357	0.3005	0.049	0.1096	0.1874	0.2435	0.291	0.4496	0.0436	0.0799	0.1528	0.1289	0.3307	0.1506	0.1158	0.0672	0.0038	0.0289	0.1351
CG10543	0.0746	0.0693	0.077	0.0574	0.0431	0.3072	0.0563	0.002	0.0774	0.105	0.4025	0.0163	0.51	0.0538	0.1793	0.498	0.0861	0.0513	0.0001	0.0543	0.0996	0.1129	0.2794	0.024	0.0034	0.2047	0.1036	0.0281	0.0031	0.0304	0.002	0.2542	0.287	0.1366	0.03	0.1006	0.0078	0.0993	0.0051	0.0046	0.2317	0.4136	0.3578	0.1106	0.4062	0.4373	0.0201	0.1856	0.101
Gli	0.3372	0.0524	0.1445	0.4563	0.2172	0.4394	0.1015	0.3142	0.3008	0.2327	0.1992	0.3981	0.1842	0.0698	0.1844	0.3952	0.1528	0.2644	0.2989	0.2433	0.2352	0.236	0.4076	0.2045	0.2391	0.0636	0.0379	0.2572	0.3085	0.2983	0.2669	0.2866	0.3715	0.1146	0.2451	0.1075	0.2465	0.2198	0.3274	0.484	0.2099	0.3022	0.3361	0.0376	0.3061	0.2689	0.1727	0.3355	0.0897
CG14661	0.3339	0.189	0.1275	0.0013	0.0012	0.0208	0.1013	0.0303	0.0005	0.0112	0.1446	0.0801	0.1558	0.1116	0.4756	0.1128	0.4971	0.0487	0.011	0.0025	0.2761	0.0037	0.0598	0.0012	0.0015	0.2374	0.1486	0.1062	0.0224	0.0712	0.0155	0.1708	0.011	0.4255	0.0387	0.3516	0.055	0.1807	0.0055	0.0212	0.1778	0.1767	0.3133	0.1682	0.0635	0.1588	0.0185	0.4924	0.4518
gzl	0.4475	0.1953	0.3548	0.1117	0.17	0.199	0.2925	0.1171	0.1136	0.0697	0.2247	0.1753	0.2142	0.163	0.3691	0.4721	0.4886	0.1996	0.0169	0.0714	0.2461	0.0987	0.0684	0.053	0.0864	0.3288	0.3599	0.1737	0.1167	0.2133	0.1252	0.4038	0.1396	0.3211	0.2445	0.2189	0.0416	0.4734	0.0111	0.0973	0.1683	0.1902	0.2954	0.3152	0.3079	0.1899	0.0418	0.3388	0.4203
CR41590	0.4966	0.1785	0.1589	0.0129	0.0001	0.0213	0.3203	0.0219	0.0194	0.0022	0.1438	0.0584	0.0983	0.1599	0.4534	0.0553	0.4816	0.0327	0.0122	0.0132	0.2275	0.0005	0.0765	0.0087	0.005	0.4026	0.1679	0.0725	0.0202	0.1296	0.0155	0.1478	0.0122	0.3892	0.0648	0.3552	0.0515	0.1758	0.0008	0.0107	0.2241	0.162	0.366	0.2946	0.0696	0.1238	0.0184	0.3222	0.4219
Ube4B	0.0475	0.1279	0.0581	0.4166	0.0922	0.4184	0.2294	0.0749	0.2717	0.4023	0.1489	0.1015	0.2888	0.1082	0.0665	0.4743	0.0414	0.054	0.0807	0.0563	0.2078	0.22	0.3311	0.1025	0.0898	0.3095	0.0748	0.0248	0.0766	0.0723	0.0791	0.0541	0.4287	0.0172	0.0751	0.0705	0.0849	0.0029	0.0931	0.072	0.0119	0.1256	0.347	0.0193	0.2771	0.1107	0.4802	0.3239	0.0281
ND-24	0.0269	0.1138	0.0502	0.1002	0.0568	0.3542	0.036	0.0015	0.0797	0.1603	0.4533	0.0507	0.4456	0.0875	0.1279	0.5499	0.0892	0.0371	0.0041	0.0452	0.1352	0.14	0.322	0.064	0.0138	0.2114	0.1048	0.031	0.0019	0.016	0.0019	0.215	0.3941	0.0822	0.0043	0.0794	0.0496	0.047	0.0245	0.0046	0.1249	0.288	0.5666	0.0788	0.4131	0.243	0.1234	0.2501	0.0667
COX6B	0.0762	0.1467	0.1009	0.0302	0.008	0.1907	0.1652	0.0003	0.051	0.0418	0.3679	0.0431	0.3558	0.1151	0.2244	0.3554	0.1612	0.0216	0.0007	0.0248	0.1166	0.0115	0.2761	0.0397	0.0055	0.4276	0.1273	0.0297	0.0002	0.0546	0.0002	0.1889	0.1878	0.2194	0.0147	0.2201	0.0505	0.0687	0.0034	0.0001	0.19	0.5179	0.323	0.1206	0.4767	0.5307	0.0283	0.2188	0.1379
CG30345	0.0552	0.4867	0.1769	0.0952	0.4137	0.0126	0.1791	0.4279	0.1956	0.0033	0.0245	0.4828	0.0005	0.3708	0.0182	0.1072	0.0385	0.2397	0.099	0.1531	0.5002	0.0193	0.0162	0.393	0.4425	0.1929	0.2178	0.467	0.4233	0.2629	0.4758	0.385	0.0107	0.0109	0.4137	0.0127	0.341	0.1807	0.0258	0.2603	0.3903	0.0019	0.3427	0.1302	0.0822	0.0047	0.0449	0.328	0.0161
snRNA:U2:34ABc	0.3513	0.0251	0.0908	0.293	0.0747	0.3792	0.2395	0.0266	0.3009	0.1052	0.3091	0.0762	0.3672	0.0301	0.4505	0.2147	0.2185	0.0121	0.0089	0.0836	0.0901	0.3135	0.32	0.0553	0.019	0.4631	0.0606	0.0164	0.0227	0.1083	0.0366	0.4808	0.3964	0.3831	0.0983	0.3052	0.0005	0.1766	0.0168	0.0236	0.1841	0.3926	0.1942	0.1396	0.21	0.4275	0.1304	0.2227	0.3388
PhKgamma	0.2433	0.1191	0.1052	0.208	0.0195	0.2437	0.2873	0.1033	0.1133	0.2004	0.297	0.0999	0.4193	0.116	0.1595	0.1292	0.1688	0.0526	0.1236	0.0305	0.3234	0.0644	0.3434	0.0597	0.0816	0.2015	0.0997	0.085	0.1004	0.1104	0.0943	0.0236	0.2314	0.1391	0.0985	0.255	0.1035	0.0453	0.0643	0.0845	0.051	0.5224	0.3198	0.0709	0.2956	0.5106	0.384	0.4054	0.1496
eIF4EHP	0.0256	0.02	0.0048	0.4451	0.1208	0.2026	0.0803	0.1026	0.4111	0.4488	0.1986	0.031	0.0546	0.0089	0.0065	0.1795	0.0003	0.1177	0.1602	0.2475	0.1057	0.374	0.2654	0.0897	0.1112	0.0377	0.0012	0.0418	0.108	0.0339	0.1108	0.4371	0.216	0.0064	0.0951	0.0026	0.0399	0.0478	0.213	0.1121	0.2817	0.0658	0.034	0.0288	0.1529	0.0903	0.4457	0.3853	0.0088
Myd88	0.0026	0.4237	0.0075	0.4431	0.3418	0.0844	0.0225	0.1359	0.4894	0.2508	0.3701	0.0292	0.0399	0.1034	0.0272	0.0593	0.023	0.3577	0.3481	0.2684	0.0006	0.2124	0.1525	0.2532	0.2126	0.1681	0.0727	0.1493	0.148	0.0044	0.1425	0.084	0.1245	0.0809	0.0423	0.0425	0.2737	0.1587	0.4058	0.2582	0.1842	0.0506	0.1953	0.1905	0.1629	0.1183	0.3117	0.3338	0.039
coro	0.3001	0.1166	0.1176	0.0041	0.0006	0.0439	0.1513	0.0271	0.003	0.007	0.1797	0.069	0.1874	0.0935	0.4386	0.1518	0.3869	0.0261	0.0093	0.0042	0.2084	0.0036	0.1326	0.0039	0.0037	0.286	0.1252	0.0938	0.0219	0.0909	0.0181	0.1692	0.0275	0.4798	0.0507	0.4958	0.0491	0.1259	0.0014	0.0145	0.1918	0.1779	0.3642	0.1527	0.1339	0.1682	0.0185	0.3275	0.3801
Pfrx	0.1594	0.3721	0.3634	0.0144	0.1315	0.0023	0.4327	0.1619	0.0582	0.0003	0.0095	0.345	0.0004	0.4411	0.0479	0.11	0.0767	0.1217	0.0238	0.053	0.3739	0.0105	0.0014	0.1588	0.1326	0.3076	0.3921	0.3361	0.1461	0.511	0.1514	0.398	0.0011	0.0287	0.3549	0.0457	0.1752	0.3334	0.0042	0.1097	0.3654	0.0038	0.358	0.2962	0.0672	0.0041	0.0109	0.2706	0.0565
CG45089	0.0398	0.1033	0.0687	0.0692	0.0493	0.328	0.0401	0.0019	0.0576	0.1468	0.4691	0.0512	0.475	0.0795	0.1621	0.5428	0.0961	0.0361	0.0003	0.0288	0.1456	0.0964	0.295	0.0353	0.0037	0.2216	0.1125	0.0323	0.0014	0.0219	0.0018	0.208	0.3245	0.0979	0.0102	0.0993	0.0278	0.0638	0.0106	0.0042	0.1028	0.3416	0.5491	0.0781	0.4204	0.3087	0.0728	0.2966	0.0824
unc-13-4A	0.0639	0.3906	0.151	0.0345	0.2918	0.0004	0.2696	0.3817	0.0937	0.0025	0.0084	0.4249	0	0.2711	0.0201	0.0234	0.0128	0.2598	0.1656	0.1495	0.3835	0.0112	0.0096	0.3667	0.3648	0.1954	0.1771	0.3968	0.3717	0.2504	0.3952	0.3851	0.0019	0.008	0.4805	0.0141	0.464	0.1957	0.0681	0.2681	0.4644	0.0004	0.1691	0.1158	0.0275	0.0039	0.0537	0.23	0.0161
Mo25	0.105	0.2655	0.1512	0.3267	0.3537	0.0486	0.0385	0.3633	0.4383	0.0361	0.1465	0.3674	0.0117	0.1072	0.0421	0.0422	0.0339	0.1741	0.2076	0.2397	0.4455	0.0211	0.2014	0.5223	0.5992	0.0303	0.1662	0.3974	0.3631	0.1748	0.3947	0.1496	0.0694	0.0816	0.556	0.0724	0.5724	0.4542	0.1157	0.2686	0.355	0.1091	0.1064	0.1221	0.177	0.1242	0.2964	0.2327	0.0488
28SrRNA-Psi:CR41609	0.0013	0.137	0.0053	0.3774	0.1205	0.2084	0.0034	0.0898	0.2288	0.2685	0.158	0.1153	0.0358	0.0255	0.0312	0.1099	0.0157	0.2144	0.1966	0.1767	0.1921	0.3537	0.2111	0.0768	0.0767	0.0944	0.0105	0.0864	0.0883	0.0063	0.0868	0.3958	0.2383	0.0156	0.0252	0.0381	0.072	0.0244	0.3878	0.1354	0.1789	0.0296	0.3898	0.0021	0.1782	0.034	0.4847	0.2305	0.0021
CG33111	0.1027	0.0729	0.1206	0.0946	0.2579	0.0161	0.239	0.234	0.1567	0.0898	0.0569	0.2239	0.0066	0.0694	0.0531	0.0079	0.0084	0.3137	0.4652	0.3847	0.2488	0.0437	0.0445	0.2493	0.2422	0.1976	0.1008	0.1567	0.2408	0.1843	0.2384	0.3673	0.018	0.0173	0.2271	0.0084	0.1608	0.1715	0.3336	0.3568	0.3139	0.0196	0.0203	0.0738	0.0066	0.0166	0.1832	0.4549	0.0227
MESK2	0.0328	0.3362	0.0088	0.0778	0.3715	0.0076	0.2017	0.2526	0.1653	0.032	0.02	0.1995	0.005	0.1567	0.0059	0.0674	0.0033	0.4398	0.355	0.2685	0.1637	0.0568	0.0075	0.4148	0.3303	0.2845	0.013	0.1079	0.2736	0.0694	0.2572	0.4782	0.0048	0.0009	0.1212	0.0001	0.3311	0.0199	0.2016	0.3825	0.4566	0.0005	0.2449	0.0495	0.0042	0.0003	0.1044	0.5097	0.0026
CG1161	0.0825	0.1402	0.1056	0.0024	0.0046	0.1275	0.0533	0.0217	0.0006	0.0489	0.3598	0.0823	0.3189	0.0929	0.2727	0.2873	0.2275	0.043	0.0071	0.0023	0.2025	0.0094	0.1927	0.0067	0.0021	0.2192	0.1235	0.1006	0.0166	0.0503	0.0095	0.1402	0.0929	0.2752	0.0202	0.3882	0.0621	0.089	0.0066	0.0194	0.0802	0.3533	0.2672	0.0733	0.2623	0.3535	0.0417	0.4739	0.1637
CG34141	0.0317	0.3363	0.0311	0.0679	0.3471	0.006	0.2021	0.2431	0.1676	0.0191	0.005	0.2353	0.0002	0.1806	0.0092	0.0378	0.0019	0.4892	0.3697	0.31	0.2227	0.0556	0.0093	0.3525	0.2736	0.2588	0.0629	0.1605	0.2579	0.0846	0.2339	0.4739	0.0064	0.0007	0.1817	0.0014	0.2853	0.034	0.2103	0.4157	0.3447	0.0005	0.2092	0.0366	0.0098	0.0006	0.096	0.3022	0.0035
Cirl	0.0187	0.1563	0.0008	0.1356	0.2923	0.0168	0.1061	0.2528	0.2704	0.0459	0.0132	0.1791	0.0009	0.0758	0.0012	0.0869	0	0.399	0.3636	0.3964	0.2555	0.0796	0.0206	0.281	0.2601	0.132	0.0022	0.1067	0.2655	0.0615	0.2362	0.4342	0.0176	0.0003	0.1292	0.0002	0.2373	0.0183	0.2258	0.3853	0.3382	0.001	0.2158	0.0182	0.031	0.0011	0.1081	0.379	0.0001
RtGEF	0.0076	0.0495	0.0012	0.5251	0.1213	0.193	0.047	0.1118	0.3516	0.3781	0.1309	0.0378	0.0262	0.0197	0.0003	0.2371	0	0.1394	0.1991	0.2367	0.1375	0.3981	0.2011	0.0947	0.1169	0.0229	0.0027	0.0605	0.1148	0.0159	0.1122	0.3415	0.2119	0.0005	0.0706	0.0018	0.0807	0.0254	0.2622	0.1168	0.2544	0.0126	0.1103	0.0132	0.1797	0.0445	0.4979	0.4678	0.0003
RpL23A	0.1108	0.3128	0.4076	0.1983	0.2234	0.0217	0.1808	0.2869	0.1825	0.0247	0.2591	0.4261	0.0183	0.4374	0.1243	0.0321	0.145	0.0911	0.1357	0.0478	0.3079	0.0088	0.0729	0.2554	0.2709	0.2772	0.5143	0.3045	0.284	0.385	0.2896	0.0373	0.0258	0.1597	0.359	0.0858	0.2542	0.4409	0.0281	0.2048	0.0833	0.0293	0.2594	0.4457	0.1003	0.0622	0.2271	0.4681	0.1258
Nmnat	0.0213	0.4426	0.0596	0.187	0.0482	0.4058	0.1875	0.0178	0.1705	0.2515	0.3112	0.0818	0.4354	0.2452	0.1319	0.2636	0.1711	0.075	0.0387	0.0851	0.1218	0.0618	0.3463	0.0861	0.0479	0.4327	0.1442	0.0334	0.0178	0.0332	0.0133	0.0725	0.3721	0.0959	0.0051	0.216	0.12	0.0035	0.076	0.0164	0.1591	0.1556	0.1778	0.0949	0.4484	0.199	0.2797	0.4624	0.0815
CG5214	0.0731	0.1209	0.0891	0.0776	0.0292	0.2804	0.1683	0.0002	0.1183	0.0615	0.3864	0.025	0.4012	0.1005	0.2018	0.4527	0.1206	0.0277	0.0001	0.0534	0.062	0.0481	0.3264	0.0467	0.007	0.4208	0.1228	0.0085	0.0004	0.0475	0.0008	0.2316	0.2572	0.1856	0.0209	0.1655	0.0252	0.077	0.0026	0.0001	0.2358	0.441	0.4946	0.121	0.4126	0.4702	0.0267	0.1834	0.1228
Sar1	0.0013	0.082	0.0045	0.1291	0.0995	0.415	0.0001	0.0636	0.0922	0.3923	0.4149	0.026	0.1258	0.0133	0.0264	0.2773	0.013	0.1247	0.0731	0.1119	0.1035	0.4103	0.4928	0.038	0.0495	0.0198	0.0233	0.095	0.0639	0.001	0.0575	0.4677	0.4702	0.0348	0.0161	0.025	0.0686	0.0617	0.1216	0.0879	0.352	0.1094	0.1979	0.0255	0.3148	0.1814	0.1832	0.4568	0.0119
KrT95D	0.0112	0.0819	0.0028	0.3669	0.1276	0.0873	0.0323	0.1447	0.4327	0.1086	0.058	0.0966	0.0065	0.0113	0.0018	0.1162	0.0003	0.4193	0.4618	0.418	0.307	0.1564	0.15	0.0909	0.1155	0.0172	0.0004	0.093	0.1404	0.0195	0.1224	0.4813	0.1018	0.0012	0.0773	0.0116	0.1174	0.0459	0.3569	0.3413	0.2966	0.0146	0.1458	0.0066	0.1387	0.0266	0.2718	0.266	0.0005
CG14207	0.1069	0.3211	0.3397	0.0091	0.128	0.0009	0.4729	0.1912	0.03	0.0009	0.0161	0.3789	0.0028	0.4381	0.0376	0.0727	0.0686	0.137	0.0552	0.031	0.4617	0.0055	0.0003	0.1436	0.1308	0.3723	0.4046	0.3578	0.1765	0.4587	0.1688	0.2984	0.0001	0.0278	0.3641	0.0258	0.1797	0.3001	0.0107	0.1661	0.2864	0.0039	0.2797	0.341	0.0328	0.0045	0.024	0.3862	0.056
CG7772	0.3947	0.0594	0.4038	0.1129	0.3478	0.1404	0.3088	0.283	0.2326	0.0763	0.1815	0.2996	0.129	0.1575	0.3589	0.0463	0.2105	0.4853	0.1153	0.3926	0.2039	0.0152	0.3274	0.4548	0.405	0.1256	0.2187	0.4538	0.2886	0.3751	0.319	0.3579	0.1048	0.2471	0.2959	0.18	0.3842	0.4094	0.1178	0.1515	0.3244	0.367	0.0756	0.1824	0.0594	0.2566	0.0804	0.3476	0.2465
Plc21C	0.0111	0.1355	0.0186	0.2995	0.1152	0.3672	0.0916	0.0147	0.2641	0.3486	0.287	0.0564	0.2153	0.0691	0.0546	0.3098	0.0243	0.0629	0.0294	0.0901	0.0741	0.3067	0.3016	0.1022	0.0577	0.3359	0.0609	0.0096	0.0194	0.0142	0.0261	0.2325	0.3889	0.0253	0.0165	0.0302	0.0489	0.0133	0.0705	0.0311	0.154	0.0672	0.4795	0.0387	0.1932	0.0922	0.302	0.4038	0.0195
eIF1A	0.1167	0.019	0.0648	0.0611	0.0644	0.2556	0.0044	0.0828	0.0285	0.2037	0.3366	0.0949	0.4672	0.0069	0.2678	0.3157	0.1528	0.0494	0.0516	0.0221	0.2121	0.3305	0.2361	0.0192	0.0308	0.066	0.0331	0.1146	0.0729	0.0568	0.0753	0.4296	0.2625	0.2414	0.0626	0.2069	0.0239	0.129	0.0786	0.088	0.2001	0.5473	0.297	0.0307	0.3726	0.5402	0.1557	0.4196	0.1147
Fum1	0.0701	0.1322	0.0861	0.0874	0.0307	0.2901	0.1729	0.0001	0.1195	0.0767	0.4367	0.0277	0.5759	0.1023	0.1849	0.4266	0.1131	0.0278	0.0001	0.0505	0.0752	0.0412	0.3425	0.0572	0.0094	0.4232	0.1245	0.0077	0.0003	0.0461	0.0007	0.2018	0.2703	0.1548	0.0197	0.1467	0.0362	0.0602	0.0044	0.0001	0.1972	0.3821	0.5467	0.1175	0.4197	0.4117	0.045	0.2075	0.1087
Iml1	0.0004	0.1619	0.0134	0.075	0.0744	0.4912	0.011	0.0254	0.0625	0.2786	0.4141	0.0218	0.2459	0.0543	0.0352	0.4273	0.0298	0.1201	0.0355	0.0763	0.0844	0.195	0.5656	0.026	0.0262	0.0615	0.0784	0.0711	0.0271	0.0001	0.0181	0.2943	0.3971	0.0531	0.0034	0.0784	0.0761	0.0488	0.0629	0.0448	0.2733	0.1211	0.4196	0.048	0.5445	0.219	0.1095	0.4789	0.0218
CanB2	0.405	0.098	0.108	0.3466	0.02	0.2595	0.4587	0.0719	0.3292	0.1187	0.4932	0.0845	0.3142	0.1415	0.3201	0.2148	0.271	0.0127	0.093	0.1051	0.1991	0.1428	0.4631	0.1006	0.0911	0.4263	0.0868	0.0354	0.0695	0.1485	0.07	0.1259	0.3055	0.2622	0.0905	0.1984	0.0651	0.0537	0.0585	0.0403	0.2316	0.4162	0.4396	0.1992	0.4549	0.4526	0.3469	0.1221	0.3217
alphaTub84B	0.3615	0.2734	0.2466	0.0144	0.5417	0.1022	0.3226	0.5765	0.0904	0.0775	0.0196	0.4555	0.1206	0.4453	0.1159	0.3984	0.1226	0.3632	0.1435	0.3013	0.3519	0.1123	0.0499	0.3926	0.6067	0.4554	0.1309	0.3676	0.5926	0.4279	0.5889	0.2148	0.0513	0.0483	0.5396	0.0403	0.5439	0.1225	0.164	0.3784	0.3115	0.1317	0.3939	0.2159	0.0642	0.0839	0.0102	0.483	0.1257
msi	0.0177	0.2818	0.0214	0.1922	0.0508	0.4976	0.1743	0.0069	0.2424	0.2151	0.4659	0.0088	0.344	0.1087	0.0543	0.4092	0.063	0.0908	0.0396	0.2127	0.0174	0.1533	0.3346	0.0979	0.0671	0.4424	0.1009	0.019	0.0094	0.0131	0.0106	0.3465	0.4548	0.0762	0.003	0.0502	0.1054	0.0197	0.0715	0.0093	0.5113	0.1246	0.5553	0.1444	0.4233	0.2232	0.1433	0.1688	0.0633
aop	0.3254	0.0168	0.1827	0.1742	0.0118	0.1151	0.3287	0.0764	0.138	0.0436	0.3072	0.1278	0.2029	0.0771	0.4985	0.2705	0.3629	0.0048	0.0859	0.0355	0.3504	0.1325	0.1738	0.033	0.0533	0.3591	0.0889	0.0695	0.0694	0.1997	0.0741	0.1777	0.1371	0.4741	0.1325	0.3848	0.0219	0.1784	0.0232	0.0628	0.1555	0.2132	0.412	0.1651	0.4596	0.2202	0.2	0.2059	0.4709
inc	0.4045	0.0025	0.1052	0.166	0.0433	0.2309	0.1827	0.068	0.1204	0.0749	0.3721	0.0627	0.3179	0.0067	0.3432	0.45	0.1704	0.0276	0.0376	0.0344	0.2044	0.191	0.1776	0.0187	0.0254	0.1436	0.0627	0.0577	0.0651	0.1202	0.0689	0.2824	0.2173	0.3412	0.1191	0.3347	0.0003	0.1541	0.0122	0.0567	0.1125	0.2265	0.0886	0.1073	0.418	0.2449	0.1142	0.3181	0.2962
Piezo	0.0067	0.2587	0.0013	0.2768	0.1219	0.0371	0.0897	0.0944	0.4275	0.1127	0.0234	0.0684	0.0064	0.0767	0	0.1721	0	0.3498	0.4463	0.5054	0.1318	0.2453	0.0438	0.1193	0.1191	0.1586	0.0071	0.0516	0.1012	0.0127	0.0987	0.3601	0.0508	0	0.0377	0.0007	0.1436	0.0057	0.4045	0.1649	0.3182	0.0023	0.2467	0.0134	0.1021	0.0098	0.2517	0.3459	0.0002
Cox17	0.1169	0.1884	0.1118	0.0083	0.0034	0.1154	0.1461	0.0162	0.0081	0.0371	0.3967	0.0864	0.2673	0.1125	0.3222	0.2108	0.2851	0.0276	0.0062	0.0037	0.2041	0.0019	0.2012	0.0142	0.004	0.3766	0.1278	0.0752	0.0127	0.069	0.0075	0.0838	0.0868	0.3031	0.0322	0.4414	0.0672	0.0736	0.0044	0.0113	0.0516	0.3303	0.2181	0.0879	0.2412	0.349	0.0614	0.4527	0.2192
CG6218	0.127	0.0083	0.0416	0.3694	0.108	0.3982	0.0155	0.1253	0.1473	0.3529	0.1975	0.1757	0.1385	0.0048	0.1004	0.1909	0.0427	0.1769	0.3129	0.0773	0.4996	0.3591	0.4726	0.0371	0.0822	0.0126	0.0063	0.1121	0.1218	0.0633	0.1196	0.2814	0.4038	0.0724	0.0985	0.1197	0.0414	0.1121	0.3364	0.2248	0.0707	0.2908	0.2099	0.0013	0.2706	0.2462	0.4383	0.1469	0.0298
Chd64	0.0001	0.2159	0.002	0.2279	0.0982	0.2853	0.007	0.0649	0.167	0.4506	0.2546	0.0188	0.0528	0.0366	0.0049	0.3374	0.0055	0.2495	0.1333	0.2351	0.0844	0.4263	0.2785	0.0584	0.076	0.0413	0.0375	0.0827	0.0707	0.0004	0.0608	0.4444	0.358	0.0127	0.0132	0.0234	0.1024	0.0265	0.2507	0.0872	0.4044	0.0425	0.2837	0.0281	0.3867	0.0822	0.2793	0.4126	0.0045
CG5867	0.2327	0.355	0.1217	0.0022	0.0027	0.0317	0.1403	0.0103	0.0027	0.0105	0.1556	0.0637	0.1601	0.201	0.4903	0.0886	0.4884	0.0518	0.0046	0.0093	0.1958	0.0014	0.1041	0.0059	0.0019	0.3775	0.1712	0.0873	0.0066	0.0493	0.0029	0.1698	0.0214	0.4686	0.02	0.371	0.0715	0.121	0.004	0.006	0.2434	0.2419	0.2006	0.2144	0.0697	0.2076	0.0156	0.4638	0.4301
tweek	0.003	0.1264	0.0033	0.3754	0.1223	0.2508	0.0168	0.0644	0.2904	0.4702	0.191	0.0574	0.0624	0.0288	0.011	0.2417	0.0028	0.1095	0.0698	0.1611	0.0951	0.4836	0.1835	0.0973	0.0873	0.1433	0.0196	0.0406	0.0671	0.0043	0.069	0.3067	0.2596	0.0061	0.0266	0.0064	0.0717	0.0148	0.1683	0.0819	0.2222	0.0363	0.3181	0.0127	0.1626	0.0269	0.3981	0.4578	0.0027
ND-B15	0.0658	0.1097	0.0981	0.0329	0.0137	0.2249	0.1256	0	0.0417	0.0697	0.4196	0.0323	0.4067	0.1049	0.2043	0.3943	0.1164	0.0291	0.0002	0.0242	0.1308	0.0188	0.2732	0.0266	0.0022	0.3159	0.127	0.0255	0.0001	0.0447	0.0001	0.1905	0.2036	0.1701	0.0193	0.1642	0.0391	0.0743	0.0027	0	0.1483	0.459	0.5785	0.1168	0.5181	0.4644	0.0217	0.2568	0.1165
Rim2	0.4204	0.4599	0.4598	0.0239	0.1339	0.0327	0.461	0.0953	0.1152	0.0013	0.006	0.1546	0.023	0.4032	0.1663	0.2321	0.2081	0.1131	0.0061	0.141	0.0908	0.0272	0.0524	0.1672	0.1257	0.2402	0.5268	0.2001	0.0926	0.3047	0.1282	0.3809	0.0281	0.1017	0.1824	0.1773	0.1385	0.4778	0.0062	0.0299	0.3756	0.0771	0.4546	0.2937	0.1777	0.0433	0.0014	0.076	0.1583
nonA	0.0301	0.1505	0.0432	0.3968	0.0952	0.4262	0.2365	0.0353	0.3213	0.3424	0.2171	0.0895	0.3174	0.1152	0.0795	0.492	0.0493	0.0331	0.0574	0.0829	0.1502	0.2347	0.2529	0.1224	0.0939	0.4965	0.073	0.0073	0.0415	0.0659	0.0495	0.118	0.4113	0.0207	0.0406	0.0383	0.0841	0.0005	0.0828	0.0354	0.0715	0.0775	0.3128	0.048	0.2169	0.0988	0.438	0.3852	0.0344
rgn	0.0695	0.1468	0.2219	0.4291	0.4559	0.1771	0.3045	0.4678	0.3958	0.1848	0.2624	0.253	0.0832	0.4135	0.0447	0.3684	0.1688	0.1625	0.2292	0.1229	0.244	0.3418	0.0861	0.4094	0.3983	0.3495	0.4102	0.4984	0.4809	0.211	0.4526	0.3324	0.234	0.1166	0.2647	0.0996	0.2242	0.216	0.1564	0.4754	0.0804	0.0464	0.4165	0.4811	0.4123	0.1223	0.3626	0.3574	0.1331
CycG	0.4044	0.387	0.3019	0.001	0.2442	0.0022	0.2919	0.2538	0.0084	0.0053	0.0036	0.4051	0.0064	0.5142	0.0974	0.1309	0.0932	0.3022	0.039	0.0812	0.4278	0.0211	0.0008	0.1731	0.2433	0.479	0.2842	0.5907	0.239	0.3873	0.2658	0.4792	0.002	0.0377	0.3	0.0386	0.3741	0.2861	0.039	0.1408	0.4623	0.0044	0.1954	0.3	0.0476	0.0066	0.0068	0.385	0.137
Svil	0.0006	0.1414	0.0017	0.323	0.1164	0.2564	0.0113	0.0709	0.241	0.5247	0.2184	0.0199	0.0495	0.0292	0.001	0.2981	0.001	0.1394	0.0999	0.2023	0.0811	0.4653	0.2418	0.0815	0.0895	0.0554	0.0238	0.0583	0.0746	0.0008	0.0686	0.3707	0.2959	0.0052	0.0196	0.0079	0.0921	0.02	0.1863	0.0864	0.3246	0.0337	0.1986	0.0257	0.2659	0.0582	0.3371	0.474	0.0032
Irk1	0.4113	0.1447	0.3988	0.135	0.2533	0.1735	0.3076	0.2097	0.3069	0.0451	0.1537	0.2165	0.1239	0.2853	0.3405	0.1174	0.2616	0.222	0.0451	0.3216	0.0805	0.0172	0.3995	0.3256	0.2639	0.0654	0.3913	0.2704	0.2166	0.2947	0.2528	0.3773	0.143	0.2962	0.227	0.2845	0.3541	0.2745	0.0624	0.0669	0.3682	0.369	0.1443	0.2532	0.186	0.3197	0.0657	0.1712	0.2913
sws	0.0423	0.0481	0.0285	0.0776	0.053	0.3911	0.0146	0.0409	0.0912	0.1654	0.3354	0.007	0.3727	0.0135	0.1009	0.3818	0.0475	0.1003	0.0453	0.1243	0.0507	0.3051	0.3081	0.0294	0.0382	0.0581	0.0427	0.0826	0.0407	0.0156	0.0406	0.4065	0.345	0.1549	0.033	0.0643	0.0408	0.1123	0.0595	0.0531	0.5157	0.3725	0.1067	0.0995	0.3933	0.4661	0.0506	0.1582	0.0752
Rho1	0.3675	0.4407	0.5037	0.1756	0.4523	0.4863	0.1994	0.5867	0.2385	0.398	0.2231	0.328	0.5264	0.2224	0.4345	0.1862	0.4653	0.2411	0.2562	0.4351	0.279	0.5127	0.1724	0.2799	0.3409	0.178	0.4314	0.441	0.5913	0.264	0.5918	0.1267	0.3716	0.2968	0.5241	0.2706	0.2987	0.2021	0.3286	0.5417	0.379	0.2681	0.1179	0.4603	0.4061	0.2381	0.085	0.2631	0.4215
CG44325	0.329	0.1809	0.1111	0.0067	0.0045	0.0651	0.1511	0.0057	0.03	0.0043	0.0462	0.0131	0.1681	0.077	0.4957	0.2826	0.4188	0.0699	0.002	0.0624	0.0613	0.0266	0.0791	0.0067	0.0029	0.3198	0.1583	0.061	0.0055	0.0543	0.004	0.45	0.0415	0.3749	0.031	0.4465	0.0255	0.2628	0.0022	0.005	0.4874	0.2086	0.3562	0.3473	0.1667	0.1421	0.0009	0.1485	0.471
Atg4a	0.212	0.2706	0.1319	0.0645	0.0237	0.1405	0.2291	0.0162	0.052	0.0704	0.4517	0.1435	0.2523	0.2264	0.4681	0.2643	0.4101	0.0171	0.0047	0.0045	0.2524	0.0124	0.2776	0.0356	0.0076	0.4261	0.1722	0.0432	0.0134	0.0911	0.0123	0.0449	0.1273	0.3733	0.0407	0.4481	0.045	0.0621	0.0073	0.0115	0.0249	0.3854	0.1868	0.0984	0.3441	0.425	0.1379	0.34	0.3027
ATP8A	0.0062	0.4236	0.002	0.3908	0.1171	0.076	0.0666	0.0904	0.5132	0.1282	0.0444	0.0742	0.0171	0.1457	0.0011	0.3027	0.0025	0.3885	0.4751	0.5131	0.1389	0.3291	0.0568	0.1315	0.1188	0.2016	0.0171	0.0665	0.0934	0.0103	0.0895	0.3386	0.0868	0.0007	0.0239	0.0018	0.2207	0.0052	0.3665	0.1572	0.3838	0.0088	0.4205	0.0201	0.1797	0.022	0.2721	0.3748	0.0008
VhaSFD	0.1133	0.0311	0.113	0.0417	0.0279	0.1925	0.0614	0.0257	0.0253	0.0669	0.383	0.0912	0.3811	0.032	0.2558	0.5105	0.1406	0.0144	0.0016	0.0032	0.1993	0.0725	0.227	0.0052	0.0001	0.1866	0.0994	0.067	0.0189	0.0808	0.0231	0.1924	0.1921	0.2322	0.0688	0.2531	0.0024	0.116	0.0029	0.0229	0.0506	0.6122	0.4588	0.0696	0.415	0.5808	0.0578	0.3834	0.1276
VhaPPA1-1	0.2604	0.1504	0.1456	0.017	0.0295	0.0995	0.0733	0.0104	0.0194	0.034	0.1508	0.1008	0.2224	0.0747	0.4246	0.4898	0.4376	0.0438	0.0006	0.0083	0.1595	0.0552	0.0988	0.0058	0	0.3502	0.166	0.065	0.0084	0.0627	0.007	0.3596	0.0746	0.4258	0.0365	0.3701	0.0105	0.2344	0.0034	0.0122	0.1559	0.2594	0.4741	0.1377	0.3318	0.2637	0.019	0.477	0.4146
CG7778	0.3276	0.2851	0.3494	0.0284	0.0758	0.0761	0.4152	0.0266	0.0841	0.0239	0.1413	0.1793	0.1108	0.4455	0.3377	0.1238	0.2883	0.1034	0.0081	0.0846	0.1493	0.004	0.2523	0.1462	0.0824	0.1725	0.4901	0.1477	0.0284	0.1727	0.0393	0.235	0.0638	0.3277	0.0496	0.2528	0.2261	0.2025	0.0178	0.009	0.3736	0.3804	0.0634	0.5012	0.1449	0.3158	0.0395	0.3394	0.4028
smash	0.0078	0.1419	0.0005	0.4249	0.1198	0.1464	0.0964	0.0933	0.4306	0.3336	0.0723	0.044	0.024	0.046	0	0.3006	0	0.1538	0.2252	0.3053	0.1214	0.4278	0.0858	0.1081	0.1202	0.1078	0.0104	0.0438	0.0999	0.0124	0.0981	0.2824	0.1743	0.0001	0.0404	0.0005	0.1054	0.0052	0.3223	0.104	0.2687	0.0085	0.2462	0.0205	0.1827	0.0206	0.4262	0.4615	0.0007
Lpin	0.0662	0.4167	0.1561	0.0448	0.2321	0.0008	0.2534	0.3321	0.1055	0.0021	0.0216	0.4812	0	0.3893	0.0155	0.0527	0.0231	0.1828	0.1213	0.0867	0.3772	0.0075	0.0095	0.2654	0.274	0.2433	0.2633	0.5223	0.3201	0.2524	0.3323	0.2759	0.0005	0.0116	0.4805	0.01	0.2813	0.194	0.0312	0.2292	0.3335	0.0016	0.2139	0.1906	0.0328	0.0043	0.046	0.3347	0.0218
CG11699	0.015	0.4641	0.0137	0.4553	0.1069	0.1186	0.2562	0.0188	0.415	0.4452	0.1633	0.022	0.1068	0.2059	0.0211	0.2963	0.0176	0.2002	0.1143	0.4763	0.0043	0.4199	0.0838	0.1181	0.0826	0.5168	0.0679	0.0042	0.0267	0.0116	0.0332	0.4052	0.1733	0.0252	0.0164	0.0325	0.0955	0.0089	0.2573	0.0327	0.4162	0.0511	0.3934	0.1194	0.1774	0.0607	0.4072	0.3832	0.0308
drongo	0.2663	0.2584	0.2469	0.135	0.4764	0.103	0.2958	0.494	0.2779	0.0336	0.0386	0.4518	0.0266	0.2878	0.0458	0.3412	0.0755	0.3676	0.0606	0.2716	0.2846	0.0721	0.0936	0.4666	0.5026	0.1012	0.1698	0.4667	0.4899	0.3975	0.5037	0.4232	0.0821	0.0321	0.4619	0.0367	0.4795	0.2485	0.0599	0.3248	0.4907	0.0553	0.341	0.155	0.2358	0.0592	0.0462	0.3654	0.0565
CG10584	0.0991	0.1634	0.0295	0.2657	0.1075	0.2071	0.4385	0.0667	0.3141	0.5101	0.1258	0.0606	0.19	0.1213	0.051	0.4014	0.0299	0.0486	0.2034	0.3566	0.1056	0.4919	0.0831	0.1234	0.119	0.4401	0.0368	0.0035	0.0751	0.0852	0.0856	0.205	0.193	0.0198	0.0789	0.0157	0.0787	0.0064	0.2394	0.0594	0.2506	0.0842	0.3709	0.1046	0.1216	0.0764	0.3701	0.2424	0.0564
osp	0.0116	0.3221	0.0156	0.4276	0.1021	0.2356	0.1821	0.0413	0.3667	0.4813	0.1195	0.0347	0.1032	0.1219	0.0125	0.4514	0.0114	0.154	0.0967	0.257	0.0762	0.3022	0.1406	0.098	0.0825	0.2759	0.0717	0.0212	0.0486	0.011	0.0451	0.207	0.3005	0.0111	0.0189	0.036	0.1	0.0059	0.1844	0.0552	0.2476	0.0491	0.4661	0.0476	0.3181	0.0614	0.4203	0.4142	0.0157
CG3021	0.3606	0.3437	0.3574	0.179	0.4332	0.2962	0.2947	0.4801	0.2175	0.2405	0.141	0.4772	0.2561	0.3233	0.1855	0.2171	0.3066	0.4532	0.1946	0.274	0.4423	0.3946	0.0842	0.3856	0.4711	0.3434	0.384	0.4353	0.4857	0.5307	0.4802	0.2368	0.2343	0.1456	0.4268	0.1159	0.3167	0.131	0.2065	0.5178	0.4072	0.1547	0.2697	0.4911	0.416	0.1612	0.0898	0.2786	0.2531
CG34117	0.0008	0.128	0.001	0.2577	0.1093	0.3367	0.0081	0.0844	0.1842	0.4799	0.2487	0.0331	0.0714	0.0395	0.0016	0.3853	0.0039	0.1247	0.113	0.1503	0.1275	0.4315	0.2817	0.0932	0.1073	0.0582	0.0172	0.0857	0.0857	0.002	0.0806	0.2987	0.366	0.0043	0.0153	0.0036	0.1157	0.0158	0.1717	0.0943	0.3501	0.0334	0.3498	0.0267	0.2965	0.0774	0.3716	0.4251	0.0021
tara	0.1632	0.4551	0.2654	0.0059	0.2858	0.0002	0.4967	0.3491	0.0208	0.0028	0.0139	0.4726	0.0009	0.419	0.0298	0.0614	0.0324	0.2121	0.06	0.0377	0.3982	0.0064	0.0005	0.2661	0.3337	0.3336	0.2935	0.529	0.3317	0.4239	0.3593	0.2967	0	0.0163	0.4341	0.0112	0.3646	0.2858	0.0265	0.2221	0.3222	0.0005	0.1604	0.2973	0.0222	0.002	0.0285	0.4812	0.0528
18SrRNA-Psi:CR41602	0.3304	0.1358	0.1105	0.0993	0.0003	0.1499	0.3492	0.0331	0.1186	0.0281	0.3291	0.0306	0.2512	0.1073	0.2732	0.1262	0.2463	0.036	0.0396	0.0716	0.1457	0.0232	0.2335	0.0409	0.0425	0.3827	0.1204	0.0464	0.0315	0.1059	0.0279	0.1836	0.1275	0.3256	0.0797	0.3111	0.0723	0.0892	0.0098	0.0157	0.3261	0.2849	0.4661	0.2213	0.2382	0.2507	0.0754	0.1646	0.353
Las	0.0066	0.1434	0.0006	0.4709	0.1183	0.2134	0.0793	0.0817	0.3634	0.4349	0.1369	0.0332	0.0426	0.0474	0	0.3462	0.0001	0.1286	0.1294	0.2402	0.1044	0.4859	0.1399	0.1049	0.1137	0.1088	0.0185	0.0393	0.087	0.0076	0.0844	0.2709	0.2321	0.0007	0.032	0.0012	0.1048	0.0072	0.2188	0.0916	0.2816	0.0215	0.2618	0.0284	0.2042	0.025	0.4662	0.4926	0.0018
CG3529	0.3031	0.0203	0.154	0.1975	0.4325	0.1242	0.2006	0.5546	0.397	0.119	0.1153	0.336	0.0756	0.0333	0.0876	0.1105	0.0331	0.4201	0.2322	0.4494	0.3946	0.0529	0.3205	0.2695	0.3799	0.0221	0.0409	0.345	0.5439	0.3357	0.4813	0.4144	0.1244	0.1021	0.5315	0.0914	0.2383	0.4042	0.2691	0.3167	0.3162	0.2245	0.0372	0.082	0.1351	0.2212	0.2163	0.2698	0.1096
Sod2	0.0129	0.1311	0.0134	0.2856	0.103	0.3888	0.1383	0.0103	0.2877	0.2844	0.3414	0.0212	0.2639	0.0951	0.0371	0.3931	0.0227	0.072	0.0358	0.122	0.0377	0.2813	0.3246	0.1096	0.0716	0.3462	0.0654	0.0024	0.0124	0.0132	0.0212	0.2453	0.4191	0.0241	0.0172	0.0206	0.0628	0.0116	0.0666	0.0185	0.2796	0.0639	0.4207	0.0805	0.2178	0.1415	0.2569	0.2214	0.0271
Fit1	0.0133	0.1249	0.0298	0.3811	0.1135	0.3486	0.0658	0.0877	0.2046	0.4451	0.113	0.1134	0.1348	0.0722	0.0518	0.332	0.0269	0.0796	0.1088	0.0521	0.2391	0.3759	0.2879	0.0842	0.0783	0.1705	0.0368	0.0623	0.0903	0.0325	0.0868	0.0804	0.3548	0.0123	0.0496	0.0678	0.0766	0.0076	0.1759	0.0991	0.0171	0.065	0.399	0.0019	0.2407	0.0553	0.4595	0.1668	0.0066
osy	0.05	0.417	0.0495	0.0321	0.4399	0.0023	0.3518	0.3028	0.0767	0.0165	0.004	0.2588	0.0014	0.2729	0.0119	0.0525	0.0055	0.4778	0.3253	0.208	0.1968	0.0496	0.0023	0.4903	0.3721	0.341	0.0967	0.1612	0.3162	0.1408	0.3051	0.5046	0.003	0.0022	0.2244	0.0007	0.3701	0.0427	0.1801	0.4521	0.4162	0.0001	0.211	0.0919	0.0069	0.0007	0.0757	0.4058	0.0106
Chchd2	0.001	0.3048	0.0018	0.4267	0.2556	0.0601	0.0087	0.1605	0.4439	0.0703	0.0702	0.1627	0.0066	0.0794	0.0082	0.0749	0.0051	0.4979	0.5032	0.4956	0.2328	0.1474	0.0897	0.1838	0.1517	0.1135	0.007	0.1212	0.1654	0.0064	0.1318	0.4718	0.0686	0.0055	0.0349	0.0119	0.2424	0.0286	0.2855	0.3438	0.3674	0.0101	0.2837	0.0047	0.0938	0.0162	0.2889	0.2532	0.0007
CG10340	0.0014	0.087	0.0022	0.2435	0.1168	0.3871	0.0187	0.0499	0.1929	0.3391	0.3023	0.0106	0.1919	0.0295	0.0034	0.3806	0.0026	0.1237	0.0738	0.1119	0.0981	0.355	0.4211	0.0808	0.0807	0.0578	0.0266	0.036	0.0564	0.0008	0.0544	0.2403	0.4572	0.009	0.0188	0.0097	0.074	0.0232	0.0979	0.0735	0.2363	0.0556	0.2253	0.0383	0.2812	0.151	0.2687	0.3729	0.0065
bbx	0.0447	0.0225	0.0092	0.4116	0.1213	0.2702	0.1119	0.1267	0.3905	0.4555	0.1367	0.0991	0.0985	0.024	0.0231	0.2409	0.0048	0.0732	0.1643	0.1276	0.199	0.4223	0.2164	0.1225	0.1243	0.1126	0.0002	0.0459	0.1258	0.0776	0.1265	0.1814	0.229	0.0006	0.1001	0.0006	0.0597	0.0176	0.1914	0.1228	0.0707	0.0291	0.2425	0.0054	0.1529	0.0704	0.4249	0.4887	0.0004
ec	0.081	0.2517	0.294	0.3967	0.404	0.1096	0.1824	0.4174	0.3676	0.1142	0.3504	0.3039	0.0371	0.4442	0.0533	0.3324	0.1381	0.0652	0.1585	0.062	0.2409	0.1415	0.1389	0.4123	0.388	0.1703	0.4067	0.4019	0.4162	0.2521	0.4248	0.0803	0.1662	0.1633	0.4048	0.0934	0.2515	0.4278	0.0803	0.3401	0.0345	0.0428	0.289	0.4707	0.4555	0.1543	0.4149	0.3436	0.1501
Pdhb	0.0783	0.1292	0.0902	0.0459	0.0128	0.2299	0.1591	0.0001	0.082	0.0508	0.3644	0.026	0.3845	0.1023	0.2058	0.3984	0.1337	0.0261	0.0004	0.0471	0.0824	0.0269	0.3007	0.047	0.0089	0.4017	0.1263	0.0188	0	0.0498	0.0004	0.2156	0.217	0.1951	0.0137	0.1641	0.0419	0.0781	0.0027	0.0001	0.2526	0.4639	0.5555	0.1244	0.5236	0.4982	0.02	0.1662	0.1262
REPTOR	0.3027	0.4525	0.3956	0.0051	0.1189	0.0004	0.4886	0.1989	0.0172	0.0027	0.0481	0.3904	0.0025	0.431	0.0977	0.0385	0.0901	0.1389	0.0231	0.0218	0.487	0.0006	0.0012	0.134	0.1704	0.3484	0.387	0.437	0.1875	0.4427	0.21	0.1832	0	0.068	0.3065	0.0364	0.292	0.4553	0.0106	0.081	0.248	0.0028	0.1144	0.3897	0.0205	0.0056	0.0228	0.479	0.1263
beat-VII	0.099	0.2786	0.1757	0.0277	0.3636	0.0003	0.2865	0.4164	0.0871	0.003	0.0085	0.3983	0	0.2261	0.0162	0.0304	0.0104	0.2656	0.1204	0.1349	0.4216	0.0089	0.0099	0.4308	0.4418	0.1388	0.1768	0.3854	0.4053	0.2954	0.4485	0.3573	0.0016	0.0071	0.4871	0.012	0.4922	0.2403	0.0603	0.2805	0.4985	0.0003	0.1024	0.1333	0.0282	0.0019	0.049	0.2893	0.0186
Sik2	0.0752	0.4466	0.1541	0.0421	0.2942	0.008	0.2799	0.3539	0.1711	0.0008	0.0012	0.4361	0.0014	0.4474	0.0247	0.121	0.0336	0.2827	0.1455	0.2351	0.411	0.0335	0.0071	0.329	0.3279	0.2686	0.2048	0.4896	0.3432	0.2722	0.3741	0.3703	0.0054	0.0057	0.457	0.0279	0.3229	0.0867	0.0495	0.2596	0.3506	0.0017	0.4192	0.0753	0.0489	0.0007	0.0103	0.1467	0.0141
Vha13	0.0002	0.1137	0.0061	0.1828	0.1044	0.3886	0.0084	0.0624	0.117	0.4144	0.2511	0.0374	0.1314	0.0348	0.0093	0.3769	0.0072	0.1223	0.0729	0.0799	0.1402	0.3134	0.4202	0.048	0.0622	0.0383	0.0427	0.0741	0.067	0.001	0.0603	0.2191	0.447	0.0091	0.0232	0.0283	0.087	0.0194	0.1029	0.0864	0.1608	0.0528	0.3809	0.012	0.3311	0.1239	0.296	0.3665	0.0047
Keap1	0.0647	0.3979	0.0483	0.0362	0.5223	0.0032	0.406	0.3583	0.1022	0.0099	0.0006	0.325	0.0033	0.388	0.0107	0.129	0.0095	0.3826	0.2914	0.2117	0.2427	0.0777	0.0009	0.3685	0.4633	0.361	0.1299	0.2158	0.3783	0.126	0.356	0.4025	0.0037	0.0018	0.2319	0.0048	0.5626	0.029	0.1528	0.531	0.4073	0	0.3247	0.1012	0.0143	0.0001	0.0493	0.3035	0.0137
sona	0.4544	0.4275	0.4177	0.0024	0.0015	0.0019	0.2972	0.0397	0.0039	0.0016	0.0375	0.1375	0.021	0.3496	0.2638	0.0329	0.2317	0.1374	0.0219	0.0213	0.3887	0.0013	0.0032	0.0047	0.0046	0.3539	0.4462	0.216	0.0326	0.2106	0.0218	0.2666	0.0009	0.1553	0.0754	0.128	0.1416	0.454	0.004	0.0227	0.3608	0.0171	0.2886	0.5362	0.0223	0.0159	0.0072	0.4081	0.2472
mRpL42	0.0786	0.2126	0.0787	0.1228	0.0246	0.2904	0.237	0.0003	0.1745	0.0779	0.4382	0.0331	0.4041	0.1165	0.1831	0.3569	0.1499	0.0281	0.0072	0.0733	0.057	0.0477	0.5583	0.0781	0.028	0.5722	0.1233	0.0121	0.0004	0.0512	0.0029	0.2063	0.275	0.1769	0.0094	0.1557	0.0739	0.0356	0.0206	0.0004	0.3148	0.3611	0.3112	0.1321	0.5658	0.4222	0.0915	0.1785	0.1326
Sema2b	0.3346	0.4516	0.5752	0.0085	0.0229	0.001	0.4905	0.0766	0.0169	0.0006	0.0273	0.2142	0.0017	0.5201	0.1651	0.0226	0.1315	0.1396	0.0204	0.0453	0.3867	0.0002	0.0036	0.0585	0.0657	0.4229	0.3872	0.2838	0.071	0.3495	0.0732	0.2586	0.0007	0.0881	0.1407	0.078	0.2272	0.5151	0.0041	0.0246	0.4052	0.0039	0.1779	0.3172	0.0249	0.0045	0.0107	0.3021	0.1358
Mpcp2	0.2943	0.3648	0.4602	0.0561	0.3023	0.036	0.3836	0.2986	0.1493	0.0196	0.0009	0.3375	0.0448	0.3739	0.1111	0.3431	0.153	0.1678	0.0846	0.2461	0.2101	0.1462	0.0575	0.3342	0.3115	0.308	0.4885	0.4124	0.2872	0.4744	0.314	0.196	0.0511	0.0714	0.3466	0.2299	0.2774	0.3093	0.0862	0.1838	0.222	0.0499	0.5111	0.2555	0.273	0.0367	0.0355	0.0224	0.1313
CG7071	0.0446	0.4349	0.0724	0.0552	0.4224	0.0031	0.2107	0.502	0.1745	0.0038	0.0016	0.3607	0	0.2642	0.0059	0.0708	0.0059	0.2962	0.2177	0.2266	0.4	0.0359	0.0145	0.5196	0.5209	0.1811	0.1184	0.3293	0.5148	0.1536	0.4805	0.4742	0.0031	0.0017	0.3378	0.0093	0.5177	0.0764	0.1018	0.3515	0.3873	0.0004	0.2299	0.0587	0.0388	0.0013	0.0549	0.1893	0.0048
CG6145	0.4667	0.3818	0.3059	0.0131	0.0007	0.0039	0.334	0.0303	0.0107	0.0057	0.0852	0.1454	0.0392	0.371	0.3163	0.0207	0.2552	0.0545	0.0418	0.0182	0.4104	0.0031	0.0406	0.015	0.0132	0.521	0.3089	0.1261	0.0233	0.2153	0.0197	0.1549	0.0051	0.2583	0.0449	0.26	0.1388	0.274	0.0133	0.0156	0.3087	0.0913	0.1807	0.4458	0.052	0.0655	0.0479	0.3197	0.3327
mRpL28	0.025	0.0738	0.0046	0.3105	0.1004	0.3863	0.132	0.0258	0.3156	0.2759	0.3911	0.0106	0.2699	0.0513	0.0324	0.3669	0.012	0.0826	0.0617	0.1537	0.0302	0.3685	0.3766	0.1142	0.0942	0.261	0.0336	0.0053	0.0335	0.0262	0.0449	0.3389	0.4084	0.0292	0.043	0.0057	0.0534	0.0404	0.0798	0.0324	0.4104	0.1062	0.1847	0.1014	0.2015	0.164	0.2467	0.1387	0.0419
puc	0.0494	0.2613	0.0634	0.1605	0.0321	0.3717	0.2588	0.0032	0.2068	0.1207	0.4705	0.019	0.5266	0.1234	0.1223	0.3206	0.1161	0.0514	0.0159	0.1094	0.0571	0.0524	0.4626	0.089	0.0412	0.5401	0.1222	0.0084	0.0042	0.0409	0.0048	0.1826	0.3378	0.1261	0.0096	0.1268	0.093	0.0188	0.0251	0.0029	0.315	0.2618	0.3225	0.1413	0.5193	0.3413	0.13	0.2213	0.1072
CASK	0.0048	0.0832	0.0004	0.5014	0.1222	0.2076	0.0382	0.1041	0.3505	0.3727	0.1302	0.0506	0.0264	0.0291	0.0002	0.2594	0	0.1262	0.1905	0.2396	0.1404	0.4115	0.1376	0.1112	0.1216	0.0647	0.0025	0.0622	0.1077	0.0137	0.1084	0.3192	0.2108	0.0005	0.0415	0.0004	0.0992	0.0114	0.2862	0.1133	0.2804	0.0091	0.2104	0.014	0.1662	0.0254	0.5436	0.4758	0.0001
CR42195	0.2477	0.2632	0.1149	0.0134	0.0002	0.0624	0.2281	0.0016	0.0256	0.007	0.1705	0.0288	0.1851	0.1473	0.3938	0.1	0.389	0.0459	0.0045	0.03	0.1207	0.0016	0.1447	0.0074	0.0037	0.3922	0.1277	0.0574	0.0015	0.0608	0.0013	0.2351	0.0378	0.4751	0.0278	0.5097	0.0634	0.1051	0.0013	0.0002	0.3378	0.2256	0.3785	0.2696	0.1052	0.1784	0.0046	0.2509	0.4311
robo2	0.1461	0.1815	0.1395	0.1469	0.4198	0.0453	0.2046	0.4872	0.3397	0.0397	0.0085	0.3267	0.0102	0.1602	0.0112	0.2136	0.0146	0.3351	0.1799	0.392	0.3934	0.1026	0.1261	0.3556	0.3975	0.0284	0.1054	0.3441	0.4867	0.2405	0.4259	0.3384	0.0593	0.0118	0.4046	0.0485	0.4235	0.1761	0.1706	0.3916	0.2522	0.0407	0.1658	0.0539	0.2188	0.0432	0.1005	0.1041	0.0198
ReepB	0.1046	0.0115	0.013	0.3626	0.1612	0.1057	0.0368	0.1508	0.5039	0.2367	0.2231	0.0755	0.0468	0.0027	0.03	0.033	0.0025	0.3136	0.4333	0.4509	0.1645	0.0997	0.2498	0.0967	0.1079	0.0322	0.0002	0.0757	0.1562	0.047	0.1412	0.2669	0.1111	0.0384	0.1251	0.0112	0.0419	0.1539	0.4831	0.2502	0.3959	0.1306	0.0466	0.0278	0.0611	0.1363	0.4553	0.4742	0.0314
Naa30A	0.5528	0.076	0.2011	0.3681	0.4364	0.2954	0.3684	0.4481	0.2832	0.4976	0.333	0.1759	0.319	0.081	0.2785	0.1577	0.1884	0.3741	0.4493	0.2555	0.1353	0.1568	0.3889	0.4633	0.462	0.2851	0.0763	0.2859	0.4445	0.428	0.4745	0.0575	0.2672	0.3563	0.5041	0.1022	0.1899	0.4228	0.4555	0.4782	0.1561	0.3159	0.0517	0.4587	0.14	0.4108	0.3827	0.0176	0.3656
CG42381	0.1915	0.0772	0.1037	0.104	0.0608	0.2137	0.053	0.0796	0.0277	0.2528	0.4279	0.2188	0.4569	0.0572	0.3968	0.4602	0.2993	0.0352	0.0431	0.0017	0.4905	0.1679	0.2607	0.0244	0.0187	0.2058	0.0756	0.1022	0.0732	0.0836	0.0666	0.0663	0.2237	0.274	0.068	0.45	0.0321	0.088	0.0721	0.087	0.0069	0.4868	0.3005	0.0078	0.4901	0.4416	0.3095	0.123	0.1407
kar	0.5023	0.1961	0.3044	0.0119	0.3506	0.0148	0.4468	0.2874	0.0492	0.0085	0.0127	0.3896	0.0107	0.2964	0.1251	0.0907	0.0845	0.3261	0.039	0.1584	0.303	0.0117	0.029	0.3541	0.3866	0.2323	0.2179	0.5625	0.28	0.4009	0.3399	0.4793	0.0138	0.0605	0.2945	0.0598	0.5193	0.359	0.0413	0.1103	0.3929	0.0479	0.0484	0.2224	0.0565	0.034	0.012	0.2947	0.1312
Mct1	0.1186	0.0166	0.1062	0.0564	0.017	0.1975	0.0684	0.108	0.0136	0.1373	0.4691	0.093	0.5684	0.0294	0.1922	0.3791	0.1068	0.0624	0.0646	0.0058	0.2375	0.0919	0.2162	0.0042	0.0261	0.0181	0.079	0.1166	0.1015	0.1002	0.0884	0.1499	0.1885	0.1738	0.1119	0.2188	0.0391	0.1118	0.0282	0.0939	0.0311	0.6367	0.3871	0.0488	0.4534	0.3951	0.1729	0.4312	0.1076
RpS5a	0.1371	0.2345	0.0611	0.019	0.0144	0.1141	0.0537	0.013	0.0218	0.0445	0.1246	0.0224	0.3612	0.0684	0.2987	0.2567	0.2994	0.0722	0.0275	0.079	0.0749	0.0723	0.2061	0.0235	0.0239	0.2477	0.1046	0.0919	0.011	0.0314	0.0083	0.4947	0.0907	0.4002	0.0162	0.2962	0.076	0.1132	0.037	0.0138	0.4291	0.4102	0.5113	0.2115	0.195	0.2876	0.0224	0.1436	0.2792
CYLD	0.3655	0.2473	0.5184	0.0127	0.1543	0.0652	0.3381	0.1421	0.0346	0.036	0.1056	0.2208	0.1208	0.4287	0.3373	0.1019	0.2675	0.4466	0.0367	0.1402	0.2673	0.006	0.0676	0.1433	0.1333	0.4992	0.3002	0.3465	0.1384	0.2126	0.1308	0.3828	0.0314	0.2003	0.1694	0.1048	0.3483	0.4844	0.0366	0.1206	0.471	0.1735	0.2176	0.3849	0.0235	0.1137	0.0101	0.3951	0.2984
NTPase	0.0009	0.1575	0.0072	0.18	0.0994	0.413	0.0173	0.055	0.1514	0.3906	0.2738	0.0345	0.1413	0.0793	0.0055	0.4791	0.0152	0.1239	0.0739	0.1004	0.1185	0.275	0.3189	0.0909	0.0837	0.1098	0.0613	0.0629	0.0582	0.001	0.052	0.2213	0.4633	0.0123	0.004	0.017	0.1202	0.0132	0.1102	0.0727	0.2537	0.049	0.547	0.0395	0.3744	0.1253	0.3238	0.4711	0.0093
NKAIN	0.0909	0.0805	0.0467	0.086	0.356	0.0104	0.187	0.3263	0.175	0.0617	0.05	0.1722	0.0034	0.0408	0.009	0.0285	0.0011	0.4861	0.3197	0.272	0.2273	0.0312	0.0632	0.3053	0.3142	0.0815	0.0259	0.1799	0.3332	0.1534	0.3109	0.3162	0.0127	0.0075	0.2919	0.0032	0.2134	0.1523	0.2364	0.4692	0.4599	0.0257	0.0219	0.0722	0.0177	0.0292	0.1726	0.4803	0.0145
UBL3	0.4685	0.3911	0.3324	0.2643	0.3516	0.3553	0.1798	0.2109	0.1151	0.3223	0.3151	0.1948	0.4134	0.3835	0.451	0.4869	0.4434	0.3479	0.3707	0.1388	0.0539	0.4683	0.222	0.3646	0.4206	0.1188	0.4573	0.1661	0.2124	0.4626	0.2711	0.1685	0.323	0.4916	0.3185	0.2629	0.3917	0.3756	0.4056	0.1846	0.0788	0.3707	0.281	0.1253	0.2553	0.47	0.3564	0.0077	0.3668
Dad	0.085	0.207	0.2231	0.3355	0.4551	0.3077	0.1886	0.4803	0.3737	0.3254	0.4564	0.1688	0.1381	0.4537	0.0646	0.3384	0.1862	0.1127	0.3419	0.1814	0.2001	0.4656	0.3155	0.4445	0.5481	0.1403	0.4396	0.4394	0.4895	0.1509	0.4688	0.2094	0.4186	0.2191	0.2535	0.1856	0.3195	0.3494	0.2652	0.4901	0.06	0.1631	0.3747	0.4555	0.2086	0.3155	0.346	0.3912	0.2057
PNUTS	0.0296	0.0209	0.0116	0.2253	0.1114	0.4376	0.0016	0.1243	0.1114	0.4342	0.2574	0.0745	0.1541	0.0055	0.0166	0.3618	0.008	0.1179	0.116	0.0779	0.2059	0.4313	0.5307	0.0447	0.1004	0.0013	0.0035	0.1125	0.1225	0.0246	0.1199	0.2194	0.4596	0.0146	0.0797	0.0153	0.0721	0.0603	0.1233	0.1224	0.1159	0.1401	0.1912	0.0046	0.3011	0.1952	0.4049	0.4239	0.0051
Atg9	0.0329	0.1858	0.0141	0.2348	0.1188	0.1081	0.2303	0.1192	0.4184	0.163	0.0065	0.1505	0.034	0.1427	0.0088	0.3555	0.0084	0.1989	0.4357	0.3031	0.3454	0.3735	0.0522	0.1437	0.1206	0.2209	0.0166	0.0449	0.1224	0.0658	0.1156	0.0779	0.1113	0.0005	0.0802	0.0153	0.1413	0.0008	0.4933	0.1838	0.0903	0.007	0.4737	0.0117	0.1567	0.0069	0.1499	0.2269	0.0028
CG7888	0.2299	0.5047	0.4081	0.0171	0.0916	0.0016	0.4362	0.1235	0.0508	0.0002	0.008	0.2507	0.0006	0.4823	0.1098	0.036	0.0994	0.1099	0.0313	0.0842	0.3285	0.0047	0.0092	0.1431	0.1376	0.2845	0.3983	0.3105	0.1162	0.4504	0.1371	0.3618	0.0013	0.0588	0.2299	0.0897	0.2391	0.4294	0.0081	0.0508	0.4993	0.0036	0.2446	0.2509	0.0523	0.0054	0.0108	0.137	0.0893
dop	0.0222	0.1814	0.0372	0.0373	0.0219	0.3066	0.0511	0.004	0.0443	0.1274	0.4539	0.0053	0.4542	0.0966	0.0838	0.3775	0.0719	0.1094	0.0189	0.0717	0.0819	0.0513	0.3466	0.0325	0.0193	0.169	0.1189	0.0607	0.0049	0.0051	0.0016	0.2335	0.2508	0.1077	0.003	0.1085	0.0969	0.0478	0.0329	0.0096	0.3545	0.2559	0.5377	0.1084	0.4388	0.3659	0.0346	0.2899	0.0667
Tusp	0.2009	0.2325	0.2396	0.0246	0.3091	0.0022	0.3121	0.3637	0.0633	0.0048	0.0301	0.4884	0.0007	0.2244	0.0705	0.013	0.0381	0.3049	0.0875	0.1175	0.468	0.0016	0.012	0.3682	0.3718	0.2038	0.1906	0.551	0.3516	0.4005	0.365	0.2538	0.0024	0.0302	0.4335	0.0151	0.5102	0.3412	0.0359	0.2057	0.4426	0.0031	0.0698	0.1839	0.013	0.0053	0.0365	0.4089	0.0496
MagR	0.0887	0.2363	0.0742	0.0223	0.0099	0.1866	0.1275	0.0001	0.0579	0.0253	0.1649	0.0091	0.3349	0.1063	0.2475	0.3162	0.2326	0.0673	0.0021	0.0937	0.0264	0.0354	0.2616	0.0313	0.0117	0.3888	0.1233	0.0479	0.0004	0.0242	0	0.4714	0.1418	0.345	0.0093	0.2942	0.061	0.0946	0.0094	0.0003	0.4556	0.5601	0.4885	0.2208	0.2914	0.326	0.0031	0.1251	0.2723
Vha100-1	0.0046	0.374	0.0202	0.3323	0.1602	0.2758	0.0283	0.1087	0.1817	0.2628	0.0961	0.1815	0.0784	0.1477	0.045	0.3112	0.0588	0.3162	0.2319	0.1486	0.3516	0.4345	0.2162	0.0926	0.0766	0.1551	0.0654	0.1199	0.1077	0.0104	0.0828	0.17	0.3299	0.0288	0.0243	0.1271	0.1701	0.0154	0.3971	0.1642	0.1056	0.0602	0.3433	0.0033	0.3727	0.0579	0.4342	0.069	0.0064
CG1636	0.0726	0.4013	0.1126	0.0514	0.3616	0.0051	0.3349	0.4273	0.0823	0.0142	0.0532	0.3661	0.0072	0.4204	0.0176	0.128	0.0334	0.267	0.1592	0.0651	0.2385	0.0232	0.0043	0.3204	0.3679	0.3436	0.2259	0.4758	0.4103	0.247	0.4107	0.2641	0.0024	0.0162	0.4355	0.0051	0.3244	0.1358	0.0489	0.3467	0.2032	0.0026	0.2725	0.2815	0.0423	0.0056	0.0777	0.3769	0.0339
mRpS9	0.2406	0.0037	0.0366	0.3073	0.1144	0.2632	0.2127	0.1188	0.4465	0.4469	0.2226	0.0968	0.1738	0.0134	0.0844	0.2002	0.0223	0.0648	0.3	0.2646	0.2138	0.2831	0.3055	0.1088	0.1173	0.1446	0.0009	0.0463	0.1187	0.124	0.125	0.4042	0.23	0.0464	0.1225	0.0168	0.03	0.0834	0.2832	0.1437	0.2297	0.2378	0.0645	0.0464	0.0958	0.2036	0.3695	0.2922	0.0595
slgA	0.1116	0.2463	0.0674	0.0928	0.345	0.0695	0.2641	0.3464	0.263	0.0453	0.0023	0.4474	0.0253	0.2902	0.04	0.2313	0.0412	0.3086	0.2841	0.4548	0.4152	0.1458	0.0212	0.4071	0.319	0.3051	0.0452	0.1933	0.3535	0.2436	0.3074	0.1321	0.0405	0.0017	0.2477	0.0233	0.3707	0.0203	0.2051	0.4812	0.1179	0.0053	0.4913	0.0197	0.0481	0.0002	0.0278	0.2113	0.0082
RhoGEF64C	0.3223	0.2757	0.315	0.0136	0.2281	0.0011	0.5153	0.3279	0.0148	0.0141	0.0654	0.4839	0.0051	0.2849	0.1217	0.0104	0.0602	0.2681	0.1019	0.0523	0.3547	0.0008	0.0143	0.2692	0.3312	0.3573	0.2469	0.4787	0.3193	0.4974	0.3329	0.1548	0.0013	0.0831	0.3323	0.03	0.481	0.4431	0.0554	0.1926	0.336	0.0212	0.0151	0.3161	0.0096	0.0251	0.0617	0.4394	0.1312
CG8818	0.3428	0.4363	0.1733	0.4638	0.1578	0.4564	0.3328	0.0666	0.3645	0.1316	0.3183	0.074	0.365	0.3762	0.3692	0.3942	0.3275	0.0727	0.0766	0.4618	0.0238	0.2221	0.3303	0.2655	0.1877	0.1227	0.2422	0.0491	0.0653	0.2047	0.1187	0.4774	0.4827	0.3676	0.1269	0.2125	0.1663	0.1232	0.1052	0.0284	0.326	0.4269	0.4462	0.449	0.3476	0.4686	0.2071	0.0107	0.453
Coq8	0.1397	0.0862	0.0653	0.4173	0.0771	0.4901	0.3217	0.0188	0.4306	0.1577	0.4918	0.0338	0.5016	0.0833	0.173	0.4	0.0919	0.0176	0.0315	0.1801	0.0387	0.2738	0.415	0.1108	0.0712	0.4349	0.0685	0.0007	0.0198	0.0868	0.0356	0.3449	0.4642	0.1446	0.0743	0.0757	0.025	0.0586	0.0387	0.014	0.3289	0.355	0.2812	0.1521	0.2008	0.3446	0.2319	0.1109	0.1649
CG17734	0.026	0.1181	0.0651	0.0122	0.0207	0.252	0.0166	0.0118	0.0054	0.1412	0.4819	0.0463	0.4762	0.0942	0.141	0.409	0.0956	0.0773	0.0082	0.0212	0.1629	0.0478	0.2821	0.0167	0.0048	0.1311	0.1185	0.0906	0.0102	0.0099	0.0032	0.1952	0.2282	0.1047	0.0019	0.1148	0.08	0.0677	0.0269	0.0183	0.1474	0.3453	0.6001	0.0681	0.5023	0.3653	0.0564	0.41	0.0737
lute	0.4692	0.4766	0.5172	0.1993	0.289	0.3349	0.4253	0.287	0.2594	0.1524	0.3362	0.1466	0.3154	0.379	0.4548	0.2998	0.4615	0.3835	0.1605	0.3531	0.2819	0.1231	0.1218	0.1607	0.2255	0.2597	0.3762	0.3466	0.2943	0.3079	0.2699	0.4703	0.1934	0.3553	0.4295	0.2477	0.2904	0.4095	0.0901	0.2621	0.4074	0.2501	0.1925	0.3714	0.1492	0.1703	0.088	0.3305	0.3441
p130CAS	0.3343	0.266	0.4155	0.0052	0.0256	0.0017	0.338	0.067	0.0198	0.0001	0.0124	0.1934	0.0094	0.307	0.1415	0.1116	0.1822	0.0405	0.01	0.0199	0.3178	0.01	0.0064	0.0483	0.0441	0.436	0.3869	0.1981	0.055	0.3122	0.074	0.343	0.0011	0.1037	0.1426	0.1428	0.0802	0.4835	0.0029	0.0247	0.3474	0.0148	0.3452	0.4756	0.0887	0.0134	0.0097	0.2137	0.1797
CG7148	0.1424	0.3866	0.1091	0.2146	0.0428	0.3789	0.3176	0.0287	0.1559	0.2249	0.275	0.1059	0.4789	0.3101	0.231	0.2579	0.2415	0.1184	0.043	0.058	0.2702	0.0518	0.4608	0.0421	0.0234	0.4128	0.1916	0.0341	0.0327	0.0665	0.0243	0.0352	0.3023	0.2092	0.0492	0.4533	0.0831	0.0359	0.0435	0.028	0.0497	0.386	0.2937	0.1018	0.3137	0.3808	0.2476	0.1752	0.2
CG7300	0.3372	0.1775	0.5156	0.4363	0.1949	0.2262	0.3681	0.3449	0.2797	0.3144	0.2208	0.4075	0.2603	0.4403	0.3758	0.2465	0.4335	0.0658	0.2743	0.0298	0.1387	0.1671	0.3325	0.2143	0.1961	0.4923	0.3557	0.2499	0.341	0.436	0.3294	0.0001	0.2705	0.419	0.4479	0.3122	0.1684	0.2226	0.1527	0.3149	0.0012	0.3385	0.2456	0.126	0.4081	0.4825	0.3421	0.1009	0.4596
ND-75	0.071	0.1622	0.0883	0.0625	0.0241	0.2503	0.1782	0.0002	0.0999	0.0492	0.3774	0.03	0.3768	0.1014	0.2136	0.4142	0.1576	0.0252	0.0001	0.0426	0.0652	0.029	0.3287	0.0493	0.007	0.4865	0.126	0.012	0.0003	0.0457	0.0004	0.2201	0.2329	0.2131	0.017	0.2151	0.0357	0.0663	0.0032	0.0001	0.2289	0.4623	0.6042	0.1203	0.5416	0.4905	0.0296	0.2112	0.1432
Rbcn-3B	0.0059	0.1172	0.0013	0.3483	0.1224	0.0843	0.0512	0.1049	0.4811	0.1826	0.0521	0.0689	0.0086	0.0291	0.0012	0.1526	0.0003	0.2031	0.3435	0.3482	0.1489	0.2685	0.064	0.1107	0.1206	0.104	0.0022	0.061	0.1102	0.0168	0.1104	0.3646	0.0969	0.0007	0.0452	0.0005	0.0949	0.0081	0.4748	0.1278	0.2563	0.003	0.2456	0.0063	0.1042	0.0128	0.3154	0.4106	0.0001
ND-B18	0.1045	0.1237	0.1094	0.0408	0.0074	0.1711	0.2103	0.0016	0.0621	0.0243	0.3343	0.0523	0.2987	0.1078	0.2737	0.3498	0.2027	0.0086	0.0009	0.0194	0.1234	0.012	0.2413	0.038	0.006	0.4852	0.1264	0.0248	0.0006	0.0817	0.0026	0.1857	0.1723	0.2758	0.0283	0.2764	0.0312	0.0842	0.0026	0.0001	0.1739	0.6392	0.3354	0.1229	0.4893	0.3745	0.03	0.1949	0.1909
Ubr1	0.1063	0.0351	0.0073	0.2666	0.1199	0.1211	0.154	0.1096	0.3452	0.2774	0.1953	0.0516	0.0586	0.0164	0.0219	0.1316	0.0065	0.1728	0.4197	0.4829	0.1164	0.1638	0.1294	0.1207	0.1217	0.1408	0	0.0493	0.1113	0.0654	0.1192	0.3748	0.1036	0.0188	0.0864	0.0016	0.0601	0.0529	0.4906	0.1649	0.493	0.0848	0.0666	0.0699	0.0504	0.0963	0.3492	0.1945	0.0247
CG13907	0.148	0.1498	0.516	0.0163	0.1296	0.0021	0.4632	0.1639	0.032	0.0013	0.0456	0.2839	0.0181	0.2668	0.0911	0.1264	0.1581	0.0841	0.0461	0.0126	0.4975	0.0104	0.0053	0.1362	0.1306	0.5004	0.3555	0.2033	0.1571	0.4247	0.1597	0.2339	0.0016	0.0892	0.2384	0.0824	0.1348	0.4287	0.0065	0.1476	0.1686	0.015	0.4012	0.4623	0.0753	0.0199	0.0298	0.4051	0.1269
COX8	0.0584	0.1496	0.0857	0.0247	0.0132	0.2212	0.1053	0.0001	0.0421	0.0599	0.3705	0.0284	0.4056	0.1048	0.1947	0.3913	0.1349	0.0385	0.0002	0.0346	0.0903	0.0211	0.2898	0.0327	0.0042	0.3609	0.1267	0.034	0	0.0301	0.0001	0.2076	0.2062	0.1888	0.006	0.1827	0.0553	0.0677	0.0064	0	0.2341	0.4348	0.6292	0.1166	0.492	0.472	0.0192	0.2285	0.1141
wmd	0.1498	0.1537	0.3839	0.0963	0.1289	0.0312	0.4093	0.1695	0.1553	0.006	0.041	0.1762	0.0562	0.2327	0.2519	0.0916	0.2989	0.1454	0.1565	0.1863	0.3159	0.0653	0.0514	0.1515	0.1612	0.4597	0.2935	0.1951	0.1648	0.4223	0.1702	0.4988	0.0278	0.1544	0.2472	0.274	0.1633	0.4495	0.0373	0.1551	0.4207	0.0622	0.3193	0.3166	0.1058	0.031	0.0463	0.0807	0.1414
RpL3	0.4827	0.465	0.5244	0.1419	0.1222	0.1053	0.3789	0.1912	0.1082	0.0855	0.4383	0.3254	0.1175	0.4204	0.375	0.0795	0.3381	0.2308	0.0794	0.0533	0.4201	0.011	0.1201	0.1168	0.1398	0.4889	0.4298	0.2824	0.19	0.3771	0.1766	0.0465	0.0784	0.3617	0.3071	0.1291	0.2636	0.3148	0.0261	0.1297	0.0816	0.1945	0.2364	0.4289	0.0881	0.1964	0.169	0.1731	0.3559
CG8993	0.0583	0.0721	0.0326	0.137	0.0359	0.4105	0.0769	0.0486	0.133	0.1775	0.4578	0.0009	0.4009	0.0385	0.0385	0.419	0.031	0.118	0.0767	0.1095	0.1255	0.1946	0.3206	0.0396	0.0675	0.036	0.0674	0.0566	0.0521	0.0266	0.046	0.2495	0.3749	0.0667	0.0527	0.0387	0.0799	0.0866	0.0599	0.0496	0.3552	0.3145	0.1774	0.117	0.5423	0.3668	0.0961	0.1709	0.0727
Pex1	0.3942	0.314	0.1694	0.4892	0.0377	0.3534	0.3174	0.04	0.4699	0.1736	0.3475	0.1281	0.332	0.3827	0.3281	0.1705	0.3265	0.0168	0.1066	0.1712	0.2114	0.1025	0.3664	0.1815	0.0986	0.2001	0.1753	0.0094	0.0426	0.2142	0.0441	0.0458	0.3928	0.2369	0.1	0.2612	0.1324	0.0232	0.0781	0.0275	0.182	0.438	0.2528	0.2737	0.4462	0.4165	0.4308	0.2329	0.3431
CG31637	0.3866	0.2933	0.471	0.0439	0.1248	0.0185	0.4032	0.1423	0.0711	0.0337	0.2296	0.3621	0.053	0.267	0.2301	0.0064	0.1321	0.1193	0.0954	0.0499	0.4725	0	0.1663	0.1821	0.1468	0.1755	0.4375	0.2206	0.1426	0.3739	0.1387	0.0382	0.0189	0.251	0.162	0.152	0.3053	0.2421	0.0565	0.1269	0.2161	0.1679	0.0343	0.4738	0.0361	0.1691	0.1743	0.5071	0.2644
TBPH	0.0107	0.0218	0.0048	0.4082	0.122	0.2803	0.0165	0.1105	0.2446	0.462	0.1848	0.0816	0.0712	0.0028	0.0227	0.1895	0.0029	0.0989	0.118	0.0977	0.1843	0.4392	0.343	0.0779	0.0956	0.0247	0.0027	0.0721	0.1119	0.0252	0.1128	0.2657	0.2766	0.0061	0.0808	0.0092	0.0423	0.0403	0.1701	0.1184	0.0899	0.0466	0.1804	0.0014	0.1648	0.071	0.4608	0.379	0.0009
CG3223	0.009	0.2682	0.009	0.4135	0.1196	0.1125	0.1134	0.0865	0.4347	0.2363	0.03	0.0763	0.0346	0.1027	0.0073	0.2914	0.0051	0.2144	0.2521	0.2793	0.1669	0.4726	0.0839	0.1055	0.102	0.1983	0.0302	0.0431	0.0896	0.0151	0.0859	0.1661	0.1472	0.0015	0.037	0.0153	0.1005	0.0029	0.3918	0.0947	0.1502	0.0209	0.446	0.0092	0.1867	0.0217	0.3498	0.2228	0.0019
CG42837	0.1226	0.1723	0.1144	0.0063	0.0007	0.118	0.1535	0.005	0.0072	0.0172	0.291	0.0382	0.2682	0.1084	0.2825	0.2131	0.2503	0.043	0.0034	0.015	0.1591	0.0016	0.1912	0.0027	0.0014	0.2853	0.1278	0.071	0.0045	0.0556	0.0019	0.184	0.0745	0.3277	0.023	0.4054	0.0565	0.0987	0.002	0.0024	0.2068	0.3048	0.3405	0.1255	0.1828	0.2615	0.007	0.3321	0.2439
CG18809	0.0192	0.1274	0.0173	0.1854	0.3729	0.0139	0.0557	0.3219	0.3396	0.039	0.0399	0.2238	0.0008	0.0421	0.0071	0.0226	0.002	0.4822	0.3539	0.3876	0.3066	0.0366	0.0671	0.2812	0.2884	0.063	0.0119	0.2151	0.3263	0.0638	0.2897	0.3754	0.0194	0.0028	0.2131	0.0082	0.237	0.1006	0.2072	0.5008	0.3679	0.0018	0.137	0.0165	0.0265	0.0029	0.1753	0.284	0.0016
ko	0.2477	0.2911	0.3168	0.0282	0.222	0.0041	0.2967	0.2416	0.0825	0.0019	0.0316	0.3844	0.0006	0.301	0.0854	0.0245	0.0646	0.1793	0.039	0.0987	0.3846	0.0013	0.0202	0.2976	0.2766	0.1543	0.275	0.4303	0.2347	0.5339	0.2659	0.2612	0.0034	0.0505	0.351	0.0408	0.3992	0.4227	0.013	0.0893	0.427	0.01	0.0847	0.2057	0.032	0.0099	0.0294	0.2887	0.0691
CG4577	0.0427	0.4638	0.0539	0.0615	0.5034	0.0018	0.2399	0.4283	0.161	0.0082	0.0028	0.2735	0.0002	0.2709	0.0024	0.092	0.0028	0.2784	0.2369	0.1923	0.3096	0.049	0.0146	0.4834	0.4496	0.1882	0.1246	0.2976	0.4461	0.119	0.3988	0.481	0.0049	0.0019	0.3221	0.0067	0.5044	0.0678	0.1245	0.4008	0.4645	0.0004	0.1942	0.0838	0.0545	0.0023	0.0863	0.2471	0.0064
POLDIP2	0.0033	0.1	0.0024	0.3643	0.1225	0.2755	0.0189	0.0584	0.2833	0.4753	0.2358	0.0496	0.0781	0.027	0.0106	0.2481	0.003	0.1068	0.068	0.1429	0.0832	0.4667	0.2303	0.1002	0.0897	0.1428	0.0167	0.036	0.0623	0.0044	0.0664	0.3063	0.2937	0.0071	0.0245	0.0033	0.0677	0.0159	0.1385	0.0775	0.2399	0.0364	0.2979	0.0202	0.1578	0.0383	0.3734	0.4401	0.0038
cdc14	0.0083	0.0905	0.0005	0.3282	0.1214	0.0977	0.1232	0.0897	0.4441	0.3269	0.1025	0.0229	0.0192	0.0299	0.0003	0.1829	0	0.1727	0.2355	0.3947	0.0701	0.3328	0.096	0.1112	0.1169	0.1097	0.0064	0.0247	0.0986	0.0182	0.1009	0.4485	0.1278	0.0012	0.0659	0.0007	0.0737	0.0158	0.3193	0.1019	0.3672	0.0057	0.0907	0.0345	0.1378	0.0292	0.4609	0.3943	0.0018
CG31145	0.2436	0.3225	0.308	0.0124	0.2433	0.0013	0.4044	0.282	0.0433	0.0019	0.0111	0.3883	0.0004	0.3329	0.073	0.0421	0.0595	0.235	0.0324	0.0953	0.3988	0.0031	0.0026	0.2749	0.3121	0.2638	0.2592	0.5492	0.2679	0.5236	0.3118	0.3549	0.0005	0.0257	0.3957	0.0261	0.4102	0.3365	0.0132	0.1069	0.4723	0.0003	0.1412	0.2075	0.0239	0.0016	0.0123	0.3084	0.0607
CrebB	0.0331	0.1707	0.041	0.1759	0.0423	0.4677	0.2037	0.0142	0.1749	0.2007	0.3362	0.0114	0.3988	0.1179	0.0476	0.3761	0.0426	0.0999	0.0385	0.0912	0.0986	0.0795	0.496	0.0673	0.0522	0.2425	0.1149	0.0152	0.0199	0.0261	0.0167	0.1765	0.3872	0.0481	0.023	0.0713	0.0959	0.0202	0.0395	0.0172	0.2103	0.1763	0.4776	0.1026	0.5462	0.2638	0.1662	0.3573	0.0542
LpR1	0.0051	0.184	0.008	0.5096	0.1203	0.1324	0.059	0.0787	0.3686	0.3039	0.0651	0.06	0.0318	0.0448	0.0102	0.1994	0.0029	0.206	0.1723	0.2379	0.1319	0.4655	0.1356	0.0888	0.0885	0.1394	0.0281	0.0448	0.0831	0.0082	0.079	0.2655	0.1873	0.0036	0.0374	0.0233	0.0757	0.007	0.2908	0.0946	0.1523	0.0259	0.3126	0.008	0.1872	0.0295	0.4665	0.2303	0.0027
CG14777	0.405	0.4497	0.3458	0.0169	0.0018	0.0329	0.4256	0.001	0.0501	0.0052	0.0971	0.1067	0.0414	0.4488	0.2968	0.0923	0.2798	0.0565	0.0039	0.042	0.1835	0.0005	0.1072	0.0347	0.0031	0.2792	0.482	0.0553	0.0011	0.1705	0.0003	0.2118	0.0196	0.2635	0.0332	0.1916	0.0925	0.2495	0.0038	0.0005	0.2968	0.1788	0.1599	0.5031	0.0998	0.1409	0.0239	0.3298	0.3183
ND-ACP	0.013	0.1052	0.0268	0.1723	0.0893	0.431	0.0472	0.0023	0.1502	0.1876	0.4019	0.038	0.4114	0.0788	0.0718	0.509	0.0495	0.0547	0.0084	0.0723	0.1294	0.1939	0.6402	0.0794	0.0266	0.1916	0.085	0.0123	0.0045	0.0115	0.0064	0.2215	0.4558	0.0557	0.0093	0.0527	0.0393	0.0307	0.0381	0.0111	0.1187	0.2271	0.5184	0.0664	0.3561	0.1804	0.1722	0.2612	0.0438
CG44242	0.0163	0.144	0.0477	0.0982	0.0552	0.3731	0.1016	0.0007	0.1127	0.1543	0.4616	0.0267	0.4515	0.1035	0.1179	0.4598	0.0771	0.0543	0.0056	0.057	0.0796	0.079	0.582	0.0693	0.0141	0.3356	0.1167	0.0142	0.0017	0.014	0.0024	0.203	0.3405	0.0836	0.0032	0.0893	0.0659	0.0311	0.0146	0.0039	0.1804	0.2357	0.5737	0.0915	0.3893	0.269	0.0905	0.2889	0.0687
ND-B14.5B	0.0759	0.1708	0.0933	0.0306	0.0087	0.2006	0.1749	0	0.0626	0.0368	0.3468	0.0298	0.3522	0.112	0.2201	0.3458	0.1712	0.0287	0.0006	0.0377	0.0823	0.0132	0.287	0.0437	0.0071	0.4501	0.1273	0.0257	0.0001	0.048	0.0001	0.2077	0.1913	0.2311	0.0118	0.2279	0.0539	0.069	0.0035	0	0.2587	0.5091	0.3523	0.1251	0.4521	0.5487	0.0201	0.1943	0.1555
Dredd	0.0088	0.3127	0.0205	0.3096	0.0945	0.3797	0.0509	0.0807	0.1782	0.3942	0.1125	0.1026	0.1148	0.1383	0.0354	0.482	0.0543	0.122	0.1691	0.0986	0.2292	0.3248	0.1812	0.0945	0.0875	0.2352	0.0563	0.0811	0.0801	0.0176	0.0732	0.0893	0.3944	0.0146	0.0116	0.0699	0.1169	0.0035	0.2869	0.0853	0.111	0.0517	0.2096	0.0078	0.3603	0.0509	0.4501	0.2251	0.007
Usp47	0.0019	0.3981	0.0023	0.3648	0.1069	0.1845	0.0224	0.0696	0.3425	0.3271	0.1901	0.0299	0.0435	0.0918	0.0046	0.3579	0.0088	0.3199	0.2691	0.4277	0.0542	0.4785	0.1099	0.0969	0.1021	0.1766	0.0312	0.0711	0.0697	0.0019	0.0666	0.4772	0.2274	0.0108	0.008	0.0056	0.1436	0.0141	0.4568	0.0849	0.4758	0.0333	0.3931	0.0463	0.3138	0.0523	0.4564	0.4558	0.0057
jagn	0.2061	0.5077	0.1536	0.0239	0.0101	0.0599	0.1402	0.0345	0.0155	0.039	0.0723	0.0125	0.2092	0.1846	0.4216	0.0787	0.483	0.2985	0.0872	0.1863	0.1401	0.0549	0.0487	0.0014	0.031	0.2234	0.2655	0.1024	0.0304	0.0585	0.0153	0.4612	0.0531	0.3856	0.0366	0.4885	0.1536	0.3079	0.0563	0.0294	0.3191	0.1987	0.5599	0.4428	0.0868	0.089	0.0276	0.1798	0.4874
larp	0.0126	0.1577	0.0048	0.3489	0.1129	0.1437	0.1946	0.0889	0.5114	0.3496	0.0622	0.0357	0.0375	0.0781	0.001	0.3764	0.0017	0.1616	0.2388	0.3272	0.1145	0.5199	0.0852	0.1132	0.1206	0.1646	0.0214	0.0258	0.0986	0.0287	0.0991	0.2147	0.179	0.0012	0.0618	0.0026	0.104	0.003	0.2902	0.0978	0.2479	0.0093	0.2748	0.0348	0.2075	0.0258	0.4003	0.4863	0.0035
Efr	0.4867	0.0734	0.12	0.1095	0.0073	0.0928	0.3012	0.0777	0.0531	0.0651	0.499	0.1414	0.2149	0.1081	0.4391	0.1476	0.3639	0.0119	0.0455	0.002	0.4195	0.0215	0.1864	0.0277	0.0281	0.3382	0.1146	0.081	0.0719	0.155	0.0668	0.0204	0.0942	0.3664	0.1081	0.4918	0.046	0.0977	0.0153	0.0511	0.0092	0.2332	0.3125	0.0975	0.2751	0.2704	0.2367	0.4062	0.3454
mle	0.0167	0.0669	0.0089	0.5431	0.1216	0.2552	0.134	0.0607	0.4187	0.4774	0.2029	0.0761	0.1298	0.0551	0.0346	0.2256	0.009	0.0549	0.086	0.1552	0.1051	0.5142	0.1657	0.1228	0.1107	0.3233	0.0123	0.0102	0.0685	0.0451	0.0852	0.2444	0.2366	0.0067	0.0613	0.0043	0.05	0.0071	0.1389	0.0734	0.1629	0.0263	0.33	0.0265	0.1312	0.0482	0.478	0.3218	0.0093
PyK	0.0844	0.1021	0.0833	0.2369	0.0619	0.4025	0.2768	0.0033	0.2699	0.1086	0.4867	0.0432	0.5563	0.0975	0.1864	0.4799	0.1064	0.0137	0.0062	0.0686	0.0701	0.1246	0.5402	0.0893	0.0326	0.531	0.1043	0.0008	0.0055	0.0759	0.0107	0.2046	0.3842	0.1458	0.0566	0.1317	0.0183	0.0501	0.0128	0.0041	0.1557	0.3762	0.459	0.1099	0.2719	0.3655	0.1574	0.1975	0.1251
CG14818	0.0719	0.0544	0.0529	0.0779	0.0608	0.3154	0.0329	0.0208	0.0962	0.131	0.341	0.0314	0.4748	0.0268	0.1687	0.4059	0.0904	0.0478	0.0248	0.0722	0.0726	0.2501	0.3318	0.0559	0.0322	0.2036	0.0535	0.0644	0.0205	0.032	0.0242	0.4152	0.3166	0.1597	0.0299	0.0681	0.0304	0.0998	0.0427	0.0244	0.3914	0.3804	0.3196	0.0988	0.3069	0.4328	0.0673	0.1421	0.0877
CG7120	0.0631	0.3299	0.1642	0.0782	0.4011	0.013	0.3788	0.4252	0.144	0.008	0.0106	0.3616	0.0025	0.4975	0.0079	0.312	0.031	0.1838	0.1011	0.1009	0.4038	0.0901	0.0099	0.3207	0.3673	0.2542	0.2485	0.4377	0.4019	0.2482	0.4576	0.4865	0.0174	0.0109	0.3664	0.0145	0.2364	0.1073	0.0498	0.2842	0.3539	0.0019	0.3518	0.2418	0.1799	0.0134	0.061	0.3336	0.029
mys	0.1396	0.1193	0.0774	0.2189	0.5493	0.0466	0.081	0.5642	0.3433	0.0642	0.1881	0.2185	0.0211	0.0614	0.0377	0.0287	0.0095	0.246	0.2365	0.2176	0.3271	0.0062	0.1791	0.4049	0.4979	0.0352	0.0332	0.459	0.5695	0.1621	0.5193	0.1085	0.053	0.0778	0.4789	0.0259	0.3798	0.4138	0.1665	0.2888	0.3207	0.1297	0.055	0.1501	0.0798	0.1377	0.3314	0.467	0.0743
CG5273	0.032	0.0829	0.0455	0.1265	0.0634	0.3543	0.0145	0.1119	0.0377	0.398	0.2624	0.1147	0.2933	0.0639	0.085	0.4347	0.0744	0.0792	0.1144	0.0205	0.2736	0.2279	0.429	0.0556	0.076	0.0578	0.0505	0.1192	0.1086	0.0523	0.1022	0.0759	0.3634	0.0484	0.0471	0.1185	0.1045	0.0324	0.1311	0.1104	0.0347	0.2288	0.3118	0.0024	0.5401	0.2317	0.4349	0.2363	0.0225
klu	0.0255	0.3601	0.0952	0.4278	0.6249	0.0946	0.0321	0.4424	0.4542	0.1233	0.3058	0.3895	0.0436	0.1528	0.1318	0.0066	0.0842	0.5188	0.451	0.3947	0.2068	0.0735	0.13	0.5149	0.4999	0.2704	0.1462	0.4438	0.4499	0.091	0.4688	0.1571	0.083	0.1027	0.2421	0.0596	0.3767	0.2724	0.2531	0.5072	0.3987	0.0371	0.3109	0.0948	0.0255	0.0432	0.4059	0.4619	0.0424
drpr	0.0063	0.5002	0.0057	0.4692	0.1106	0.1436	0.0854	0.0906	0.3889	0.2192	0.0736	0.0545	0.0355	0.2009	0.0036	0.4917	0.0127	0.435	0.4249	0.4759	0.1369	0.4949	0.0844	0.133	0.1197	0.1787	0.0439	0.0745	0.0922	0.007	0.0794	0.31	0.1904	0.0053	0.0191	0.0138	0.2478	0.0057	0.4419	0.1415	0.4365	0.0227	0.4883	0.0495	0.4063	0.0414	0.3983	0.3674	0.0053
vig	0.189	0.2994	0.1101	0.0016	0.0042	0.051	0.106	0.0078	0.0026	0.0141	0.1765	0.0578	0.2035	0.1475	0.4681	0.1656	0.4465	0.0534	0.002	0.0081	0.1618	0.0024	0.1205	0.0051	0.0006	0.3667	0.1594	0.0804	0.0046	0.0424	0.0019	0.1984	0.0286	0.4903	0.0173	0.3873	0.0566	0.1184	0.0037	0.0056	0.2069	0.2708	0.2612	0.1779	0.101	0.2412	0.0095	0.4911	0.385
Dlg5	0.009	0.1022	0.0009	0.372	0.122	0.1197	0.0875	0.093	0.4698	0.3063	0.0712	0.0561	0.0204	0.0299	0.0026	0.1842	0	0.1308	0.2085	0.2849	0.1163	0.3704	0.0806	0.1106	0.1172	0.1299	0.0049	0.0362	0.0985	0.016	0.1008	0.3033	0.1416	0.0002	0.0485	0.0001	0.082	0.0065	0.3183	0.1049	0.2129	0.0078	0.2069	0.0111	0.135	0.0195	0.3999	0.4407	0.0002
ari-1	0.2851	0.1774	0.255	0.0815	0.5116	0.057	0.2945	0.491	0.1796	0.0295	0.0649	0.4518	0.0152	0.2333	0.059	0.1634	0.0616	0.3944	0.0632	0.1979	0.3686	0.0224	0.0728	0.5209	0.5026	0.1243	0.1359	0.4569	0.4879	0.4185	0.5038	0.3914	0.0363	0.0339	0.4795	0.0227	0.5202	0.3108	0.0532	0.3197	0.4296	0.0376	0.1506	0.1738	0.0921	0.0477	0.0461	0.4903	0.0598
CG33199	0.493	0.3192	0.5507	0.0206	0.0854	0.0226	0.5237	0.0629	0.0854	0.0018	0.0172	0.1771	0.0119	0.4153	0.1762	0.096	0.1582	0.1598	0.0091	0.1382	0.1334	0.007	0.0491	0.1738	0.1133	0.206	0.3559	0.2661	0.0559	0.3091	0.0883	0.458	0.0177	0.1026	0.138	0.1318	0.2671	0.5091	0.0101	0.0136	0.4039	0.0592	0.2225	0.2475	0.0942	0.0347	0.0077	0.1491	0.1554
CG4080	0.4334	0.0678	0.1874	0.0775	0.0058	0.0937	0.2229	0.1221	0.0781	0.0581	0.1243	0.0563	0.2397	0.0648	0.4219	0.1871	0.3658	0.1473	0.1735	0.1536	0.2553	0.157	0.0915	0.0261	0.0659	0.1286	0.1303	0.1733	0.1111	0.1978	0.108	0.4738	0.0846	0.4245	0.1607	0.4068	0.0916	0.3682	0.0788	0.1057	0.4415	0.1973	0.2019	0.371	0.1703	0.1265	0.0699	0.1396	0.4636
rg	0.0137	0.3241	0.0008	0.1667	0.2309	0.0121	0.1656	0.1096	0.2404	0.1062	0.0399	0.0616	0.006	0.1006	0.0021	0.0677	0	0.4183	0.4322	0.331	0.0372	0.156	0.0305	0.2219	0.1761	0.2541	0.0113	0.0238	0.1225	0.0163	0.115	0.4412	0.0176	0.0018	0.0548	0.001	0.1546	0.0163	0.3724	0.1934	0.4448	0.0036	0.1757	0.0494	0.0212	0.0106	0.2907	0.4779	0.003
CG11073	0.169	0.3797	0.3887	0.0132	0.1287	0.0016	0.4172	0.1522	0.0614	0.0001	0.0067	0.3074	0.0007	0.4536	0.0586	0.0921	0.0885	0.1038	0.021	0.059	0.3446	0.0085	0.0045	0.1596	0.1327	0.287	0.4109	0.2848	0.14	0.4908	0.1473	0.3922	0.0014	0.0353	0.3073	0.0581	0.1757	0.3717	0.0042	0.0874	0.4007	0.0047	0.3479	0.2828	0.0704	0.0042	0.0098	0.2134	0.0627
sun	0.0542	0.1263	0.0804	0.0306	0.0141	0.2413	0.0908	0.0001	0.0493	0.0866	0.4073	0.0282	0.5585	0.1063	0.1815	0.4007	0.1103	0.0395	0.0006	0.0412	0.1047	0.0311	0.2984	0.0417	0.0068	0.3283	0.126	0.0344	0	0.0269	0.0002	0.2076	0.2279	0.1509	0.0046	0.1281	0.0622	0.0635	0.0083	0	0.2277	0.3866	0.6024	0.1168	0.5254	0.4116	0.0264	0.2062	0.1038
hiw	0.0111	0.3838	0.0066	0.2137	0.522	0.012	0.0891	0.3288	0.3333	0.0183	0.0246	0.1897	0.0006	0.2054	0	0.1416	0.0004	0.2466	0.3441	0.2336	0.1279	0.1137	0.0378	0.4717	0.4293	0.2267	0.0527	0.2006	0.3505	0.0209	0.299	0.4088	0.0178	0.0015	0.0941	0.005	0.5764	0.0409	0.1622	0.4889	0.4881	0.0016	0.2365	0.0672	0.084	0.0092	0.2371	0.2638	0.0016
CG42788	0.0304	0.2587	0.0185	0.446	0.0997	0.2385	0.3186	0.0445	0.4799	0.4273	0.2267	0.0371	0.155	0.4691	0.03	0.333	0.089	0.4166	0.3212	0.3786	0.0362	0.3492	0.0882	0.2756	0.1711	0.4911	0.1739	0.0496	0.0542	0.0257	0.0491	0.3915	0.2896	0.0527	0.0086	0.0589	0.4212	0.0081	0.467	0.0781	0.3064	0.0605	0.3765	0.3061	0.5214	0.1009	0.46	0.2772	0.0706
CG12075	0.0932	0.4557	0.212	0.044	0.1302	0.0053	0.3016	0.2293	0.0734	0.0008	0.0149	0.3251	0.0021	0.4064	0.0778	0.0165	0.067	0.267	0.1865	0.1647	0.4616	0.0122	0.0112	0.1714	0.173	0.4031	0.2687	0.4226	0.2077	0.344	0.2069	0.4203	0.0047	0.0346	0.401	0.0547	0.3122	0.2335	0.053	0.1819	0.4008	0.0089	0.2964	0.145	0.0183	0.0067	0.0377	0.1956	0.0338
Tsp39D	0.3754	0.4273	0.3126	0.0344	0.3444	0.0179	0.3877	0.2322	0.0707	0.0118	0.0242	0.5455	0.0033	0.4132	0.0477	0.2768	0.0867	0.1103	0.0143	0.0519	0.4059	0.0429	0.0164	0.2988	0.2529	0.1909	0.3166	0.5447	0.2101	0.4856	0.2886	0.4066	0.0234	0.0578	0.3481	0.054	0.2434	0.3464	0.0197	0.0921	0.3144	0.0072	0.0936	0.3841	0.1981	0.0457	0.0373	0.3935	0.1518
CG12065	0.5255	0.4652	0.3426	0.4349	0.6084	0.3346	0.3673	0.3445	0.2585	0.3326	0.187	0.1642	0.4812	0.3556	0.3327	0.4162	0.3229	0.2798	0.4501	0.0844	0.0499	0.403	0.5335	0.5779	0.5844	0.4805	0.5548	0.3283	0.3456	0.3504	0.3661	0.0263	0.4008	0.403	0.6042	0.3254	0.408	0.3507	0.4402	0.345	0.0158	0.5855	0.0157	0.1018	0.5098	0.2965	0.1417	0.0186	0.3437
Cchl	0.0081	0.0734	0.0004	0.3051	0.1225	0.0861	0.0858	0.1006	0.4422	0.2553	0.0852	0.0496	0.0126	0.026	0.0026	0.1186	0	0.147	0.2652	0.3654	0.0934	0.2632	0.0662	0.1159	0.1212	0.1242	0.0015	0.0367	0.1052	0.0212	0.1097	0.4356	0.1007	0.0005	0.0637	0	0.0703	0.0134	0.3776	0.1195	0.3007	0.0032	0.1395	0.0159	0.0802	0.0146	0.3648	0.4352	0.0004
Smg5	0.0971	0.4062	0.1284	0.0337	0.5549	0.0219	0.397	0.448	0.1144	0.019	0.0028	0.4855	0.0175	0.4191	0.0567	0.1291	0.054	0.3909	0.2535	0.3546	0.5	0.0791	0.0024	0.4224	0.5307	0.4904	0.1301	0.2224	0.4747	0.3023	0.4664	0.2469	0.0095	0.0059	0.3197	0.0191	0.4618	0.0437	0.1411	0.4627	0.2244	0.0041	0.458	0.0669	0.014	0.0004	0.0127	0.3012	0.0203
SLIRP1	0.0193	0.2669	0.1342	0.0546	0.1726	0.4065	0.0292	0.1528	0.0578	0.3624	0.3927	0.1117	0.3096	0.3476	0.1726	0.3594	0.2699	0.4246	0.1515	0.2772	0.162	0.1669	0.4651	0.1436	0.1527	0.2091	0.329	0.2272	0.1473	0.0247	0.137	0.4643	0.2843	0.2828	0.0746	0.3962	0.3506	0.1895	0.286	0.1567	0.3858	0.2389	0.3162	0.2493	0.1588	0.3543	0.1097	0.3324	0.1551
CG13252	0.3656	0.479	0.4181	0.0002	0.1403	0.0264	0.1105	0.1415	0.0018	0.0296	0.0304	0.2365	0.127	0.3255	0.2732	0.2265	0.2627	0.348	0.0257	0.0628	0.3084	0.027	0.0218	0.1149	0.1266	0.3206	0.4638	0.3311	0.1343	0.1666	0.1285	0.4761	0.0145	0.1619	0.1498	0.128	0.215	0.436	0.0412	0.1337	0.4662	0.125	0.302	0.4563	0.0477	0.0798	0.0031	0.4276	0.3462
Mitofilin	0.0774	0.1457	0.0939	0.0487	0.0304	0.2303	0.1553	0.0005	0.0766	0.0364	0.329	0.0399	0.3301	0.0889	0.277	0.4684	0.1851	0.0215	0	0.0282	0.0724	0.0331	0.2701	0.0312	0.0021	0.4768	0.1217	0.0169	0.0005	0.0482	0.0006	0.2509	0.208	0.2697	0.0227	0.3011	0.0158	0.0783	0.0029	0.0007	0.1884	0.5592	0.566	0.115	0.5491	0.5595	0.0265	0.2587	0.1949
pyd	0.0005	0.1226	0.0022	0.3123	0.1191	0.2675	0.0085	0.0617	0.2412	0.4929	0.2444	0.0234	0.0602	0.0277	0.003	0.2696	0.0024	0.1268	0.0813	0.1793	0.0729	0.4625	0.2551	0.0841	0.085	0.0732	0.022	0.0502	0.0667	0.0004	0.0624	0.3647	0.3012	0.0078	0.017	0.0074	0.081	0.0212	0.1469	0.0822	0.313	0.0367	0.199	0.0241	0.2354	0.0608	0.3193	0.4921	0.0044
ND-20	0.0627	0.1124	0.0823	0.0751	0.0342	0.3073	0.0875	0.0003	0.087	0.1282	0.5068	0.0345	0.5084	0.0988	0.1764	0.4253	0.1036	0.0282	0.0001	0.0429	0.1347	0.0636	0.3007	0.0528	0.0065	0.3042	0.1221	0.0163	0.0001	0.0353	0.0003	0.209	0.2997	0.1089	0.01	0.0989	0.0365	0.0631	0.0075	0	0.1614	0.3703	0.5571	0.111	0.4333	0.3529	0.0596	0.206	0.0992
Tollo	0.0038	0.2814	0.0004	0.3876	0.1353	0.0457	0.095	0.0785	0.4178	0.2241	0.1302	0.008	0.012	0.0523	0	0.1785	0.0004	0.4706	0.3714	0.3468	0.02	0.2683	0.0795	0.1274	0.1131	0.1141	0.0154	0.0402	0.0846	0.0039	0.0811	0.3423	0.0808	0.0046	0.0313	0.001	0.1421	0.0237	0.4702	0.1383	0.3599	0.0095	0.1568	0.084	0.1751	0.0411	0.485	0.395	0.0039
Rop	0.4598	0.0961	0.2272	0.059	0.0092	0.0612	0.3381	0.0393	0.0397	0.0218	0.2893	0.1307	0.1246	0.1423	0.4008	0.201	0.4877	0.0345	0.0131	0.0041	0.3707	0.0134	0.0664	0.0064	0.0033	0.3281	0.1932	0.0594	0.0346	0.1884	0.0297	0.09	0.0463	0.4107	0.1133	0.2703	0.0149	0.2344	0.0011	0.0296	0.0452	0.1543	0.4754	0.1864	0.1908	0.1632	0.0676	0.3724	0.4542
Pcmt	0.0634	0.1097	0.0384	0.1499	0.0744	0.4395	0.1086	0.0148	0.2321	0.1257	0.2891	0.011	0.4473	0.0428	0.1573	0.3261	0.103	0.0667	0.0212	0.1929	0.0277	0.2978	0.4261	0.0553	0.0446	0.3856	0.0564	0.0296	0.0159	0.0258	0.0186	0.3287	0.4329	0.1933	0.0235	0.0834	0.0392	0.1102	0.0583	0.0161	0.4334	0.378	0.1969	0.173	0.2746	0.4536	0.0565	0.0928	0.1404
Sccpdh1	0.4534	0.3075	0.38	0.2769	0.1455	0.1616	0.2713	0.1321	0.3638	0.0861	0.3914	0.3638	0.1288	0.2396	0.2461	0.1588	0.2289	0.0776	0.0602	0.1247	0.317	0.0181	0.416	0.2431	0.155	0.0497	0.5172	0.1501	0.1319	0.3611	0.1343	0.0676	0.1846	0.3543	0.1693	0.2661	0.2186	0.1686	0.0662	0.1272	0.14	0.2847	0.0898	0.4513	0.3892	0.3654	0.3325	0.4091	0.3318
CG3719	0.0084	0.2093	0.0261	0.0454	0.0473	0.3792	0.0398	0.0033	0.0761	0.1483	0.4083	0.0085	0.3952	0.0781	0.0908	0.4895	0.0711	0.0969	0.0128	0.0941	0.0293	0.1172	0.4226	0.0444	0.0203	0.2453	0.1055	0.0454	0.0049	0.0024	0.0023	0.3985	0.3149	0.1228	0	0.1023	0.0776	0.0564	0.0377	0.0093	0.4363	0.217	0.4803	0.1015	0.5224	0.3371	0.0344	0.2433	0.0632
CG11050	0.2999	0.2335	0.1235	0.0056	0.0016	0.0357	0.1916	0.0234	0.0063	0.0207	0.2761	0.1149	0.175	0.1854	0.4852	0.108	0.4861	0.0199	0.0102	0.0021	0.2908	0.0015	0.15	0.0154	0.0046	0.4377	0.1486	0.0844	0.0174	0.0899	0.0117	0.0571	0.0271	0.4842	0.0362	0.3935	0.0665	0.0915	0.0057	0.0126	0.0685	0.2504	0.1867	0.1299	0.1249	0.2615	0.0637	0.4457	0.3942
CG7430	0.0822	0.1028	0.1057	0.0352	0.0094	0.1999	0.1441	0.0004	0.0461	0.0545	0.3889	0.0396	0.3799	0.1013	0.2262	0.3945	0.1284	0.0161	0.0004	0.018	0.1391	0.0183	0.2656	0.0281	0.0024	0.3352	0.1264	0.0267	0.0001	0.0632	0.0009	0.1928	0.1931	0.1957	0.0221	0.1746	0.0301	0.0863	0.0027	0.0001	0.1482	0.5214	0.5717	0.1208	0.5258	0.5235	0.021	0.2158	0.1229
CG5116	0.542	0.0791	0.1213	0.1678	0.0057	0.1304	0.4662	0.0362	0.1724	0.0199	0.3343	0.0617	0.1833	0.1241	0.4307	0.1689	0.3387	0.0106	0.0298	0.0488	0.1899	0.0295	0.2114	0.0429	0.0351	0.486	0.1238	0.027	0.0373	0.1564	0.0399	0.134	0.1256	0.4337	0.1023	0.4123	0.0327	0.1168	0.006	0.0195	0.1763	0.2063	0.4735	0.2396	0.3479	0.2156	0.1155	0.2034	0.4855
PKD	0.0842	0.3673	0.2671	0.0216	0.1407	0.0015	0.3524	0.2258	0.0749	0.0002	0.0033	0.3779	0.0001	0.4864	0.0282	0.0729	0.048	0.1759	0.0739	0.0947	0.5366	0.0099	0.0028	0.1861	0.1646	0.2938	0.325	0.4211	0.2112	0.3795	0.2271	0.4273	0.0014	0.0163	0.4466	0.0237	0.2179	0.2159	0.0197	0.1759	0.4626	0.0023	0.3206	0.1889	0.0406	0.0027	0.0145	0.2319	0.032
kst	0.0184	0.2596	0.0537	0.3701	0.2584	0.0461	0.0816	0.4621	0.3895	0.0591	0.1341	0.2858	0.0247	0.3548	0.0383	0.1335	0.0462	0.1662	0.4879	0.2234	0.0511	0.2312	0.1119	0.6018	0.5789	0.274	0.3157	0.4113	0.4659	0.0234	0.432	0.2803	0.065	0.0706	0.1422	0.0709	0.2896	0.1102	0.1889	0.5445	0.4306	0.0646	0.3448	0.1989	0.1893	0.0859	0.4444	0.2079	0.047
CG11168	0.0952	0.4257	0.232	0.0154	0.3153	0.0009	0.355	0.3778	0.064	0.0013	0.0023	0.4835	0	0.391	0.0217	0.0627	0.025	0.248	0.0741	0.1126	0.4872	0.0091	0.0026	0.323	0.3925	0.2468	0.2401	0.4262	0.363	0.3591	0.4274	0.4444	0.0008	0.0059	0.5049	0.0118	0.3867	0.2128	0.0264	0.2246	0.493	0.0003	0.2355	0.1538	0.0275	0.0009	0.0156	0.2737	0.0213
ND-PDSW	0.059	0.1087	0.0849	0.0253	0.0183	0.2445	0.054	0.0005	0.0331	0.0974	0.4188	0.0308	0.5435	0.0856	0.1937	0.4171	0.1073	0.0412	0	0.0271	0.1332	0.0372	0.272	0.0228	0.0019	0.2583	0.125	0.0394	0.0003	0.0284	0.0001	0.2113	0.2212	0.1443	0.0087	0.1278	0.0365	0.0806	0.0048	0.0012	0.1758	0.4136	0.5474	0.1104	0.5323	0.4275	0.0211	0.2438	0.1079
Xxylt	0.1612	0.5134	0.3023	0.015	0.1287	0.0004	0.4442	0.168	0.0273	0.0003	0.0099	0.3121	0.0004	0.4563	0.0912	0.024	0.0734	0.2132	0.0776	0.0861	0.499	0.003	0.0037	0.1461	0.1433	0.4249	0.295	0.3803	0.1616	0.5157	0.1616	0.3623	0.0009	0.0356	0.2581	0.0441	0.2844	0.3008	0.0205	0.1206	0.5001	0.0017	0.2179	0.229	0.0238	0.0042	0.0159	0.2475	0.0594
kibra	0.0351	0.0964	0.0435	0.1841	0.0837	0.4812	0.1208	0.0033	0.1847	0.188	0.4082	0.0336	0.4013	0.0724	0.1137	0.4114	0.0506	0.0487	0.0049	0.0676	0.0764	0.173	0.5419	0.0661	0.0193	0.3164	0.0946	0.0045	0.005	0.0266	0.0079	0.2134	0.4318	0.0721	0.0242	0.0747	0.0209	0.0392	0.023	0.0102	0.1302	0.2132	0.4076	0.0762	0.2806	0.2454	0.1379	0.3242	0.059
CG13369	0.3224	0.309	0.2055	0.0415	0.0112	0.0751	0.1966	0.0626	0.0133	0.1288	0.4664	0.2303	0.2598	0.3028	0.451	0.0872	0.4843	0.071	0.0689	0.0013	0.3952	0.0141	0.1954	0.0196	0.02	0.3276	0.2151	0.1067	0.0563	0.1411	0.0427	0.0074	0.0656	0.389	0.0511	0.3662	0.1216	0.0904	0.0488	0.063	0.0253	0.369	0.1337	0.0774	0.1075	0.3815	0.2365	0.1351	0.315
RpL24	0.119	0.2346	0.4441	0.0323	0.1296	0.0006	0.4795	0.2434	0.0276	0.0159	0.1244	0.4499	0.0158	0.4205	0.0838	0.0375	0.1054	0.0969	0.1441	0.0103	0.207	0.0096	0.0136	0.1566	0.1623	0.4697	0.4379	0.3414	0.2276	0.4539	0.229	0.0755	0.0013	0.115	0.3387	0.0635	0.2154	0.4833	0.0371	0.2091	0.0941	0.0207	0.2118	0.4337	0.0311	0.0383	0.1545	0.4169	0.1384
Atg18b	0.0612	0.3458	0.2094	0.1593	0.1821	0.0266	0.1715	0.2713	0.2094	0.0115	0.139	0.4343	0.0095	0.41	0.0731	0.0505	0.1044	0.2044	0.1622	0.1082	0.3309	0.0165	0.0304	0.1971	0.2199	0.3253	0.2964	0.3161	0.2677	0.2713	0.2705	0.1556	0.0222	0.0617	0.4528	0.0346	0.22	0.3113	0.0299	0.2132	0.1988	0.0197	0.3565	0.2593	0.0626	0.0235	0.1327	0.4779	0.0506
GlcAT-S	0.01	0.0934	0.0043	0.3293	0.1132	0.1941	0.0016	0.0881	0.2357	0.355	0.2606	0.0246	0.0424	0.0107	0.0094	0.1326	0.0031	0.3641	0.2133	0.3061	0.0966	0.3644	0.3352	0.0425	0.0738	0.0159	0.0132	0.0845	0.0909	0.0034	0.0842	0.3808	0.2757	0.0279	0.0451	0.0371	0.0611	0.0667	0.3238	0.1298	0.4105	0.1075	0.1049	0.0223	0.2847	0.1423	0.2947	0.3708	0.0105
ATP6AP2	0.0179	0.0337	0.0105	0.3627	0.121	0.316	0.0406	0.0535	0.2951	0.4021	0.3119	0.0551	0.1629	0.0081	0.0574	0.1706	0.0119	0.0717	0.0517	0.113	0.0878	0.4917	0.375	0.0861	0.0667	0.1549	0.012	0.0235	0.0589	0.0227	0.0682	0.3627	0.3161	0.026	0.0604	0.0169	0.0143	0.0524	0.0959	0.073	0.1708	0.1015	0.1713	0.022	0.1444	0.1078	0.3285	0.3723	0.0157
snRNA:U2:34ABb	0.0063	0.148	0.0007	0.3239	0.1613	0.0609	0.0327	0.1068	0.444	0.1276	0.1015	0.112	0.0099	0.0372	0.0088	0.063	0.0035	0.259	0.4119	0.475	0.1191	0.1345	0.0532	0.1658	0.1231	0.167	0.0018	0.0635	0.1077	0.016	0.1062	0.4364	0.0577	0.004	0.0347	0.0003	0.1282	0.0195	0.3751	0.2038	0.4101	0.0047	0.243	0.0138	0.0376	0.011	0.2872	0.487	0.0008
CG33981	0.0102	0.2197	0.0001	0.1856	0.2086	0.0157	0.1442	0.135	0.246	0.1015	0.0667	0.0507	0.0047	0.073	0.0001	0.1034	0	0.4535	0.4247	0.2644	0.0701	0.1017	0.0303	0.2454	0.17	0.1496	0.0023	0.0455	0.1424	0.0215	0.1224	0.3446	0.0201	0.0007	0.0578	0	0.2192	0.0237	0.276	0.2933	0.3806	0.0007	0.1648	0.0758	0.0449	0.007	0.2538	0.3549	0.0021
Eogt	0.0114	0.1255	0.0101	0.4409	0.122	0.1811	0.0734	0.0662	0.4398	0.3591	0.1449	0.1048	0.0724	0.0472	0.0431	0.1152	0.0163	0.0668	0.1225	0.1953	0.1138	0.3854	0.1063	0.1153	0.0958	0.3402	0.0146	0.0309	0.0696	0.0239	0.0767	0.324	0.1741	0.0101	0.0352	0.0134	0.056	0.0106	0.281	0.0792	0.1591	0.0299	0.4365	0.009	0.0754	0.0235	0.4241	0.4821	0.0052
AnxB10	0.1282	0.4406	0.4447	0.3981	0.2455	0.0752	0.1106	0.2953	0.4368	0.0837	0.3089	0.4721	0.043	0.3199	0.1784	0.0375	0.1637	0.06	0.2755	0.2	0.4084	0.081	0.3015	0.3564	0.321	0.0897	0.4669	0.2945	0.2913	0.3091	0.3009	0.0817	0.1287	0.2634	0.3495	0.2972	0.327	0.3486	0.1417	0.2121	0.2745	0.1577	0.1571	0.3284	0.2856	0.1907	0.4412	0.1732	0.1605
cher	0.0094	0.226	0.0047	0.3585	0.1221	0.0795	0.0783	0.0941	0.487	0.172	0.0315	0.0829	0.0176	0.0696	0.0037	0.2015	0.0018	0.2047	0.3369	0.3487	0.1616	0.341	0.0582	0.1127	0.1171	0.1928	0.0083	0.052	0.0974	0.0163	0.0957	0.2596	0.0884	0.0001	0.0356	0.0018	0.107	0.0034	0.4946	0.11	0.2178	0.0073	0.3838	0.0058	0.1036	0.0148	0.2796	0.3173	0
Ptp10D	0.0003	0.1102	0.0098	0.0988	0.0872	0.4985	0.0117	0.0398	0.0651	0.2923	0.3605	0.0256	0.2442	0.0388	0.024	0.4401	0.0211	0.1219	0.0511	0.0703	0.1265	0.2208	0.5961	0.0254	0.0328	0.0191	0.0649	0.0788	0.0434	0.0003	0.0361	0.2397	0.4118	0.0381	0.0123	0.0599	0.0745	0.0528	0.0672	0.0616	0.1987	0.1336	0.3726	0.0371	0.428	0.204	0.1528	0.4327	0.0149
ph-p	0.0696	0.424	0.192	0.0294	0.2253	0.0001	0.2932	0.3186	0.0761	0.0014	0.0196	0.4822	0.0003	0.4046	0.0176	0.0495	0.0233	0.1696	0.1049	0.0669	0.3739	0.0064	0.0061	0.252	0.2621	0.2507	0.2855	0.4733	0.3007	0.2941	0.3119	0.2685	0.0001	0.0138	0.5089	0.0102	0.281	0.222	0.0289	0.221	0.3167	0.0011	0.1991	0.2173	0.031	0.0038	0.0454	0.3541	0.0262
fab1	0.0066	0.1328	0.001	0.4773	0.1191	0.1984	0.1001	0.0548	0.4108	0.5057	0.2097	0.01	0.0575	0.0386	0.0018	0.264	0.0006	0.1236	0.0964	0.2909	0.0292	0.5065	0.1615	0.106	0.104	0.1494	0.0227	0.0167	0.0637	0.0067	0.0669	0.4124	0.226	0.0036	0.0311	0.0026	0.0755	0.0151	0.1751	0.0708	0.3888	0.0247	0.1519	0.0521	0.1799	0.0498	0.3611	0.3299	0.0049
mRpL23	0.0259	0.4927	0.0789	0.2892	0.513	0.0308	0.0921	0.4971	0.3611	0.0361	0.1094	0.2082	0.0037	0.2144	0.004	0.1693	0.0141	0.1764	0.2042	0.1508	0.2716	0.0724	0.0724	0.4623	0.504	0.0673	0.1629	0.4216	0.5056	0.0966	0.4445	0.2141	0.0456	0.0228	0.2863	0.0222	0.3954	0.1988	0.0982	0.3728	0.2029	0.0079	0.2099	0.187	0.2507	0.0396	0.2639	0.4184	0.0179
atl	0.2221	0.1931	0.3432	0.0188	0.1961	0.1022	0.2603	0.1714	0.0344	0.1085	0.301	0.2724	0.2247	0.3781	0.4618	0.0744	0.3272	0.2651	0.059	0.0747	0.3479	0.006	0.2698	0.2123	0.2197	0.362	0.5231	0.3319	0.171	0.1641	0.1802	0.1294	0.0659	0.4448	0.113	0.2486	0.3573	0.1913	0.0863	0.0941	0.2747	0.411	0.0209	0.3696	0.0498	0.3848	0.1032	0.3161	0.461
18SrRNA-Psi:CR45861	0.343	0.3156	0.1104	0.0767	0.0039	0.1546	0.4068	0.015	0.12	0.0269	0.1837	0.0038	0.2318	0.1988	0.3223	0.1034	0.3347	0.1869	0.0389	0.1954	0.0596	0.0255	0.162	0.0168	0.0185	0.3253	0.2103	0.041	0.0163	0.0722	0.0135	0.4145	0.0981	0.4983	0.0517	0.495	0.0678	0.2091	0.013	0.0096	0.4306	0.2869	0.303	0.5017	0.0991	0.161	0.0139	0.1849	0.471
CG12025	0.0495	0.1121	0.0898	0.0058	0.0104	0.1694	0.0203	0.0169	0.0005	0.085	0.3825	0.0698	0.4206	0.0893	0.203	0.373	0.1473	0.0512	0.0102	0.0079	0.1943	0.0282	0.233	0.0101	0.0045	0.1693	0.1182	0.1032	0.0126	0.032	0.0066	0.1858	0.1574	0.19	0.0079	0.2144	0.0747	0.0852	0.0177	0.0185	0.1372	0.5134	0.3224	0.0746	0.4302	0.5167	0.0439	0.3988	0.0981
Meltrin	0.1274	0.1425	0.0656	0.3142	0.3905	0.1779	0.0074	0.2909	0.3978	0.4115	0.3999	0.0183	0.1386	0.038	0.1202	0.0378	0.055	0.282	0.4025	0.3516	0.0234	0.1694	0.3936	0.1213	0.2141	0.0606	0.042	0.2907	0.2824	0.0443	0.2601	0.0308	0.2563	0.2137	0.1771	0.1446	0.1551	0.5298	0.491	0.44	0.1722	0.1713	0.0911	0.2726	0.302	0.2304	0.2254	0.294	0.1578
ND-B17	0.0246	0.1668	0.0485	0.0628	0.0387	0.3429	0.0903	0.0005	0.1043	0.1067	0.4171	0.0158	0.493	0.0982	0.1352	0.4676	0.0863	0.0633	0.0016	0.0694	0.0404	0.07	0.3886	0.0521	0.014	0.3536	0.118	0.0197	0.0011	0.0127	0.0004	0.2692	0.2966	0.1331	0.0003	0.1119	0.0594	0.0569	0.0154	0.0019	0.3312	0.2948	0.5155	0.1131	0.4295	0.3651	0.0309	0.2067	0.0899
mfrn	0.0993	0.1779	0.0236	0.2599	0.0893	0.2792	0.0747	0.0625	0.3162	0.4142	0.4384	0.0005	0.1703	0.0303	0.0522	0.2522	0.0322	0.4084	0.2169	0.4469	0.0118	0.4857	0.4793	0.0228	0.0536	0.0512	0.0684	0.0666	0.0702	0.0145	0.0543	0.1284	0.4353	0.2088	0.0739	0.1384	0.0877	0.2961	0.2687	0.1671	0.2402	0.248	0.0388	0.2747	0.4511	0.3897	0.1059	0.3397	0.157
CG14407	0.0372	0.0223	0.0055	0.406	0.1205	0.3251	0.0907	0.0726	0.3368	0.3753	0.304	0.0351	0.1873	0.0072	0.0305	0.2394	0.0047	0.0743	0.0903	0.1351	0.0936	0.4807	0.3619	0.1089	0.1084	0.1372	0.004	0.0165	0.0792	0.0462	0.0946	0.319	0.3318	0.0149	0.0845	0.0027	0.0248	0.0533	0.1075	0.0838	0.2632	0.1043	0.0744	0.0522	0.1443	0.1271	0.3778	0.2095	0.0186
Liprin-gamma	0.0381	0.471	0.0397	0.0981	0.5913	0.0052	0.13	0.4938	0.2401	0.0035	0.0054	0.3649	0.0003	0.2356	0.0079	0.0571	0.0068	0.3029	0.256	0.26	0.3781	0.0305	0.0207	0.528	0.5383	0.1978	0.0832	0.346	0.5114	0.0987	0.49	0.4869	0.0043	0.0026	0.273	0.0075	0.5372	0.0623	0.1107	0.3694	0.4022	0.001	0.2495	0.0351	0.0246	0.0016	0.0717	0.205	0.0029
AnxB9	0.0035	0.169	0.0017	0.3547	0.179	0.0342	0.048	0.0955	0.4547	0.1538	0.0721	0.0653	0.009	0.0351	0.0056	0.0413	0.0008	0.3805	0.3033	0.4634	0.0892	0.2012	0.0955	0.119	0.1008	0.1067	0.0084	0.0448	0.1065	0.0076	0.0934	0.4564	0.0568	0.0052	0.0506	0.0124	0.0791	0.0309	0.4972	0.1832	0.3145	0.0123	0.1722	0.0138	0.0629	0.0182	0.4118	0.3142	0.0016
Ypel	0.4216	0.4535	0.4782	0.002	0.0085	0.0006	0.3197	0.0474	0.0047	0.0006	0.0241	0.1742	0.0088	0.3922	0.1934	0.0452	0.176	0.1225	0.0129	0.022	0.3764	0.0021	0.0015	0.0146	0.0159	0.45	0.5117	0.2378	0.0377	0.2575	0.0368	0.2904	0.0002	0.1116	0.0912	0.0976	0.1468	0.5005	0.0035	0.0193	0.3728	0.0065	0.2476	0.4193	0.0306	0.0079	0.0064	0.3557	0.1938
su(w[a])	0.0147	0.2544	0.0056	0.3374	0.1093	0.1325	0.1756	0.1034	0.4802	0.2292	0.0383	0.0686	0.0309	0.1261	0.0018	0.4527	0.0046	0.2248	0.4079	0.3991	0.185	0.4198	0.0471	0.134	0.1246	0.1996	0.0197	0.0542	0.1077	0.0332	0.1071	0.1883	0.1471	0.0004	0.0442	0.0028	0.1568	0.0017	0.4827	0.1317	0.2973	0.006	0.4533	0.0335	0.2385	0.0167	0.2595	0.4622	0.0027
CG2991	0.2292	0.2804	0.1126	0.0182	0.0016	0.0444	0.2024	0.0319	0.0073	0.0296	0.2898	0.0663	0.2258	0.1755	0.3567	0.0456	0.4084	0.0508	0.0304	0.0162	0.2201	0.0018	0.1656	0.0155	0.0187	0.3032	0.1293	0.0938	0.0271	0.0675	0.0171	0.0933	0.033	0.4107	0.0308	0.4851	0.0992	0.0796	0.0142	0.0187	0.2297	0.2719	0.1882	0.1729	0.0687	0.2315	0.0613	0.4192	0.3473
Mob2	0.1313	0.4258	0.3335	0.0223	0.1643	0.0024	0.3543	0.2233	0.0549	0.0022	0.0323	0.389	0.0029	0.4772	0.0547	0.0641	0.0797	0.1745	0.0448	0.0453	0.5078	0.0024	0.004	0.1756	0.1721	0.3359	0.3593	0.4086	0.215	0.4622	0.2205	0.2515	0.0007	0.035	0.4271	0.0232	0.2365	0.3408	0.006	0.16	0.268	0.004	0.2953	0.304	0.0309	0.0046	0.0298	0.4521	0.05
CG11537	0	0.3385	0.002	0.2954	0.1049	0.1882	0.0055	0.0588	0.2771	0.3657	0.2597	0.0147	0.0433	0.0416	0.0052	0.2611	0.0058	0.3709	0.1971	0.4124	0.028	0.4718	0.1731	0.0823	0.0842	0.1139	0.0321	0.0713	0.0606	0.0003	0.0537	0.4163	0.2653	0.0173	0.0094	0.0159	0.1054	0.0238	0.3876	0.0783	0.4362	0.0392	0.2614	0.0453	0.3388	0.0734	0.3205	0.4899	0.0061
sba	0.0029	0.2216	0.0016	0.442	0.1186	0.1371	0.0515	0.047	0.4104	0.4193	0.1996	0.0117	0.0451	0.0333	0.0045	0.1987	0.0019	0.1925	0.1112	0.368	0.0092	0.4575	0.1317	0.0967	0.0875	0.1748	0.0301	0.0287	0.0537	0.0015	0.0559	0.491	0.1925	0.0088	0.0184	0.0051	0.0786	0.0181	0.266	0.07	0.437	0.0339	0.1905	0.0451	0.1857	0.0461	0.3537	0.4223	0.0062
CG9921	0.0161	0.2723	0.0001	0.1342	0.3027	0.01	0.1318	0.1955	0.2314	0.0488	0.0323	0.116	0.0021	0.1015	0.0002	0.0869	0	0.4689	0.3783	0.285	0.1305	0.0776	0.0185	0.3267	0.2523	0.1901	0.0022	0.0583	0.2131	0.031	0.1792	0.4404	0.0103	0.0006	0.0709	0	0.2736	0.0162	0.2297	0.3466	0.4997	0.0006	0.2065	0.0431	0.0216	0.0022	0.1601	0.5069	0.0005
Wdr62	0.0086	0.2664	0.0122	0.0987	0.0363	0.4531	0.0589	0.0186	0.1075	0.2438	0.4678	0.0098	0.2804	0.105	0.0406	0.4021	0.0532	0.1135	0.0495	0.1464	0.0503	0.1434	0.412	0.069	0.0615	0.2249	0.0977	0.06	0.0203	0.0055	0.0176	0.3231	0.3921	0.0639	0.0041	0.0535	0.1154	0.0263	0.093	0.0227	0.4757	0.1191	0.5873	0.0988	0.4882	0.2242	0.1283	0.2713	0.037
CG5902	0.0186	0.3248	0.037	0.4024	0.3354	0.1152	0.1078	0.3007	0.423	0.1445	0.0297	0.1727	0.0325	0.2116	0.0149	0.3036	0.0213	0.4381	0.4573	0.3837	0.3504	0.3931	0.1963	0.1678	0.229	0.0739	0.0989	0.1845	0.314	0.0485	0.2518	0.2321	0.1789	0.0198	0.1737	0.0993	0.3119	0.0549	0.4738	0.3908	0.1559	0.0298	0.3764	0.027	0.388	0.0456	0.3133	0.0438	0.0138
CG42342	0.0947	0.2898	0.1352	0.1584	0.1828	0.3727	0.0325	0.2225	0.0883	0.4526	0.5075	0.1982	0.2483	0.1548	0.1422	0.3881	0.212	0.3425	0.4568	0.2557	0.4219	0.4929	0.5245	0.1706	0.212	0.0605	0.147	0.2471	0.2243	0.1264	0.2137	0.4934	0.3963	0.1726	0.1444	0.1516	0.2728	0.1857	0.4691	0.2672	0.425	0.2874	0.3705	0.1312	0.3677	0.3738	0.4461	0.4531	0.1004
Calx	0.0086	0.0852	0.0007	0.3284	0.1213	0.1174	0.06	0.1083	0.4675	0.1991	0.1165	0.0997	0.0174	0.0289	0.0113	0.1235	0.0053	0.1584	0.3664	0.3864	0.1357	0.1885	0.0629	0.1322	0.123	0.1607	0.001	0.0664	0.1106	0.0317	0.1133	0.4832	0.1034	0.0027	0.053	0.0002	0.0949	0.0185	0.4767	0.1628	0.3653	0.0037	0.2633	0.0164	0.0659	0.0099	0.2896	0.3889	0.0007
Xe7	0.0047	0.0756	0.0011	0.4165	0.1222	0.1248	0.0587	0.0967	0.4322	0.3255	0.101	0.0404	0.0177	0.0256	0.0011	0.1549	0	0.1575	0.1984	0.2944	0.0992	0.3519	0.1289	0.1029	0.1107	0.0649	0.0041	0.0408	0.1007	0.0116	0.1016	0.4111	0.1556	0.0005	0.058	0.0016	0.0701	0.017	0.3039	0.1086	0.2695	0.0084	0.1349	0.0155	0.1397	0.0299	0.5152	0.4618	0.0006
Argk	0.1395	0.1041	0.1079	0.0199	0.0081	0.1537	0.1631	0.0017	0.0459	0.0129	0.239	0.0373	0.2651	0.0766	0.3281	0.3846	0.2286	0.0145	0.0003	0.0208	0.094	0.022	0.2006	0.0211	0.0019	0.4202	0.1234	0.0346	0.0017	0.0702	0.0026	0.2724	0.1339	0.3422	0.0359	0.3324	0.0162	0.1086	0.0016	0.0005	0.2534	0.2984	0.5014	0.133	0.4488	0.2847	0.0075	0.1762	0.256
scaf6	0.1043	0.034	0.1043	0.0831	0.0359	0.2718	0.1096	0.0116	0.0741	0.0982	0.4622	0.0395	0.5568	0.0464	0.2134	0.5419	0.0997	0.0262	0.0035	0.0254	0.1637	0.0826	0.2587	0.0121	0.0024	0.1709	0.1078	0.0261	0.0115	0.0749	0.0134	0.208	0.2566	0.1561	0.0849	0.135	0.0017	0.1133	0.0022	0.0109	0.0859	0.5175	0.3203	0.104	0.4227	0.505	0.0416	0.2736	0.1169
fkh	0.4874	0.3039	0.3899	0.0142	0.1207	0.011	0.4378	0.0865	0.0474	0.0076	0.0419	0.3568	0.0084	0.3607	0.1145	0.1007	0.1108	0.1225	0.0121	0.0551	0.3211	0.0051	0.0449	0.2024	0.1272	0.186	0.3469	0.357	0.0833	0.3625	0.1105	0.2828	0.0095	0.1043	0.162	0.0858	0.2897	0.4693	0.0155	0.031	0.3623	0.0591	0.0318	0.372	0.0904	0.0619	0.0297	0.3649	0.1833
emc	0.0589	0.3447	0.1074	0.025	0.4408	0.0009	0.418	0.3628	0.0518	0.0245	0.0066	0.2551	0.0015	0.2564	0.0123	0.0506	0.0051	0.4491	0.2937	0.1637	0.2144	0.048	0.0028	0.4641	0.3954	0.3295	0.1394	0.1959	0.3753	0.2088	0.3614	0.4605	0.0028	0.0036	0.3197	0.0027	0.3411	0.089	0.1787	0.4761	0.4474	0.0006	0.1614	0.1389	0.0148	0.0023	0.0852	0.4257	0.018
Mbs	0.0022	0.2041	0.0001	0.4212	0.1215	0.0576	0.0226	0.0929	0.4909	0.167	0.1026	0.0328	0.0066	0.0272	0	0.1161	0.0004	0.3996	0.3909	0.467	0.0674	0.2194	0.0828	0.1013	0.1116	0.0779	0.0036	0.0651	0.0964	0.0053	0.0974	0.4166	0.0743	0.0008	0.0294	0.0005	0.102	0.0197	0.4289	0.1444	0.4951	0.0049	0.1905	0.0216	0.1153	0.0215	0.418	0.4797	0.0007
SNF4Agamma	0.0085	0.1347	0.0137	0.2305	0.0805	0.4047	0.1018	0.0402	0.1954	0.3247	0.2581	0.0119	0.2273	0.085	0.0077	0.4714	0.0101	0.1207	0.0706	0.1059	0.1117	0.207	0.4026	0.0718	0.0724	0.1186	0.0786	0.0255	0.0469	0.0079	0.0387	0.193	0.5122	0.0156	0.0238	0.0274	0.0977	0.0122	0.0778	0.0502	0.205	0.0818	0.3567	0.0642	0.3784	0.1671	0.2604	0.4628	0.0182
AMPKalpha	0.4449	0.4878	0.393	0.0322	0.0592	0.0285	0.2844	0.1579	0.0142	0.1008	0.4	0.3983	0.1426	0.4972	0.3675	0.0382	0.2811	0.1206	0.1055	0.0073	0.2828	0.0094	0.1383	0.0853	0.1091	0.4571	0.403	0.2768	0.1543	0.276	0.14	0.0089	0.0271	0.4305	0.1364	0.2003	0.2785	0.1974	0.0732	0.1279	0.0578	0.2801	0.0232	0.2016	0.0489	0.2926	0.239	0.1694	0.4904
Pink1	0.4417	0.2378	0.2988	0.1721	0.0216	0.1276	0.3568	0.1288	0.0511	0.2459	0.3407	0.3326	0.3295	0.2965	0.401	0.0809	0.4621	0.1893	0.257	0.0183	0.2117	0.0794	0.1538	0.0164	0.0427	0.1633	0.2341	0.1473	0.1177	0.2833	0.0829	0.0098	0.1189	0.3694	0.1557	0.3457	0.1637	0.178	0.1262	0.2108	0.0385	0.3174	0.3348	0.1115	0.1223	0.3312	0.3759	0.0775	0.3569
brk	0.2688	0.2311	0.2296	0.0091	0.4824	0.0042	0.4999	0.4723	0.0405	0.0101	0.0094	0.458	0.0038	0.3031	0.0498	0.0857	0.036	0.4359	0.0767	0.135	0.492	0.0113	0.0034	0.4379	0.4917	0.2983	0.1819	0.3924	0.468	0.4323	0.4938	0.462	0.0026	0.0134	0.5006	0.0097	0.5355	0.2407	0.0567	0.3096	0.4732	0.0047	0.1482	0.1934	0.0186	0.0046	0.0153	0.4854	0.0556
RpS26	0.2208	0.3163	0.4337	0.0616	0.1272	0.0108	0.4319	0.2478	0.0387	0.0397	0.2554	0.3777	0.041	0.447	0.2389	0.0169	0.2114	0.221	0.1586	0.027	0.227	0.0104	0.0169	0.119	0.1451	0.3469	0.5204	0.3564	0.2393	0.4907	0.2025	0.0523	0.0075	0.2041	0.3703	0.0885	0.2687	0.4619	0.0357	0.2183	0.1083	0.0262	0.3126	0.4533	0.0135	0.0335	0.1384	0.2652	0.2132
par-1	0.0055	0.1028	0.0001	0.3402	0.1215	0.0686	0.0769	0.1029	0.4616	0.2192	0.0843	0.0311	0.0079	0.0274	0	0.1517	0	0.2682	0.3429	0.463	0.0918	0.2504	0.0805	0.1098	0.1193	0.0688	0.0024	0.0492	0.1079	0.0137	0.1081	0.49	0.0911	0.0001	0.0557	0	0.0878	0.019	0.4603	0.1287	0.4232	0.002	0.1211	0.0242	0.1235	0.0194	0.3852	0.4601	0.0008
RpL26	0.0206	0.2273	0.0124	0.2324	0.3744	0.0368	0.0747	0.2755	0.2907	0.0872	0.1487	0.1973	0.0106	0.0833	0.0254	0.0315	0.0147	0.409	0.4327	0.3094	0.1341	0.0481	0.0397	0.3645	0.3281	0.2193	0.0167	0.1962	0.2863	0.066	0.2824	0.2328	0.0279	0.0131	0.143	0.0015	0.2754	0.0914	0.218	0.3837	0.3689	0.0048	0.2296	0.0715	0.0149	0.0104	0.235	0.3413	0.0071
Rilpl	0.0068	0.1088	0.0011	0.342	0.1223	0.0715	0.0695	0.0964	0.4874	0.2206	0.0582	0.0543	0.0109	0.0245	0.0025	0.1155	0	0.192	0.2675	0.345	0.1061	0.2867	0.0718	0.1074	0.113	0.1147	0.0037	0.0426	0.1006	0.0135	0.1015	0.3926	0.0929	0.0002	0.0507	0.0009	0.0765	0.0087	0.4022	0.1228	0.2442	0.0056	0.1783	0.0089	0.0976	0.0157	0.3729	0.404	0.0002
Npc2b	0.2301	0.4059	0.1454	0.0028	0.0081	0.061	0.1355	0.0017	0.0169	0.0106	0.0813	0.0395	0.1653	0.2046	0.4652	0.2302	0.4804	0.0919	0.0004	0.0391	0.082	0.0077	0.1024	0.008	0.0007	0.4582	0.2652	0.0604	0.0011	0.0394	0	0.3905	0.0362	0.3822	0.0137	0.3372	0.0451	0.2201	0.0038	0.0016	0.3797	0.2909	0.3735	0.3269	0.1256	0.2164	0.003	0.367	0.4896
Sesn	0.0668	0.5075	0.1462	0.0205	0.2967	0.0002	0.3373	0.4064	0.0626	0.0019	0.0101	0.4033	0	0.3574	0.0128	0.0459	0.0115	0.2319	0.1404	0.0836	0.3225	0.0099	0.003	0.3113	0.3502	0.2598	0.2088	0.4046	0.389	0.2533	0.4116	0.33	0.0001	0.0082	0.4481	0.0052	0.3732	0.1576	0.0479	0.2786	0.3921	0.0002	0.1801	0.18	0.018	0.0018	0.0513	0.3749	0.0198
Cka	0.0096	0.1416	0.0005	0.2723	0.12	0.0488	0.1767	0.0751	0.3223	0.2774	0.1004	0.0152	0.0165	0.0378	0.0004	0.1492	0.0003	0.2731	0.2871	0.4403	0.0389	0.2805	0.0674	0.1085	0.1145	0.1711	0.0113	0.0163	0.0853	0.0172	0.0892	0.4447	0.077	0.0028	0.0582	0.0018	0.0717	0.0175	0.3939	0.1058	0.4794	0.0062	0.0723	0.0741	0.1002	0.0251	0.4564	0.362	0.0059
CG4230	0.1158	0.1374	0.3543	0.18	0.3653	0.1075	0.4633	0.3718	0.2132	0.0528	0.0844	0.4302	0.0674	0.2729	0.0889	0.4556	0.232	0.2433	0.1106	0.1379	0.525	0.1946	0.0206	0.2116	0.2544	0.4523	0.4718	0.4279	0.353	0.4135	0.3783	0.4402	0.0921	0.0757	0.4261	0.094	0.1538	0.1663	0.0518	0.3113	0.2634	0.03	0.2364	0.4267	0.3357	0.0408	0.0683	0.4821	0.1079
Helz	0.0431	0.1243	0.0769	0.0238	0.0187	0.2615	0.057	0.0021	0.023	0.105	0.4644	0.0263	0.5208	0.0956	0.1546	0.4033	0.098	0.0669	0.0019	0.0303	0.1387	0.0278	0.2862	0.0183	0.0027	0.2221	0.1262	0.0462	0.0018	0.0152	0.0004	0.1928	0.2291	0.1281	0.0053	0.1444	0.0601	0.0659	0.0088	0.0038	0.1561	0.3642	0.5642	0.1007	0.4933	0.3975	0.0277	0.3552	0.0894
anox	0.0193	0.2669	0.1342	0.0546	0.1726	0.4065	0.0292	0.1528	0.0578	0.3624	0.3927	0.1117	0.3096	0.3476	0.1726	0.3594	0.2699	0.4246	0.1515	0.2772	0.162	0.1669	0.4651	0.1436	0.1527	0.2091	0.329	0.2272	0.1473	0.0247	0.137	0.4643	0.2843	0.2828	0.0746	0.3962	0.3506	0.1895	0.286	0.1567	0.3858	0.2389	0.3162	0.2493	0.1588	0.3543	0.1097	0.3324	0.1551
CG10353	0.0094	0.4896	0.0001	0.4374	0.2025	0.1061	0.0794	0.1741	0.5049	0.1525	0.1058	0.0691	0.0209	0.2056	0.0039	0.3831	0.008	0.4769	0.4466	0.3657	0.1142	0.31	0.0572	0.2623	0.2524	0.1848	0.037	0.1387	0.1837	0.0132	0.1507	0.4977	0.1237	0.0063	0.0256	0.0058	0.3571	0.0177	0.2977	0.2489	0.3552	0.0117	0.3973	0.0973	0.2979	0.0389	0.3571	0.4549	0.0093
siz	0.0031	0.2166	0.0064	0.3413	0.1145	0.2411	0.0447	0.0359	0.2978	0.495	0.2258	0.0192	0.0743	0.0497	0.0115	0.292	0.0066	0.1351	0.0603	0.2272	0.0334	0.4013	0.1886	0.0901	0.0721	0.1779	0.052	0.0286	0.043	0.0013	0.0411	0.3678	0.2905	0.013	0.0166	0.0164	0.0768	0.0148	0.1511	0.0611	0.3076	0.0493	0.2887	0.041	0.2406	0.0579	0.2981	0.4914	0.0096
CG3631	0.2056	0.2789	0.2636	0.0221	0.0128	0.0694	0.2732	0.0239	0.0183	0.0711	0.2566	0.127	0.2162	0.4639	0.4299	0.0297	0.4039	0.2677	0.0571	0.0809	0.3013	0.0046	0.1937	0.0419	0.0259	0.4469	0.448	0.2117	0.0236	0.0926	0.0094	0.1516	0.0449	0.4794	0.0225	0.3211	0.3103	0.1462	0.0594	0.0226	0.359	0.4167	0.0595	0.4112	0.0334	0.3007	0.0759	0.4106	0.4448
wdb	0.0078	0.3521	0.0162	0.212	0.0611	0.3962	0.1295	0.0079	0.234	0.3202	0.3586	0.0103	0.2096	0.1157	0.0287	0.48	0.0359	0.1254	0.0419	0.2181	0.0181	0.1828	0.2518	0.0874	0.059	0.3401	0.0969	0.0272	0.0124	0.0028	0.0108	0.326	0.4708	0.0416	0.0033	0.0586	0.1077	0.0123	0.0973	0.0177	0.4164	0.0676	0.5454	0.0951	0.4429	0.1286	0.1759	0.3592	0.0308
CG8034	0.3767	0.3343	0.4669	0.0267	0.0019	0.0061	0.4849	0.0195	0.0368	0.0043	0.1187	0.2781	0.0145	0.4066	0.1566	0.0943	0.1917	0.0249	0.008	0.0086	0.3702	0.001	0.0328	0.0335	0.0018	0.308	0.4644	0.1209	0.0134	0.3474	0.0135	0.1088	0.0064	0.1783	0.1392	0.1066	0.065	0.3513	0.0024	0.0122	0.1126	0.0311	0.1974	0.4149	0.1056	0.0587	0.0464	0.4868	0.239
Ccdc56	0.1195	0.3012	0.2268	0.0058	0.2488	0.002	0.4273	0.319	0.0184	0.0077	0.0099	0.4567	0.0226	0.3749	0.0568	0.1336	0.0722	0.3219	0.1703	0.0831	0.3488	0.0368	0	0.1994	0.2568	0.3842	0.3564	0.4977	0.2928	0.395	0.2815	0.4973	0.0003	0.0237	0.5373	0.0217	0.2472	0.1027	0.0697	0.304	0.4219	0.0034	0.4185	0.3111	0.0088	0.0024	0.0176	0.5138	0.0648
CG31688	0.0162	0.1291	0.0411	0.1288	0.0801	0.4661	0.0634	0.0076	0.1197	0.2073	0.4204	0.0406	0.3718	0.0712	0.1066	0.3787	0.0528	0.0701	0.0058	0.0515	0.085	0.1591	0.5479	0.0425	0.0134	0.2687	0.0945	0.0216	0.0085	0.0122	0.008	0.2231	0.3981	0.0857	0.0168	0.1177	0.0306	0.0422	0.0228	0.0173	0.1246	0.2076	0.4604	0.0527	0.3088	0.241	0.1205	0.4693	0.0501
AMPdeam	0.0371	0.1977	0.0489	0.0474	0.0528	0.3843	0.0792	0.004	0.1324	0.0945	0.196	0.0067	0.4905	0.0522	0.2056	0.3362	0.1454	0.133	0.0036	0.1778	0.0147	0.181	0.3346	0.0302	0.012	0.3406	0.1237	0.0326	0.0054	0.0084	0.0028	0.2872	0.3046	0.3124	0.0063	0.2348	0.029	0.1515	0.0307	0.0085	0.4037	0.4894	0.2564	0.2053	0.5466	0.5787	0.0022	0.1868	0.2012
UQCR-Q	0.1137	0.1869	0.1086	0.0166	0.0034	0.135	0.1883	0.0005	0.0329	0.0133	0.2801	0.0439	0.2516	0.1145	0.3274	0.2707	0.2701	0.0201	0.0011	0.0147	0.1193	0.0044	0.2111	0.0277	0.0026	0.472	0.1276	0.0367	0.0002	0.0616	0.0002	0.1848	0.104	0.3381	0.0203	0.3944	0.0426	0.0815	0.0032	0.0001	0.1861	0.3437	0.3027	0.137	0.3047	0.3262	0.0169	0.2736	0.2637
Sh3beta	0.1444	0.4967	0.3742	0.041	0.2036	0.0012	0.3406	0.248	0.0897	0.0027	0.0239	0.4068	0.0015	0.4124	0.0749	0.0249	0.06	0.0841	0.0941	0.0853	0.4871	0.0099	0.0319	0.2762	0.2677	0.1885	0.4097	0.3501	0.2433	0.4267	0.2636	0.2609	0.0029	0.0649	0.3144	0.0967	0.3166	0.4485	0.0368	0.1357	0.4371	0.0099	0.1442	0.2594	0.0647	0.0147	0.0731	0.1516	0.0769
Atx2	0.0885	0.2125	0.1009	0.0182	0.0048	0.1506	0.1754	0.0001	0.0325	0.0221	0.2979	0.0315	0.2975	0.1201	0.2556	0.2443	0.2283	0.0378	0.0019	0.0317	0.1046	0.0051	0.2359	0.0307	0.0063	0.4257	0.1275	0.0482	0.0003	0.0465	0.0005	0.2135	0.1227	0.2904	0.0154	0.3194	0.0684	0.0752	0.0031	0.0001	0.3018	0.5923	0.2993	0.1382	0.28	0.352	0.0125	0.2097	0.2198
PIG-L	0.0139	0.2971	0.0051	0.5012	0.1087	0.2248	0.1481	0.0599	0.4399	0.409	0.1563	0.0583	0.0805	0.1175	0.0132	0.3967	0.0144	0.1077	0.1859	0.3311	0.0717	0.4832	0.069	0.119	0.1156	0.3501	0.0371	0.0378	0.0653	0.0191	0.0691	0.3093	0.2235	0.0072	0.0095	0.0038	0.1195	0.0046	0.3285	0.074	0.3847	0.032	0.4406	0.0488	0.2066	0.0325	0.4689	0.3312	0.0089
CG32017	0.1894	0.4122	0.2389	0.0053	0.339	0.0002	0.4326	0.3937	0.0098	0.0144	0.0295	0.4372	0.006	0.3953	0.0562	0.0353	0.0359	0.3338	0.1263	0.0456	0.2768	0.0069	0.0004	0.3009	0.3656	0.4853	0.2508	0.4393	0.3822	0.4278	0.3851	0.2576	0	0.0282	0.4312	0.0102	0.4393	0.2741	0.066	0.3207	0.3163	0.001	0.1549	0.3318	0.0081	0.0029	0.0457	0.3797	0.077
Snx27	0.0126	0.0992	0.0024	0.3593	0.1184	0.3421	0.086	0.0794	0.2869	0.4127	0.2224	0.0345	0.149	0.0688	0.0006	0.4544	0.0009	0.1116	0.1119	0.1217	0.124	0.3867	0.2675	0.1193	0.1223	0.1317	0.0201	0.0263	0.0855	0.0181	0.0855	0.2073	0.3818	0.001	0.0345	0.0001	0.1092	0.0044	0.1195	0.0847	0.2261	0.0293	0.348	0.0431	0.2263	0.1045	0.4467	0.3154	0.0048
CG31550	0.0453	0.1019	0.0768	0.0626	0.055	0.3178	0.0648	0.0068	0.0531	0.1268	0.4893	0.0504	0.5019	0.079	0.1631	0.4918	0.0889	0.0542	0.0013	0.0237	0.1326	0.0704	0.3137	0.0216	0.0025	0.2366	0.1121	0.034	0.0059	0.0259	0.004	0.1885	0.2782	0.1303	0.0232	0.1783	0.0218	0.0699	0.0084	0.0122	0.0778	0.3577	0.5139	0.0623	0.4122	0.3694	0.0658	0.4681	0.0806
wun	0.4363	0.0718	0.2365	0.0904	0.3772	0.1156	0.3563	0.2762	0.0873	0.3459	0.2193	0.3094	0.2942	0.1645	0.362	0.0524	0.1518	0.1708	0.4081	0.4467	0.262	0.1583	0.2062	0.3678	0.2976	0.3858	0.1595	0.1353	0.2859	0.4318	0.3079	0.4466	0.0989	0.2126	0.4146	0.1469	0.14	0.2918	0.417	0.3035	0.264	0.3674	0.0396	0.258	0.0187	0.2193	0.2559	0.3008	0.3128
CG5938	0.3343	0.0503	0.1042	0.0157	0.0028	0.1069	0.1621	0.0278	0.0409	0.0102	0.1317	0.0237	0.2346	0.0398	0.3821	0.318	0.2701	0.0443	0.0147	0.0448	0.1017	0.0564	0.1407	0.0067	0.0113	0.2135	0.1063	0.0739	0.0249	0.0856	0.0222	0.444	0.0824	0.4793	0.075	0.3752	0.0202	0.1677	0.0039	0.0207	0.3974	0.2042	0.2398	0.2022	0.2929	0.1777	0.0046	0.1575	0.4
stmA	0.0737	0.0915	0.2836	0.2386	0.3573	0.456	0.2203	0.2971	0.2345	0.4325	0.3727	0.4538	0.3338	0.29	0.275	0.2451	0.4777	0.4866	0.3521	0.3654	0.3885	0.2319	0.2271	0.4598	0.3935	0.3404	0.5181	0.4308	0.3044	0.1609	0.2934	0.2423	0.4354	0.2449	0.1459	0.3633	0.3468	0.0905	0.4674	0.2881	0.4962	0.1663	0.0069	0.31	0.2989	0.188	0.4965	0.3493	0.1844
Ucp4A	0.1004	0.2621	0.2059	0.2722	0.2067	0.4552	0.3916	0.0827	0.4459	0.1675	0.3009	0.1091	0.4313	0.4639	0.3561	0.4339	0.381	0.1693	0.0473	0.415	0.0184	0.1535	0.3164	0.296	0.1779	0.1201	0.3358	0.1256	0.0839	0.119	0.123	0.4513	0.4385	0.368	0.0679	0.2937	0.2684	0.1179	0.1232	0.0309	0.3054	0.2996	0.2814	0.4819	0.4441	0.3723	0.1212	0.112	0.3609
[truncated: 290 more columns]

## Sheet: cor_coef_pvalue_SD_outliers
ID	snRNA:U2:38ABa	alpha-Est9	PrBP	DIP-alpha	CR41620	CG7985	l(1)G0469	Spase25	asRNA:CR44690	Lar	r	snoRNA:Psi28S-3342	CR14033	JHDM2	mRpS16	Pect	mrt	CG7966	CG11790	Dhc36C	Tep4	lncRNA:CR31044	CG7766	CG1275	CG7997	CG13698	chk	Arp1	Smox	CG4615	CG15111	scrib	sky	CG4593	Vps13	fra	CG12991	Dp1	stw	CG8613	Rcd5	papi	CG42354	mmy	CG14715	Usp15-31	brwl	sinu	Muted
snRNA:U2:38ABa	1	0.0580796	-0.0537872	-0.035617	0.1051	0.39918	-0.382192	0.261956	-0.301426	0.0920019	0.237743	0.642644	0.20063	0.274775	0.166052	0.247825	0.117762	0.538443	0.290108	0.402064	-0.27316	-0.0980572	0.0365209	0.29231	0.570032	-0.0840586	0.166427	0.461513	-0.163427	0.184553	0.307425	0.127094	-0.17652	0.213506	-0.0400262	0.793398	0.0397984	0.0694342	-0.254065	0.38112	0.176071	0.353861	-0.0035745	0.0467776	0.41004	0.325615	-0.00973087	-0.512026	-0.136221
alpha-Est9	0.4334	1	-0.224025	0.0545928	0.692292	-0.601056	0.0186802	-0.25236	-0.0825518	-0.130373	-0.505536	0.221242	-0.457354	-0.693521	-0.73296	-0.407533	-0.405407	0.588278	-0.828889	-0.512969	0.224478	0.247955	0.656796	-0.491469	-0.337211	-0.530786	-0.307224	-0.725312	0.355829	-0.290938	-0.140376	-0.421161	-0.0039884	-0.722388	-0.180535	-0.230058	-0.509743	-0.311098	0.357875	0.133912	-0.683339	-0.217862	0.0202339	-0.19839	-0.774405	-0.515636	-0.361098	-0.293089	-0.200058
PrBP	0.4385	0.2848	1	-0.0419788	0.267582	0.0168866	-0.280035	0.600602	-0.726076	-0.463157	0.219605	-0.141314	0.171665	-0.0523164	0.532073	-0.121025	0.455839	-0.0868088	0.347548	-0.345684	-0.297978	-0.804548	-0.402845	0.581222	0.482973	-0.0972596	-0.515603	0.338966	-0.481594	-0.293365	-0.501496	-0.124912	-0.497604	0.506261	-0.729112	-0.24389	-0.00303649	-0.416893	-0.615167	-0.526935	0.458865	0.0350197	-0.230693	0.481754	0.530182	0.0471276	-0.0598597	-0.311846	0.410891
DIP-alpha	0.4708	0.4483	0.4634	1	0.398276	-0.247883	0.45926	-0.544648	-0.199217	0.638933	-0.258924	0.640288	-0.694622	0.428031	-0.0223367	0.51017	0.39787	-0.199289	0.055709	0.235364	-0.129069	0.428111	0.317207	0.0560687	-0.502011	0.727261	0.604771	-0.365717	0.634391	-0.281804	0.239071	0.493874	0.700268	0.107044	0.500549	0.116859	-0.252332	0.0950837	0.281862	-0.245864	0.318238	0.27597	0.649347	-0.110187	-0.0144594	0.601275	0.780868	0.689733	-0.578206
CR41620	0.396	0.0277	0.2557	0.161	1	-0.605421	-0.0305489	-0.277287	-0.681167	0.0289263	-0.319921	0.430847	-0.420467	-0.238424	-0.184309	0.124721	-0.0505877	0.523725	-0.409102	-0.214283	-0.134466	0.108016	0.370654	-0.0617716	-0.136	-0.161865	-0.242635	-0.436667	0.3513	-0.220082	-0.136768	-0.0897845	0.146176	-0.256793	-0.168943	-0.130088	-0.332887	-0.320277	0.251825	-0.0734324	-0.169657	0.0671367	0.364294	0.321206	-0.234724	0.0659067	0.0479141	-0.124186	0.0195035
CG7985	0.1734	0.0404	0.5157	0.2856	0.0416	1	-0.0445935	0.230793	0.292355	-0.0302191	0.68383	0.184307	0.708993	0.360542	0.667987	0.0805678	0.391281	-0.235801	0.373579	0.318584	-0.493017	-0.430644	-0.353875	-0.00798724	0.270264	0.211055	0.166647	0.781356	-0.234859	0.005234	-0.0187119	0.272433	-0.379062	0.76733	-0.0730073	0.215479	0.159034	-0.175375	-0.68644	-0.202163	0.636174	-0.301537	0.0329471	0.274665	0.585373	0.224341	0.068752	-0.109765	-0.234857
l(1)G0469	0.1821	0.4828	0.2847	0.1388	0.4862	0.5318	1	-0.611178	0.302418	0.707713	0.311677	0.263184	-0.154642	-0.0939072	-0.126369	0.0387497	0.524858	-0.703793	-0.327482	-0.106665	0.419738	0.352812	0.681327	-0.419638	-0.67118	0.212428	0.610527	-0.481496	0.824073	0.0731781	0.451043	0.686071	0.604185	-0.0231712	0.342743	-0.359907	0.262336	-0.334194	0.056782	-0.0196763	0.266824	-0.225881	0.627564	-0.063697	-0.336947	0.159886	0.677295	0.482783	-0.362448
Spase25	0.2674	0.2689	0.0593	0.0781	0.2612	0.2744	0.0146	1	-0.281514	-0.67935	0.135186	-0.378179	0.302932	-0.164641	0.193467	-0.448936	0.102086	0.0936383	0.452016	-0.305066	-0.00730989	-0.782359	-0.468761	0.635421	0.803784	-0.403905	-0.522461	0.492076	-0.893633	-0.0999263	-0.347847	-0.442453	-0.766976	0.222555	-0.724731	0.155427	0.0479255	-0.0484391	-0.617698	-0.0813903	0.0663792	0.172962	-0.83769	-0.090149	0.43082	-0.304528	-0.5081	-0.670652	0.410763
asRNA:CR44690	0.2392	0.4319	0.0238	0.3225	0.0292	0.2457	0.2204	0.2453	1	0.0750925	-0.0702897	-0.261437	0.0603833	-0.116831	-0.322163	-0.295567	-0.284026	-0.316373	-0.304494	-0.0126926	0.19564	0.319409	0.113665	-0.625405	-0.516277	0.0894582	0.249772	-0.166981	0.177872	-0.0596072	0.0517401	-0.0724735	0.0799566	-0.2117	0.375755	-0.18413	-0.113855	0.160382	0.163301	0.0262482	-0.269948	-0.457864	-0.0851008	-0.486421	-0.451153	-0.363603	-0.132966	0.334623	-0.446761
Lar	0.4326	0.382	0.1343	0.0418	0.4959	0.4435	0.0424	0.0337	0.4381	1	0.230039	0.567909	-0.232008	0.468285	-0.0205205	0.635619	0.390463	-0.37579	0.100177	0.546484	0.274525	0.685678	0.506678	-0.0645463	-0.369436	0.502409	0.93486	-0.21836	0.77363	0.451458	0.848846	0.883754	0.897349	0.0132316	0.764965	0.332829	0.434449	0.215535	0.354774	0.394098	0.308709	0.364201	0.765048	-0.0748526	-0.00155828	0.684716	0.882145	0.540674	-0.300713
r	0.2872	0.102	0.2919	0.2628	0.214	0.0192	0.2571	0.3709	0.4321	0.3232	1	0.152357	0.804445	0.148415	0.663361	0.124725	0.656858	-0.441574	0.282194	0.179522	-0.0606654	-0.401537	-0.0135066	0.0860715	0.329836	-0.0847902	0.206695	0.578007	0.0155091	0.415839	0.305983	0.613618	-0.156086	0.645571	-0.189103	0.0319977	0.676802	-0.435428	-0.665792	0.0717956	0.71055	-0.160048	0.25913	0.548175	0.539181	0.302068	0.306838	-0.260794	0.21699
snoRNA:Psi28S-3342	0.0443	0.2989	0.371	0.046	0.144	0.3433	0.2764	0.1773	0.2644	0.0689	0.3559	1	-0.210879	0.315242	0.106758	0.439829	0.427948	0.203149	-0.0317014	0.33252	-0.297922	0.22452	0.456618	-0.0602351	-0.130855	0.331959	0.528096	-0.0160963	0.552287	-0.0983162	0.373174	0.518588	0.349901	0.235429	0.269802	0.435842	-0.153407	-0.179743	-0.0586387	0.0473588	0.379165	0.148602	0.646308	0.116475	0.134624	0.560297	0.551498	0.084049	-0.592646
CR14033	0.3023	0.122	0.3326	0.023	0.1532	0.0287	0.4187	0.2236	0.4356	0.2722	0.0071	0.3072	1	0.0371676	0.637638	-0.029991	0.14889	-0.101065	0.213038	0.155302	-0.248436	-0.500635	-0.374679	-0.0187938	0.476359	-0.296143	-0.223637	0.739688	-0.362348	0.386601	-0.0368497	0.125743	-0.510286	0.525723	-0.323729	-0.023599	0.508532	-0.296103	-0.582068	0.0632317	0.385982	-0.328964	-0.0765878	0.602926	0.491674	-0.00991489	-0.223474	-0.449819	0.424379
JHDM2	0.253	0.0271	0.4612	0.1442	0.2786	0.1825	0.3449	0.3374	0.3998	0.1239	0.3687	0.2323	0.4827	1	0.573625	0.881971	0.217239	-0.140784	0.771889	0.89983	-0.433475	0.242876	-0.479011	0.452286	0.175464	0.831249	0.586149	0.545174	-0.0136706	0.288338	0.359302	0.528118	0.420159	0.553175	0.614596	0.624804	0.258962	0.59165	0.104081	0.0440295	0.561637	0.522991	0.372683	0.162709	0.701005	0.892184	0.594661	0.509799	-0.09467
mRpS16	0.3506	0.0225	0.081	0.4705	0.3213	0.0199	0.3533	0.3241	0.2206	0.4779	0.0373	0.4008	0.0398	0.0763	1	0.452431	0.513032	-0.25303	0.609484	0.40619	-0.658951	-0.51379	-0.613706	0.355941	0.393097	0.383328	0.00909718	0.831648	-0.269442	0.0875228	-0.131963	0.385578	-0.234173	0.946195	-0.140849	0.0850235	0.312595	-0.170569	-0.592978	-0.37742	0.859731	-0.0508287	0.246693	0.751112	0.883121	0.563079	0.289975	0.0370532	0.198774
Pect	0.3044	0.1686	0.4353	0.0839	0.411	0.4476	0.5745	0.1771	0.238	0.0904	0.3989	0.1408	0.3976	0.0064	0.1436	1	0.134561	0.0123607	0.522917	0.89923	-0.332196	0.46241	-0.219629	0.29629	0.0489779	0.697636	0.588056	0.310888	0.274096	0.448857	0.498023	0.623343	0.62777	0.343958	0.687706	0.548331	0.339078	0.491544	0.342258	0.218608	0.430755	0.537024	0.643578	0.344458	0.515591	0.933964	0.666961	0.488995	0.0216669
mrt	0.4031	0.1732	0.1329	0.1663	0.4275	0.1322	0.0365	0.4382	0.2547	0.1638	0.0365	0.1509	0.4037	0.2744	0.1115	0.3105	1	-0.630582	0.335872	-0.0219962	-0.038075	-0.379834	0.177907	0.307733	0.0754857	0.284541	0.401551	0.225394	0.216377	-0.0655964	0.224489	0.694518	0.0927995	0.660289	-0.163701	-0.0162976	0.312296	-0.461365	-0.648256	-0.292662	0.854591	0.0408848	0.35318	0.245954	0.473228	0.461267	0.673907	0.0797907	-0.178744
CG7966	0.0829	0.0594	0.4162	0.3275	0.0868	0.2899	0.007	0.4009	0.2212	0.1884	0.1405	0.3141	0.4249	0.3557	0.2818	0.4933	0.0607	1	-0.223175	0.0625758	-0.302498	0.0718682	-0.0556004	-0.03737	0.290535	-0.35675	-0.441351	0.0102815	-0.227966	-0.0645844	-0.21305	-0.559641	-0.281432	-0.351409	-0.145133	0.342866	-0.420741	0.1314	0.271342	0.248776	-0.521534	0.117505	-0.1886	0.0627211	-0.12576	-0.176486	-0.560117	-0.485241	0.0770963
CG11790	0.2598	0.0009	0.2109	0.4366	0.1507	0.1481	0.1927	0.1554	0.2402	0.413	0.2653	0.483	0.2924	0.0056	0.0408	0.0531	0.1858	0.292	1	0.594773	-0.207837	-0.223593	-0.651668	0.855154	0.645468	0.469934	0.270819	0.722746	-0.510034	0.329116	0.229007	0.312681	0.0115384	0.58741	0.128718	0.606353	0.439602	0.5085	-0.253683	0.0711937	0.562417	0.652475	-0.159982	0.0775339	0.877189	0.636249	0.318626	0.0783937	0.290248
Dhc36C	0.1667	0.1083	0.2113	0.301	0.2896	0.1943	0.2831	0.2397	0.4859	0.1009	0.3449	0.2121	0.3923	0.0029	0.1645	0.0107	0.5323	0.4561	0.033	1	-0.294894	0.459367	-0.320086	0.258729	0.184684	0.609881	0.609482	0.488796	0.085131	0.563391	0.560861	0.522345	0.481131	0.316562	0.730305	0.728872	0.393029	0.651764	0.29589	0.39311	0.326338	0.51791	0.418635	0.165376	0.533904	0.812899	0.471572	0.358715	-0.00107733
Tep4	0.2433	0.2908	0.2363	0.385	0.3786	0.0966	0.151	0.4969	0.3212	0.2597	0.4363	0.2358	0.2734	0.1424	0.0396	0.2307	0.462	0.2335	0.3341	0.2539	1	0.340554	0.56825	0.00163388	-0.0952064	-0.420506	0.219256	-0.565645	0.204239	0.427546	0.52232	0.107377	0.334966	-0.664963	0.0927946	-0.0635194	0.434927	0.124657	0.310844	0.592569	-0.442181	0.274318	-0.213531	-0.56206	-0.511262	-0.315372	0.0422571	-0.0972037	0.249448
lncRNA:CR31044	0.4158	0.2698	0.008	0.1412	0.4028	0.1353	0.1986	0.009	0.2175	0.0297	0.1586	0.2915	0.1034	0.2779	0.0972	0.1257	0.179	0.4358	0.2888	0.1246	0.2049	1	0.421617	-0.328467	-0.53934	0.31993	0.618237	-0.526127	0.650791	0.369365	0.610245	0.29556	0.859346	-0.560791	0.887752	0.261731	0.0749928	0.559208	0.895904	0.528063	-0.400468	0.309835	0.474712	-0.365811	-0.467989	0.270247	0.373925	0.560418	-0.250512
CG7766	0.441	0.0408	0.1735	0.2257	0.1929	0.1642	0.1026	0.1026	0.3896	0.0859	0.4832	0.1348	0.1717	0.1337	0.0623	0.2383	0.3521	0.4739	0.0158	0.1977	0.0763	0.1511	1	-0.468366	-0.494305	-0.279181	0.3574	-0.734417	0.764842	0.0234633	0.449947	0.298382	0.429645	-0.511068	0.132574	-0.134904	-0.00889951	-0.364226	0.217365	0.313861	-0.246083	-0.100907	0.382755	-0.295213	-0.663209	-0.157998	0.272063	-0.0250451	-0.371575
CG1275	0.259	0.0956	0.0372	0.4388	0.471	0.5614	0.069	0.0698	0.0336	0.3968	0.4333	0.4536	0.5539	0.1055	0.1882	0.1797	0.2144	0.4697	0.0257	0.2591	0.4959	0.2159	0.0866	1	0.755704	0.161691	0.0229275	0.464079	-0.573496	0.231151	0.136303	0.102081	-0.0819052	0.322839	-0.166081	0.525537	0.339693	0.373959	-0.229362	0.114715	0.342845	0.779084	-0.344152	-0.00584522	0.708536	0.430734	0.164056	-0.184743	0.453305
CG7997	0.0732	0.2024	0.1049	0.1011	0.3797	0.2756	0.0118	0.0089	0.0951	0.1888	0.2079	0.3738	0.1197	0.3473	0.1645	0.4482	0.4378	0.244	0.039	0.342	0.4043	0.0835	0.1099	0.0128	1	-0.317686	-0.299259	0.70537	-0.776756	0.364719	0.0310878	-0.130873	-0.517527	0.29804	-0.446769	0.530376	0.387893	0.150342	-0.436634	0.29442	0.183189	0.47408	-0.523807	0.199789	0.680662	0.119192	-0.296463	-0.697104	0.613586
CG13698	0.4211	0.0871	0.4096	0.0173	0.3482	0.3093	0.2943	0.1629	0.4206	0.0942	0.4199	0.2147	0.2356	0.0089	0.1766	0.0468	0.2429	0.1865	0.1165	0.0639	0.1492	0.2199	0.2359	0.34	0.2282	1	0.621562	0.166596	0.268587	-0.133368	0.149672	0.481341	0.543963	0.468274	0.655944	0.245742	-0.0902399	0.414559	0.170938	-0.325554	0.519947	0.236669	0.499686	-0.0035797	0.375176	0.737884	0.700511	0.846516	-0.463479
chk	0.342	0.2257	0.0964	0.0527	0.2754	0.3644	0.0322	0.1007	0.2767	0.0006	0.3181	0.0901	0.2835	0.0687	0.4765	0.0974	0.1734	0.1356	0.2649	0.0731	0.3035	0.0516	0.1871	0.5172	0.2443	0.0469	1	-0.0722023	0.604383	0.367711	0.816213	0.827734	0.804868	0.112215	0.79699	0.466779	0.366025	0.358446	0.253829	0.341315	0.356067	0.39532	0.58889	-0.27018	0.0983948	0.677134	0.842686	0.576296	-0.436974
Arp1	0.1294	0.0226	0.2015	0.1804	0.1418	0.0078	0.1082	0.1098	0.3426	0.3065	0.0687	0.4843	0.0224	0.0759	0.0057	0.239	0.3103	0.4789	0.0204	0.1022	0.0709	0.0919	0.014	0.1361	0.0258	0.3544	0.4293	1	-0.607933	0.231759	-0.0697721	0.126807	-0.453903	0.779711	-0.172301	0.417286	0.325344	0.0991994	-0.578378	-0.0691001	0.594911	0.103214	-0.155918	0.468523	0.893822	0.381362	-0.0514541	-0.266259	0.273426
Smox	0.3699	0.1987	0.1214	0.0457	0.2062	0.29	0.0178	0.0004	0.3345	0.0189	0.4953	0.0765	0.1828	0.4637	0.2621	0.2645	0.311	0.2972	0.0759	0.4425	0.3165	0.0414	0.0278	0.0537	0.0087	0.2579	0.0483	0.0484	1	0.0380912	0.458334	0.582336	0.751988	-0.214068	0.544581	-0.178803	0.00254504	-0.206433	0.398665	0.0901734	0.0452705	-0.155583	0.840716	-0.000114591	-0.471333	0.265724	0.631045	0.516801	-0.499119
CG4615	0.3385	0.2333	0.2357	0.2466	0.2884	0.5354	0.4986	0.4096	0.4414	0.1456	0.1595	0.4088	0.1757	0.2445	0.4051	0.1664	0.4709	0.4234	0.2282	0.0838	0.1423	0.1835	0.5134	0.3274	0.1786	0.3822	0.1902	0.278	0.4834	1	0.767627	0.466529	0.368238	-0.114172	0.382097	0.452496	0.893415	0.40748	0.273117	0.837969	0.000651507	0.503846	0.139391	0.132528	0.224592	0.356768	0.2128	-0.125657	0.587833
CG15111	0.2244	0.3594	0.1046	0.2786	0.3734	0.5014	0.1599	0.2029	0.4508	0.0018	0.231	0.178	0.4643	0.1887	0.3771	0.089	0.3163	0.3064	0.3021	0.0582	0.0966	0.0547	0.1478	0.3673	0.4645	0.3624	0.0053	0.4407	0.137	0.0108	1	0.740254	0.70681	-0.154483	0.628667	0.575748	0.685097	0.372057	0.323301	0.785323	0.105792	0.576572	0.403552	-0.206897	0.0509876	0.526732	0.606312	0.142972	0.0231595
scrib	0.378	0.1448	0.387	0.103	0.4031	0.2562	0.0297	0.1413	0.4295	0.004	0.0529	0.0981	0.3899	0.0948	0.1702	0.0667	0.0359	0.0695	0.2271	0.0987	0.4017	0.2483	0.2359	0.4184	0.3798	0.1097	0.0088	0.385	0.0595	0.1186	0.0154	1	0.649679	0.411257	0.500093	0.255905	0.618339	-0.0185325	-0.0618537	0.212253	0.676694	0.262985	0.740427	0.236139	0.347139	0.768307	0.915705	0.394768	-0.136136
sky	0.3394	0.4883	0.1106	0.0237	0.3816	0.1773	0.0339	0.0195	0.4295	0.0024	0.3531	0.1963	0.0949	0.1523	0.2979	0.0853	0.3759	0.2436	0.5255	0.139	0.2045	0.0022	0.1367	0.3619	0.0925	0.0796	0.0099	0.1321	0.0096	0.1803	0.0215	0.0463	1	-0.249011	0.856001	0.212363	0.266811	0.41927	0.68225	0.354489	0.0233848	0.427632	0.677589	-0.202158	-0.203711	0.571602	0.769764	0.713457	-0.227652
CG4593	0.3093	0.0226	0.1017	0.4168	0.2619	0.0026	0.3981	0.3164	0.3089	0.4875	0.0437	0.2991	0.0765	0.0998	0.0009	0.1799	0.0678	0.1934	0.0365	0.2023	0.0349	0.0776	0.1265	0.2012	0.2379	0.1304	0.378	0.0091	0.2818	0.4065	0.3612	0.1573	0.2827	1	-0.155598	0.0890848	0.163253	-0.243535	-0.713834	-0.503193	0.932275	-0.112297	0.230004	0.577914	0.842705	0.535865	0.359132	0.0898105	-0.0690181
Vps13	0.4534	0.3327	0.01	0.0976	0.3267	0.368	0.1889	0.0276	0.1831	0.033	0.3286	0.2652	0.223	0.0693	0.3877	0.1022	0.3643	0.3361	0.4149	0.0549	0.4218	0.0013	0.417	0.2734	0.1393	0.0441	0.015	0.3453	0.0678	0.1866	0.0345	0.115	0.0073	0.3741	1	0.398159	0.175999	0.662077	0.698412	0.374036	-0.0288268	0.347984	0.54632	-0.258246	-0.097841	0.557108	0.575014	0.7401	-0.327155
fra	0.0129	0.2888	0.2731	0.3802	0.392	0.3049	0.1847	0.3455	0.3299	0.2058	0.4818	0.1352	0.4867	0.038	0.4298	0.0377	0.4403	0.2142	0.0654	0.0047	0.4356	0.2597	0.3975	0.121	0.094	0.2696	0.1135	0.1533	0.3446	0.1279	0.0742	0.2706	0.3166	0.4488	0.1554	1	0.250278	0.628522	0.131585	0.587955	0.102481	0.75756	-0.0247075	-0.218645	0.461754	0.561488	0.207026	-0.126892	-0.0248065
CG12991	0.465	0.0924	0.5012	0.2693	0.2045	0.3774	0.3171	0.4518	0.4018	0.1457	0.036	0.3666	0.1006	0.2754	0.2238	0.2175	0.2408	0.1513	0.1485	0.1706	0.139	0.4336	0.4848	0.2389	0.1615	0.4156	0.1942	0.2101	0.498	0.0025	0.0313	0.0504	0.2714	0.3606	0.351	0.275	1	0.154423	-0.0678739	0.587542	0.318828	0.391621	0.139046	0.241526	0.387506	0.379322	0.359687	-0.107237	0.606813
Dp1	0.4439	0.2206	0.1335	0.4023	0.2221	0.3763	0.2338	0.4582	0.3358	0.2995	0.1306	0.3285	0.2497	0.0499	0.3381	0.0646	0.1475	0.3792	0.1239	0.0132	0.3905	0.0769	0.1875	0.233	0.3602	0.1548	0.1943	0.3948	0.335	0.1567	0.1639	0.4831	0.1585	0.2744	0.0216	0.048	0.3583	1	0.624396	0.465197	-0.273334	0.692067	-0.172723	-0.452832	0.132059	0.332929	0.0817677	0.357402	0.112392
stw	0.2721	0.1962	0.0534	0.2463	0.2803	0.0207	0.3964	0.0387	0.3528	0.1892	0.0318	0.4521	0.0493	0.4147	0.0641	0.194	0.063	0.259	0.2643	0.2286	0.2325	0.0005	0.2847	0.2829	0.1445	0.3505	0.2699	0.0662	0.1606	0.2556	0.2198	0.4313	0.0205	0.0391	0.0168	0.3571	0.4397	0.0603	1	0.446876	-0.635724	0.333038	0.22518	-0.339662	-0.525198	0.0696197	0.0802581	0.459264	-0.00447888
CG8613	0.1766	0.3761	0.0885	0.2787	0.4289	0.3331	0.4874	0.4228	0.477	0.1677	0.4394	0.452	0.4384	0.4582	0.1753	0.3209	0.2517	0.2834	0.4457	0.1724	0.0663	0.0889	0.2422	0.4046	0.2346	0.2207	0.2129	0.4354	0.4175	0.005	0.0112	0.3084	0.198	0.0969	0.1868	0.0615	0.0642	0.1183	0.1331	1	-0.385305	0.559012	-0.0331791	-0.2641	-0.122473	0.107524	0.0100829	-0.283131	0.349359
Rcd5	0.3399	0.0378	0.135	0.2213	0.3229	0.014	0.2622	0.4767	0.2649	0.2117	0.025	0.1809	0.1654	0.1102	0.0039	0.1575	0.0155	0.106	0.036	0.1781	0.1471	0.1662	0.2276	0.1684	0.3391	0.1075	0.1999	0.0545	0.5	0.4834	0.4154	0.0449	0.4409	0.0013	0.5213	0.4369	0.2295	0.2568	0.0746	0.1769	1	0.0171129	0.424008	0.518302	0.772215	0.671621	0.636634	0.19657	-0.106952
papi	0.2134	0.3382	0.4795	0.2395	0.4127	0.1649	0.3118	0.3073	0.1359	0.147	0.3547	0.3713	0.2036	0.0652	0.4392	0.0179	0.5105	0.3525	0.1146	0.0405	0.2714	0.2283	0.4415	0.0931	0.1295	0.2648	0.1507	0.4027	0.3537	0.0714	0.0712	0.2442	0.1161	0.3246	0.1906	0.0225	0.1992	0.025	0.1735	0.0732	0.5956	1	-0.0744567	-0.268284	0.363392	0.551422	0.341088	0.0307417	0.301597
CG42354	0.4961	0.4988	0.3051	0.0359	0.1898	0.5067	0.0122	0.0071	0.4194	0.0297	0.2696	0.0367	0.3954	0.1823	0.2772	0.1051	0.1913	0.3148	0.3059	0.1531	0.3115	0.1136	0.1645	0.166	0.0929	0.1016	0.076	0.3532	0.0007	0.3585	0.1612	0.0213	0.0424	0.2674	0.1044	0.4461	0.3838	0.3279	0.3003	0.476	0.1672	0.3583	1	0.435376	0.0168957	0.636387	0.757594	0.539563	-0.342203
mmy	0.4412	0.3305	0.1007	0.4122	0.2198	0.1969	0.5337	0.4589	0.1123	0.3762	0.0678	0.3882	0.077	0.373	0.0054	0.1689	0.285	0.409	0.3469	0.3758	0.0619	0.1873	0.2437	0.588	0.3185	0.4837	0.2355	0.1318	0.5347	0.4053	0.3369	0.2813	0.2815	0.0304	0.227	0.3227	0.291	0.1272	0.1948	0.271	0.0321	0.2889	0.1244	1	0.486525	0.321904	0.0983922	-0.13802	0.372682
CG14715	0.1623	0.0146	0.0826	0.4818	0.2864	0.0544	0.2284	0.1426	0.1244	0.4914	0.0835	0.3712	0.1117	0.0259	0.002	0.0928	0.1221	0.3781	0.0011	0.0847	0.0917	0.123	0.0344	0.0134	0.0317	0.1831	0.4083	0.0016	0.121	0.3023	0.4456	0.1968	0.3099	0.0019	0.4081	0.124	0.1623	0.3749	0.0863	0.3754	0.0096	0.208	0.482	0.1076	1	0.651085	0.276466	-0.0890742	0.281238
Usp15-31	0.222	0.0967	0.4447	0.0479	0.4665	0.2965	0.3688	0.2365	0.196	0.045	0.249	0.0697	0.4488	0.0052	0.0786	0.0031	0.144	0.3106	0.0271	0.0292	0.2336	0.2634	0.2923	0.0971	0.3972	0.0246	0.0506	0.1829	0.2636	0.2068	0.0753	0.0158	0.0836	0.1223	0.1099	0.0523	0.1813	0.2215	0.4609	0.4115	0.086	0.0452	0.0793	0.1941	0.0365	1	0.812823	0.443624	-0.0734568
brwl	0.488	0.1852	0.4455	0.0108	0.4729	0.4679	0.0128	0.108	0.3754	0.0025	0.2311	0.0793	0.2833	0.0697	0.2388	0.0565	0.0478	0.0721	0.2274	0.1311	0.4651	0.1866	0.2639	0.378	0.2417	0.0263	0.0075	0.4465	0.038	0.3035	0.0573	0.0007	0.0152	0.2025	0.0824	0.3131	0.1868	0.4285	0.4473	0.4927	0.0664	0.2008	0.0214	0.438	0.2605	0.0073	1	0.631471	-0.296333
sinu	0.093	0.2463	0.2395	0.0322	0.3891	0.3953	0.1324	0.028	0.211	0.0703	0.2713	0.4244	0.1178	0.0832	0.4799	0.1064	0.4381	0.0943	0.4121	0.1798	0.4282	0.0787	0.492	0.3112	0.0261	0.005	0.0583	0.2613	0.0917	0.3698	0.3675	0.17	0.0163	0.4397	0.0111	0.4	0.3988	0.2086	0.1248	0.2577	0.3259	0.4462	0.0703	0.3665	0.4169	0.1271	0.0395	1	-0.437063
Muted	0.3668	0.3177	0.1481	0.0666	0.4776	0.3146	0.2013	0.1543	0.1256	0.2412	0.3033	0.0631	0.1347	0.3911	0.3167	0.5288	0.333	0.4098	0.2556	0.465	0.2752	0.2766	0.1799	0.1571	0.0548	0.132	0.1436	0.2498	0.0939	0.0585	0.471	0.3734	0.2772	0.4148	0.2183	0.4958	0.0588	0.3801	0.5165	0.2031	0.3735	0.2522	0.2095	0.1976	0.2435	0.3966	0.2327	0.1447	1
CR40743	0.2001	0.3951	0.0329	0.176	0.4967	0.2399	0.5218	0.0651	0.3899	0.1239	0.4688	0.0678	0.5697	0.0801	0.2882	0.1027	0.4349	0.3073	0.3971	0.0304	0.1847	0.0497	0.4093	0.1857	0.3274	0.0975	0.106	0.3488	0.1249	0.2373	0.0964	0.1442	0.1097	0.2937	0.0541	0.0387	0.4554	0.0954	0.1301	0.2712	0.2289	0.3138	0.1005	0.3735	0.3566	0.1155	0.148	0.1354	0.2612
Dys	0.4584	0.1478	0.2093	0.1406	0.3025	0.154	0.0065	0.0491	0.2917	0.0144	0.0872	0.1484	0.3328	0.0963	0.1649	0.1026	0.1401	0.0817	0.4029	0.0963	0.4088	0.1727	0.3443	0.2315	0.1763	0.0627	0.0174	0.386	0.0294	0.1991	0.0691	0.0026	0.057	0.1678	0.0689	0.4387	0.1365	0.4606	0.4792	0.4432	0.1025	0.3882	0.0112	0.23	0.3099	0.0552	0.0106	0.0565	0.246
LTV1	0.4943	0.4384	0.448	0.381	0.4608	0.5123	0.1113	0.4731	0.4784	0.0863	0.1058	0.3268	0.4225	0.2084	0.3025	0.2281	0.02	0.08	0.3862	0.211	0.0215	0.4239	0.0643	0.558	0.4065	0.2443	0.1205	0.2291	0.135	0.231	0.0667	0.0611	0.2212	0.3272	0.392	0.4778	0.0811	0.1797	0.3226	0.2251	0.362	0.3107	0.3136	0.3855	0.3409	0.5508	0.1228	0.3982	0.5352
CR41597	0.1266	0.3726	0.3399	0.0743	0.3901	0.4112	0.3075	0.4803	0.4622	0.2949	0.178	0.1098	0.0972	0.0957	0.4424	0.2347	0.3742	0.4043	0.1401	0.193	0.2832	0.309	0.3814	0.2077	0.4997	0.058	0.1268	0.4231	0.442	0.236	0.3744	0.4332	0.2816	0.3526	0.1863	0.0321	0.1669	0.1087	0.4332	0.4518	0.3435	0.0888	0.5094	0.1091	0.3119	0.1746	0.2427	0.23	0.0566
ytr	0.438	0.0662	0.1052	0.4951	0.3943	0.0217	0.3659	0.419	0.3107	0.3613	0.0996	0.4189	0.0711	0.1285	0.0005	0.2278	0.2007	0.3528	0.1726	0.2649	0.0069	0.0933	0.0503	0.4138	0.3263	0.1691	0.3768	0.0254	0.301	0.3368	0.1685	0.3139	0.2182	0.001	0.3468	0.3935	0.4772	0.2503	0.0771	0.0624	0.0123	0.249	0.2623	0.0049	0.0259	0.1635	0.3568	0.4025	0.4724
HIP	0.4685	0.0005	0.2042	0.4574	0.0995	0.1731	0.2677	0.2184	0.4021	0.4744	0.3265	0.2916	0.2816	0.0085	0.0314	0.0972	0.3228	0.2006	0.0001	0.0713	0.1764	0.2903	0.002	0.0371	0.1628	0.0516	0.3509	0.0285	0.1025	0.3691	0.4717	0.3126	0.4762	0.0337	0.362	0.2191	0.2464	0.1094	0.3176	0.2886	0.0699	0.2065	0.3902	0.3567	0.0094	0.0754	0.2687	0.224	0.2887
Zip102B	0.3108	0.2292	0.2314	0.0108	0.5152	0.2431	0.106	0.0621	0.4779	0.0162	0.3345	0.2553	0.1146	0.0407	0.4644	0.0468	0.3177	0.199	0.2207	0.0869	0.4161	0.0201	0.4828	0.4328	0.1755	0.0113	0.0164	0.3208	0.0751	0.2501	0.0689	0.0585	0.0022	0.4514	0.0079	0.25	0.3086	0.0547	0.0466	0.3647	0.2852	0.0445	0.0872	0.3143	0.4268	0.0385	0.0129	0.0011	0.2975
Yippee	0.4309	0.4209	0.2123	0.0891	0.3637	0.4495	0.0505	0.0228	0.4571	0.0026	0.1976	0.0692	0.4099	0.3878	0.4034	0.1423	0.0767	0.159	0.3725	0.2499	0.1952	0.0899	0.0636	0.2564	0.1612	0.31	0.0086	0.2067	0.014	0.1672	0.0028	0.0039	0.0124	0.4068	0.0684	0.3648	0.1625	0.4025	0.2822	0.2188	0.2133	0.2527	0.0078	0.3964	0.37	0.0861	0.0064	0.1742	0.2757
CG7841	0.4381	0.1687	0.2505	0.4436	0.4754	0.3699	0.1131	0.4291	0.3044	0.1672	0.3422	0.3042	0.3663	0.0989	0.0772	0.1329	0.2256	0.2606	0.1096	0.1541	0.0181	0.3511	0.0068	0.2347	0.2871	0.1423	0.2262	0.0751	0.1266	0.4252	0.1401	0.275	0.3272	0.1641	0.3913	0.4359	0.3331	0.1873	0.4671	0.1908	0.2835	0.4773	0.4913	0.1192	0.0859	0.1991	0.3717	0.3041	0.2985
AGO1	0.2878	0.3923	0.2176	0.0024	0.3314	0.2247	0.1189	0.0176	0.4475	0.0498	0.2383	0.1806	0.0948	0.0823	0.4687	0.082	0.4188	0.3135	0.4914	0.1301	0.3479	0.0218	0.461	0.2945	0.0595	0.0078	0.0588	0.2446	0.0299	0.4715	0.2267	0.1226	0.0062	0.4503	0.0171	0.4159	0.4228	0.164	0.0347	0.437	0.3136	0.2924	0.0448	0.4178	0.4568	0.0803	0.0335	0.0002	0.1722
Pfdn4	0.4449	0.0882	0.0809	0.3471	0.433	0.1987	0.201	0.4011	0.1518	0.3351	0.3588	0.4277	0.2713	0.0583	0.0069	0.1032	0.3414	0.4631	0.075	0.1872	0.0044	0.1828	0.0142	0.2013	0.2724	0.089	0.3557	0.0424	0.2265	0.3141	0.1625	0.432	0.3286	0.0157	0.4705	0.4438	0.3949	0.463	0.2645	0.0808	0.0712	0.5199	0.3175	0.0313	0.0225	0.0981	0.3542	0.3122	0.3995
ctp	0.3619	0.2469	0.0933	0.2101	0.3105	0.3368	0.4358	0.0399	0.2134	0.4414	0.0427	0.3891	0.1599	0.2969	0.2622	0.2533	0.0582	0.1848	0.228	0.2469	0.169	0.0603	0.4509	0.0854	0.0676	0.1437	0.433	0.2375	0.237	0.2533	0.332	0.2783	0.2169	0.2533	0.0494	0.4974	0.0723	0.1655	0.0367	0.3757	0.188	0.4035	0.2286	0.429	0.1889	0.4727	0.4491	0.0836	0.1358
Megf8	0.3508	0.1714	0.3276	0.0959	0.4529	0.3362	0.3759	0.3266	0.3423	0.0876	0.2741	0.321	0.1748	0.0057	0.4216	0.0106	0.4537	0.503	0.049	0.011	0.4765	0.0816	0.2524	0.0995	0.403	0.0324	0.0529	0.3891	0.4548	0.1823	0.0946	0.1819	0.0406	0.4745	0.0262	0.0294	0.297	0.0024	0.0971	0.2179	0.3698	0.0062	0.3073	0.2939	0.1894	0.0181	0.083	0.0962	0.4811
Pfas	0.4377	0.4736	0.3854	0.2058	0.4541	0.5922	0.057	0.1465	0.433	0.0202	0.0877	0.2573	0.5896	0.3756	0.3999	0.4821	0.0027	0.0176	0.4	0.3909	0.0719	0.2636	0.113	0.4171	0.263	0.457	0.0188	0.2344	0.0998	0.1787	0.0161	0.0004	0.0588	0.4125	0.3032	0.508	0.0432	0.2934	0.4512	0.2921	0.1723	0.3004	0.0508	0.5724	0.382	0.2408	0.0077	0.2439	0.4813
Phf5a	0.19	0.0162	0.1101	0.3692	0.2476	0.0397	0.248	0.1827	0.2094	0.4866	0.2018	0.3412	0.2384	0.0116	0.0079	0.1154	0.1651	0.365	0.0007	0.1002	0.0502	0.155	0.0261	0.0134	0.0881	0.0755	0.3674	0.0041	0.1365	0.494	0.4339	0.2585	0.3452	0.0037	0.5132	0.1303	0.3569	0.2821	0.1306	0.226	0.0184	0.2293	0.4815	0.2271	0.0004	0.0443	0.2342	0.4116	0.4661
PAPLA1	0.2517	0.2611	0.233	0.3397	0.4407	0.0731	0.0557	0.2811	0.3844	0.458	0.1146	0.3229	0.2127	0.4511	0.0855	0.6026	0.1229	0.1453	0.2908	0.4001	0.1295	0.1751	0.4149	0.222	0.1804	0.2439	0.4871	0.3406	0.2514	0.1533	0.1942	0.2278	0.3865	0.0638	0.3886	0.084	0.3705	0.054	0.1175	0.0216	0.0516	0.046	0.1433	0.0215	0.3357	0.3425	0.2461	0.2615	0.1901
insc	0.4828	0.0274	0.0305	0.5079	0.3841	0.2274	0.393	0.2226	0.0857	0.3712	0.0269	0.4804	0.1101	0.1687	0.0127	0.1497	0.0428	0.1099	0.0349	0.2589	0.3898	0.1225	0.1885	0.0378	0.0925	0.346	0.3993	0.0587	0.2832	0.2059	0.355	0.08	0.4808	0.0362	0.3022	0.4527	0.0332	0.3434	0.0929	0.4008	0.0187	0.248	0.3502	0.0523	0.0074	0.0951	0.1422	0.4398	0.096
Paics	0.4321	0.4051	0.321	0.2521	0.4651	0.2229	0.1183	0.2268	0.4791	0.049	0.2484	0.3136	0.4087	0.2426	0.2046	0.3175	0.0683	0.1013	0.3287	0.2884	0.0037	0.2116	0.0599	0.4879	0.3013	0.3381	0.052	0.1168	0.1057	0.1362	0.0129	0.0553	0.0581	0.1948	0.3353	0.5418	0.0776	0.4398	0.3433	0.1519	0.5691	0.1899	0.1939	0.3487	0.2598	0.46	0.0588	0.3703	0.5438
28SrRNA-Psi:CR45862	0.4579	0.0321	0.4409	0.23	0.1513	0.0059	0.2338	0.229	0.2817	0.1786	0.0964	0.2256	0.1981	0.0314	0.0263	0.1347	0.1358	0.1124	0.1518	0.0932	0.0953	0.4844	0.2308	0.3864	0.3368	0.02	0.1035	0.0924	0.3204	0.4886	0.3646	0.0524	0.3075	0.0161	0.1828	0.4173	0.3204	0.4892	0.2435	0.1967	0.025	0.2935	0.0974	0.1681	0.0888	0.0563	0.0656	0.0751	0.1778
CG12091	0.3451	0.3519	0.2276	0.4252	0.3672	0.087	0.0171	0.5142	0.3961	0.4309	0.0577	0.328	0.2381	0.277	0.2044	0.1851	0.0322	0.0651	0.2827	0.1193	0.415	0.1047	0.2636	0.2331	0.2809	0.5028	0.4212	0.4646	0.2651	0.1956	0.3413	0.1944	0.3242	0.1211	0.1611	0.1093	0.4706	0.0102	0.0333	0.0844	0.0899	0.112	0.255	0.2638	0.4408	0.4776	0.2449	0.523	0.2145
eas	0.2297	0.3119	0.027	0.3113	0.2848	0.1245	0.3214	0.1981	0.0783	0.2113	0.0657	0.3338	0.0581	0.4791	0.0121	0.4849	0.1538	0.3874	0.3631	0.4468	0.0416	0.0147	0.2051	0.3731	0.129	0.3777	0.1425	0.054	0.2393	0.3498	0.1488	0.4528	0.069	0.0189	0.0407	0.3748	0.4624	0.0619	0.0136	0.1357	0.054	0.2886	0.4196	0.0008	0.0538	0.3669	0.4201	0.1514	0.2847
CG43367	0.3325	0.1158	0.2783	0.0377	0.3838	0.4548	0.2823	0.1853	0.4346	0.0213	0.4857	0.1556	0.2533	0.0045	0.2848	0.0192	0.2581	0.2942	0.0436	0.0189	0.4254	0.0607	0.3489	0.1432	0.4698	0.0186	0.0137	0.3703	0.2344	0.1904	0.0297	0.039	0.0215	0.264	0.0258	0.0236	0.2316	0.0126	0.1599	0.272	0.1829	0.0166	0.1237	0.3439	0.1746	0.01	0.0188	0.0382	0.3409
bmm	0.446	0.4152	0.2173	0.2021	0.4666	0.3974	0.1048	0.1283	0.4354	0.0019	0.2175	0.1915	0.42	0.4063	0.2407	0.4032	0.0744	0.1408	0.3765	0.4811	0.038	0.1458	0.0499	0.446	0.286	0.4786	0.0058	0.1615	0.0728	0.098	0.0007	0.0114	0.0226	0.2487	0.1582	0.3606	0.0769	0.5051	0.3007	0.1049	0.4718	0.1813	0.085	0.3585	0.3115	0.238	0.0228	0.308	0.4432
CG42674	0.3984	0.3846	0.2266	0.1336	0.2932	0.4715	0.0158	0.0043	0.4012	0.022	0.1719	0.1052	0.4698	0.4606	0.461	0.1898	0.1676	0.1856	0.1573	0.3372	0.4079	0.1298	0.0727	0.0811	0.0543	0.3019	0.0635	0.2223	0.0026	0.3058	0.123	0.0159	0.0359	0.4647	0.1208	0.3157	0.2664	0.1986	0.3354	0.4289	0.2283	0.2593	0.0002	0.2069	0.3083	0.1652	0.0291	0.1578	0.2483
GstT3	0.0014	0.4277	0.3161	0.3768	0.4209	0.272	0.1547	0.1135	0.0912	0.4049	0.1861	0.1361	0.2763	0.3108	0.3147	0.2628	0.2436	0.2	0.1162	0.216	0.504	0.3037	0.4976	0.0662	0.0105	0.3083	0.3892	0.1207	0.2422	0.173	0.1521	0.3093	0.3538	0.3098	0.3164	0.0122	0.1924	0.4468	0.2091	0.106	0.2643	0.0766	0.3834	0.4282	0.0941	0.2051	0.4389	0.0449	0.3001
CG13004	0.1241	0.0282	0.4334	0.1578	0.3079	0.1297	0.451	0.4745	0.272	0.0847	0.184	0.1244	0.376	0.0007	0.0487	0.0088	0.1262	0.3259	0.0078	0.0067	0.2067	0.4175	0.1969	0.0721	0.2055	0.03	0.0475	0.0511	0.4737	0.1941	0.104	0.036	0.1846	0.0565	0.1349	0.0233	0.1581	0.1574	0.3869	0.3868	0.0356	0.076	0.1878	0.3135	0.0075	0.0007	0.0345	0.2355	0.4458
wit	0.1626	0.2616	0.0352	0.2663	0.0876	0.4267	0.2164	0.1279	0.0294	0.1335	0.1842	0.3083	0.1648	0.1707	0.2128	0.3033	0.2434	0.1655	0.368	0.171	0.235	0.0247	0.5223	0.3846	0.1115	0.0834	0.0593	0.2556	0.2656	0.3612	0.1991	0.3618	0.0402	0.2364	0.001	0.36	0.457	0.04	0.0572	0.3291	0.2454	0.2759	0.4537	0.0313	0.2629	0.4071	0.2569	0.0274	0.247
CG12592	0.4976	0.0387	0.4335	0.3439	0.1137	0.0206	0.4751	0.501	0.2275	0.4448	0.3109	0.4215	0.2586	0.052	0.0358	0.2772	0.2893	0.2265	0.1773	0.1916	0.0211	0.2745	0.0497	0.535	0.4193	0.0289	0.3553	0.0733	0.3621	0.1847	0.2274	0.366	0.3547	0.0049	0.3724	0.4728	0.2988	0.4415	0.1809	0.0578	0.0378	0.2634	0.3748	0.3165	0.0939	0.2001	0.3162	0.1417	0.1448
Bruce	0.3283	0.2922	0.2341	0.0501	0.4352	0.3235	0.0377	0.0591	0.469	0.0091	0.2249	0.0312	0.5911	0.0884	0.2272	0.0646	0.1434	0.2645	0.3226	0.089	0.4006	0.0761	0.3543	0.3276	0.3027	0.0899	0.0157	0.443	0.0167	0.1519	0.0085	0.0003	0.0269	0.215	0.0881	0.1377	0.1588	0.4111	0.2441	0.2834	0.1507	0.1628	0.0116	0.2226	0.3018	0.0251	0.0039	0.0918	0.3217
NitFhit	0.3514	0.1162	0.2488	0.1762	0.2601	0.2909	0.434	0.2257	0.2416	0.3105	0.0121	0.3996	0.0428	0.4077	0.1471	0.3796	0.1289	0.1904	0.1408	0.3402	0.2065	0.2494	0.4512	0.1395	0.0633	0.2565	0.37	0.1251	0.3462	0.0233	0.109	0.1012	0.4571	0.2392	0.3595	0.3311	0	0.3548	0.1708	0.1397	0.1441	0.2997	0.4897	0.1859	0.0999	0.2874	0.2979	0.189	0.0451
Gli	0.4366	0.1069	0.3967	0.3318	0.1049	0.1143	0.367	0.2808	0.1998	0.2881	0.364	0.4417	0.4398	0.1796	0.2278	0.4269	0.3757	0.2534	0.1958	0.4866	0.096	0.2346	0.0803	0.3682	0.4159	0.0654	0.4756	0.2164	0.2088	0.0563	0.1215	0.3458	0.2613	0.0924	0.5206	0.5096	0.1155	0.3726	0.1985	0.0343	0.2043	0.3413	0.2977	0.301	0.2356	0.4705	0.4997	0.1869	0.0895
Atf6	0.4498	0.1092	0.0427	0.4832	0.2576	0.3192	0.2911	0.0546	0.2399	0.4763	0.0847	0.4095	0.3374	0.4355	0.1911	0.3895	0.026	0.0507	0.0806	0.3059	0.2701	0.0685	0.3839	0.0238	0.1578	0.4934	0.3875	0.2644	0.2443	0.4188	0.4139	0.1994	0.3717	0.1433	0.1337	0.4376	0.1216	0.2742	0.0553	0.3691	0.098	0.2893	0.3095	0.515	0.1156	0.3142	0.2324	0.3236	0.2776
CG9839	0.1484	0.0267	0.387	0.3195	0.0459	0.2331	0.531	0.5124	0.1394	0.5072	0.2361	0.1966	0.4027	0.0537	0.3747	0.2369	0.2584	0.1738	0.1332	0.157	0.3641	0.3346	0.0038	0.219	0.34	0.0191	0.2994	0.3275	0.3068	0.3629	0.3913	0.4124	0.3415	0.3469	0.0695	0.42	0.416	0.0619	0.237	0.2582	0.5018	0.2761	0.3108	0.2692	0.3497	0.3101	0.3883	0.0727	0.4095
PI31	0.4523	0.0529	0.0554	0.2234	0.4381	0.1366	0.1675	0.2519	0.1751	0.1942	0.127	0.259	0.0484	0.1864	0.0006	0.2161	0.4042	0.4543	0.1293	0.2643	0.0656	0.0833	0.0019	0.1516	0.1313	0.412	0.1838	0.0152	0.0979	0.3863	0.2102	0.4737	0.1821	0.0155	0.2183	0.4249	0.2379	0.4561	0.1532	0.2301	0.0769	0.4282	0.5117	0.0268	0.0156	0.2332	0.4135	0.4334	0.0808
Nepl3	0.0857	0.1341	0.5126	0.3545	0.184	0.1857	0.4638	0.4251	0.1562	0.214	0.2593	0.2234	0.5108	0.1709	0.2616	0.4481	0.2705	0.2424	0.2671	0.4192	0.092	0.4799	0.0113	0.417	0.2122	0.0499	0.4	0.3454	0.3617	0.1586	0.082	0.2902	0.4055	0.2018	0.3059	0.2568	0.1741	0.3259	0.4074	0.0271	0.4213	0.1784	0.4408	0.3982	0.422	0.5068	0.4473	0.0812	0.2912
plum	0.3114	0.2372	0.1618	0.2364	0.3664	0.0686	0.1103	0.0885	0.3708	0.0393	0.4912	0.376	0.1593	0.246	0.0871	0.6076	0.3882	0.1905	0.1985	0.3426	0.0035	0.062	0.0339	0.3415	0.1649	0.3564	0.0653	0.0167	0.0625	0.1429	0.0271	0.1103	0.0104	0.1199	0.1404	0.5049	0.1805	0.4344	0.142	0.0833	0.224	0.1922	0.1956	0.1543	0.0846	0.5392	0.1189	0.2752	0.5083
AOX1	0.4408	0.1519	0.2228	0.0903	0.3283	0.4054	0.2958	0.341	0.1749	0.4087	0.4041	0.2468	0.3955	0.0125	0.0495	0.0098	0.3737	0.453	0.0891	0.0784	0.0174	0.479	0.0707	0.2284	0.4763	0.0093	0.3711	0.1657	0.4497	0.3371	0.3323	0.3098	0.3094	0.069	0.2549	0.3078	0.3259	0.2488	0.4561	0.1355	0.1042	0.3272	0.1726	0.144	0.0634	0.0236	0.1599	0.0988	0.4031
shrb	0.4381	0.4056	0.3752	0.2349	0.1807	0.2967	0.3841	0.1985	0.4097	0.3783	0.4191	0.1658	0.4642	0.3173	0.155	0.3128	0.4767	0.2389	0.3261	0.4085	0.0021	0.3942	0.2984	0.216	0.2226	0.1797	0.3234	0.3461	0.3546	0.0751	0.0867	0.4191	0.3791	0.1487	0.4952	0.298	0.0574	0.2357	0.415	0.0414	0.2595	0.12	0.1273	0.0853	0.3791	0.3215	0.4814	0.273	0.1454
PhKgamma	0.2055	0.1796	0.3989	0.416	0.3927	0.2102	0.1563	0.0574	0.3206	0.2271	0.1207	0.4761	0.1366	0.2148	0.0762	0.1372	0.3681	0.1696	0.4609	0.1975	0.1888	0.3755	0.3622	0.1531	0.178	0.172	0.3115	0.2917	0.1737	0.3247	0.4456	0.1081	0.2661	0.1268	0.2174	0.2039	0.2458	0.3352	0.4822	0.2875	0.1299	0.1495	0.0241	0.0363	0.3307	0.1796	0.1709	0.1162	0.4875
wnd	0.4314	0.231	0.0379	0.4209	0.4578	0.2361	0.1098	0.0435	0.2279	0.039	0.3882	0.3603	0.4436	0.2681	0.1096	0.5288	0.3845	0.3445	0.1136	0.4717	0.023	0.0334	0.0354	0.0924	0.1732	0.2853	0.0781	0.0778	0.0513	0.0486	0.0151	0.1282	0.0308	0.1145	0.0803	0.4463	0.1272	0.4619	0.1362	0.0244	0.206	0.3341	0.1472	0.3123	0.0825	0.4164	0.2317	0.3758	0.5032
RpS24	0.4673	0.3402	0.0642	0.0912	0.486	0.2852	0.4699	0.0461	0.406	0.086	0.3142	0.2402	0.2609	0.0485	0.4281	0.0551	0.2882	0.4262	0.3025	0.0359	0.3559	0.007	0.3413	0.3443	0.246	0.0443	0.0773	0.4642	0.1325	0.2249	0.0958	0.1703	0.0295	0.5229	0.0056	0.0965	0.4346	0.0028	0.0104	0.2618	0.3628	0.0934	0.1136	0.3813	0.4283	0.0977	0.1197	0.027	0.3276
shop	0.267	0.0088	0.2067	0.2009	0.2382	0.0231	0.4672	0.4695	0.2867	0.1966	0.0637	0.1964	0.2329	0.0156	0.0057	0.0819	0.0433	0.1389	0.0031	0.0926	0.1409	0.3014	0.1771	0.0642	0.2657	0.0401	0.1196	0.0296	0.4346	0.3543	0.2818	0.0359	0.346	0.0012	0.2962	0.2021	0.1757	0.427	0.1546	0.2996	0.0021	0.2939	0.1828	0.1461	0.0025	0.0102	0.0435	0.2313	0.4307
CG14985	0.4589	0.0138	0.0572	0.4498	0.3585	0.1862	0.2552	0.2505	0.1213	0.4562	0.1248	0.3929	0.1081	0.0416	0.0008	0.0652	0.2187	0.3223	0.012	0.1075	0.1034	0.1645	0.0106	0.0631	0.0915	0.1889	0.4556	0.0133	0.1421	0.272	0.4411	0.2432	0.3722	0.0089	0.422	0.3327	0.1404	0.3788	0.2024	0.2998	0.0208	0.2761	0.4293	0.043	0.0012	0.0467	0.2792	0.4277	0.1127
CG45089	0.1185	0.1343	0.4595	0.3334	0.1006	0.2118	0.2209	0.1007	0.4411	0.3755	0.3552	0.4894	0.3535	0.1662	0.4919	0.3998	0.4037	0.4666	0.0668	0.1431	0.2484	0.4606	0.3335	0.0985	0.0316	0.5041	0.2138	0.1542	0.1038	0.0914	0.1103	0.3573	0.4462	0.4772	0.4554	0.0197	0.1183	0.1009	0.3943	0.0721	0.4733	0.0983	0.1456	0.1187	0.1352	0.2718	0.4629	0.2351	0.2962
Mo25	0.4496	0.0901	0.2682	0.2612	0.0886	0.0379	0.0066	0.1952	0.1263	0.0605	0.048	0.2372	0.2325	0.1951	0.1663	0.3064	0.0436	0.0146	0.3838	0.2524	0.4583	0.4232	0.3564	0.2982	0.2011	0.107	0.03	0.3078	0.1354	0.399	0.1668	0.012	0.2154	0.0874	0.1841	0.4692	0.2079	0.32	0.2382	0.3659	0.0388	0.2878	0.0864	0.4226	0.305	0.1588	0.0393	0.1292	0.1301
robl	0.1822	0.0148	0.1317	0.1557	0.1354	0.0996	0.1294	0.0582	0.2111	0.3692	0.0638	0.3497	0.05	0.1117	0.023	0.2714	0.2446	0.4011	0.0053	0.1365	0.3285	0.1114	0.0275	0.0242	0.0027	0.484	0.4624	0.0021	0.0297	0.1211	0.3587	0.3085	0.2006	0.0381	0.3062	0.1285	0.0539	0.3059	0.092	0.347	0.0775	0.1904	0.2488	0.2238	0.0021	0.1736	0.4903	0.1989	0.08
l(2)k09848	0.4274	0.0283	0.0834	0.4222	0.2868	0.4335	0.0836	0.1019	0.166	0.2759	0.4923	0.1595	0.3702	0.073	0.0888	0.1912	0.4765	0.4093	0.0077	0.2024	0.2773	0.2295	0.002	0.0096	0.0635	0.2167	0.363	0.0653	0.0268	0.3505	0.3648	0.4363	0.3632	0.1524	0.4276	0.2615	0.2756	0.1132	0.4061	0.3739	0.2388	0.1135	0.2009	0.319	0.0204	0.1913	0.4931	0.4131	0.0875
mtgo	0.3275	0.2443	0.3033	0.0667	0.2108	0.1256	0.034	0.0134	0.5021	0.0164	0.4375	0.1553	0.1087	0.3194	0.2091	0.4265	0.1069	0.1496	0.153	0.3126	0.103	0.117	0.027	0.2127	0.0453	0.3609	0.0366	0.0188	0.0031	0.4656	0.0976	0.0491	0.0052	0.2184	0.1693	0.3846	0.3633	0.3349	0.2043	0.3745	0.5187	0.3296	0.0095	0.4523	0.1573	0.2911	0.0126	0.155	0.2589
28SrRNA-Psi:CR41609	0.4133	0.0177	0.4822	0.252	0.1341	0.0051	0.3908	0.3095	0.3155	0.2162	0.1294	0.2598	0.2055	0.0121	0.0174	0.093	0.1673	0.1476	0.0681	0.0569	0.0649	0.4579	0.1435	0.4934	0.4433	0.0114	0.1208	0.0582	0.4425	0.4817	0.3946	0.0794	0.342	0.0102	0.1795	0.3276	0.3354	0.3791	0.2608	0.2045	0.0234	0.3731	0.1398	0.196	0.0511	0.0402	0.0857	0.084	0.2134
Den1	0.0937	0.2585	0.0587	0.34	0.0171	0.2929	0.1288	0.2337	0.0005	0.2949	0.401	0.1632	0.3822	0.4636	0.3058	0.2932	0.3925	0.0488	0.3298	0.4905	0.1621	0.219	0.3863	0.1163	0.1068	0.3986	0.2055	0.3441	0.2848	0.3484	0.2987	0.3634	0.2921	0.3548	0.1511	0.2561	0.2961	0.3809	0.3475	0.4173	0.3787	0.1691	0.4904	0.1872	0.1965	0.2802	0.4379	0.1362	0.3112
crp	0.4021	0.178	0.3777	0.363	0.4126	0.2303	0.1479	0.1288	0.3216	0.118	0.0309	0.3139	0.1166	0.19	0.0322	0.0585	0.1382	0.1824	0.3691	0.1569	0.2812	0.4615	0.488	0.4077	0.412	0.2681	0.266	0.2453	0.1702	0.1584	0.2636	0.0242	0.2312	0.0821	0.3285	0.3637	0.0863	0.2534	0.4052	0.4433	0.0367	0.3713	0.0125	0.0159	0.1778	0.0547	0.0713	0.2693	0.293
CG40006	0.4389	0.4451	0.0505	0.0993	0.4143	0.2593	0.438	0.0896	0.2286	0.1015	0.0702	0.3753	0.0624	0.0711	0.2188	0.0786	0.1841	0.4537	0.3658	0.0574	0.4378	0.005	0.4791	0.4986	0.1757	0.0416	0.0611	0.2543	0.2271	0.3622	0.1616	0.3629	0.0223	0.2199	0.0012	0.1407	0.3831	0.0112	0.0055	0.2468	0.2746	0.1419	0.2836	0.1144	0.3461	0.1705	0.2048	0.0276	0.2148
Treh	0.447	0.0915	0.2516	0.2968	0.4246	0.0133	0.4876	0.309	0.4217	0.3991	0.1045	0.2264	0.1367	0.0845	0.003	0.1282	0.1612	0.283	0.2656	0.1819	0.012	0.2579	0.1591	0.4495	0.4427	0.0738	0.3793	0.0656	0.4373	0.355	0.3087	0.1598	0.4491	0.0017	0.4251	0.4202	0.4838	0.2698	0.1629	0.0764	0.0063	0.2591	0.0908	0.0101	0.0571	0.0775	0.1757	0.2147	0.318
out	0.2005	0.3115	0.3393	0.2401	0.4138	0.2759	0.0647	0.1931	0.099	0.3366	0.2712	0.3885	0.1631	0.069	0.4964	0.088	0.4781	0.3017	0.0831	0.113	0.4344	0.4034	0.2526	0.0275	0.0885	0.2377	0.2991	0.3171	0.1783	0.3276	0.2453	0.4467	0.3173	0.5456	0.3684	0.0328	0.3765	0.0462	0.2924	0.259	0.5299	0.0077	0.2215	0.264	0.1323	0.0846	0.3122	0.5145	0.2999
Myc	0.3172	0.2183	0.2871	0.0146	0.0268	0.0346	0.2548	0.2589	0.0746	0.1991	0.138	0.2607	0.0096	0.4549	0.2543	0.2232	0.2858	0.4749	0.4176	0.3939	0.2982	0.2316	0.1779	0.2522	0.2709	0.2874	0.322	0.0602	0.1492	0.3767	0.3909	0.339	0.0862	0.2537	0.3293	0.4289	0.3686	0.4695	0.159	0.4438	0.4824	0.1157	0.226	0.3418	0.3414	0.2326	0.1278	0.2064	0.4428
Snx3	0.1872	0.0961	0.1118	0.3748	0.4968	0.3588	0.058	0.1125	0.0571	0.3796	0.4605	0.4509	0.497	0.0301	0.1107	0.0789	0.3725	0.3518	0.0104	0.0923	0.228	0.2961	0.0332	0.0017	0.0287	0.1855	0.4956	0.0634	0.0501	0.3988	0.4629	0.4712	0.4051	0.1337	0.4463	0.0559	0.3749	0.1303	0.3855	0.4925	0.1682	0.0727	0.2467	0.369	0.0045	0.0605	0.3877	0.459	0.2362
Nmnat	0.2934	0.0628	0.3568	0.1693	0.3004	0.3004	0.1793	0.3871	0.2491	0.0453	0.1429	0.2336	0.4962	0.0512	0.224	0.062	0.0099	0.0817	0.0509	0.1068	0.2705	0.4294	0.4095	0.0838	0.244	0.1425	0.0201	0.2752	0.3833	0.1355	0.033	0.0126	0.1119	0.1731	0.2435	0.1126	0.0421	0.2721	0.351	0.2668	0.0243	0.0841	0.3074	0.4796	0.0794	0.0114	0.008	0.3086	0.4122
lt	0.3163	0.368	0.2636	0.0682	0.0931	0.4542	0.2966	0.222	0.0648	0.2877	0.434	0.1145	0.3608	0.0393	0.093	0.0097	0.3824	0.2733	0.2171	0.0754	0.0358	0.369	0.2191	0.2589	0.4745	0.051	0.3712	0.2845	0.3627	0.4694	0.476	0.2493	0.2308	0.1545	0.238	0.2628	0.3978	0.3547	0.3466	0.2883	0.1526	0.2354	0.0637	0.084	0.1223	0.0187	0.1345	0.1899	0.4748
Pmm2	0.2231	0.008	0.1021	0.4605	0.272	0.1356	0.1799	0.1634	0.1355	0.5059	0.1932	0.4591	0.2031	0.0075	0.0079	0.0478	0.2	0.399	0.0007	0.0481	0.1207	0.2015	0.0108	0.0126	0.037	0.122	0.3934	0.0049	0.0953	0.2966	0.4344	0.2402	0.3927	0.0115	0.5018	0.1018	0.1862	0.201	0.1965	0.4119	0.0284	0.1161	0.4458	0.1912	0.0001	0.0225	0.2508	0.4587	0.2224
MSBP	0.1444	0.3871	0.3139	0.3873	0.3887	0.1953	0.1137	0.225	0.4865	0.087	0.0256	0.042	0.19	0.435	0.3306	0.4344	0.0628	0.3864	0.3155	0.4418	0.4583	0.476	0.0718	0.2213	0.4206	0.3774	0.1472	0.4519	0.0845	0.2789	0.1103	0.0358	0.3533	0.2944	0.5056	0.4137	0.1943	0.0833	0.2174	0.2923	0.1425	0.3444	0.0432	0.2291	0.4579	0.2722	0.1446	0.3328	0.2768
Indy	0.231	0.3566	0.3633	0.3143	0.4807	0.2153	0.2335	0.0513	0.2527	0.347	0.2973	0.348	0.2773	0.2901	0.1411	0.2572	0.4294	0.3261	0.2615	0.3026	0.0738	0.3902	0.3702	0.0734	0.0822	0.1481	0.4044	0.4036	0.1367	0.3223	0.3003	0.2692	0.3509	0.163	0.2524	0.1465	0.352	0.2453	0.508	0.1127	0.2194	0.0676	0.0428	0.052	0.4778	0.2766	0.2685	0.0846	0.2128
Dg	0.2154	0.0873	0.2574	0.3349	0.4429	0.2258	0.1332	0.4037	0.2008	0.4884	0.4842	0.3685	0.4053	0.0076	0.0469	0.0389	0.5341	0.3121	0.0051	0.0367	0.0297	0.4416	0.0214	0.0375	0.1561	0.0618	0.4159	0.0266	0.184	0.4318	0.4214	0.4115	0.4762	0.0963	0.2642	0.0854	0.501	0.1134	0.4612	0.3525	0.1793	0.1097	0.3784	0.2023	0.0136	0.0591	0.3323	0.3021	0.4019
Iml1	0.3196	0.0478	0.3214	0.1692	0.2882	0.2882	0.3711	0.2355	0.419	0.033	0.301	0.2569	0.475	0.0025	0.1486	0.0077	0.2563	0.2696	0.0316	0.004	0.3962	0.124	0.2304	0.1257	0.3944	0.032	0.0316	0.1727	0.362	0.065	0.0266	0.0285	0.0598	0.1899	0.0522	0.0313	0.0669	0.0284	0.2783	0.2116	0.1456	0.0504	0.1275	0.3943	0.0709	0.0067	0.0327	0.0882	0.4749
Ltn1	0.4554	0.0033	0.2133	0.324	0.269	0.2488	0.3811	0.4945	0.2331	0.1765	0.1038	0.4938	0.2067	0.0143	0.0156	0.0103	0.1269	0.1106	0.0083	0.0407	0.3195	0.4556	0.0972	0.0879	0.2291	0.0716	0.1781	0.0717	0.4213	0.1125	0.1986	0.0389	0.2353	0.0431	0.2563	0.2662	0.0411	0.2602	0.3889	0.4995	0.0212	0.1784	0.2176	0.1257	0.0121	0.0048	0.0541	0.2003	0.1731
GXIVsPLA2	0.1059	0.3278	0.1579	0.2592	0.4541	0.1937	0.0594	0.4702	0.2571	0.2359	0.3002	0.3289	0.3115	0.3929	0.4891	0.484	0.0784	0.0281	0.4075	0.2396	0.0638	0.4473	0.2518	0.2137	0.4097	0.4882	0.3122	0.2142	0.3184	0.3532	0.2746	0.1462	0.2054	0.5043	0.4209	0.2045	0.1284	0.3228	0.4118	0.4595	0.2687	0.287	0.4069	0.4497	0.4848	0.3921	0.1143	0.3373	0.2433
NUCB1	0.2344	0.3972	0.3039	0.0936	0.2787	0.3392	0.3516	0.0834	0.4019	0.1282	0.4995	0.0401	0.3851	0.0651	0.1868	0.0571	0.5286	0.2586	0.3702	0.067	0.0537	0.1232	0.3017	0.2578	0.3209	0.0615	0.1558	0.3272	0.1514	0.383	0.3187	0.1714	0.1507	0.201	0.1143	0.1489	0.4273	0.3037	0.2037	0.4974	0.1864	0.4289	0.0605	0.1181	0.2728	0.078	0.1427	0.1172	0.249
SmydA-1	0.0419	0.3655	0.1789	0.1619	0.3438	0.1519	0.0326	0.3422	0.2658	0.2261	0.4112	0.3288	0.2444	0.4398	0.4826	0.3811	0.1382	0.0446	0.5303	0.2614	0.1485	0.4667	0.3127	0.3569	0.2491	0.3627	0.3387	0.1576	0.2173	0.4657	0.3934	0.1675	0.1544	0.5231	0.5223	0.1198	0.2348	0.3165	0.486	0.3202	0.2717	0.4446	0.2592	0.4619	0.4305	0.3255	0.1014	0.164	0.2962
Rab11	0.4199	0.0213	0.0943	0.4483	0.1603	0.0206	0.2443	0.1609	0.4303	0.1973	0.2349	0.3334	0.1799	0.1487	0.0156	0.2885	0.1998	0.2041	0.0307	0.3184	0.0482	0.0525	0.0186	0.16	0.2625	0.1389	0.3652	0.0187	0.1188	0.2232	0.1072	0.503	0.1359	0.0062	0.283	0.4188	0.4284	0.476	0.0798	0.0282	0.0529	0.2714	0.4035	0.1848	0.022	0.252	0.4408	0.3657	0.4843
CG4752	0.4748	0.0169	0.1149	0.3532	0.2267	0.005	0.4012	0.3978	0.3871	0.4829	0.1156	0.4253	0.1465	0.0867	0.0036	0.1924	0.1108	0.1501	0.0381	0.2253	0.0287	0.1121	0.0877	0.2699	0.3822	0.0677	0.4013	0.0302	0.2837	0.3179	0.2586	0.2061	0.3439	0.0017	0.4732	0.4138	0.4396	0.3418	0.0742	0.044	0.0117	0.2889	0.2635	0.0515	0.0139	0.1336	0.1986	0.2221	0.3883
Reph	0.2347	0.2746	0.0349	0.0382	0.3305	0.2041	0.0529	0.0004	0.189	0.035	0.1535	0.2234	0.0803	0.2838	0.1728	0.1576	0.3417	0.396	0.209	0.234	0.399	0.0024	0.155	0.1154	0.0091	0.0879	0.0647	0.0613	0.0027	0.4825	0.1904	0.2132	0.0037	0.1907	0.006	0.4618	0.3369	0.2245	0.0096	0.4037	0.333	0.4935	0.0346	0.2846	0.1078	0.2535	0.1068	0.0053	0.1074
CG11123	0.4546	0.0237	0.1062	0.4968	0.2436	0.44	0.4236	0.1461	0.1722	0.3558	0.1982	0.2749	0.3364	0.1752	0.171	0.2516	0.0957	0.093	0.0364	0.303	0.2537	0.2847	0.1938	0.0292	0.0762	0.372	0.338	0.1966	0.1723	0.1131	0.2238	0.1671	0.4293	0.2092	0.3853	0.2736	0.0198	0.2805	0.2904	0.3671	0.1123	0.1165	0.2763	0.3847	0.0477	0.1389	0.1908	0.5107	0.0833
sosie	0.0639	0.0513	0.1499	0.4213	0.3637	0.032	0.4595	0.2332	0.1413	0.2965	0.0202	0.1309	0.1039	0.0627	0.0099	0.1153	0.0215	0.3337	0.0209	0.1096	0.1844	0.1695	0.2608	0.0681	0.0625	0.2548	0.2273	0.0138	0.3345	0.2465	0.2189	0.062	0.4181	0.0036	0.4274	0.103	0.1089	0.4109	0.0478	0.4877	0.0008	0.2473	0.3085	0.1253	0.0024	0.0249	0.1258	0.3456	0.4065
snoRNA:Or-aca4	0.0011	0.3369	0.473	0.2209	0.2507	0.3468	0.438	0.4155	0.1885	0.2048	0.306	0.0064	0.3976	0.3224	0.4791	0.3166	0.1883	0.2262	0.3833	0.2915	0.4182	0.4824	0.1694	0.2973	0.2267	0.4706	0.1788	0.3753	0.3663	0.4377	0.1402	0.2005	0.4099	0.3603	0.4622	0.0314	0.5033	0.4117	0.3013	0.2161	0.28	0.1649	0.3208	0.3929	0.2741	0.1953	0.2291	0.2194	0.196
CG11601	0.3291	0.0055	0.2777	0.3248	0.3219	0.306	0.3729	0.2492	0.1526	0.1785	0.331	0.5026	0.3634	0.0041	0.1071	0.0005	0.2105	0.2727	0.005	0.0106	0.4951	0.5225	0.0728	0.0378	0.0789	0.1452	0.1685	0.1167	0.2138	0.0678	0.1619	0.1209	0.2431	0.1356	0.2808	0.0843	0.0477	0.095	0.5019	0.2996	0.0503	0.0816	0.4317	0.3223	0.0048	0.0021	0.1088	0.2939	0.1798
LpR2	0.2445	0.3744	0.2516	0.1912	0.2975	0.3368	0.5927	0.1189	0.2664	0.0832	0.4549	0.1443	0.4066	0.0643	0.2781	0.0081	0.4568	0.2863	0.2272	0.0216	0.3509	0.045	0.3824	0.4378	0.4691	0.1361	0.1235	0.3902	0.1877	0.0668	0.0396	0.1111	0.0662	0.3786	0.0767	0.0401	0.1979	0.0668	0.0809	0.1273	0.2689	0.0171	0.0971	0.226	0.272	0.0497	0.1238	0.2055	0.4508
Piezo	0.2211	0.3763	0.1695	0.1923	0.3168	0.3427	0.4052	0.507	0.4502	0.0711	0.2893	0.2826	0.1103	0.1302	0.2093	0.1952	0.4799	0.4574	0.1421	0.1167	0.1404	0.0935	0.3169	0.1364	0.3828	0.2187	0.0268	0.4026	0.41	0.1848	0.0257	0.2296	0.0683	0.2568	0.0671	0.0168	0.2873	0.0232	0.172	0.0652	0.3861	0.013	0.424	0.0228	0.4504	0.158	0.1607	0.3136	0.353
Ugt302C1	0.1176	0.3739	0.2495	0.482	0.1187	0.232	0.4303	0.3801	0.1487	0.4026	0.1507	0.1014	0.1187	0.4419	0.0788	0.3203	0.3928	0.1567	0.4215	0.4041	0.0341	0.2379	0.4584	0.4052	0.3429	0.4364	0.2857	0.1686	0.4117	0.4112	0.3063	0.3734	0.2517	0.1114	0.2837	0.4873	0.4131	0.1154	0.204	0.2992	0.1927	0.2496	0.1272	0.0095	0.1982	0.2878	0.4884	0.2463	0.4962
RpS27A	0.2708	0.0842	0.1825	0.1956	0.0974	0.0083	0.4047	0.2155	0.2847	0.2252	0.0385	0.2385	0.0143	0.453	0.0734	0.1885	0.1375	0.065	0.3842	0.2676	0.3002	0.0271	0.2087	0.3496	0.4312	0.4899	0.3363	0.1131	0.241	0.3394	0.1896	0.385	0.0753	0.0632	0.1132	0.1405	0.3546	0.1041	0.0236	0.0823	0.122	0.1237	0.4206	0.1836	0.2039	0.3979	0.4837	0.3986	0.4921
Imp	0.0147	0.4469	0.271	0.0617	0.4717	0.1982	0.018	0.0367	0.1985	0.102	0.2627	0.4407	0.0798	0.4392	0.2932	0.4201	0.3872	0.0394	0.3103	0.4054	0.2475	0.1155	0.2429	0.2053	0.0053	0.0886	0.1254	0.0604	0.0549	0.3249	0.3911	0.2223	0.0263	0.3467	0.077	0.1291	0.4115	0.4503	0.1587	0.2434	0.506	0.416	0.1218	0.3045	0.1642	0.4148	0.0698	0.0018	0.1884
CG15098	0.2219	0.4318	0.2778	0.1494	0.2685	0.3894	0.471	0.0439	0.3691	0.4208	0.1295	0.4085	0.233	0.2035	0.4174	0.1481	0.1912	0.338	0.3479	0.2514	0.0739	0.1528	0.2936	0.1889	0.0674	0.0664	0.4624	0.3639	0.2261	0.2271	0.2369	0.4292	0.215	0.4752	0.109	0.3233	0.1096	0.314	0.1008	0.1609	0.4429	0.3433	0.1146	0.3257	0.3766	0.2964	0.3789	0.0318	0.2123
Marf	0.1538	0.4122	0.4757	0.4342	0.4613	0.3772	0.0457	0.2995	0.3058	0.3156	0.0749	0.4585	0.2456	0.1148	0.476	0.1503	0.1017	0.0498	0.0963	0.1374	0.1785	0.3664	0.1031	0.0913	0.1746	0.2296	0.4517	0.241	0.124	0.4949	0.4034	0.1806	0.4835	0.4904	0.2683	0.0238	0.2314	0.0128	0.2121	0.3879	0.3169	0.037	0.2294	0.2672	0.2316	0.2425	0.3205	0.5056	0.5011
Gk2	0.2815	0.1814	0.0114	0.1198	0.2553	0.4312	0.4013	0.1896	0.015	0.4452	0.413	0.2336	0.3539	0.1097	0.0946	0.1286	0.0339	0.4159	0.0632	0.3914	0.2127	0.1868	0.2304	0.005	0.1641	0.1425	0.4384	0.2061	0.3051	0.3454	0.4472	0.2718	0.4939	0.0557	0.3172	0.2351	0.4767	0.5081	0.1937	0.2119	0.0229	0.1432	0.4855	0.2849	0.0338	0.0389	0.1396	0.4196	0.4106
tweek	0.2892	0.3536	0.0828	0.066	0.4977	0.2724	0.3901	0.1098	0.501	0.0335	0.3245	0.1475	0.1869	0.0415	0.442	0.0439	0.4526	0.4616	0.1817	0.0273	0.4538	0.0087	0.4612	0.3496	0.3863	0.0581	0.0193	0.4282	0.1445	0.1417	0.0146	0.1052	0.012	0.4103	0.0072	0.0144	0.2974	0.0043	0.0314	0.1002	0.4024	0.0015	0.1292	0.2452	0.4076	0.0567	0.0666	0.0724	0.3198
snoRNA:U3:54Aa	0.466	0.382	0.2299	0.1701	0.2738	0.0349	0.2845	0.1742	0.291	0.0244	0.324	0.3584	0.1277	0.3247	0.173	0.1153	0.4562	0.454	0.416	0.2213	0.0568	0.0251	0.1651	0.3226	0.4251	0.3957	0.0836	0.1416	0.1456	0.0517	0.0181	0.1448	0.0064	0.1117	0.062	0.1975	0.1118	0.1153	0.0312	0.0386	0.3124	0.0053	0.2464	0.2986	0.3315	0.1769	0.1096	0.2722	0.284
Alg12	0.3699	0.1011	0.2071	0.265	0.0768	0.4261	0.1947	0.3409	0.3462	0.362	0.4579	0.2227	0.3623	0.0812	0.4958	0.1629	0.2107	0.4969	0.0546	0.0424	0.2855	0.2078	0.1479	0.1353	0.1438	0.3593	0.2333	0.1892	0.1808	0.0259	0.1045	0.4327	0.3083	0.3849	0.1143	0.0402	0.0931	0.0003	0.1976	0.0415	0.3397	0.0647	0.2325	0.2169	0.229	0.2529	0.5038	0.4405	0.1753
Irk1	0.4721	0.0173	0.1192	0.3224	0.3178	0.0398	0.4018	0.4884	0.291	0.4258	0.1099	0.4041	0.152	0.0486	0.0009	0.1191	0.1363	0.1863	0.0392	0.1686	0.0326	0.1895	0.0664	0.2501	0.3653	0.0567	0.3841	0.0334	0.352	0.4642	0.3463	0.1473	0.4609	0.0027	0.4299	0.4754	0.3299	0.4068	0.1538	0.0879	0.0075	0.3859	0.2004	0.0153	0.0124	0.0599	0.1478	0.1984	0.4722
Khc-73	0.3883	0.2691	0.2632	0.0265	0.4287	0.3581	0.0917	0.0761	0.3816	0.0061	0.3748	0.0806	0.2908	0.0555	0.3079	0.0288	0.1852	0.2598	0.1843	0.0657	0.4961	0.0368	0.371	0.4099	0.3371	0.0589	0.0084	0.4725	0.0446	0.1168	0.0052	0.0059	0.0035	0.3058	0.0372	0.0816	0.1441	0.1241	0.127	0.2135	0.1922	0.0182	0.0524	0.4727	0.3111	0.0142	0.0033	0.0573	0.3677
Rs1	0.4661	0.2256	0.0137	0.3454	0.2588	0.3693	0.1565	0.1387	0.009	0.2729	0.3083	0.2552	0.2545	0.3664	0.0945	0.3192	0.3877	0.4238	0.1253	0.4867	0.3794	0.1462	0.0875	0.0286	0.0462	0.3873	0.1711	0.1572	0.1005	0.2464	0.3655	0.4974	0.2925	0.2348	0.1826	0.4608	0.1673	0.486	0.3325	0.4583	0.2751	0.2055	0.3418	0.0939	0.0653	0.2865	0.4782	0.2615	0.0132
CG3008	0.4174	0.0668	0.4901	0.1872	0.3861	0.2068	0.0866	0.1153	0.4112	0.0517	0.0695	0.2441	0.236	0.0516	0.0464	0.0359	0.1475	0.1134	0.1771	0.074	0.2647	0.3159	0.3441	0.529	0.3726	0.0624	0.083	0.213	0.1481	0.1509	0.1515	0.0067	0.0971	0.0931	0.1403	0.4388	0.0817	0.4792	0.4594	0.472	0.05	0.4903	0.024	0.0445	0.1117	0.0164	0.0182	0.0829	0.4697
CG10365	0.1054	0.3759	0.0696	0.2378	0.2961	0.126	0.0547	0.1339	0.1001	0.083	0.2331	0.3681	0.0819	0.3703	0.0406	0.4106	0.4274	0.1149	0.2941	0.4004	0.013	0.0367	0.0937	0.3065	0.0656	0.3962	0.0784	0.024	0.0966	0.3382	0.1098	0.2879	0.0265	0.0687	0.0679	0.4019	0.3517	0.2293	0.0811	0.2073	0.2048	0.3494	0.427	0.0153	0.0542	0.3747	0.2117	0.112	0.306
CR40959	0.4865	0.2187	0.252	0.1989	0.3974	0.0285	0.1567	0.366	0.4285	0.3944	0.1192	0.1614	0.3129	0.3105	0.0653	0.4087	0.0415	0.1369	0.5081	0.4913	0.0846	0.1661	0.4378	0.2866	0.2498	0.1352	0.3297	0.2603	0.2809	0.0962	0.2622	0.1708	0.4094	0.0198	0.4152	0.2323	0.3233	0.0735	0.0549	0.0191	0.0242	0.132	0.146	0.1692	0.226	0.2495	0.1608	0.2414	0.091
AGO2	0.4062	0.4107	0.0827	0.0362	0.0251	0.1209	0.4615	0.4405	0.0039	0.3578	0.2837	0.1579	0.0998	0.2033	0.2976	0.0587	0.2645	0.3017	0.2521	0.4037	0.2133	0.4811	0.4685	0.146	0.4479	0.1657	0.5066	0.4303	0.3526	0.308	0.4457	0.3638	0.2614	0.3491	0.5444	0.3555	0.3226	0.4549	0.3596	0.2717	0.2629	0.1543	0.1844	0.212	0.2467	0.0536	0.1529	0.2864	0.4445
Fnta	0.4441	0.085	0.0245	0.4106	0.4319	0.2141	0.1388	0.2227	0.0777	0.2083	0.2374	0.3979	0.1333	0.1288	0.0032	0.1871	0.3209	0.4535	0.0703	0.2528	0.0252	0.0765	0.0095	0.1137	0.1092	0.2812	0.2004	0.0192	0.1027	0.4629	0.1662	0.5046	0.194	0.0207	0.2363	0.4748	0.3961	0.4634	0.1644	0.1498	0.0755	0.4682	0.4856	0.0166	0.0085	0.1601	0.4976	0.4551	0.1511
CG42565	0.1475	0.3889	0.4499	0.0017	0.2503	0.2259	0.1756	0.0668	0.3853	0.109	0.2187	0.2626	0.0507	0.137	0.4092	0.1163	0.2916	0.2159	0.4502	0.3133	0.3295	0.1684	0.4841	0.5116	0.0638	0.0097	0.1496	0.1979	0.0909	0.2505	0.4672	0.1854	0.0295	0.389	0.098	0.3597	0.2956	0.3303	0.1847	0.1508	0.2683	0.38	0.0626	0.4973	0.4893	0.0966	0.0327	0.0018	0.1843
Lk6	0.2587	0.2675	0.3803	0.1946	0.3085	0.213	0.0011	0.1053	0.2849	0.0295	0.064	0.3085	0.3821	0.4435	0.3746	0.3748	0.0147	0.0034	0.4749	0.5018	0.2257	0.3286	0.129	0.2643	0.1344	0.2497	0.0299	0.3592	0.0609	0.3451	0.1149	0.0063	0.0764	0.2727	0.2114	0.2951	0.1344	0.2275	0.3758	0.4755	0.0667	0.3349	0.0376	0.3402	0.4644	0.2053	0.0092	0.1495	0.3025
Galk	0.4854	0.1408	0.0637	0.4322	0.4842	0.0345	0.4643	0.4134	0.3011	0.3278	0.1089	0.3633	0.1083	0.2721	0.0048	0.3579	0.1134	0.2836	0.3153	0.4539	0.015	0.0514	0.1571	0.5004	0.4475	0.2169	0.3286	0.073	0.3684	0.1642	0.1103	0.3356	0.1787	0.0045	0.2023	0.2323	0.3926	0.0964	0.0349	0.0148	0.0193	0.1475	0.2537	0.0055	0.0661	0.2519	0.3369	0.4343	0.3928
TBC1D16	0.1971	0.0362	0.3725	0.2679	0.0004	0.1499	0.4522	0.2358	0.0336	0.3828	0.4208	0.08	0.3266	0.3534	0.4248	0.2686	0.4683	0.0471	0.1887	0.5089	0.3546	0.3573	0.1627	0.3872	0.5052	0.2849	0.3639	0.2687	0.1784	0.4528	0.4409	0.4439	0.3544	0.321	0.4229	0.4531	0.375	0.2307	0.3112	0.3539	0.3979	0.4115	0.1403	0.1435	0.3794	0.3342	0.4329	0.2637	0.4316
anne	0.1174	0.432	0.0911	0.0492	0.3692	0.184	0.1175	0.0047	0.2362	0.0761	0.1398	0.3908	0.0835	0.2184	0.2837	0.1449	0.3061	0.3314	0.2892	0.2132	0.4522	0.0068	0.3458	0.1972	0.0151	0.0579	0.1116	0.1014	0.023	0.4718	0.2746	0.2448	0.007	0.2597	0.0078	0.3786	0.3755	0.1696	0.0071	0.4949	0.3902	0.5037	0.064	0.36	0.1781	0.2268	0.1123	0.001	0.2107
Gk1	0.3377	0.3645	0.3229	0.1292	0.3385	0.3026	0.5182	0.2346	0.4917	0.3988	0.3261	0.2889	0.3794	0.1776	0.1348	0.2731	0.4745	0.5085	0.466	0.4201	0.0068	0.4081	0.1825	0.3709	0.1582	0.033	0.4412	0.3625	0.374	0.0504	0.0807	0.4743	0.4976	0.0925	0.4351	0.2697	0.0636	0.3911	0.4554	0.0109	0.1924	0.1842	0.1594	0.2008	0.315	0.2616	0.3362	0.0915	0.1169
Vps13D	0.4832	0.1058	0.3081	0.0267	0.3629	0.2428	0.2772	0.1077	0.4131	0.0835	0.4714	0.1608	0.3275	0.0068	0.1618	0.046	0.2512	0.2372	0.1096	0.0531	0.1478	0.127	0.2283	0.5189	0.2535	0	0.0498	0.3278	0.1686	0.3901	0.2392	0.0776	0.0735	0.1505	0.0476	0.2042	0.4642	0.1257	0.26	0.4042	0.1451	0.2509	0.0851	0.4289	0.1986	0.0294	0.0335	0.009	0.1981
CG32473	0.2482	0.331	0.4874	0.0387	0.4726	0.2869	0.0187	0.0877	0.3227	0.1852	0.341	0.1404	0.3511	0.2729	0.2142	0.3516	0.0862	0.0955	0.3913	0.4665	0.1647	0.456	0.3781	0.2217	0.0394	0.0363	0.1604	0.3984	0.0588	0.1122	0.3992	0.1202	0.2191	0.1051	0.2929	0.1879	0.2616	0.1798	0.349	0.0455	0.0683	0.1605	0.0278	0.3342	0.4777	0.1989	0.0495	0.0307	0.0404
bsf	0.4978	0.0787	0.0852	0.3047	0.4251	0.2413	0.26	0.3421	0.0905	0.3757	0.1143	0.343	0.0778	0.1396	0.0019	0.0396	0.397	0.4828	0.1364	0.1265	0.1943	0.2327	0.0165	0.1504	0.1176	0.4217	0.2859	0.0532	0.2169	0.1233	0.5014	0.2756	0.3459	0.0425	0.2969	0.4317	0.0902	0.4472	0.3139	0.4722	0.0577	0.2514	0.3584	0.0309	0.0169	0.0882	0.4281	0.4333	0.031
Itpr	0.4054	0.4206	0.1282	0.0874	0.3906	0.3494	0.0372	0.0611	0.2882	0.0008	0.2179	0.0863	0.3601	0.268	0.3864	0.1806	0.0743	0.0786	0.5251	0.1995	0.1759	0.0887	0.0775	0.3501	0.1696	0.1836	0.0001	0.2745	0.0274	0.2238	0.0045	0.0057	0.012	0.5274	0.0417	0.2879	0.1712	0.4578	0.3462	0.231	0.2056	0.236	0.0325	0.2907	0.408	0.0854	0.0055	0.1529	0.1389
CG8839	0.2476	0.1151	0.0558	0.2255	0.1935	0.0986	0.3583	0.0046	0.2561	0.2935	0.0585	0.4128	0.1133	0.4843	0.1299	0.3017	0.0587	0.2229	0.0699	0.3598	0.4773	0.0121	0.2768	0.0294	0.0257	0.319	0.3945	0.0706	0.0785	0.4538	0.4681	0.3933	0.0807	0.0877	0.0479	0.372	0.1775	0.2499	0.0092	0.4045	0.0984	0.3801	0.1297	0.4208	0.0538	0.4549	0.4959	0.103	0.2587
Letm1	0.2893	0.0104	0.1382	0.4128	0.2133	0.0602	0.1529	0.1975	0.2361	0.3971	0.1884	0.4378	0.1182	0.0159	0.0037	0.0872	0.3184	0.4155	0.0004	0.0624	0.0579	0.1804	0.0027	0.0295	0.0666	0.1311	0.4842	0.0006	0.0894	0.3278	0.415	0.3216	0.3165	0.0118	0.4694	0.1687	0.2356	0.2231	0.2074	0.3153	0.0607	0.2791	0.4831	0.1077	0.0004	0.0691	0.3584	0.4437	0.2285
Six4	0.2734	0.341	0.3855	0.3849	0.3554	0.1639	0.1634	0.3593	0.3709	0.3143	0.448	0.2564	0.3316	0.1168	0.0772	0.1721	0.375	0.1542	0.3925	0.1701	0	0.3911	0.0889	0.3935	0.479	0.1395	0.3477	0.1061	0.3577	0.2246	0.1392	0.3953	0.3361	0.1075	0.3947	0.3962	0.1439	0.4544	0.419	0.1258	0.2554	0.3142	0.2521	0.0702	0.1384	0.215	0.4553	0.342	0.2966
Sod2	0.449	0.2667	0.2103	0.0734	0.4484	0.3092	0.1068	0.0598	0.4184	0.0088	0.3817	0.1664	0.3273	0.067	0.3177	0.0258	0.2911	0.293	0.2302	0.055	0.4703	0.0236	0.4407	0.4966	0.3366	0.0798	0.0262	0.482	0.0593	0.0645	0.0064	0.0167	0.0042	0.3591	0.0312	0.119	0.1005	0.0912	0.0892	0.1684	0.2058	0.021	0.0577	0.393	0.339	0.0311	0.017	0.0625	0.4506
Upf2	0.2873	0.4677	0.2903	0.0016	0.1706	0.205	0.2336	0.2212	0.2624	0.2352	0.1573	0.1878	0.0072	0.2178	0.4918	0.2097	0.2143	0.3318	0.3819	0.5392	0.2854	0.3327	0.3937	0.3146	0.1274	0.0264	0.2562	0.2045	0.1872	0.0946	0.3835	0.33	0.1207	0.3901	0.2729	0.4254	0.1332	0.443	0.3144	0.0848	0.2657	0.2925	0.1472	0.4493	0.5023	0.1374	0.0677	0.0463	0.1077
Tsf1	0.2327	0.1705	0.485	0.0563	0.4238	0.0938	0.4047	0.1587	0.3376	0.107	0.238	0.031	0.4535	0.0212	0.0446	0.0396	0.1641	0.389	0.1563	0.0648	0.0373	0.3503	0.2713	0.5051	0.4104	0.0192	0.1119	0.1576	0.1951	0.4426	0.3147	0.0555	0.1787	0.067	0.1462	0.2153	0.4519	0.4764	0.4085	0.3217	0.0644	0.4719	0.0352	0.0741	0.0723	0.0095	0.0406	0.1014	0.2121
Fit1	0.3049	0.2846	0.0644	0.1915	0.2286	0.435	0.0859	0.1608	0.2613	0.0011	0.287	0.1783	0.3693	0.1393	0.3547	0.1279	0.269	0.1769	0.2992	0.0721	0.1178	0.0414	0.1499	0.4444	0.3556	0.1987	0.0005	0.3998	0.0999	0.0548	0.0007	0.0162	0.0133	0.4073	0.0124	0.0905	0.0741	0.1534	0.2277	0.0518	0.3678	0.1231	0.1553	0.1888	0.4909	0.0892	0.0304	0.2	0.3054
Myo95E	0.3597	0.3549	0.1824	0.0232	0.4826	0.3384	0.0184	0.0359	0.4418	0.0031	0.2445	0.0218	0.33	0.1053	0.3552	0.1098	0.1237	0.1829	0.4374	0.1072	0.5029	0.063	0.1069	0.2759	0.159	0.0519	0.0028	0.4123	0.0097	0.2692	0.0172	0.0019	0.0133	0.269	0.0602	0.2447	0.2578	0.4641	0.3399	0.3535	0.1407	0.2845	0.0094	0.4902	0.4226	0.0399	0.0015	0.0591	0.1407
glob1	0.4807	0.4561	0.4289	0.3183	0.3385	0.1383	0.4784	0.1533	0.43	0.4854	0.3108	0.1957	0.2629	0.3378	0.1043	0.3285	0.3755	0.4693	0.2863	0.3871	0.0102	0.3653	0.3478	0.121	0.1777	0.1991	0.4347	0.2882	0.2542	0.1354	0.1493	0.3956	0.4038	0.0989	0.4653	0.206	0.1726	0.1342	0.2966	0.0505	0.1706	0.0486	0.0849	0.0334	0.3693	0.3191	0.3868	0.2497	0.1528
bbx	0.1925	0.3979	0.0544	0.0241	0.4647	0.2836	0.0934	0.0044	0.1323	0.0516	0.1316	0.2648	0.0449	0.2421	0.2079	0.2078	0.4033	0.2885	0.2944	0.2717	0.4323	0.0105	0.2336	0.1464	0.005	0.0359	0.0503	0.0803	0.0198	0.3535	0.266	0.2448	0.0076	0.278	0.0043	0.4499	0.2452	0.2066	0.0355	0.4285	0.3845	0.5091	0.0707	0.1908	0.1495	0.2659	0.0921	0.0015	0.0497
klar	0.427	0.0711	0.2232	0.0194	0.4769	0.4283	0.3482	0.3927	0.1689	0.0904	0.3815	0.1648	0.2709	0.0085	0.0968	0.0104	0.0638	0.174	0.0237	0.0859	0.2477	0.4159	0.2858	0.0591	0.455	0.0059	0.0696	0.2657	0.3799	0.4756	0.2495	0.0489	0.1087	0.0753	0.1795	0.1836	0.325	0.2444	0.4566	0.303	0.0288	0.0867	0.1471	0.3884	0.0549	0.0005	0.0077	0.0702	0.3628
nst	0.0384	0.2195	0.0873	0.3542	0.4863	0.1212	0.4156	0.081	0.1181	0.4974	0.1329	0.1042	0.3293	0.2683	0.1147	0.4547	0.0155	0.4564	0.0749	0.4373	0.2372	0.0712	0.4104	0.0366	0.0712	0.3897	0.3812	0.0849	0.2526	0.3618	0.4405	0.2545	0.2353	0.0398	0.1947	0.1331	0.4277	0.2827	0.0159	0.3506	0.0323	0.301	0.4338	0.3997	0.0368	0.194	0.2693	0.2004	0.3649
eEF2	0.0257	0.3208	0.4107	0.2244	0.4019	0.3224	0.2385	0.2446	0.2223	0.3217	0.1695	0.3189	0.1641	0.2344	0.3519	0.188	0.4959	0.243	0.1186	0.0731	0.3532	0.4454	0.4418	0.1234	0.019	0.3015	0.304	0.1109	0.2741	0.0089	0.0471	0.2575	0.4883	0.4702	0.4214	0.0113	0.0408	0.1955	0.4763	0.01	0.4435	0.0544	0.4046	0.4064	0.127	0.1984	0.4673	0.0927	0.1314
CG11034	0.3574	0.3659	0.2013	0.0191	0.2063	0.4959	0.3561	0.325	0.2332	0.434	0.2198	0.2157	0.0979	0.1189	0.2233	0.1234	0.2637	0.4371	0.2617	0.4411	0.0564	0.4847	0.2944	0.2868	0.2291	0.0127	0.4257	0.4743	0.3102	0.0763	0.1938	0.4271	0.3113	0.143	0.4021	0.4284	0.0921	0.482	0.4469	0.0243	0.1255	0.3569	0.17	0.3133	0.2943	0.0934	0.141	0.0808	0.1505
CG31937	0.1332	0.4454	0.498	0.1351	0.2429	0.5249	0.2097	0.04	0.3934	0.3781	0.4533	0.3333	0.4177	0.3953	0.2673	0.2976	0.4153	0.3374	0.1912	0.4645	0.1055	0.3631	0.5192	0.0904	0.0272	0.1414	0.4674	0.3195	0.0826	0.1484	0.2015	0.3503	0.2754	0.2711	0.3063	0.0796	0.1907	0.2037	0.4025	0.0482	0.2893	0.0903	0.0391	0.1165	0.3605	0.3343	0.2393	0.0473	0.1796
CG7879	0.1679	0.4567	0.3322	0.1132	0.2619	0.2829	0.1531	0.3877	0.2482	0.3258	0.0625	0.1877	0.0783	0.0579	0.3821	0.0397	0.2541	0.1099	0.1897	0.0545	0.2683	0.1307	0.3252	0.1786	0.3882	0.1079	0.2562	0.4875	0.4576	0.4829	0.3137	0.4467	0.1779	0.3755	0.1028	0.0276	0.2528	0.0242	0.0912	0.3004	0.3768	0.0065	0.4528	0.2764	0.3318	0.113	0.3398	0.2666	0.341
CG45092	0.342	0.2257	0.0964	0.0527	0.2754	0.3644	0.0322	0.1007	0.2767	0.0006	0.3181	0.0901	0.2835	0.0687	0.4765	0.0974	0.1734	0.1356	0.2649	0.0731	0.3035	0.0516	0.1871	0.5172	0.2443	0.0469	0	0.4322	0.0489	0.1898	0.0053	0.0072	0.0101	0.3696	0.0136	0.1135	0.1807	0.1987	0.2711	0.2102	0.1975	0.1503	0.0738	0.2384	0.4115	0.0459	0.0067	0.0606	0.1501
Cisd2	0.4347	0.4872	0	0.3196	0.217	0.4282	0.2406	0.0424	0.0467	0.0522	0.2881	0.411	0.2754	0.2287	0.1658	0.2176	0.1886	0.3993	0.3866	0.0931	0.2218	0.0011	0.2802	0.1939	0.115	0.2051	0.0372	0.235	0.1044	0.1515	0.052	0.2431	0.029	0.1592	0.0004	0.2311	0.3426	0.0547	0.0165	0.0933	0.2338	0.3869	0.2186	0.142	0.1849	0.3339	0.241	0.078	0.2194
alpha-Est10	0.2291	0.0234	0.3278	0.1552	0.112	0.0592	0.0646	0.1112	0.4248	0.2503	0.2682	0.2679	0.0649	0.0641	0.0458	0.1871	0.4088	0.4068	0.0028	0.0831	0.1255	0.2232	0.0043	0.0741	0.0312	0.3121	0.4038	0.0008	0.0242	0.2251	0.4243	0.4447	0.1914	0.1023	0.4727	0.1036	0.2413	0.116	0.2808	0.4453	0.2353	0.2896	0.2211	0.264	0.0111	0.2258	0.3354	0.3658	0.1636
ABCD	0.3211	0.4754	0.4812	0.038	0.1173	0.4452	0.198	0.0199	0.3419	0.1614	0.4951	0.1198	0.3462	0.1951	0.2024	0.0867	0.3297	0.4309	0.3221	0.2453	0.096	0.2379	0.4632	0.2158	0.0743	0.0647	0.2781	0.3822	0.0443	0.3181	0.4496	0.1608	0.1233	0.2304	0.1865	0.2757	0.3178	0.3158	0.3089	0.1461	0.1908	0.2861	0.0026	0.0756	0.4598	0.0973	0.0814	0.0454	0.2127
RpL30	0.4084	0.166	0.0127	0.1708	0.2068	0.1433	0.2659	0.0092	0.383	0.0623	0.1488	0.1868	0.1524	0.2872	0.1458	0.1065	0.1122	0.1675	0.2155	0.0951	0.4395	0.0005	0.1823	0.1403	0.1368	0.2915	0.129	0.1455	0.0606	0.2312	0.1165	0.349	0.0199	0.1037	0.0143	0.2259	0.4418	0.1542	0.0091	0.1017	0.1402	0.1915	0.0694	0.3403	0.1674	0.2191	0.2941	0.166	0.2971
Npc1a	0.3539	0.3179	0.0756	0.2901	0.4748	0.0831	0.1104	0.1446	0.2927	0.0233	0.3889	0.4491	0.1684	0.4158	0.0618	0.4564	0.4176	0.2671	0.3966	0.4193	0.0051	0.0216	0.0644	0.4896	0.2396	0.456	0.0505	0.0599	0.0948	0.0675	0.0135	0.1524	0.0047	0.0661	0.0485	0.3192	0.1227	0.2087	0.0702	0.0276	0.2088	0.1763	0.3242	0.0799	0.1228	0.4604	0.1638	0.2793	0.4546
GlyS	0.2349	0.1369	0.1926	0.234	0.3265	0.1243	0.0002	0.3473	0.5021	0.1934	0.0512	0.3752	0.3081	0.3334	0.0917	0.344	0.026	0.0204	0.432	0.4252	0.381	0.2107	0.4964	0.352	0.2714	0.1852	0.2425	0.3952	0.223	0.3606	0.4507	0.0766	0.3704	0.079	0.435	0.1641	0.3379	0.0865	0.1054	0.0738	0.0408	0.15	0.1418	0.1439	0.2606	0.1786	0.0857	0.1907	0.3163
Keap1	0.4243	0.1287	0.183	0.2942	0.2497	0.0099	0.3545	0.34	0.4609	0.3617	0.0107	0.4256	0.01	0.4308	0.0152	0.4249	0.0881	0.1874	0.3779	0.4744	0.1134	0.0388	0.2579	0.347	0.3799	0.4567	0.4061	0.0484	0.3773	0.3704	0.2589	0.2648	0.1084	0.0089	0.1535	0.2538	0.366	0.0588	0.008	0.1094	0.0322	0.1099	0.3274	0.0497	0.1081	0.3846	0.4167	0.3577	0.4288
mRpL42	0.3294	0.0723	0.1462	0.0905	0.0382	0.0889	0.2566	0.0223	0.2766	0.0447	0.284	0.067	0.1357	0.4289	0.1895	0.1166	0.3701	0.1947	0.1923	0.2418	0.36	0.0155	0.0539	0.2854	0.1914	0.4232	0.1616	0.1011	0.0175	0.2441	0.0917	0.2061	0.0224	0.1421	0.0895	0.2922	0.4802	0.3831	0.0362	0.1298	0.2855	0.2593	0.0301	0.4585	0.1882	0.1992	0.1625	0.3205	0.3583
kud	0.409	0.001	0.0901	0.3814	0.1397	0.1614	0.1827	0.0847	0.2242	0.381	0.2068	0.2713	0.1738	0.0458	0.0206	0.1877	0.2305	0.2577	0.0006	0.1396	0.2378	0.1412	0.0039	0.0126	0.0327	0.1943	0.5008	0.0086	0.0397	0.2938	0.4844	0.3457	0.3195	0.0308	0.4038	0.2051	0.1521	0.2014	0.1695	0.3758	0.0622	0.1454	0.2711	0.2534	0.0011	0.1206	0.3723	0.4771	0.1428
CG1635	0.1248	0.1294	0.1666	0.2509	0.2521	0.2454	0.0128	0.01	0.1724	0.2114	0.4124	0.3691	0.304	0.2078	0.2541	0.4389	0.4553	0.3399	0.0298	0.2875	0.487	0.1572	0.0564	0.0095	0.0004	0.4385	0.3686	0.0499	0.0062	0.2831	0.4263	0.3672	0.1952	0.2765	0.2292	0.0551	0.2652	0.1863	0.2036	0.2936	0.3659	0.1066	0.0834	0.4337	0.0324	0.3413	0.3279	0.1195	0.1519
alpha-Est1	0.2454	0.1563	0.4201	0.4034	0.1838	0.1003	0.4255	0.2778	0.1224	0.3849	0.4439	0.4411	0.2875	0.2033	0.1189	0.4363	0.5296	0.256	0.4401	0.3677	0.0313	0.3915	0.114	0.1683	0.1648	0.0767	0.506	0.2277	0.4537	0.1401	0.1223	0.489	0.373	0.0702	0.3514	0.2206	0.2012	0.4459	0.3517	0.0328	0.1971	0.0212	0.2906	0.2537	0.3446	0.427	0.4575	0.0932	0.138
CG7530	0.1863	0.0465	0.4833	0.2083	0.3	0.2923	0.46	0.2918	0.2918	0.1326	0.4529	0.3334	0.422	0.0031	0.3152	0.015	0.2524	0.3306	0.0324	0.0094	0.4247	0.3123	0.2825	0.1017	0.1311	0.1202	0.0398	0.2239	0.3209	0.0953	0.07	0.1301	0.1429	0.3157	0.0959	0.0093	0.141	0.0229	0.3621	0.1929	0.1411	0.0375	0.4465	0.2959	0.0498	0.0069	0.0757	0.2624	0.366
aralar1	0.1868	0.0719	0.3052	0.1611	0.1988	0.0213	0.0832	0.148	0.4324	0.1369	0.2765	0.3783	0.0392	0.1137	0.0286	0.1926	0.388	0.2722	0.053	0.1373	0.0234	0.1532	0.0078	0.2115	0.0545	0.3254	0.2658	0	0.0427	0.414	0.2406	0.3484	0.0825	0.0714	0.4096	0.1955	0.4548	0.3056	0.1916	0.3649	0.1982	0.5288	0.2925	0.1375	0.0144	0.2521	0.2485	0.3193	0.3051
Pld3	0.0067	0.3489	0.4804	0.2887	0.2238	0.4331	0.234	0.4485	0.1148	0.2454	0.1306	0.1374	0.1577	0.5104	0.3762	0.1945	0.3055	0.141	0.5084	0.1969	0.4488	0.4503	0.2461	0.3578	0.0793	0.1336	0.411	0.3006	0.4891	0.0917	0.1028	0.2349	0.5024	0.4303	0.3962	0.07	0.1251	0.3529	0.3091	0.0423	0.3216	0.1966	0.285	0.1726	0.3153	0.219	0.4467	0.0762	0.2327
RpL39	0.1701	0.0801	0.1131	0.3774	0.3448	0.2119	0.3591	0.0864	0.0849	0.3776	0.0633	0.4426	0.194	0.1927	0.1108	0.2586	0.074	0.3195	0.037	0.2245	0.3653	0.1822	0.2814	0.0266	0.008	0.441	0.3629	0.0689	0.1465	0.0763	0.1667	0.1486	0.3851	0.1229	0.2746	0.1153	0.0202	0.3935	0.1113	0.2274	0.0709	0.1126	0.3137	0.2796	0.0141	0.111	0.2641	0.1658	0.1053
Sxl	0.2653	0.1247	0.1103	0.0299	0.1162	0.0599	0.0433	0.0018	0.4363	0.0244	0.1842	0.1645	0.0445	0.4697	0.1185	0.2233	0.4295	0.4629	0.1256	0.3965	0.2444	0.0059	0.0389	0.1597	0.0178	0.239	0.0982	0.0184	0.0013	0.4429	0.1474	0.1879	0.0033	0.1163	0.0352	0.4078	0.4094	0.3931	0.0178	0.3231	0.3011	0.4212	0.0207	0.3661	0.0768	0.292	0.09	0.0583	0.1983
CG31915	0.2106	0.1236	0.4894	0.5214	0.3374	0.1966	0.1107	0.4763	0.3908	0.4291	0.4221	0.4759	0.3576	0.0188	0.1031	0.0781	0.2417	0.2177	0.02	0.0269	0.0521	0.4216	0.025	0.1647	0.1906	0.1135	0.4234	0.0312	0.1794	0.3192	0.4581	0.495	0.527	0.1804	0.2019	0.056	0.484	0.0177	0.3858	0.4794	0.3069	0.173	0.4198	0.3069	0.0519	0.1293	0.467	0.3317	0.3966
Vps4	0.4713	0.0202	0.2662	0.3732	0.1599	0.0111	0.0523	0.513	0.4766	0.1553	0.0032	0.3266	0.0727	0.151	0.0221	0.1833	0.0192	0.0344	0.072	0.1885	0.3502	0.2216	0.3047	0.3034	0.3901	0.1595	0.1493	0.0821	0.4378	0.3114	0.2557	0.0169	0.384	0.0197	0.4016	0.5048	0.0734	0.2759	0.0852	0.3274	0.0084	0.3607	0.1768	0.1348	0.0406	0.1238	0.0659	0.3205	0.4384
NKAIN	0.3	0.4035	0.1439	0.0583	0.4857	0.4477	0.0526	0.0763	0.4352	0.0005	0.2506	0.0456	0.309	0.1482	0.4591	0.0958	0.115	0.1803	0.3805	0.1024	0.2236	0.0571	0.0798	0.4759	0.2638	0.1416	0.0004	0.3378	0.0261	0.1436	0.0015	0.0034	0.0079	0.4757	0.0375	0.1653	0.1362	0.3464	0.2876	0.1486	0.1983	0.1574	0.0329	0.3432	0.4894	0.0427	0.0041	0.1563	0.2068
Dad	0.2262	0.3727	0.2069	0.426	0.4382	0.2909	0.1001	0.1349	0.2649	0.099	0.2055	0.4234	0.3505	0.185	0.2297	0.2842	0.4009	0.1181	0.1315	0.3	0.0148	0.1903	0.0839	0.1159	0.2218	0.2004	0.2025	0.1279	0.0982	0.0631	0.0676	0.1147	0.1156	0.1802	0.3297	0.2591	0.0472	0.3436	0.2656	0.1194	0.2896	0.4322	0.217	0.5406	0.1415	0.3099	0.268	0.4342	0.3319
PNUTS	0.492	0.074	0.3378	0.1477	0.2535	0.2057	0.0172	0.1254	0.4355	0.0073	0.0616	0.1947	0.3392	0.0657	0.1303	0.0625	0.0864	0.0482	0.1727	0.077	0.4498	0.2288	0.4166	0.4946	0.3455	0.0673	0.0098	0.3142	0.0885	0.1097	0.026	0.0003	0.0481	0.1417	0.0879	0.3138	0.0413	0.4145	0.4683	0.35	0.0546	0.33	0.0358	0.2977	0.1838	0.0175	0.004	0.0851	0.4015
mRpL35	0.452	0.273	0.1093	0.0626	0.2357	0.1006	0.0705	0.017	0.4961	0.0047	0.3853	0.1579	0.1042	0.3474	0.1687	0.1127	0.4444	0.3762	0.3397	0.2145	0.1097	0.0053	0.0447	0.3646	0.1303	0.2856	0.0204	0.066	0.0112	0.1317	0.0138	0.0523	0.0003	0.1527	0.0198	0.3111	0.2194	0.2585	0.0389	0.0914	0.3737	0.1631	0.0371	0.3158	0.2014	0.137	0.0318	0.1304	0.3708
CG32533	0.4704	0.255	0.2188	0.3793	0.3767	0.0562	0.0215	0.4514	0.4659	0.2816	0.011	0.2353	0.1482	0.4816	0.1035	0.4542	0.0106	0.0601	0.4511	0.337	0.3796	0.1257	0.3045	0.3224	0.4025	0.4064	0.2991	0.3157	0.2498	0.3841	0.4949	0.078	0.4255	0.0654	0.2404	0.2249	0.2984	0.0165	0.0325	0.1626	0.037	0.1448	0.1717	0.1299	0.2602	0.2768	0.1448	0.5127	0.2964
Mondo	0.438	0.1338	0.3228	0.4785	0.4304	0.2119	0.3264	0.2213	0.13	0.2452	0.4764	0.3272	0.5128	0.1272	0.4124	0.0857	0.4377	0.3587	0.0964	0.1328	0.2044	0.4029	0.2461	0.0571	0.0733	0.3934	0.3252	0.304	0.1937	0.0233	0.1533	0.2571	0.2627	0.4165	0.409	0.1396	0.0258	0.085	0.2868	0.1332	0.4951	0.0424	0.2248	0.5082	0.1305	0.1107	0.2846	0.4835	0.0636
CG1983	0.3303	0.4474	0.1552	0.1237	0.1762	0.3218	0.247	0.2515	0.335	0.435	0.453	0.2073	0.451	0.4832	0.1465	0.4356	0.1765	0.4055	0.2954	0.2918	0.0339	0.2407	0.4838	0.2431	0.1457	0.1751	0.3659	0.4866	0.2419	0.0295	0.0805	0.4283	0.4137	0.0902	0.3095	0.0932	0.0976	0.0606	0.2209	0.002	0.1038	0.0771	0.1009	0.1177	0.4201	0.3591	0.2756	0.2073	0.1364
lncRNA:CR43314	0.4543	0.3371	0.0365	0.1575	0.4495	0.161	0.0955	0.0865	0.2296	0.004	0.2923	0.2984	0.0913	0.4086	0.0597	0.3184	0.4262	0.3106	0.4426	0.2755	0.0353	0.0051	0.0611	0.4507	0.1607	0.336	0.0094	0.0733	0.057	0.1308	0.0128	0.1341	0.0007	0.0863	0.0084	0.2144	0.2356	0.1173	0.0405	0.0482	0.2551	0.1539	0.2479	0.042	0.1352	0.3293	0.1082	0.1782	0.3082
Sfxn2	0.3923	0.1265	0.3028	0.4847	0.4309	0.2675	0.1908	0.4045	0.2264	0.4564	0.3806	0.4846	0.2078	0.0327	0.0224	0.0163	0.3773	0.3142	0.1175	0.0412	0.0274	0.5025	0.0239	0.2544	0.2736	0.139	0.4335	0.0477	0.3043	0.3092	0.3831	0.3995	0.5096	0.097	0.2929	0.3057	0.3703	0.2164	0.4447	0.3597	0.2015	0.3532	0.2344	0.0449	0.0403	0.0774	0.4109	0.3145	0.2438
CG6195	0.1138	0.0509	0.1132	0.3149	0.3353	0.0089	0.3141	0.1888	0.1894	0.4475	0.0121	0.2902	0.0188	0.1303	0.0005	0.2083	0.0906	0.4378	0.0678	0.1784	0.0639	0.0623	0.1102	0.1836	0.0545	0.3808	0.4835	0.002	0.1993	0.3234	0.4909	0.1891	0.1772	0.0012	0.258	0.2493	0.1673	0.2878	0.0176	0.3544	0.0034	0.4743	0.3945	0.0303	0.0026	0.1059	0.3508	0.2486	0.2992
mthl10	0.2219	0.2324	0.2483	0.3197	0.4644	0.0531	0.1045	0.314	0.3295	0.106	0.3963	0.462	0.1128	0.1612	0.0344	0.1929	0.3948	0.158	0.1989	0.1869	0.0009	0.1571	0.0358	0.4067	0.1997	0.2774	0.1678	0.014	0.1212	0.3162	0.1053	0.2861	0.0855	0.0761	0.3458	0.3801	0.2691	0.5126	0.2171	0.1576	0.2024	0.2547	0.5107	0.0425	0.0528	0.2546	0.2619	0.3839	0.4892
CG6983	0.4009	0.0089	0.4755	0.4592	0.0631	0.0904	0.2212	0.4807	0.4316	0.0722	0.034	0.4334	0.1552	0.0457	0.0833	0.105	0.0854	0.0494	0.0192	0.0521	0.3782	0.4557	0.3349	0.159	0.2496	0.161	0.0467	0.0952	0.4891	0.046	0.0421	0.0122	0.2018	0.0998	0.1982	0.1645	0.0073	0.2541	0.3076	0.2388	0.0453	0.1784	0.2887	0.3921	0.0529	0.0378	0.0569	0.3057	0.3229
CG4806	0.4944	0.1067	0.1266	0.2519	0.3472	0.3913	0.0265	0.0748	0.1293	0.2525	0.4634	0.1042	0.3606	0.2159	0.2669	0.3163	0.3689	0.4556	0.0405	0.2915	0.405	0.2897	0.0198	0.0155	0.0209	0.4734	0.2961	0.1426	0.0148	0.1528	0.4566	0.3616	0.3417	0.4328	0.3273	0.211	0.1526	0.1083	0.4708	0.3057	0.5141	0.0864	0.1229	0.4062	0.0789	0.3503	0.3635	0.3359	0.0201
L2HGDH	0.3533	0.107	0.087	0.3093	0.4381	0.0512	0.3813	0.4447	0.3601	0.4819	0.0982	0.3669	0.166	0.2286	0.0086	0.28	0.0818	0.1534	0.3122	0.4101	0.0415	0.1042	0.2032	0.4434	0.4121	0.1459	0.4973	0.1287	0.5046	0.1984	0.1852	0.2093	0.3412	0.0077	0.3166	0.1991	0.4659	0.1144	0.0666	0.013	0.0168	0.1491	0.1743	0.0081	0.0921	0.1895	0.2005	0.2565	0.3517
NHP2	0.2007	0.0452	0.0141	0.3549	0.3512	0.3194	0.2561	0.1528	0.1859	0.1614	0.2611	0.1337	0.1859	0.2526	0.0216	0.337	0.2542	0.2236	0.0675	0.4749	0.1598	0.0518	0.0151	0.089	0.1845	0.3119	0.1784	0.0741	0.0854	0.4178	0.1243	0.4587	0.2024	0.0513	0.1833	0.259	0.3333	0.4295	0.1428	0.0833	0.1076	0.4312	0.3605	0.0636	0.0404	0.315	0.5033	0.4456	0.1141
Hnf4	0.3929	0.0182	0.1912	0.2253	0.2093	0.0919	0.1004	0.2327	0.3083	0.3086	0.1759	0.273	0.0494	0.0537	0.0055	0.1246	0.4915	0.48	0.0193	0.079	0.0666	0.193	0.0009	0.1473	0.0776	0.2477	0.3579	0.002	0.067	0.2427	0.3514	0.4247	0.2507	0.0306	0.4718	0.2873	0.1907	0.2644	0.2583	0.3771	0.1234	0.3854	0.4423	0.0647	0.0074	0.1522	0.4664	0.4995	0.1167
kel	0.4301	0.1755	0.3805	0.0655	0.4518	0.3204	0.0263	0.1169	0.4353	0.003	0.0844	0.0909	0.4883	0.1057	0.2266	0.0694	0.0338	0.0551	0.2625	0.1164	0.3562	0.2111	0.1882	0.4138	0.3218	0.0939	0.0064	0.476	0.0435	0.1478	0.0171	0	0.024	0.1938	0.1015	0.297	0.0703	0.4818	0.4902	0.3303	0.057	0.2175	0.0197	0.3365	0.2652	0.0176	0.0009	0.129	0.3366
CG30022	0.07	0.0542	0.3084	0.3842	0.2344	0.164	0.1275	0.1164	0.2283	0.3564	0.3245	0.2938	0.3838	0.0206	0.1621	0.1063	0.183	0.5005	0.0064	0.0458	0.3807	0.3245	0.1362	0.0329	0.0263	0.1901	0.1989	0.0526	0.1103	0.3123	0.2256	0.2531	0.4317	0.1008	0.4755	0.0113	0.2574	0.144	0.2232	0.3334	0.0741	0.0975	0.2492	0.4278	0.0078	0.0418	0.2663	0.3918	0.4007
syd	0.2054	0.2828	0.145	0.0091	0.4278	0.2241	0.055	0.0895	0.3826	0.0032	0.4122	0.0073	0.2855	0.0502	0.3379	0.1037	0.1913	0.2917	0.2761	0.076	0.3177	0.0804	0.3255	0.3652	0.2286	0.0177	0.0027	0.4705	0.0455	0.3833	0.0471	0.0283	0.0422	0.2195	0.0419	0.0629	0.4507	0.2709	0.288	0.3956	0.1575	0.217	0.0616	0.319	0.3354	0.0406	0.0167	0.0516	0.0702
Ubr1	0.3325	0.2813	0.1171	0.0306	0.4391	0.3446	0.1781	0.1103	0.4822	0.01	0.4386	0.1155	0.1819	0.0359	0.4965	0.0493	0.3109	0.3229	0.1555	0.0428	0.3871	0.0167	0.3591	0.3323	0.339	0.0377	0.0036	0.4167	0.0924	0.1572	0.0055	0.0434	0.0053	0.526	0.0083	0.0299	0.2425	0.0288	0.0739	0.1454	0.269	0.0081	0.1076	0.2239	0.3773	0.0348	0.019	0.0463	0.2742
CG13907	0.434	0.0373	0.0058	0.3521	0.2253	0.1168	0.2239	0.0153	0.2071	0.1472	0.2595	0.2337	0.2139	0.2054	0.0328	0.3088	0.2073	0.2391	0.0045	0.3804	0.1154	0.0214	0.0161	0.0026	0.0897	0.2534	0.2257	0.0238	0.0421	0.308	0.1157	0.4108	0.0913	0.042	0.1194	0.4756	0.4489	0.5386	0.0733	0.0712	0.0766	0.5938	0.1736	0.2334	0.0115	0.2742	0.468	0.4203	0.2775
CG3262	0.227	0.0511	0.1861	0.1865	0.4577	0.3655	0.348	0.4554	0.1542	0.1813	0.3584	0.3706	0.4358	0.0602	0.1373	0.0266	0.1974	0.1076	0.0417	0.1518	0.4227	0.399	0.2078	0.0563	0.3612	0.1002	0.2097	0.3283	0.4995	0.1619	0.2165	0.0929	0.1151	0.2299	0.2467	0.381	0.0799	0.1795	0.3755	0.4937	0.1315	0.0808	0.2912	0.2901	0.1002	0.0274	0.0504	0.1277	0.1391
CG7484	0.1799	0.0391	0.1217	0.2465	0.2929	0.2156	0.0311	0.0603	0.1083	0.3079	0.2627	0.3456	0.1644	0.0719	0.0573	0.1538	0.4345	0.3929	0.0075	0.0973	0.2976	0.1786	0.0128	0.0109	0.0015	0.431	0.3861	0.0067	0.0147	0.1562	0.4178	0.4653	0.2471	0.112	0.317	0.0836	0.1329	0.1729	0.2465	0.331	0.1896	0.1039	0.1965	0.2285	0.0019	0.1385	0.4445	0.2298	0.0665
Tango2	0.1925	0.3918	0.4625	0.3954	0.2607	0.3295	0.0493	0.4776	0.149	0.4765	0.1923	0.387	0.4031	0.0672	0.2905	0.0534	0.1263	0.0449	0.1117	0.0577	0.1218	0.2875	0.1008	0.1308	0.1789	0.2152	0.4601	0.2028	0.2465	0.2963	0.4864	0.3807	0.3758	0.4308	0.2323	0.0578	0.4297	0.0372	0.1543	0.3216	0.4711	0.0273	0.4338	0.3335	0.1515	0.1354	0.474	0.4511	0.2731
Nf1	0.2463	0.1065	0.3808	0.0721	0.3881	0.1207	0.5511	0.1842	0.4574	0.0981	0.3615	0.0933	0.5648	0	0.1071	0.0165	0.2316	0.3884	0.0316	0.0099	0.1092	0.1843	0.1805	0.3309	0.483	0.0038	0.0698	0.1481	0.2757	0.303	0.1784	0.0765	0.1359	0.1376	0.0949	0.037	0.3882	0.1019	0.3492	0.4825	0.1409	0.129	0.1097	0.3101	0.0674	0.0058	0.0515	0.0641	0.2723
cindr	0.2891	0.1995	0.4195	0.163	0.2929	0.4086	0.3454	0.1728	0.1334	0.0644	0.1484	0.1192	0.332	0.0458	0.0656	0.0041	0.1907	0.4158	0.1383	0.0456	0.2511	0.2622	0.3596	0.2773	0.3983	0.1201	0.1267	0.2135	0.2058	0.1031	0.0951	0.0213	0.1052	0.1537	0.1484	0.1877	0.0954	0.3998	0.415	0.3282	0.1151	0.1461	0.0345	0.0246	0.0768	0.0051	0.0367	0.2445	0.341
CG3223	0.4197	0.0221	0.0913	0.3083	0.381	0.0432	0.3971	0.4487	0.1971	0.3803	0.0727	0.3177	0.1377	0.045	0.0001	0.0984	0.0904	0.2107	0.0232	0.1506	0.0449	0.1716	0.0965	0.1457	0.2651	0.0788	0.352	0.023	0.3517	0.4531	0.4433	0.1069	0.4764	0.0023	0.5329	0.4254	0.2543	0.386	0.1252	0.1421	0.0033	0.5307	0.1905	0.0069	0.0042	0.036	0.1203	0.2834	0.4186
CG4364	0.2531	0.0925	0.0849	0.4207	0.4605	0.0796	0.4263	0.4144	0.0981	0.2786	0.0056	0.2041	0.0644	0.173	0.0054	0.17	0.021	0.2391	0.1019	0.2342	0.2043	0.15	0.3235	0.1759	0.1624	0.3313	0.3334	0.0576	0.5111	0.2438	0.3228	0.0468	0.473	0.0105	0.3664	0.404	0.0849	0.1952	0.0728	0.3833	0.0031	0.4993	0.1597	0.001	0.0175	0.057	0.1057	0.386	0.2648
Rift	0.1491	0.428	0.4531	0.4067	0.5182	0.2311	0.1537	0.0972	0.2075	0.4813	0.3035	0.4753	0.2742	0.5155	0.2043	0.4017	0.3706	0.2518	0.1728	0.4804	0.125	0.4665	0.4119	0.0699	0.0564	0.2618	0.4672	0.4785	0.1545	0.1965	0.1803	0.3755	0.4826	0.2028	0.3884	0.0545	0.2909	0.139	0.3621	0.0535	0.2118	0.0265	0.1067	0.0642	0.4005	0.5448	0.3716	0.1273	0.2245
pnt	0.3417	0.4126	0.2208	0.1028	0.4773	0.1795	0.0567	0.0997	0.3609	0.0075	0.4517	0.2659	0.1047	0.4528	0.1797	0.442	0.1319	0.0757	0.414	0.5608	0.025	0.092	0.0619	0.497	0.1419	0.3214	0.0045	0.0526	0.0555	0.2887	0.0215	0.0386	0.0046	0.2072	0.0802	0.4274	0.2183	0.4185	0.2002	0.2202	0.5372	0.1678	0.1267	0.11	0.225	0.2901	0.0133	0.1618	0.3129
CG12096	0.0224	0.4564	0.1391	0.3335	0.3533	0.0668	0.2647	0.1654	0.1426	0.3239	0.0584	0.1143	0.0891	0.4956	0.0793	0.4588	0.1258	0.2538	0.3292	0.5042	0.0963	0.0407	0.4383	0.2968	0.0792	0.312	0.3173	0.0602	0.2873	0.4034	0.3777	0.4053	0.079	0.0491	0.0963	0.2841	0.4856	0.084	0.0112	0.3716	0.0908	0.371	0.481	0.1089	0.0797	0.3584	0.4268	0.0469	0.482
l(2)efl	0.1787	0.4079	0.3773	0.2169	0.4936	0.3252	0.0279	0.132	0.2318	0.1115	0.2898	0.3834	0.393	0.1519	0.2145	0.1296	0.0396	0.012	0.1296	0.1343	0.0493	0.2916	0.0747	0.1135	0.0751	0.4124	0.1135	0.0426	0.0989	0.5327	0.215	0.1069	0.1095	0.2655	0.4461	0.1306	0.3373	0.0971	0.5043	0.4307	0.5422	0.3513	0.1579	0.3967	0.148	0.2989	0.0875	0.211	0.3706
LpR1	0.4963	0.3927	0.2814	0.3582	0.4665	0.4963	0.1137	0.1432	0.3901	0.0606	0.1101	0.2643	0.3603	0.2149	0.2935	0.2781	0.0549	0.1331	0.2131	0.2902	0.0511	0.2487	0.0492	0.1911	0.2628	0.2495	0.0755	0.1853	0.0984	0.151	0.0198	0.0411	0.1025	0.299	0.3988	0.4817	0.0784	0.1701	0.5047	0.2066	0.5062	0.5831	0.0884	0.5795	0.2538	0.4987	0.087	0.4599	0.5074
TSG101	0.0014	0.4948	0.1594	0.4326	0.3419	0.2459	0.1855	0.3039	0.4729	0.3429	0.4632	0.117	0.4385	0.2175	0.4114	0.3461	0.3939	0.14	0.2352	0.0911	0.4554	0.3365	0.4414	0.2989	0.1249	0.5024	0.2149	0.2011	0.3512	0.2265	0.1231	0.4306	0.4816	0.4606	0.3189	0.0036	0.4268	0.1649	0.5167	0.069	0.4433	0.141	0.3564	0.2351	0.2753	0.303	0.4637	0.1987	0.3039
CG17896	0.3226	0.1463	0.4594	0.2373	0.2744	0.1402	0.5629	0.2615	0.2842	0.3976	0.1551	0.302	0.054	0.2347	0.0479	0.2217	0.3265	0.4102	0.4078	0.1723	0.0887	0.427	0.0862	0.2065	0.4374	0.3204	0.3742	0.108	0.5022	0.3278	0.3387	0.3824	0.3744	0.1157	0.4081	0.2837	0.3076	0.4559	0.4551	0.3068	0.2726	0.0644	0.2124	0.0661	0.2341	0.3622	0.4517	0.2936	0.3111
mam	0.2549	0.4869	0.2164	0.1402	0.4655	0.3851	0.0004	0.0083	0.205	0.0208	0.2171	0.2341	0.4717	0.4166	0.3791	0.4479	0.0605	0.0198	0.1926	0.411	0.1836	0.1718	0.1037	0.056	0.0194	0.2611	0.0173	0.145	0.0099	0.4316	0.1214	0.0147	0.0243	0.4251	0.1065	0.2786	0.2909	0.2698	0.3648	0.4623	0.2443	0.2952	0.004	0.5677	0.2552	0.2922	0.0102	0.1329	0.177
CG2678	0.2969	0.1468	0.2995	0.0714	0.431	0.2208	0.3841	0.4215	0.2774	0.2114	0.2425	0.4624	0.0691	0.0823	0.4794	0.157	0.2632	0.167	0.0651	0.2798	0.3212	0.3246	0.3167	0.0522	0.4593	0.0548	0.1492	0.4336	0.4693	0.4759	0.2833	0.2777	0.0989	0.454	0.196	0.2527	0.3837	0.0855	0.2858	0.4618	0.3128	0.0447	0.4527	0.1913	0.2685	0.0974	0.0827	0.0895	0.4562
SCOT	0.3284	0.1411	0.2288	0.1002	0.4649	0.1139	0.4348	0.4261	0.3429	0.4676	0.4189	0.1255	0.4977	0.0397	0.0328	0.1167	0.173	0.4268	0.1764	0.1974	0.0053	0.3001	0.1353	0.3579	0.4427	0.0121	0.3479	0.1284	0.5073	0.1228	0.2421	0.2853	0.4832	0.0058	0.4149	0.3776	0.1889	0.4657	0.2204	0.0388	0.0142	0.4527	0.1742	0.2092	0.0701	0.0557	0.159	0.1575	0.1211
Ndfip	0.3837	0.2195	0.2167	0.2638	0.4372	0.4406	0.0747	0.0699	0.4847	0.0159	0.1817	0.3555	0.3836	0.1202	0.3021	0.0486	0.3121	0.1846	0.3389	0.061	0.2858	0.0648	0.3677	0.4656	0.3476	0.2026	0.0423	0.4897	0.0789	0.016	0.0141	0.0119	0.0177	0.4185	0.0454	0.3327	0.0172	0.2601	0.1676	0.1253	0.2424	0.2272	0.0397	0.255	0.3674	0.0517	0.0308	0.1297	0.3049
Usp47	0.3795	0.4979	0.0303	0.1061	0.4892	0.4489	0.0601	0.0206	0.3102	0.0023	0.3515	0.0878	0.3155	0.191	0.3516	0.1165	0.2929	0.2804	0.4323	0.0962	0.2077	0.0129	0.0653	0.225	0.1602	0.1982	0.0023	0.2631	0.0163	0.0946	0.0002	0.0158	0.0058	0.3532	0.0175	0.1992	0.1555	0.2878	0.1206	0.0844	0.3609	0.1932	0.0328	0.3277	0.3633	0.0932	0.025	0.1268	0.2353
Vps13B	0.4433	0.0629	0.4131	0.1068	0.3763	0.3411	0.2357	0.1618	0.3726	0.0482	0.245	0.2225	0.4937	0.0076	0.1109	0.0052	0.1893	0.1939	0.0405	0.0199	0.3267	0.1417	0.2559	0.2481	0.4859	0.0265	0.0425	0.2329	0.2064	0.1167	0.0479	0.012	0.0521	0.161	0.0742	0.1253	0.0873	0.1241	0.2843	0.347	0.1376	0.0694	0.0796	0.201	0.089	0.0025	0.0139	0.0537	0.5073
larp	0.1225	0.0597	0.0963	0.4165	0.3737	0.1995	0.0586	0.0611	0.0676	0.4436	0.2499	0.4667	0.2783	0.0797	0.0994	0.1291	0.1993	0.463	0.0137	0.1207	0.4482	0.1929	0.0833	0.0056	0.0007	0.4106	0.4628	0.0312	0.0448	0.1678	0.2793	0.3175	0.2984	0.1152	0.2925	0.0486	0.1188	0.2347	0.1873	0.298	0.1036	0.1067	0.196	0.2876	0.0025	0.0789	0.399	0.2002	0.1503
CG14931	0.1603	0.1165	0.1865	0.0919	0.4412	0.1119	0.3897	0.4453	0.1911	0.3779	0.3444	0.0737	0.4992	0.0145	0.0296	0.0558	0.1094	0.4721	0.0611	0.1155	0.0164	0.299	0.1549	0.1688	0.3485	0.019	0.2593	0.0849	0.4394	0.2288	0.4078	0.2098	0.4817	0.0059	0.415	0.18	0.3248	0.4379	0.192	0.1192	0.0057	0.333	0.2121	0.2304	0.0224	0.0128	0.1149	0.2517	0.1883
mle	0.5115	0.0662	0.4408	0.3092	0.3988	0.4071	0.3136	0.191	0.3238	0.0524	0.1904	0.4034	0.2764	0.0244	0.0943	0.0071	0.3219	0.2753	0.0832	0.02	0.4039	0.1815	0.2452	0.2463	0.3965	0.0994	0.1024	0.196	0.3284	0.0266	0.0667	0.0316	0.0746	0.208	0.0787	0.1975	0.0241	0.1429	0.2716	0.2328	0.1497	0.1417	0.0865	0.1218	0.0949	0.0179	0.0522	0.1416	0.1964
CG6805	0.3835	0.069	0.4827	0.0807	0.1872	0.0147	0.1058	0.3124	0.3058	0.1313	0.1615	0.1064	0.4537	0.0603	0.0992	0.2182	0.0377	0.0787	0.1447	0.1911	0.1787	0.4656	0.4106	0.5225	0.3041	0.0132	0.045	0.2096	0.2582	0.3263	0.3103	0.0486	0.2502	0.0256	0.2188	0.3355	0.4666	0.4371	0.1966	0.1756	0.0166	0.401	0.1415	0.4987	0.1276	0.06	0.03	0.0792	0.0588
RpI135	0.392	0.1835	0.1383	0.4429	0.4717	0.2481	0.1019	0.1146	0.0669	0.4336	0.484	0.2848	0.5228	0.2119	0.399	0.2322	0.4439	0.472	0.0857	0.3001	0.2729	0.3794	0.1552	0.0108	0.0271	0.4873	0.4655	0.2645	0.0738	0.1077	0.285	0.4758	0.516	0.5348	0.3402	0.1572	0.1214	0.1498	0.4543	0.227	0.5218	0.0644	0.1468	0.5008	0.1045	0.2122	0.4593	0.3139	0.0517
Amy-d	0.3755	0.2533	0.2628	0.0359	0.4303	0.3792	0.3612	0.108	0.5304	0.1163	0.4898	0.0701	0.2862	0.0067	0.1956	0.0126	0.3896	0.4604	0.2681	0.0307	0.1309	0.0963	0.3553	0.3913	0.329	0.0046	0.1066	0.3278	0.1182	0.3265	0.119	0.1161	0.0976	0.1844	0.0742	0.0396	0.4868	0.0227	0.1902	0.3595	0.1724	0.0498	0.108	0.3829	0.2796	0.0288	0.0823	0.0486	0.2996
Gclc	0.3104	0.2085	0.1917	0.3071	0.3615	0.0546	0.1169	0.171	0.3876	0.0751	0.4838	0.4344	0.1865	0.1963	0.0663	0.3224	0.4343	0.2211	0.1774	0.2675	0.0012	0.0917	0.0272	0.3602	0.2139	0.2576	0.1206	0.0188	0.0829	0.1455	0.0428	0.1683	0.033	0.0879	0.2362	0.4764	0.1718	0.5331	0.1578	0.068	0.1946	0.2127	0.2987	0.1455	0.069	0.3531	0.1995	0.3811	0.4299
GstE11	0.503	0.2925	0.2724	0.4839	0.3793	0.1091	0.2419	0.2331	0.3733	0.3852	0.0276	0.2479	0.0626	0.4026	0.0255	0.3181	0.1445	0.3029	0.4332	0.4133	0.0993	0.2567	0.4737	0.2532	0.4012	0.4074	0.5073	0.1789	0.2549	0.4718	0.4206	0.1268	0.4194	0.037	0.377	0.2099	0.3019	0.0541	0.1425	0.1934	0.0296	0.0785	0.0451	0.0016	0.2048	0.2257	0.2475	0.4429	0.4834
mRpL50	0.2476	0.2667	0.0292	0.2035	0.4246	0.068	0.1286	0.104	0.1551	0.0593	0.1299	0.4964	0.0505	0.4851	0.0201	0.4721	0.3063	0.3245	0.338	0.4365	0.0251	0.0046	0.0891	0.3769	0.1011	0.3644	0.0638	0.0323	0.0941	0.2475	0.0629	0.3229	0.0079	0.025	0.022	0.3783	0.3907	0.0948	0.0128	0.0998	0.1183	0.2386	0.3944	0.0115	0.0546	0.4798	0.2326	0.1357	0.3041
Cap-H2	0.4478	0.0611	0.2742	0.1767	0.1664	0.4829	0.3615	0.4385	0.4051	0.1111	0.3268	0.4507	0.2421	0.0063	0.4458	0.0206	0.5203	0.2079	0.046	0.0144	0.3348	0.1289	0.2256	0.153	0.4306	0.0285	0.0335	0.3696	0.4901	0.1881	0.1026	0.1831	0.0445	0.4864	0.0106	0.0899	0.1984	0.0047	0.1718	0.2511	0.4156	0.0401	0.5	0.1539	0.2153	0.0321	0.0915	0.0834	0.4706
Dlg5	0.4462	0.3776	0.2474	0.1652	0.4496	0.1276	0.2517	0.3859	0.4162	0.0453	0.3197	0.3924	0.0938	0.1739	0.2151	0.1301	0.4575	0.3045	0.1953	0.157	0.059	0.0685	0.2652	0.1573	0.452	0.2454	0.0308	0.2575	0.2871	0.0799	0.0157	0.1419	0.0116	0.2086	0.0414	0.0955	0.1359	0.0465	0.1118	0.0566	0.3695	0.0102	0.4566	0.0695	0.4877	0.1317	0.0864	0.2344	0.3974
SecS	0.376	0.0536	0.387	0.2248	0.1431	0.0207	0.0086	0.1655	0.2205	0.1043	0.0533	0.2638	0.2065	0.1031	0.0644	0.1894	0.0823	0.0239	0.2873	0.1684	0.2575	0.4569	0.4018	0.3197	0.2356	0.0525	0.0635	0.2081	0.1703	0.3963	0.2524	0.0181	0.2134	0.0432	0.183	0.4442	0.2057	0.3813	0.2551	0.2583	0.0301	0.2855	0.0652	0.2176	0.1758	0.0925	0.0374	0.0688	0.1939
CG12134	0.4978	0.119	0.266	0.1526	0.3305	0.3788	0.0585	0.1937	0.2888	0.1301	0.4926	0.1206	0.1515	0.1499	0.1047	0.1607	0.1494	0.2631	0.064	0.1525	0.1601	0.3034	0.0033	0.1179	0.0726	0.4143	0.1689	0.0322	0.0359	0.248	0.2799	0.2494	0.2283	0.2493	0.4833	0.3057	0.3326	0.1182	0.4827	0.4787	0.4283	0.2585	0.2139	0.1505	0.0658	0.3064	0.2051	0.4017	0.0372
nrv1	0.1722	0.2846	0.1814	0.4235	0.2945	0.1487	0.1078	0.4206	0.1598	0.2709	0.4328	0.2423	0.2705	0.111	0.0302	0.1416	0.4792	0.1471	0.2	0.1751	0.0001	0.2157	0.059	0.3369	0.2372	0.1858	0.2784	0.0444	0.2358	0.2765	0.1531	0.426	0.2335	0.0549	0.4242	0.3104	0.2304	0.4848	0.2785	0.1409	0.1642	0.4296	0.3264	0.0325	0.047	0.1535	0.4735	0.4814	0.4535
CG4080	0.137	0.4115	0.0965	0.3092	0.4796	0.2232	0.1431	0.2471	0.2651	0.4483	0.4129	0.298	0.2366	0.2479	0.4022	0.2312	0.0788	0.05	0.4441	0.0716	0.0852	0.2409	0.2945	0.1987	0.4693	0.415	0.4765	0.2085	0.4969	0.3702	0.4932	0.3479	0.4243	0.5114	0.2045	0.1788	0.3068	0.233	0.2684	0.2977	0.3345	0.3981	0.358	0.3247	0.4486	0.4278	0.2479	0.4751	0.3406
Scsalpha1	0.3883	0.245	0.1662	0.091	0.4873	0.3479	0.47	0.0974	0.4766	0.0697	0.4595	0.1987	0.2914	0.0213	0.3075	0.01	0.4953	0.4757	0.1417	0.0111	0.3814	0.0226	0.3205	0.4389	0.4048	0.0532	0.0614	0.4213	0.1697	0.1328	0.0327	0.0988	0.0295	0.3422	0.0188	0.0244	0.2548	0.0004	0.0458	0.2142	0.243	0.0045	0.1199	0.5112	0.2931	0.0471	0.0743	0.0523	0.4046
FBgn0000210	0.1411	0.2835	0.3617	0.2771	0.4615	0.4111	0.0319	0.2597	0.1816	0.1916	0.3924	0.454	0.2869	0.1235	0.1677	0.1254	0.1293	0.0486	0.0648	0.1234	0.0727	0.4077	0.0477	0.092	0.0486	0.3669	0.2537	0.0364	0.0907	0.2988	0.3619	0.2555	0.2814	0.2539	0.3931	0.0597	0.5044	0.0786	0.4349	0.3834	0.5549	0.1391	0.3375	0.2091	0.0682	0.1906	0.2409	0.2849	0.1673
CG10939	0.0908	0.2805	0.2021	0.2495	0.268	0.4554	0.13	0.2299	0.0115	0.2934	0.4952	0.2122	0.4161	0.047	0.2472	0.0159	0.3015	0.2557	0.0609	0.0566	0.4083	0.4925	0.2778	0.0208	0.0441	0.2742	0.3195	0.1877	0.2536	0.2161	0.1974	0.2625	0.3635	0.311	0.4596	0.0243	0.2537	0.1644	0.4524	0.2412	0.2525	0.0171	0.5563	0.3428	0.0371	0.0177	0.2165	0.3857	0.2379
CG9727	0.2568	0.2489	0.3208	0.0645	0.1434	0.0241	0.0799	0.0964	0.2866	0.0356	0.2589	0.3336	0.0571	0.4509	0.143	0.1944	0.418	0.3451	0.3488	0.383	0.0628	0.0313	0.0673	0.4665	0.1914	0.3656	0.1171	0.0374	0.0402	0.2005	0.0629	0.1487	0.0067	0.0963	0.122	0.4755	0.262	0.2799	0.0324	0.1666	0.3361	0.0914	0.1454	0.2885	0.1968	0.2334	0.0769	0.1602	0.4285
Fbxl4	0.3484	0.4447	0.096	0.478	0.1052	0.3351	0.3939	0.4296	0.0671	0.5053	0.0551	0.2245	0.1119	0.4122	0.0679	0.3581	0.1551	0.4253	0.3962	0.4408	0.1836	0.1675	0.4311	0.4578	0.3484	0.323	0.2895	0.2637	0.358	0.4275	0.4099	0.234	0.324	0.1204	0.1676	0.2757	0.3019	0.03	0.1456	0.3133	0.1128	0.2666	0.1168	0.0001	0.2197	0.2947	0.3564	0.2406	0.2494
CG42788	0.4902	0.335	0.2538	0.2141	0.1272	0.2777	0.2948	0.2802	0.053	0.3586	0.395	0.3788	0.4303	0.0625	0.1409	0.0013	0.4127	0.2777	0.196	0.0688	0.1554	0.3015	0.1601	0.1946	0.3425	0.1562	0.4804	0.3055	0.4842	0.2569	0.4389	0.31	0.2086	0.3292	0.25	0.2889	0.3588	0.1915	0.2041	0.4883	0.3257	0.1432	0.1596	0.0822	0.1386	0.0337	0.2301	0.255	0.1681
lncRNA:CR44779	0.3136	0.4827	0.2391	0.0885	0.2956	0.188	0.0482	0.0179	0.4341	0.0102	0.357	0.2355	0.2942	0.2849	0.4161	0.0781	0.2624	0.1838	0.4248	0.1901	0.1607	0.0327	0.1036	0.369	0.1555	0.245	0.031	0.167	0.0161	0.0843	0.0203	0.0144	0.003	0.3359	0.0479	0.4579	0.0979	0.3914	0.1086	0.1806	0.3647	0.1919	0.0136	0.3757	0.3599	0.0807	0.012	0.1018	0.4628
CG31793	0.4381	0.4886	0.3462	0.3395	0.3713	0.1719	0.2821	0.3196	0.4669	0.1701	0.3638	0.4936	0.132	0.4657	0.1056	0.4139	0.3651	0.2804	0.2845	0.4618	0.0106	0.2458	0.1877	0.1572	0.36	0.4282	0.1356	0.2011	0.4417	0.2003	0.0556	0.3178	0.1606	0.1501	0.3383	0.1699	0.1894	0.169	0.3016	0.0756	0.318	0.0404	0.2649	0.0152	0.3628	0.4913	0.2725	0.482	0.4136
Prps	0.1936	0.2443	0.1792	0.3519	0.4211	0.0722	0.107	0.0866	0.2932	0.0768	0.4406	0.496	0.3023	0.1753	0.1	0.2644	0.4436	0.1571	0.0979	0.239	0.0008	0.0989	0.0442	0.1533	0.1333	0.2584	0.1349	0.0161	0.0792	0.1503	0.0624	0.1448	0.0376	0.1235	0.222	0.3229	0.1668	0.4846	0.146	0.1231	0.2215	0.3328	0.2245	0.253	0.0484	0.2943	0.2039	0.2978	0.4297
Ziz	0.4452	0.1947	0.1087	0.1811	0.3238	0.1322	0.1087	0.0271	0.3335	0.012	0.4256	0.2102	0.2111	0.2256	0.1284	0.6032	0.3098	0.2294	0.1119	0.3584	0.0341	0.0702	0.0058	0.141	0.1084	0.3897	0.0332	0.0161	0.0222	0.2265	0.0203	0.0865	0.0078	0.1536	0.1245	0.5389	0.2654	0.4902	0.1537	0.1295	0.2948	0.2713	0.072	0.2639	0.0844	0.5084	0.0831	0.2568	0.352
CalpC	0.1367	0.4433	0.1638	0.0535	0.1759	0.1796	0.3347	0.5128	0.1071	0.2753	0.3269	0.0091	0.4258	0.1618	0.1012	0.1478	0.0131	0.4441	0.2326	0.3817	0.0479	0.2752	0.4036	0.2071	0.4689	0.1181	0.3021	0.2837	0.288	0.1693	0.4609	0.1755	0.506	0.019	0.3461	0.2889	0.2741	0.2328	0.1296	0.1349	0.0009	0.3341	0.1133	0.1871	0.1203	0.0375	0.0907	0.3748	0.1084
CG42514	0.0805	0.2219	0.0877	0.1778	0.3771	0.4819	0.1393	0.4362	0.4861	0.4556	0.405	0.3815	0.3287	0.5126	0.2513	0.3358	0.0819	0.032	0.4441	0.1281	0.4116	0.1507	0.3637	0.4619	0.2292	0.1901	0.5256	0.4168	0.4878	0.0564	0.1677	0.3692	0.4793	0.1564	0.2745	0.0835	0.3329	0.1775	0.1521	0.0082	0.1404	0.2081	0.4089	0.5147	0.4045	0.4336	0.2115	0.1508	0.288
CIAPIN1	0.3147	0.0108	0.268	0.2629	0.1234	0.1563	0.2915	0.2054	0.3664	0.1881	0.1671	0.3638	0.4388	0.047	0.1308	0.1813	0.0284	0.0621	0.0138	0.1581	0.4373	0.3511	0.2879	0.057	0.1715	0.0993	0.0662	0.1284	0.3299	0.3157	0.166	0.0653	0.3394	0.0732	0.3809	0.1201	0.1316	0.2699	0.163	0.4783	0.026	0.1152	0.4453	0.3735	0.027	0.049	0.0571	0.3277	0.5146
CG1628	0.3012	0.1617	0.3016	0.476	0.2251	0.155	0.0318	0.5231	0.4305	0.2089	0.0099	0.4793	0.1648	0.4514	0.1757	0.3579	0.0221	0.0134	0.4385	0.3143	0.3072	0.2071	0.2776	0.4284	0.4244	0.48	0.2368	0.4208	0.2768	0.3913	0.3274	0.0472	0.4342	0.1187	0.3394	0.2094	0.1006	0.0868	0.0689	0.3363	0.0865	0.1736	0.2354	0.2557	0.3365	0.3325	0.1231	0.4332	0.4657
CG16727	0.2287	0.1414	0.2867	0.3055	0.4073	0.0668	0.4221	0.3042	0.2553	0.3821	0.133	0.1387	0.1389	0.0412	0.0053	0.0314	0.2564	0.4558	0.2122	0.0615	0.0063	0.3556	0.1469	0.4519	0.3977	0.0973	0.3809	0.0461	0.4588	0.4824	0.4311	0.1663	0.5056	0.0086	0.3759	0.3443	0.4316	0.3915	0.2666	0.2042	0.0266	0.4209	0.0682	0.005	0.0388	0.029	0.1933	0.316	0.4208
Vang	0.4288	0.1752	0.1978	0.0537	0.3576	0.4043	0.3264	0.4345	0.1234	0.3423	0.2011	0.3051	0.1194	0.014	0.241	0.0211	0.3676	0.5046	0.0431	0.1262	0.1886	0.4244	0.1253	0.0342	0.3607	0.0165	0.2808	0.3238	0.3747	0.3446	0.4953	0.3714	0.2311	0.2372	0.2603	0.1547	0.344	0.0923	0.3479	0.2734	0.2362	0.0503	0.4523	0.4898	0.105	0.0206	0.141	0.1395	0.4367
CG11309	0.4737	0.1747	0.3714	0.0138	0.4663	0.1677	0.0337	0.0756	0.4647	0.0525	0.2759	0.0609	0.3968	0.0403	0.1265	0.0873	0.1565	0.17	0.278	0.1056	0.1541	0.2225	0.5642	0.319	0.168	0.0025	0.0439	0.3702	0.0567	0.5055	0.2423	0.0234	0.0858	0.1185	0.091	0.3919	0.4406	0.4745	0.4976	0.2839	0.0838	0.589	0.0157	0.2583	0.2158	0.0257	0.0084	0.0125	0.1189
CG32809	0.287	0.4452	0.4357	0.0873	0.3026	0.4539	0.005	0.0276	0.5003	0.0282	0.197	0.1694	0.395	0.4192	0.5264	0.3703	0.0096	0.0451	0.2516	0.3407	0.2314	0.2512	0.0891	0.2218	0.0709	0.2852	0.052	0.1434	0.0137	0.4779	0.1538	0.0096	0.0375	0.4831	0.2712	0.2444	0.2795	0.1321	0.4643	0.4606	0.1211	0.4407	0.0009	0.2932	0.3358	0.191	0.0024	0.1527	0.2946
Tollo	0.5056	0.0457	0.4686	0.25	0.0448	0.0025	0.2503	0.5003	0.1501	0.4386	0.0095	0.4699	0.01	0.2868	0.0446	0.4507	0.1547	0.0803	0.3209	0.3052	0.2468	0.2175	0.28	0.3072	0.4741	0.3444	0.3245	0.0613	0.489	0.3724	0.4635	0.15	0.3099	0.0279	0.4871	0.3849	0.1782	0.2373	0.0683	0.3052	0.0479	0.1204	0.3192	0.1708	0.1604	0.3473	0.3416	0.431	0.4131
CG4294	0.4149	0.3708	0.3026	0.0389	0.2455	0.1989	0.0697	0.0367	0.3012	0.0187	0.4692	0.169	0.286	0.0994	0.3593	0.0274	0.301	0.3324	0.386	0.0956	0.4804	0.0271	0.3749	0.5558	0.2462	0.088	0.0653	0.3554	0.0308	0.1369	0.0405	0.0367	0.0059	0.4335	0.052	0.3123	0.1885	0.2281	0.0595	0.2568	0.2463	0.0658	0.0265	0.3172	0.4119	0.0403	0.0188	0.0501	0.508
RpL38	0.3421	0.2328	0.0498	0.0421	0.196	0.2392	0.3831	0.0155	0.4064	0.0795	0.1185	0.0688	0.102	0.1561	0.2736	0.1124	0.2156	0.1938	0.2896	0.1084	0.3103	0.0096	0.2676	0.1763	0.0982	0.0861	0.1116	0.2208	0.0487	0.5001	0.2416	0.3226	0.043	0.2724	0.0244	0.198	0.2135	0.1501	0.0251	0.3484	0.3223	0.3133	0.0674	0.317	0.282	0.1444	0.1958	0.0699	0.0948
bai	0.1728	0.0179	0.1741	0.2788	0.2445	0.1529	0.3896	0.1441	0.1899	0.2833	0.2125	0.2983	0.3993	0.0251	0.0769	0.115	0.0346	0.2349	0.0045	0.1052	0.3875	0.2633	0.1599	0.0215	0.0681	0.1185	0.1574	0.0623	0.1916	0.3668	0.2443	0.127	0.4806	0.0349	0.5039	0.0681	0.2037	0.254	0.1377	0.4972	0.0128	0.1124	0.3923	0.5431	0.004	0.0258	0.1025	0.4487	0.4169
Ho	0.0514	0.0696	0.3699	0.4661	0.1353	0.3479	0.3623	0.3291	0.303	0.2564	0.4692	0.076	0.4607	0.1778	0.4318	0.2359	0.4437	0.0724	0.1845	0.2226	0.1822	0.1928	0.2364	0.3489	0.3926	0.1796	0.2272	0.4886	0.4947	0.1085	0.216	0.2439	0.1182	0.462	0.1062	0.4486	0.0866	0.0719	0.1653	0.3376	0.4667	0.2546	0.4652	0.4216	0.4049	0.2942	0.2139	0.0688	0.1627
hfw	0.0108	0.1988	0.0843	0.3565	0.4816	0.354	0.3211	0.4391	0.3623	0.3755	0.4684	0.1288	0.5033	0.4604	0.1752	0.4452	0.299	0.0909	0.446	0.3038	0.3593	0.26	0.1972	0.4739	0.2705	0.251	0.2901	0.47	0.4687	0.2764	0.1387	0.4713	0.483	0.2189	0.3677	0.039	0.4847	0.3017	0.3943	0.0438	0.2365	0.2798	0.3809	0.1656	0.3738	0.4523	0.3364	0.1254	0.2665
Dcr-2	0.2256	0.196	0.319	0.2545	0.4297	0.4564	0.0846	0.3741	0.1622	0.49	0.2174	0.3853	0.3255	0.0183	0.1928	0.055	0.3639	0.1955	0.0181	0.06	0.1007	0.414	0.0511	0.0307	0.1672	0.0772	0.4155	0.1381	0.1783	0.452	0.4826	0.4578	0.3829	0.2541	0.2306	0.0423	0.4013	0.0223	0.311	0.4846	0.3376	0.029	0.4843	0.4605	0.0632	0.0806	0.3772	0.3101	0.3969
CG1662	0.3158	0.2553	0.1458	0.1954	0.1028	0.1564	0.4037	0.0435	0.3284	0.1223	0.2423	0.1715	0.2606	0.1737	0.3871	0.0465	0.1355	0.0897	0.3981	0.0703	0.3982	0.0155	0.3821	0.3315	0.3646	0.2801	0.2376	0.3504	0.1257	0.1632	0.1479	0.3162	0.0525	0.2143	0.0545	0.1601	0.4583	0.1435	0.0233	0.1247	0.2483	0.1471	0.0756	0.338	0.4162	0.1177	0.2804	0.2626	0.4857
Gr39a	0.2824	0.0962	0.0658	0.243	0.2816	0.0201	0.1108	0.0158	0.2536	0.0607	0.2745	0.3543	0.0906	0.2212	0.0262	0.3257	0.3047	0.4142	0.0336	0.3197	0.0193	0.0164	0.0131	0.0528	0.054	0.3497	0.1288	0.0007	0.0238	0.2698	0.0642	0.2619	0.0075	0.0364	0.0848	0.4262	0.3647	0.4709	0.0672	0.0907	0.1544	0.3027	0.1734	0.1144	0.0116	0.3155	0.2619	0.2587	0.3496
CalpA	0.4424	0.2065	0.0058	0.2224	0.4791	0.401	0.0714	0.0152	0.1101	0.0153	0.4575	0.1684	0.2388	0.4062	0.082	0.4718	0.4322	0.371	0.119	0.3795	0.1043	0.0136	0.0225	0.0497	0.0707	0.4545	0.0191	0.0647	0.0134	0.2505	0.0312	0.1345	0.0205	0.1372	0.0221	0.3557	0.3645	0.3965	0.1254	0.0952	0.2603	0.4087	0.0958	0.1232	0.071	0.4775	0.1612	0.2373	0.1172
jar	0.0186	0.3305	0.2575	0.1903	0.4753	0.363	0.4668	0.3887	0.2734	0.0411	0.3423	0.0338	0.425	0.0463	0.3913	0.0336	0.2954	0.3467	0.0963	0.0185	0.4936	0.1594	0.3726	0.1462	0.2212	0.2071	0.0309	0.265	0.3426	0.0948	0.0122	0.0653	0.114	0.3795	0.1004	0	0.176	0.1207	0.3619	0.0599	0.2589	0.0157	0.2177	0.397	0.1573	0.0196	0.0875	0.4868	0.3906
CG5961	0.4153	0.3629	0.188	0.2533	0.4064	0.4391	0.0756	0.4375	0.1919	0.1086	0.0453	0.208	0.4171	0.4484	0.3093	0.445	0.0004	0.0729	0.3674	0.3683	0.19	0.3144	0.1201	0.229	0.4117	0.4532	0.1748	0.4625	0.2208	0.3051	0.1333	0.0235	0.3014	0.2404	0.3356	0.4838	0.0935	0.1081	0.1379	0.4331	0.0703	0.3174	0.2265	0.3431	0.3006	0.2186	0.0492	0.4169	0.4313
INPP5E	0.1743	0.2634	0.4636	0.1162	0.4834	0.1552	0.0395	0.2074	0.3711	0.0082	0.0331	0.0207	0.3386	0.173	0.1582	0.1337	0.0064	0.1682	0.3426	0.1895	0.4412	0.4127	0.1663	0.4851	0.436	0.196	0.0254	0.3376	0.0715	0.2708	0.0564	0.0004	0.1445	0.1084	0.2722	0.2552	0.1417	0.2473	0.2438	0.4051	0.0178	0.4172	0.0198	0.2654	0.1929	0.0263	0.0091	0.3507	0.2201
Zfrp8	0.3824	0.105	0.0586	0.1722	0.3355	0.147	0.4356	0.4665	0.0924	0.3617	0.098	0.1689	0.2438	0.0859	0.0016	0.1045	0.043	0.2751	0.1216	0.2245	0.0433	0.1834	0.2059	0.2294	0.3553	0.0983	0.3743	0.0889	0.4737	0.4168	0.4111	0.0968	0.4821	0.0033	0.4398	0.5053	0.3604	0.2331	0.1196	0.1074	0.0017	0.5262	0.1007	0.0074	0.021	0.0317	0.0859	0.3138	0.4932
Rel	0.4799	0.3445	0.1678	0.2782	0.46	0.2874	0.1184	0.0941	0.3393	0.0341	0.2586	0.2742	0.46	0.2465	0.1812	0.3648	0.1672	0.1617	0.2268	0.342	0.0122	0.1519	0.0306	0.239	0.239	0.3293	0.0361	0.1031	0.0816	0.1115	0.0018	0.0528	0.0408	0.1794	0.2159	0.5599	0.1017	0.4681	0.2418	0.1185	0.3422	0.2719	0.1037	0.3761	0.1944	0.4832	0.0756	0.3354	0.4931
Pdxk	0.4428	0.082	0.1572	0.2138	0.43	0.1482	0.4104	0.2887	0.2283	0.3273	0.1293	0.276	0.2116	0.0603	0.0028	0.0533	0.1398	0.2489	0.1766	0.1525	0.0321	0.3181	0.1521	0.4014	0.4818	0.0584	0.3642	0.1056	0.4047	0.4737	0.4031	0.1082	0.4039	0.0066	0.3918	0.4127	0.3501	0.336	0.2539	0.1116	0.0101	0.366	0.058	0.0061	0.0443	0.032	0.096	0.1636	0.4775
be	0.1375	0.369	0.4937	0.0202	0.0628	0.4391	0.1886	0.094	0.1474	0.0519	0.3566	0.0002	0.3155	0.1539	0.2686	0.066	0.1472	0.3729	0.4777	0.1543	0.1651	0.2735	0.2003	0.4221	0.3279	0.1215	0.114	0.4757	0.0496	0.4713	0.2364	0.0576	0.1147	0.2246	0.2079	0.2528	0.432	0.3214	0.4555	0.4568	0.1302	0.3319	0.0096	0.1663	0.3274	0.0335	0.0391	0.2858	0.1562
Lac	0.3949	0.3891	0.1627	0.0122	0.4198	0.2774	0.0158	0.0087	0.4353	0.0035	0.4526	0.1052	0.1955	0.1104	0.5074	0.0962	0.2021	0.1639	0.4919	0.1173	0.3668	0.0199	0.136	0.2869	0.0787	0.0424	0.0052	0.2341	0.0063	0.2433	0.0257	0.012	0.0006	0.4565	0.019	0.3487	0.2735	0.2821	0.0899	0.3319	0.2245	0.1867	0.0171	0.41	0.4504	0.058	0.0025	0.0206	0.2228
dpr6	0.4784	0.1248	0.3088	0.2474	0.1218	0.0032	0.5194	0.3212	0.2156	0.2304	0.0762	0.4526	0.0334	0.4589	0.0475	0.3008	0.2074	0.23	0.431	0.4211	0.078	0.0531	0.1819	0.2782	0.4799	0.4029	0.3417	0.0695	0.3007	0.2048	0.1316	0.4836	0.0709	0.0189	0.2094	0.2345	0.4089	0.1103	0.0172	0.0609	0.0827	0.0291	0.4995	0.1682	0.1886	0.4355	0.3992	0.4562	0.2854
CG10462	0.206	0.1096	0.2014	0.0955	0.3507	0.3184	0.3379	0.3689	0.0747	0.0642	0.0882	0.0749	0.373	0.035	0.0403	0.0063	0.0351	0.2656	0.0404	0.0752	0.2635	0.4988	0.4071	0.0758	0.276	0.101	0.0983	0.1559	0.3127	0.2024	0.117	0.0104	0.1599	0.0542	0.2908	0.1547	0.1086	0.4995	0.31	0.4653	0.0136	0.098	0.0679	0.0886	0.0279	0.0001	0.0105	0.3178	0.4345
Sugb	0.5049	0.4777	0.4809	0.3448	0.4299	0.0421	0.3751	0.3697	0.2221	0.1695	0.3283	0.4039	0.1562	0.3907	0.2064	0.2958	0.5093	0.4198	0.1884	0.3588	0.0267	0.1917	0.3018	0.1018	0.2679	0.4578	0.2152	0.2722	0.5099	0.0728	0.0568	0.3129	0.0928	0.1599	0.2789	0.1641	0.1149	0.1057	0.1647	0.0485	0.272	0.0098	0.3195	0.1393	0.5015	0.3137	0.2658	0.4706	0.1618
HPS4	0.1756	0.3176	0.3189	0.2704	0.3102	0.42	0.1899	0.1983	0.232	0.1561	0.4634	0.2018	0.5244	0.0288	0.2233	0.0032	0.3007	0.1633	0.143	0.0074	0.1901	0.1164	0.2138	0.2985	0.3377	0.1354	0.2147	0.2296	0.4356	0.122	0.1605	0.2165	0.149	0.3342	0.0893	0.0295	0.3024	0.0416	0.1113	0.1852	0.3287	0.0264	0.1478	0.211	0.1615	0.0464	0.2173	0.2701	0.3738
Trpm	0.4725	0.1413	0.318	0.1558	0.2632	0.2081	0.0241	0.1635	0.3822	0.0037	0.0482	0.1701	0.3853	0.1643	0.2594	0.1419	0.0151	0.0219	0.2744	0.1759	0.2655	0.2703	0.178	0.47	0.311	0.1474	0.0048	0.4592	0.0689	0.1569	0.0202	0.0003	0.0476	0.1982	0.1203	0.3475	0.053	0.437	0.4034	0.3352	0.0377	0.3106	0.0427	0.3965	0.3143	0.049	0.0033	0.1704	0.3215
Ptp10D	0.143	0.1739	0.4834	0.1184	0.423	0.4773	0.249	0.386	0.1369	0.0842	0.5051	0.156	0.3459	0.0064	0.2227	0.0012	0.3705	0.3874	0.0415	0.0074	0.3409	0.1796	0.2455	0.0773	0.2307	0.0515	0.0781	0.2164	0.4747	0.1364	0.0741	0.0995	0.0882	0.277	0.0721	0.006	0.2202	0.0262	0.2377	0.1987	0.1889	0.0031	0.201	0.3865	0.0675	0.0069	0.0707	0.2427	0.4009
Gapvd1	0.4651	0.515	0.1862	0.0227	0.4372	0.4629	0.0212	0.0349	0.3845	0.0006	0.3542	0.0511	0.1763	0.2556	0.3672	0.1556	0.0773	0.1037	0.4656	0.2437	0.2313	0.0698	0.0623	0.3434	0.0934	0.1035	0.0015	0.177	0.0116	0.3673	0.0268	0.0085	0.0072	0.4604	0.0459	0.334	0.2969	0.485	0.287	0.3358	0.2136	0.2403	0.0175	0.3008	0.3703	0.0716	0.0019	0.0927	0.0943
goe	0.2182	0.2791	0.1098	0.4712	0.4081	0.3171	0.225	0.2593	0.467	0.0532	0.2873	0.2518	0.4877	0.443	0.1851	0.3392	0.4896	0.4382	0.4121	0.2754	0.0443	0.0814	0.0502	0.4847	0.4183	0.2294	0.1172	0.2768	0.1561	0.0133	0.0028	0.1279	0.1022	0.1351	0.1999	0.1577	0.0521	0.3443	0.2012	0.0019	0.3095	0.1654	0.2772	0.3682	0.3064	0.3653	0.2625	0.3168	0.3088
atl	0.4528	0.2623	0.3631	0.2463	0.2358	0.4959	0.3043	0.1593	0.1816	0.3507	0.48	0.3666	0.3826	0.0484	0.0587	0.0151	0.4114	0.3702	0.2524	0.0635	0.0474	0.3387	0.1179	0.4029	0.4804	0.0837	0.4677	0.2328	0.3985	0.361	0.4479	0.2895	0.2482	0.1676	0.1932	0.4333	0.4382	0.302	0.2736	0.334	0.2007	0.373	0.07	0.042	0.1446	0.046	0.2278	0.1545	0.3157
egl	0.476	0.0264	0.2393	0.144	0.2605	0.015	0.1695	0.3799	0.4296	0.2026	0.0864	0.2178	0.2928	0.0733	0.0104	0.1811	0.0479	0.0869	0.0608	0.1814	0.1123	0.2719	0.2113	0.3609	0.4407	0.03	0.1565	0.0952	0.3908	0.4083	0.4702	0.0503	0.3539	0.0018	0.294	0.4981	0.3349	0.3521	0.1355	0.1042	0.0065	0.3096	0.1385	0.1152	0.0419	0.0727	0.0474	0.1096	0.2531
eEF5	0.3547	0.0001	0.3094	0.4857	0.1073	0.1847	0.3418	0.1869	0.3008	0.2672	0.2353	0.363	0.2749	0.0179	0.0933	0.0563	0.2112	0.1867	0.0018	0.0334	0.4412	0.3929	0.0476	0.0532	0.0502	0.2004	0.2071	0.0626	0.1204	0.0603	0.1903	0.1556	0.4167	0.1183	0.3619	0.1074	0.0231	0.108	0.3626	0.3004	0.0659	0.1217	0.2739	0.3925	0.0066	0.0393	0.1993	0.3955	0.1637
nonC	0.2289	0.0471	0.453	0.0989	0.3971	0.2486	0.3971	0.3305	0.2555	0.0358	0.2452	0.1471	0.4838	0.0028	0.0762	0.0034	0.1501	0.28	0.0168	0.0086	0.3141	0.2879	0.2333	0.0794	0.303	0.0305	0.0388	0.1283	0.4019	0.141	0.0552	0.0223	0.0892	0.1137	0.0875	0.034	0.1153	0.1469	0.4539	0.3424	0.085	0.0542	0.1149	0.2891	0.0194	0	0.0173	0.1382	0.4969
CG16935	0.3469	0.3038	0.3806	0.1479	0.1124	0.4416	0.3432	0.0985	0.4315	0.4793	0.4216	0.1902	0.412	0.4597	0.2557	0.3162	0.4296	0.4004	0.1592	0.4364	0.03	0.4765	0.5112	0.116	0.0784	0.2148	0.3787	0.396	0.1491	0.0638	0.1135	0.4854	0.4725	0.2254	0.4846	0.1317	0.0818	0.1381	0.4758	0.0266	0.267	0.0937	0.0669	0.0924	0.4236	0.3641	0.3662	0.177	0.145
lncRNA:CR43650	0.1999	0.1525	0.0385	0.2897	0.3174	0.0208	0.3656	0.0338	0.2087	0.3151	0.0136	0.3801	0.0391	0.4503	0.0486	0.3943	0.0402	0.2417	0.1324	0.4027	0.2931	0.0055	0.2874	0.1054	0.0644	0.3701	0.3979	0.0453	0.183	0.4703	0.3982	0.2735	0.0672	0.0352	0.0238	0.4913	0.2414	0.0973	0.0002	0.2642	0.0454	0.3352	0.3895	0.1386	0.0375	0.321	0.4021	0.1262	0.3773
gammaSnap1	0.0205	0.436	0.3454	0.3732	0.4789	0.1187	0.0541	0.3165	0.4511	0.234	0.3756	0.1909	0.3532	0.2872	0.3792	0.4162	0.2289	0.0346	0.3748	0.2309	0.0385	0.3825	0.2218	0.4963	0.2373	0.4316	0.3751	0.1256	0.2084	0.2747	0.2948	0.205	0.1589	0.319	0.4646	0.0977	0.1267	0.3406	0.37	0.4796	0.4487	0.4666	0.3358	0.4929	0.2807	0.4614	0.1901	0.2451	0.1951
mRpL14	0.2207	0.0029	0.2036	0.4069	0.1204	0.0668	0.1473	0.1366	0.3016	0.4594	0.1785	0.4485	0.1407	0.0087	0.0125	0.0951	0.2815	0.3703	0.0002	0.0399	0.1347	0.2062	0.0057	0.0268	0.038	0.1372	0.376	0.001	0.0632	0.2678	0.4333	0.2903	0.3347	0.0162	0.4616	0.0857	0.176	0.1523	0.1872	0.4533	0.0514	0.1615	0.3698	0.2617	0.0005	0.0619	0.3394	0.4717	0.2554
CG3534	0.3312	0.4233	0.4172	0.4245	0.4527	0.0956	0.1495	0.3121	0.1973	0.3424	0.2803	0.3176	0.3664	0.2532	0.3	0.1463	0.2123	0.26	0.1647	0.1266	0.1624	0.1849	0.3912	0.1015	0.1162	0.4158	0.397	0.4665	0.2478	0.0191	0.1026	0.5123	0.2385	0.1783	0.2645	0.0775	0.1326	0.034	0.129	0.0205	0.208	0.0096	0.2365	0.3026	0.3482	0.3002	0.5205	0.3913	0.0821
CG2059	0.2174	0.0161	0.2114	0.48	0.244	0.1378	0.0889	0.1957	0.2278	0.4427	0.335	0.4787	0.2294	0.0071	0.0233	0.0582	0.4017	0.464	0.0014	0.0329	0.0824	0.2967	0.0057	0.0238	0.051	0.101	0.4266	0.0042	0.0757	0.3027	0.5003	0.3747	0.3889	0.0474	0.3773	0.07	0.2788	0.1049	0.3256	0.4413	0.121	0.1062	0.415	0.2392	0.0011	0.0592	0.3692	0.4337	0.2567
Tspo	0.2894	0.1542	0.2952	0.4512	0.2191	0.0614	0.0088	0.4154	0.362	0.2467	0.0126	0.4392	0.1287	0.4993	0.1205	0.3971	0.0335	0.0171	0.5086	0.3488	0.5075	0.1775	0.3923	0.2727	0.3417	0.3689	0.2693	0.3579	0.2741	0.4759	0.4695	0.0792	0.4971	0.0923	0.3501	0.168	0.2221	0.0564	0.0654	0.1852	0.0698	0.1353	0.1924	0.1804	0.3137	0.3186	0.1471	0.3708	0.3514
SREBP	0.4915	0.4355	0.3594	0.2326	0.4395	0.3752	0.1134	0.167	0.485	0.0329	0.162	0.2476	0.5078	0.2663	0.2883	0.3514	0.021	0.0943	0.3114	0.3003	0.0349	0.2384	0.0583	0.3909	0.266	0.3772	0.0469	0.1665	0.1036	0.1757	0.009	0.024	0.0717	0.3069	0.3763	0.5323	0.0802	0.2825	0.4617	0.2227	0.4448	0.27	0.0962	0.531	0.2918	0.3839	0.0435	0.3613	0.5031
Not1	0.1369	0.1483	0.3785	0.2409	0.5167	0.2516	0.2147	0.2489	0.2858	0.1234	0.3456	0.1559	0.4075	0.0045	0.1093	0.0007	0.4092	0.3487	0.0313	0.0006	0.1433	0.1947	0.1675	0.1899	0.2994	0.0711	0.1323	0.0914	0.4585	0.1366	0.13	0.1166	0.163	0.1797	0.0973	0.0077	0.2315	0.0535	0.2782	0.2685	0.1665	0.0319	0.1325	0.1751	0.0466	0.0139	0.1276	0.2174	0.4854
CG8229	0.4984	0.4558	0.2846	0.286	0.2408	0.0514	0.3422	0.3788	0.0702	0.2119	0.4365	0.4861	0.1812	0.4771	0.3013	0.2916	0.3014	0.4114	0.2419	0.4777	0.0544	0.3169	0.2718	0.0714	0.2511	0.4042	0.298	0.2545	0.4396	0.1138	0.0944	0.2519	0.1385	0.234	0.4483	0.2576	0.1149	0.2661	0.2817	0.1172	0.4369	0.0147	0.4613	0.34	0.4557	0.2677	0.1995	0.4397	0.128
Ank	0.4197	0.1403	0.431	0.083	0.4848	0.384	0.4048	0.0959	0.4337	0.1176	0.4386	0.2519	0.4385	0.0171	0.0993	0.02	0.3462	0.3359	0.1649	0.0575	0.0993	0.1707	0.1816	0.5421	0.2961	0.0104	0.1404	0.2837	0.2121	0.3407	0.3468	0.113	0.1022	0.1554	0.087	0.3625	0.4128	0.201	0.23	0.3735	0.1615	0.3568	0.0629	0.1179	0.1731	0.035	0.0641	0.0187	0.3737
CG5543	0.3468	0.0345	0.1037	0.3941	0.3053	0.0037	0.3367	0.357	0.2732	0.4555	0.1275	0.346	0.1321	0.0345	0.0003	0.1324	0.1805	0.3192	0.0187	0.1505	0.0133	0.139	0.0368	0.183	0.2229	0.0827	0.4473	0.0053	0.2395	0.4163	0.2925	0.2383	0.3218	0.0007	0.5098	0.3512	0.4136	0.4336	0.1261	0.1032	0.009	0.4093	0.294	0.0222	0.0039	0.0694	0.2379	0.3394	0.5074
scf	0.3341	0.2882	0.3079	0.4479	0.2204	0.3	0.1992	0.2334	0.4715	0.3782	0.1768	0.337	0.1771	0.1663	0.2372	0.3325	0.2521	0.4117	0.1031	0.1645	0.1882	0.2159	0.3236	0.1055	0.1983	0.3374	0.2291	0.4482	0.1902	0.2003	0.1617	0.4292	0.2757	0.2214	0.1794	0.0471	0.3305	0.0049	0.1807	0.0963	0.2173	0.0264	0.1524	0.0042	0.3774	0.3608	0.4927	0.4067	0.3353
cwo	0.3008	0.2682	0.0669	0.2126	0.4116	0.1136	0.0867	0.1776	0.1786	0.0537	0.2573	0.4448	0.0617	0.347	0.0221	0.4038	0.4778	0.2119	0.2833	0.4142	0.0067	0.0363	0.037	0.3592	0.1255	0.4845	0.0547	0.0204	0.084	0.2958	0.0551	0.261	0.0271	0.0506	0.0949	0.4175	0.3511	0.255	0.1019	0.1152	0.1929	0.2269	0.4235	0.0077	0.0573	0.4067	0.1983	0.2259	0.2689
Agpat1	0.3503	0.0272	0.387	0.0914	0.1715	0.1088	0.0052	0.3127	0.4061	0.0856	0.1163	0.2752	0.473	0.0833	0.0981	0.1902	0.0239	0.0057	0.0794	0.1974	0.4064	0.5014	0.3899	0.3607	0.3226	0.025	0.0425	0.2782	0.2319	0.4471	0.2127	0.0156	0.1491	0.0633	0.2106	0.4681	0.1979	0.4929	0.2398	0.2524	0.0209	0.4998	0.1401	0.4652	0.1315	0.0659	0.0076	0.045	0.2359
mRpS5	0.4168	0.4787	0.4018	0.1694	0.2597	0.2919	0.1322	0.4675	0.1963	0.281	0.4154	0.2198	0.1839	0.4574	0.2659	0.148	0.1649	0.1924	0.3595	0.2463	0.396	0.4213	0.1693	0.3193	0.2396	0.2588	0.1799	0.2805	0.3386	0.06	0.5191	0.3985	0.4155	0.3888	0.423	0.5023	0.1821	0.3777	0.2166	0.2719	0.2884	0.2993	0.4391	0.1056	0.3475	0.4626	0.2762	0.3343	0.0134
Dera	0.4571	0.0107	0.2748	0.4284	0.0281	0.223	0.4355	0.0948	0.4549	0.4248	0.2182	0.2297	0.349	0.1976	0.2579	0.482	0.1217	0.0421	0.0237	0.3617	0.2361	0.2626	0.2006	0.057	0.1434	0.3071	0.2377	0.167	0.1353	0.2673	0.261	0.2523	0.4701	0.1944	0.4642	0.2547	0.0926	0.2274	0.1886	0.4307	0.1477	0.1394	0.1726	0.2396	0.0981	0.2962	0.2724	0.4442	0.2836
Wdr62	0.1798	0.2849	0.117	0.1763	0.3147	0.4424	0.0074	0.0092	0.1791	0.0128	0.2329	0.3584	0.5009	0.2528	0.4915	0.1346	0.2479	0.035	0.4251	0.1846	0.2235	0.0591	0.1753	0.1745	0.0629	0.1372	0.0135	0.2779	0.0217	0.1563	0.0487	0.0128	0.0083	0.5043	0.0228	0.4147	0.1132	0.4222	0.2157	0.33	0.2624	0.4945	0.0192	0.4322	0.3608	0.1392	0.0159	0.0461	0.3372
CG34347	0.3794	0.0997	0.0861	0.1947	0.2182	0.0074	0.2195	0.0676	0.4053	0.0669	0.1484	0.3478	0.0309	0.3429	0.0218	0.4315	0.2562	0.4188	0.168	0.4989	0.0345	0.0064	0.0422	0.3444	0.1441	0.4184	0.1374	0.0107	0.0664	0.2045	0.0607	0.3368	0.0092	0.0139	0.0582	0.3827	0.3736	0.1859	0.0081	0.0516	0.0825	0.2266	0.2782	0.0916	0.0443	0.5373	0.277	0.2782	0.4478
Vha100-2	0.3927	0.1461	0.4671	0.3992	0.2116	0.154	0.1279	0.4589	0.2398	0.1906	0.3609	0.2861	0.2831	0.1234	0.1327	0.2611	0.1956	0.4097	0.281	0.1871	0.0151	0.4138	0.0135	0.3875	0.4579	0.1106	0.3278	0.1082	0.2052	0.2639	0.1106	0.2592	0.2864	0.1546	0.3273	0.4741	0.2096	0.2359	0.4917	0.1282	0.3696	0.2177	0.466	0.2758	0.2206	0.3811	0.3016	0.2002	0.3849
CG12744	0.2189	0.1793	0.2723	0.4145	0.4788	0.0212	0.2793	0.4921	0.385	0.3359	0.1337	0.2651	0.0672	0.1458	0.0062	0.2134	0.4001	0.3455	0.2993	0.1826	0.0009	0.1774	0.0787	0.4982	0.3192	0.2483	0.3468	0.0278	0.3453	0.3623	0.2027	0.4047	0.1855	0.0037	0.3837	0.4476	0.4077	0.2864	0.128	0.1421	0.0468	0.2109	0.249	0.0209	0.0564	0.2018	0.4974	0.4921	0.4264
CG1888	0.1936	0.163	0.4558	0.1071	0.3876	0.4689	0.2857	0.277	0.117	0.0234	0.196	0.0965	0.5032	0.026	0.1501	0.0065	0.1412	0.3615	0.0525	0.0299	0.4707	0.225	0.5156	0.0894	0.2904	0.1036	0.0438	0.2618	0.256	0.0634	0.0215	0.0103	0.0574	0.2016	0.1162	0.0495	0.0551	0.2221	0.3934	0.1849	0.1144	0.0278	0.0806	0.228	0.0709	0.0021	0.0129	0.2824	0.3676
CG12016	0.4754	0.2846	0.0662	0.1123	0.2843	0.32	0.2903	0.1559	0.2857	0.0112	0.2623	0.3647	0.1187	0.0772	0.2433	0.0676	0.4627	0.2833	0.2309	0.0513	0.1604	0.0101	0.3679	0.3711	0.3061	0.0852	0.0071	0.2952	0.2073	0.1159	0.0202	0.128	0.004	0.2612	0.0032	0.0799	0.2219	0.0205	0.0404	0.0944	0.422	0.0168	0.2985	0.089	0.4513	0.1132	0.0741	0.06	0.3433
CG5902	0.1745	0.359	0.4136	0.382	0.4587	0.3927	0.0251	0.3697	0.2561	0.4033	0.1974	0.444	0.4699	0.0916	0.4052	0.1088	0.0705	0.0458	0.101	0.0543	0.2532	0.282	0.0802	0.1313	0.1014	0.3526	0.446	0.1763	0.1363	0.1976	0.407	0.2883	0.4617	0.4347	0.2369	0.0294	0.4644	0.0117	0.1474	0.1693	0.2901	0.0375	0.3201	0.5037	0.188	0.2181	0.3116	0.4272	0.1867
CG10863	0.2972	0.1661	0.267	0.0465	0.3941	0.2703	0.0996	0.0298	0.2946	0.0751	0.3992	0.2253	0.4095	0.0476	0.1685	0.0918	0.2578	0.163	0.3964	0.0966	0.1654	0.1443	0.3455	0.217	0.0755	0.0063	0.0722	0.4449	0.0667	0.52	0.344	0.0705	0.0697	0.1644	0.0559	0.452	0.4792	0.3656	0.2978	0.2607	0.1482	0.3287	0.0291	0.2627	0.3426	0.0662	0.0323	0.0042	0.1636
Maf1	0.202	0.4449	0.3587	0.4244	0.2078	0.3055	0.1763	0.1426	0.2572	0.2928	0.1657	0.4099	0.2135	0.334	0.2683	0.2806	0.4793	0.3629	0.2781	0.5679	0.4355	0.42	0.324	0.2863	0.3659	0.2997	0.3571	0.4462	0.1821	0.1525	0.3795	0.1898	0.3308	0.4985	0.4099	0.117	0.1263	0.228	0.3389	0.4575	0.4742	0.3517	0.0737	0.0472	0.475	0.4155	0.3556	0.4251	0.1125
CG5323	0.3433	0.0018	0.3763	0.4187	0.0342	0.2052	0.2939	0.2656	0.2985	0.4249	0.4583	0.2224	0.4485	0.0193	0.1351	0.2164	0.4618	0.1512	0.023	0.1139	0.2404	0.3865	0.0026	0.1692	0.3252	0.033	0.3226	0.0984	0.1151	0.4577	0.4097	0.4585	0.5204	0.0951	0.2739	0.2703	0.4402	0.0843	0.4292	0.2439	0.1712	0.2563	0.2814	0.4177	0.0726	0.1885	0.3445	0.1368	0.4892
Adgf-A	0.3799	0.1058	0.1988	0.1942	0.4919	0.032	0.4929	0.3404	0.3277	0.3886	0.1415	0.1493	0.2262	0.0692	0.0053	0.1219	0.1159	0.3065	0.224	0.1934	0.0076	0.2476	0.1789	0.4986	0.4531	0.0477	0.3486	0.0777	0.4306	0.2685	0.3025	0.1561	0.4781	0.0007	0.4364	0.473	0.4292	0.2747	0.152	0.0573	0.0037	0.3194	0.0867	0.0247	0.0497	0.0524	0.1361	0.2052	0.2518
babo	0.4473	0.0526	0.323	0.0374	0.4207	0.5003	0.1888	0.345	0.2325	0.04	0.3254	0.2705	0.2995	0.0138	0.149	0.0104	0.0721	0.0828	0.0274	0.0832	0.4968	0.317	0.3596	0.0696	0.4844	0.0168	0.0339	0.3412	0.3186	0.264	0.1188	0.0189	0.0481	0.1539	0.1187	0.2121	0.1399	0.178	0.4488	0.4839	0.0502	0.0644	0.1502	0.4422	0.0909	0.0012	0.0034	0.0537	0.4925
CG3902	0.2585	0.4136	0.312	0.0826	0.3575	0.3814	0.1273	0.0216	0.3233	0.1906	0.4601	0.1855	0.4567	0.1902	0.2026	0.1809	0.3601	0.3115	0.2862	0.2449	0.0961	0.2275	0.5349	0.136	0.0341	0.0465	0.2283	0.4406	0.0444	0.2725	0.4137	0.1824	0.1615	0.2052	0.1459	0.2308	0.2727	0.3482	0.3599	0.1223	0.2142	0.1995	0.0093	0.1375	0.4837	0.1751	0.1162	0.0174	0.1139
CanA-14F	0.4054	0.4222	0.1677	0.1738	0.4473	0.0797	0.199	0.0527	0.1626	0.2001	0.3275	0.0863	0.4189	0.2002	0.2277	0.2373	0.3445	0.3958	0.2924	0.2152	0.0787	0.2926	0.4516	0.0872	0.0798	0.0875	0.1706	0.4081	0.0737	0.2609	0.4958	0.1863	0.2856	0.166	0.1573	0.4306	0.244	0.3193	0.4586	0.1944	0.1993	0.1411	0.0348	0.2851	0.4918	0.2144	0.1858	0.0974	0.0363
baz	0.1213	0.3101	0.0545	0.1685	0.251	0.2435	0.1977	0.0559	0.1238	0.0687	0.1819	0.3592	0.1336	0.1489	0.2485	0.1523	0.2812	0.199	0.4332	0.1375	0.2078	0.0062	0.4569	0.3954	0.0941	0.0696	0.0541	0.1984	0.1602	0.2361	0.1303	0.2425	0.0076	0.2275	0.0004	0.4016	0.3472	0.041	0.0127	0.2677	0.3199	0.2454	0.2455	0.1735	0.2643	0.2508	0.139	0.0073	0.3683
Pink1	0.4354	0.3177	0.2766	0.1834	0.2821	0.0852	0.1358	0.3869	0.4101	0.4799	0.0053	0.465	0.0234	0.2095	0.1605	0.2452	0.0768	0.121	0.3583	0.2441	0.4453	0.0933	0.3417	0.3	0.4525	0.1972	0.4224	0.2674	0.4352	0.4134	0.4834	0.2074	0.2025	0.1535	0.1336	0.1389	0.1611	0.026	0.0222	0.3435	0.1366	0.071	0.3745	0.1215	0.378	0.3729	0.4465	0.2322	0.3964
SCAP	0.4947	0.4525	0.1823	0.0242	0.4499	0.2152	0.0705	0.1182	0.5006	0	0.3838	0.155	0.0558	0.1641	0.2414	0.1109	0.2527	0.2045	0.3431	0.1846	0.1175	0.0302	0.1184	0.3444	0.2344	0.1162	0.0025	0.1578	0.0574	0.2181	0.0123	0.0373	0.0005	0.3054	0.0207	0.169	0.2281	0.1488	0.1172	0.1619	0.4446	0.0486	0.128	0.1486	0.4016	0.0722	0.0103	0.0799	0.2708
Ciao1	0.3109	0.4743	0.0329	0.0912	0.0748	0.201	0.3709	0.3278	0.001	0.4534	0.3563	0.2002	0.1749	0.2094	0.2528	0.1079	0.166	0.337	0.1784	0.4572	0.2507	0.3345	0.3901	0.0631	0.2292	0.2285	0.4622	0.4357	0.4377	0.3429	0.4502	0.3743	0.404	0.275	0.3239	0.2735	0.4013	0.4711	0.4627	0.2999	0.199	0.1357	0.4013	0.2671	0.1395	0.0646	0.1942	0.43	0.3512
Pex6	0.3731	0.0772	0.0532	0.3473	0.3094	0.0234	0.4929	0.3164	0.3757	0.271	0.033	0.4231	0.0188	0.3377	0.0039	0.4339	0.1094	0.1474	0.2671	0.4769	0.0864	0.0247	0.1498	0.4792	0.3652	0.3506	0.3052	0.0513	0.2739	0.3384	0.1703	0.3006	0.1184	0.01	0.1197	0.1913	0.3816	0.0966	0.027	0.0391	0.0416	0.1314	0.3299	0.004	0.0592	0.2914	0.3761	0.4639	0.4144
CAH2	0.0681	0.4551	0.3597	0.1735	0.3344	0.4323	0.1333	0.0137	0.3344	0.2484	0.4911	0.4682	0.4668	0.3286	0.2951	0.2224	0.4981	0.2543	0.2421	0.3672	0.2243	0.2085	0.4825	0.0861	0.0288	0.1246	0.3545	0.3024	0.0639	0.4001	0.3847	0.2489	0.1432	0.3716	0.1646	0.0934	0.4071	0.3685	0.2274	0.1608	0.3525	0.1596	0.0221	0.1374	0.3462	0.2861	0.1771	0.0192	0.3309
Uros1	0.0269	0.2238	0.2546	0.4366	0.4028	0.2777	0.0436	0.2177	0.0869	0.452	0.4875	0.2096	0.3905	0.0411	0.1075	0.0826	0.5172	0.1079	0.018	0.0578	0.0622	0.368	0.0807	0.023	0.0334	0.2248	0.4805	0.0278	0.1303	0.3623	0.4605	0.4728	0.3872	0.1514	0.4293	0.0102	0.4785	0.1451	0.3859	0.4068	0.2305	0.0465	0.468	0.2829	0.0162	0.0773	0.4482	0.3382	0.3619
pug	0.3613	0.3325	0.2483	0.2748	0.4393	0.1781	0.1195	0.1176	0.3096	0.1062	0.3021	0.3528	0.4334	0.1326	0.1426	0.1361	0.0959	0.0971	0.1282	0.1467	0.0023	0.2239	0.023	0.1296	0.2087	0.256	0.1122	0.0328	0.1143	0.3147	0.0794	0.1184	0.1102	0.1643	0.4227	0.3305	0.2482	0.2054	0.3454	0.2812	0.6624	0.563	0.1277	0.4584	0.1433	0.2894	0.1178	0.313	0.4716
CG7694	0.3034	0.0399	0.1341	0.477	0.338	0.1013	0.4102	0.5044	0.3955	0.3824	0.1726	0.3891	0.1209	0.1045	0.0018	0.185	0.2778	0.2454	0.1753	0.2522	0.0232	0.1689	0.0204	0.3918	0.4319	0.1108	0.3891	0.0528	0.3119	0.3797	0.1721	0.3374	0.3294	0.0048	0.4458	0.2952	0.4368	0.3865	0.1866	0.0574	0.0273	0.2675	0.269	0.0224	0.0474	0.1654	0.339	0.2304	0.3773
CG15012	0.4094	0.0295	0.431	0.1589	0.1917	0.5475	0.2007	0.4341	0.4078	0.083	0.3684	0.5003	0.3288	0.0374	0.3186	0.0702	0.0912	0.043	0.0426	0.1238	0.2269	0.3188	0.4018	0.0938	0.379	0.0742	0.0328	0.3714	0.4401	0.1812	0.0798	0.0519	0.0646	0.2956	0.121	0.1913	0.0805	0.1297	0.4	0.3515	0.1169	0.0808	0.4362	0.3059	0.1517	0.0281	0.0196	0.1312	0.3845
Strump	0.4189	0.0801	0.1324	0.4376	0.4274	0.2149	0.1102	0.2832	0.198	0.1907	0.451	0.3772	0.2357	0.0668	0.0227	0.1271	0.4706	0.3384	0.0253	0.1502	0.0137	0.2107	0.0037	0.089	0.1436	0.1486	0.2766	0.0154	0.095	0.4813	0.1855	0.4068	0.2619	0.0781	0.4973	0.3222	0.4653	0.258	0.3189	0.1936	0.1744	0.4088	0.4897	0.0577	0.0151	0.1547	0.4694	0.4182	0.2473
Plod	0.2636	0.0785	0.2259	0.1829	0.3437	0.0721	0.2313	0.2816	0.4663	0.3594	0.1587	0.3498	0.2966	0.1429	0.0222	0.2252	0.1011	0.0837	0.3105	0.3037	0.0588	0.2664	0.2232	0.388	0.2545	0.044	0.3157	0.1887	0.3466	0.2216	0.2754	0.1445	0.4317	0.0109	0.3888	0.2201	0.468	0.2326	0.1791	0.023	0.0172	0.1858	0.1179	0.0692	0.1331	0.1426	0.1095	0.0787	0.2371
Sh3beta	0.0342	0.1706	0.4844	0.42	0.3649	0.2422	0.0941	0.2133	0.2159	0.232	0.4033	0.2485	0.3944	0.021	0.3111	0.0225	0.4303	0.2802	0.0435	0.0026	0.4871	0.3982	0.2526	0.0811	0.0293	0.2825	0.1533	0.1039	0.1964	0.0826	0.0889	0.2378	0.3878	0.3495	0.2708	0.0001	0.1712	0.0642	0.4462	0.0844	0.3413	0.0333	0.3177	0.4297	0.0424	0.0318	0.2967	0.333	0.319
mino	0.387	0.0218	0.4343	0.473	0.0529	0.0062	0.1121	0.4416	0.3007	0.1656	0.0075	0.336	0.0863	0.1663	0.0654	0.2973	0.0279	0.0243	0.1068	0.2241	0.4439	0.2684	0.3936	0.3794	0.3967	0.1988	0.098	0.0887	0.4606	0.3049	0.1907	0.0293	0.4359	0.0345	0.3726	0.395	0.0884	0.3275	0.0673	0.4202	0.02	0.3948	0.2715	0.364	0.084	0.1539	0.0939	0.3827	0.3366
aos	0.1835	0.3039	0.2172	0.261	0.4564	0.2399	0.1261	0.1523	0.3497	0.2068	0.2471	0.2829	0.2955	0.1844	0.2563	0.4013	0.3827	0.297	0.1322	0.3877	0.052	0.1828	0.1288	0.1519	0.2835	0.1422	0.4174	0.1754	0.1441	0.0469	0.1232	0.2504	0.2093	0.1534	0.3823	0.2115	0.0581	0.3385	0.2255	0.0963	0.2575	0.4161	0.2664	0.3387	0.1432	0.3236	0.4367	0.4742	0.1502
CG1234	0.4711	0.0972	0.0832	0.3011	0.3744	0.3957	0.0388	0.0685	0.1079	0.2264	0.4526	0.1103	0.3876	0.1987	0.2157	0.3133	0.423	0.4774	0.031	0.3196	0.4823	0.2442	0.0142	0.0077	0.0253	0.4688	0.2759	0.1329	0.0152	0.2304	0.4566	0.3552	0.3268	0.3498	0.3066	0.2459	0.1978	0.1254	0.4794	0.4121	0.441	0.0891	0.1265	0.3759	0.0625	0.3233	0.3807	0.3844	0.0289
qin	0.1872	0.0256	0.3201	0.296	0.3012	0.2182	0.1317	0.2394	0.2058	0.3544	0.4785	0.3838	0.4529	0.0009	0.0982	0.0115	0.3608	0.483	0.0034	0.0077	0.2202	0.492	0.0307	0.0328	0.0799	0.0587	0.2138	0.0486	0.1407	0.2796	0.2839	0.2709	0.3841	0.1054	0.2205	0.0264	0.2838	0.0425	0.4962	0.406	0.1272	0.0691	0.402	0.4058	0.0057	0.0113	0.2106	0.3185	0.3384
[truncated: 290 more columns]
